# Supplementary material for: Asymmetric semipinacol rearrangement of 2,3-allenols with N-bromo-1,8-naphthalimide
Source: Royal Society of Chemistry journal article supplement (doi:10.1039/c4cc00767k), 2014-01-01
Supplement: c4cc00767k1.pdf [file c4cc00767k1.pdf]

**Asymmetric semipinacol rearrangement of 2,3-allenols with  
N-bromo-1,8-naphthalimide**

Binjie Guo, Chunling Fu,<sup>\*</sup> Shengming Ma<sup>\*</sup>

*Laboratory of Molecular Recognition and Synthesis, Department of Chemistry,  
Zhejiang University, Hangzhou 310027, Zhejiang, People's Republic of China*

Fax: (+86) 21-62609305

E-mail: [masm@sioc.ac.cn](mailto:masm@sioc.ac.cn)

**Supporting Information**

|                                                                                                                                                    |     |
|----------------------------------------------------------------------------------------------------------------------------------------------------|-----|
| <b>General methods</b>                                                                                                                             | S2  |
| <b>Part 1.</b> Optimization of reaction conditions                                                                                                 | S3  |
| <b>Part 2.</b> Synthesis of racemic products <i>rac</i> - <b>3a</b> ~ <b>3q</b>                                                                    | S12 |
| <b>Part 3.</b> Synthesis of optically active products <i>R</i> - <b>3a</b> ~ <b>3n</b> , <i>S</i> - <b>3o</b> and <i>R</i> - <b>3p</b> ~ <b>3q</b> | S24 |
| <sup>1</sup> H and <sup>13</sup> C NMR spectra of all these compounds                                                                              | S48 |

**General methods:**

$^1\text{H}$  and  $^{13}\text{C}$  NMR spectra were recorded with the an instrument operated at 300 and 75 MHz, respectively, in  $\text{CDCl}_3$ . Chemical shift ( $\delta$ ) are given in parts per million (ppm) with the residual peak of  $\text{CHCl}_3$  at 7.260 ppm or TMS at 0.000 ppm as the internal standard. Infrared spectra were recorded with a Perkin–Elmer 983G instrument. Elemental analyses were recorded with a Carlo-Erba EA1110 elementary analysis instrument. Mass spectra were performed with an HP 5989A system. High-resolution mass spectra were recorded with a Finnigan MAT 8430 or Bruker APEXIII instrument. Flash column chromatography was performed on silica gel (10-40  $\mu$ ). Toluene was refluxed over sodium wire using diphenyl ketone as indicator and distilled.

## Part 1. Optimization of reaction conditions

All reactions in **Tables S1-6** were carried out with 0.1 mmol of **1a** unless otherwise noted. And the % ees of product **3a** were determined with the following HPLC conditions: OJ-H column, *n*-hexane/*i*-PrOH = 80/20, 1.2 mL/min,  $\lambda = 230$  nm.

**Table S1.** The effect of temperature

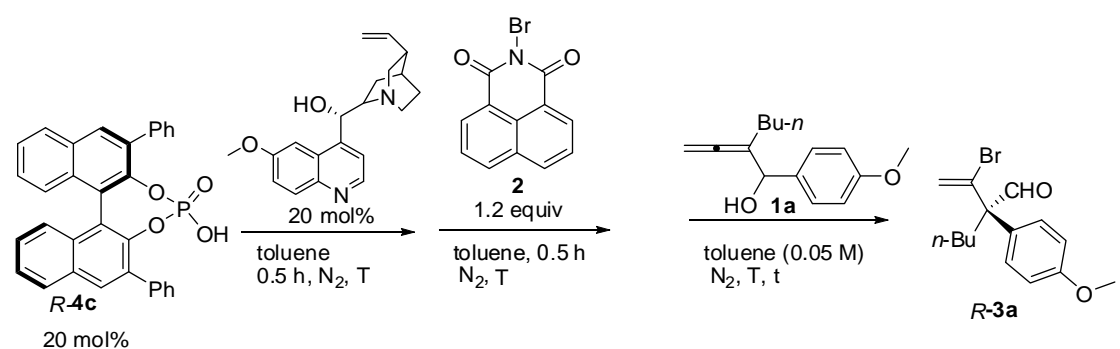

| Entry             | T (°C) | t (h) | Isolated yield     | ee of <b>R-3a</b> | No.   |
|-------------------|--------|-------|--------------------|-------------------|-------|
|                   |        |       | of <b>R-3a</b> (%) | (%)               |       |
| 1 <sup>a</sup>    | -78    | 24    | ~30                | 30                | 7-37  |
| 2 <sup>a, b</sup> | -78    | 24    | ~25                | 43                | 7-73  |
| 3                 | -30    | 25    | ~75                | 53                | 7-38  |
| 4 <sup>c</sup>    | 0      | 13    | 90                 | 65                | 6-196 |
| 5 <sup>c</sup>    | 10     | 11    | 87                 | 67                | 7-11  |
| 6 <sup>c</sup>    | 15     | 3     | 84                 | 68                | 7-13  |
| 7 <sup>c</sup>    | 20     | 11.5  | 83                 | 69                | 7-23  |
| 8                 | 24     | 10.7  | 85                 | 74                | 7-12  |
| 9                 | 28     | 2.8   | ~83                | 68                | 7-39  |
| 10                | 40     | 2.4   | 79                 | 59                | 7-78  |

|                 |         |      |    |    |      |
|-----------------|---------|------|----|----|------|
| 11 <sup>d</sup> | 24 (rt) | 11   | 85 | 69 | 7-24 |
| 12 <sup>e</sup> | 23 (rt) | 12   | 36 | 53 | 7-47 |
| 13 <sup>f</sup> | 23 (rt) | 12.3 | 80 | 72 | 7-46 |
| 14 <sup>g</sup> | 24      | 5    | 80 | 68 | 7-25 |
| 15 <sup>h</sup> | 23      | 16   | 80 | 65 | 7-28 |

<sup>a</sup> Starting material **1a** was not completely converted. <sup>b</sup> The solution of quinidine and **R-4c** in 1 mL of toluene was stirred at rt for 0.5 h, **2** was then added and the resulting mixture was stirred for another 0.5 h at rt; then allenol **1a** and 1 mL of toluene were added; the resulting mixture was stirred at -78 °C; <sup>c</sup> The solution of quinidine and **2** in 1 mL of toluene was stirred for 0.5 h, **R-4c** was then added and the resulting mixture was stirred for another 0.5 h; then allenol **1a** and 1 mL of toluene were added; <sup>d</sup> **2** (0.2 equiv) was added every 1.5 h; <sup>e</sup> The solution of **1a** in 1 mL of toluene was added by syringe pump within 10 h; <sup>f</sup> The concentration was 0.025 M; <sup>g</sup> 4Å MS (40 mg) was added; <sup>h</sup> H<sub>2</sub>O (3.0 equiv) of was added.

**Table S2.** The effect of solvent

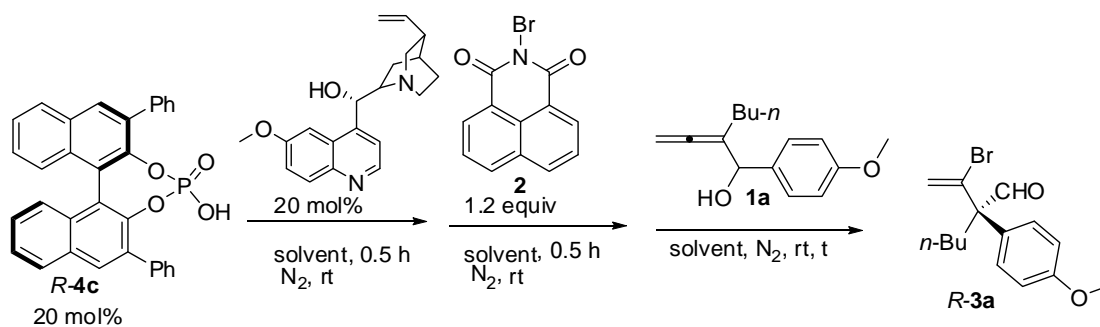

| Entry           | Solvent                                                                                           | t (h) | Isolated yield     |                       | No.  |
|-----------------|---------------------------------------------------------------------------------------------------|-------|--------------------|-----------------------|------|
|                 |                                                                                                   |       | of <b>R-3a</b> (%) | ee of <b>R-3a</b> (%) |      |
| 1               | DCE                                                                                               | 1.8   | 92                 | 27                    | 7-31 |
| 2               | $CHCl_3$                                                                                          | 1.7   | 92                 | 18                    | 7-32 |
| 3               | THF                                                                                               | 21.7  | 88                 | 0                     | 7-33 |
| 4               | MeCN                                                                                              | 1.7   | 98                 | 23                    | 7-35 |
| 5 <sup>a</sup>  | MeNO <sub>2</sub>                                                                                 | 18    | 0                  | -                     | 7-36 |
| 6               | DMF                                                                                               | 4.7   | 77                 | 0                     | 7-60 |
| 7               | Et <sub>2</sub> O                                                                                 | 5     | 75                 | 29                    | 7-40 |
| 8 <sup>a</sup>  | <i>n</i> -hexane                                                                                  | 24    | ~39                | 5                     | 7-41 |
| 9               | <i>c</i> -hexane                                                                                  | 24    | ~67                | 10                    | 7-44 |
| 10              | benzene                                                                                           | 11    | ~77                | 70                    | 7-42 |
| 11              | xylenes                                                                                           | 4.3   | ~81                | 61                    | 7-43 |
| 12              | toluene                                                                                           | 12.3  | ~80                | 72                    | 7-46 |
| 13              | 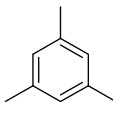               | 11.3  | 76                 | 52                    | 7-93 |
| 14 <sup>a</sup> |  -Pr- <i>i</i> | 39.5  | -                  | 6                     | 7-94 |

|    |                                                                                     |      |     |    |       |
|----|-------------------------------------------------------------------------------------|------|-----|----|-------|
| 15 | 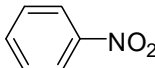   | 11.2 | 87  | 19 | 7-95  |
| 16 | PhCl                                                                                | 11   | 77  | 55 | 7-104 |
| 17 | CCl <sub>4</sub>                                                                    | 3.5  | 85  | 56 | 7-97  |
| 18 |    | 11   | 75  | 3  | 7-126 |
| 19 |    | 5    | 73  | 60 | 7-128 |
| 20 |    | 5    | 74  | 51 | 7-129 |
| 21 |    | 11   | 75  | 64 | 7-127 |
| 22 |    | 5.5  | ~93 | 2  | 7-134 |
| 23 |   | 5.5  | ~86 | 0  | 7-135 |
| 24 |  | 2    | ~77 | 2  | 7-136 |
| 25 |  | 21.3 | 81  | 32 | 7-138 |
| 26 |  | 40.5 | ~58 | 17 | 7-139 |
| 27 |  | 21.3 | ~74 | 0  | 7-140 |
| 28 |  | 21.2 | 81  | 7  | 7-141 |
| 29 |  | 11   | 69  | 39 | 7-142 |

<sup>a</sup> Starting material **1a** was not completely converted.

**Table S3.** The effect of quinidine derivatives

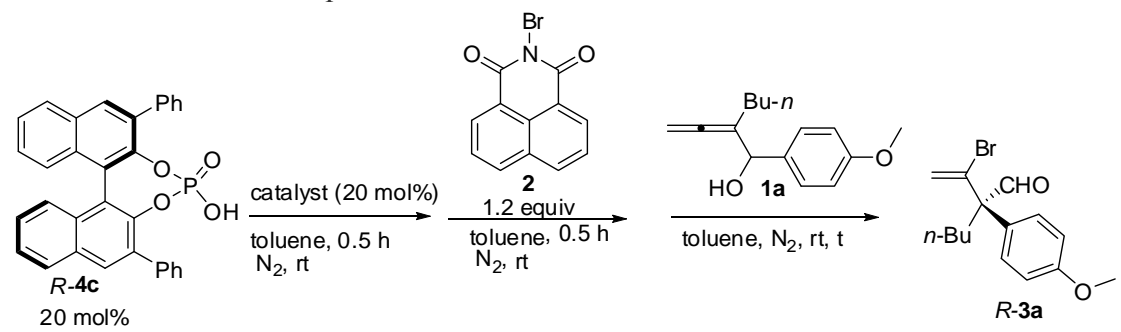

| Entry          | Catalyst<br>(20 mol%) | t (h) | Isolated yield<br>of <b>R-3a</b> (%) | ee of <b>R-3a</b> (%) | No.    |
|----------------|-----------------------|-------|--------------------------------------|-----------------------|--------|
| 1              |                       | 12.3  | 80                                   | 72                    | 7-46   |
| 2              |                       | 1.5   | 75                                   | -13                   | 7-18   |
| 3              |                       | 11    | ~76                                  | 2                     | 7-49   |
| 4              |                       | 7     | ~88                                  | 0                     | 7-58   |
| 5              |                       | 11    | 79                                   | 0                     | 7-80   |
| 6              |                       | 11.5  | 92                                   | 4                     | 7-87   |
| 7              |                       | 12.7  | ~85                                  | 0                     | 9-23   |
| 8 <sup>a</sup> | quinoline             | 11    | 80                                   | -5                    | 11-189 |
| 9 <sup>a</sup> | $PPh_3$               | 12    | 80                                   | 0                     | 11-188 |

<sup>a</sup> 15 mol% of catalyst and 5 mol% of **R-4c** were used.

**Table S4.** The effect of additives

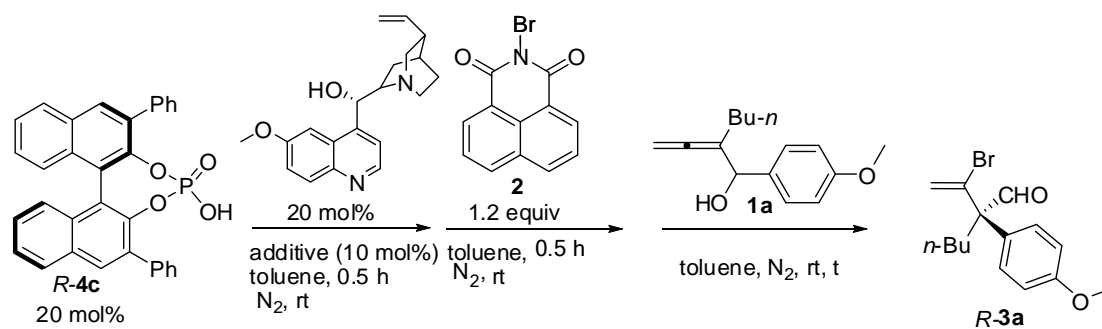

| Entry           | Additive<br>(10 mol%)                                                               | t (h) | Isolated yield<br>of <b>R-3a</b> (%) | ee of <b>R-3a</b> (%) | No.   |
|-----------------|-------------------------------------------------------------------------------------|-------|--------------------------------------|-----------------------|-------|
| 1               | -                                                                                   | 11    | 73                                   | 71                    | 8-38  |
| 2 <sup>a</sup>  | MeOH                                                                                | 3     | 82                                   | 74                    | 8-95  |
| 3               | EtOH                                                                                | 14    | 78                                   | 72                    | 8-41  |
| 4               | <i>i</i> -PrOH                                                                      | 6.5   | 75                                   | 72                    | 8-49  |
| 5               | <i>t</i> -BuOH                                                                      | 5.4   | 77                                   | 70                    | 8-50  |
| 6 <sup>a</sup>  | <i>s</i> -Butanol                                                                   | 3     | 79                                   | 73                    | 8-101 |
| 7 <sup>a</sup>  | CH <sub>2</sub> OHCH <sub>2</sub> OH                                                | 3     | 78                                   | 69                    | 8-102 |
| 8               | 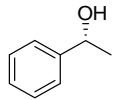 | 5     | 82                                   | 70                    | 8-63  |
| 9               |  | 12    | 80                                   | 72                    | 8-79  |
| 10              |  | 15.3  | 84                                   | -2                    | 8-78  |
| 11 <sup>a</sup> |  | 3.6   | ~69                                  | 72                    | 8-183 |

<sup>a</sup> 5 mol% of **R-4c** and 15 mol% of quinidine were used.



**Table S5.** The effect of the ratio of each component in the catalyst

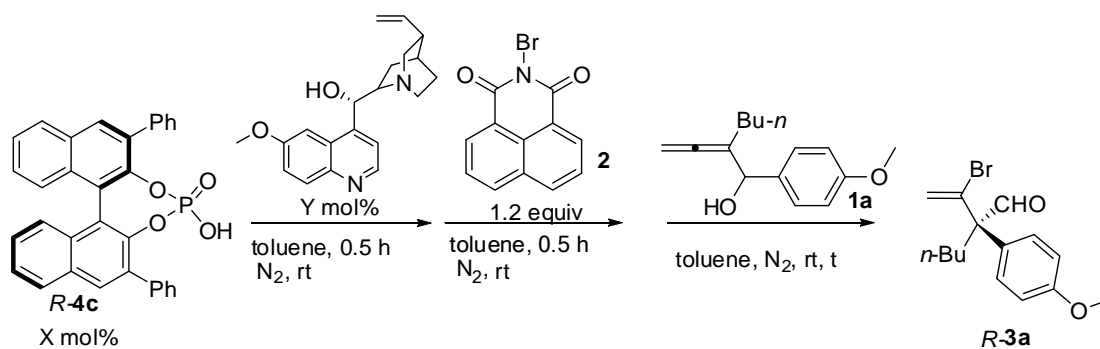

| Entry          | X (mol%) | Y (mol%) | t (h) | Isolated yield     |                       | No.   |
|----------------|----------|----------|-------|--------------------|-----------------------|-------|
|                |          |          |       | of <b>R-3a</b> (%) | ee of <b>R-3a</b> (%) |       |
| 1              | 30       | 30       | 1.3   | 83                 | 70                    | 7-48  |
| 2              | 20       | 20       | 12.3  | 80                 | 72                    | 7-46  |
| 3              | 15       | 20       | 3     | 79                 | 72                    | 7-66  |
| 4              | 10       | 20       | 3     | 79                 | 71                    | 7-67  |
| 5              | 5        | 20       | 3     | 81                 | 68                    | 7-68  |
| 6              | 5        | 15       | 1.3   | ~84                | 69                    | 7-79  |
| 7 <sup>a</sup> | 5        | 15       | 3     | 82                 | 74                    | 8-95  |
| 8              | 5        | 10       | 4.3   | 79                 | 61                    | 6-179 |

<sup>a</sup> MeOH (10 mol%) was added.

**Table S6.** The effect of X<sup>+</sup> sources

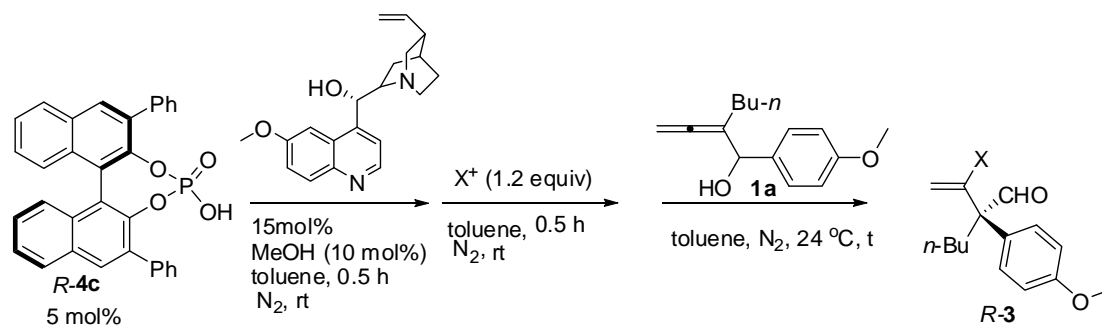

| Entry | X <sup>+</sup> | t (h) | Isolated yield of <i>R-3</i> | ee of <i>R-3</i> | No.   |
|-------|----------------|-------|------------------------------|------------------|-------|
|       |                |       | (%)                          | (%)              |       |
| 1     |                | 2.7   | 73 ( <i>R-3a</i> )           | 27               | 8-107 |
| 2     |                | 2.6   | 76 ( <i>R-3a</i> )           | 39               | 8-108 |
| 3     |                | 2.8   | 78 ( <i>R-3a</i> )           | 28               | 8-110 |
| 4     |                | 1     | 68 ( <i>R-3a</i> )           | 8                | 8-111 |
| 5     |                | 3     | 82 ( <i>R-3a</i> )           | 74               | 8-95  |
| 6     |                | 1.3   | ~79 ( <i>R-3a</i> )          | 32               | 8-112 |
| 7     |                | 1     | ~84 ( <i>R-3a</i> )          | 0                | 8-119 |

|    |                                                                                   |     |                                           |    |       |
|----|-----------------------------------------------------------------------------------|-----|-------------------------------------------|----|-------|
| 8  | 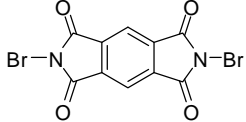 | 11  | ~67 ( <i>R-3a</i> )                       | 28 | 8-117 |
| 9  |  | 2.3 | ~61 ( <i>R-3a</i> )                       | 43 | 9-9   |
| 10 | NIS                                                                               | 25  | ~50 ( <i>R-3a'</i> , X= I) <sup>a</sup>   | 11 | 8-123 |
| 11 | NCS                                                                               | 49  | ~45( <i>R-3a''</i> , X = Cl) <sup>a</sup> | 0  | 8-125 |

<sup>a</sup> These two compounds have not been fully characterized due to the issue of purity.

## Part 2. Synthesis of racemic products *rac-3a~3q*

### 1. Synthesis of 3-bromo-2-butyl-2-(4-methoxyphenyl)-3-butenal *rac-3a* (Gbj-8-165)

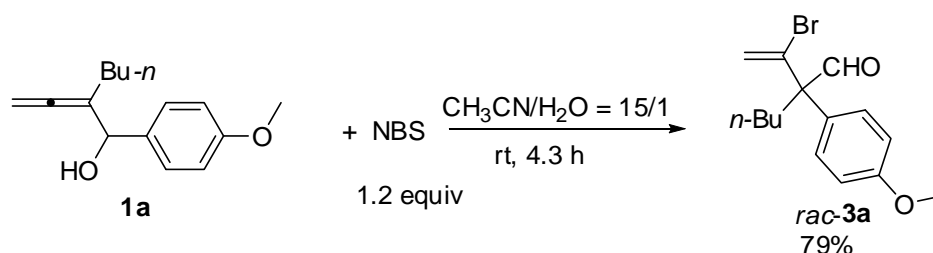

**Typical Procedure I:** To a solution of **1a** (116.3 mg, 0.5 mmol) in MeCN (4.5 mL) and H<sub>2</sub>O (0.3 mL) was added NBS (106.9 mg, 0.6 mmol). The resulting mixture was stirred at room temperature. After the reaction was complete as monitored by TLC, the mixture was then quenched with a saturated aqueous solution of Na<sub>2</sub>S<sub>2</sub>O<sub>3</sub> (4 mL), which was followed by the addition of 10 mL of water. This resulting mixture was extracted with diethyl ether (3×15 mL), washed with a saturated aqueous solution of NaCl, and dried over Na<sub>2</sub>SO<sub>4</sub>. Filtration, evaporation, and column chromatography on silica gel (petroleum ether/ethyl acetate = 50:1) afforded *rac-3a*<sup>[1]</sup> (123.2 mg, 79%): Liquid; <sup>1</sup>H NMR (300 MHz, CDCl<sub>3</sub>) δ 9.60 (s, 1H, CHO), 7.25 (d, *J* = 8.1 Hz, 2H, ArH), 6.93 (d, *J* = 8.4 Hz, 2H, ArH), 6.02 (d, *J* = 1.8 Hz, 1H, =CH), 5.94 (d, *J* = 2.1 Hz, 1H =CH), 3.81 (s, 3H, OCH<sub>3</sub>), 2.28-2.14 (m, 1H, one proton of CH<sub>2</sub>), 2.13-1.97 (m, 1H one proton of CH<sub>2</sub>), 1.50-1.09 (m, 4H, 2×CH<sub>2</sub>), 0.94 (t, *J* = 7.4 Hz, 3H, CH<sub>3</sub>); <sup>13</sup>C NMR (75 MHz, CDCl<sub>3</sub>) δ 195.8, 159.2, 134.3, 129.3, 128.5, 121.1, 114.2, 65.0, 55.2, 31.4, 26.9, 23.1, 13.9; IR (neat) ν (cm<sup>-1</sup>) 2957, 2933, 2871, 2837, 2719, 1728, 1607, 1580, 1511, 1464, 1442, 1417, 1380, 1298, 1254, 1184, 1094, 1037; MS (70 eV, EI) *m/z* (%): 312 (M<sup>+</sup>(<sup>81</sup>Br), 2.48), 310 (M<sup>+</sup>(<sup>79</sup>Br), 3.31), 160 (100).

The following compounds (*rac-3b~3q*) were prepared according to **Typical**

## Procedure I.

### 2. Synthesis of 3-bromo-2-ethyl-2-(4-methoxyphenyl)-3-butenal *rac*-**3b** (gbj-8-181)

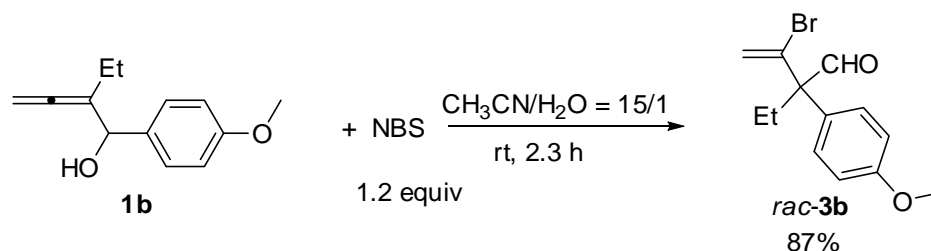

The reaction of **1b** (102.6 mg, 0.5 mmol) and NBS (106.3 mg, 0.6 mmol) in 4.5 mL of MeCN and 0.3 mL of H<sub>2</sub>O at rt for 2.3 h afforded *rac*-**3b**<sup>[1]</sup> (123.3 mg, 87%): Liquid; <sup>1</sup>H NMR (300 MHz, CDCl<sub>3</sub>) δ 9.60 (s, 1H, CHO), 7.25 (d, *J* = 9.0 Hz, 2H, ArH), 6.93 (d, *J* = 9.3 Hz, 2H, ArH), 6.02 (d, *J* = 2.7 Hz, 1H, =CH), 5.96 (d, *J* = 3.0 Hz, 1H, =CH), 3.80 (s, 3H, OCH<sub>3</sub>), 2.40-2.22 (m, 1H, one proton of CH<sub>2</sub>), 2.19-2.01 (m, 1H one proton of CH<sub>2</sub>), 0.93 (t, *J* = 7.4 Hz, 3H, CH<sub>3</sub>); <sup>13</sup>C NMR (75 MHz, CDCl<sub>3</sub>) δ 195.6, 159.1, 133.9, 129.3, 128.3, 121.3, 114.2, 65.4, 55.1, 24.4, 9.2; IR (neat) ν (cm<sup>-1</sup>) 2971, 2936, 2881, 2837, 2723, 1728, 1608, 1580, 1511, 1463, 1442, 1416, 1383, 1299, 1255, 1185, 1153, 1086, 1034; MS (70 eV, EI) *m/z* (%): 284 (M<sup>+</sup>(<sup>81</sup>Br), 3.51), 282 (M<sup>+</sup>(<sup>79</sup>Br), 2.54), 174 (100).

### 3. Synthesis of 3-bromo-2-propyl-2-(4-methoxyphenyl)-3-butenal *rac*-**3c** (gbj-8-179)

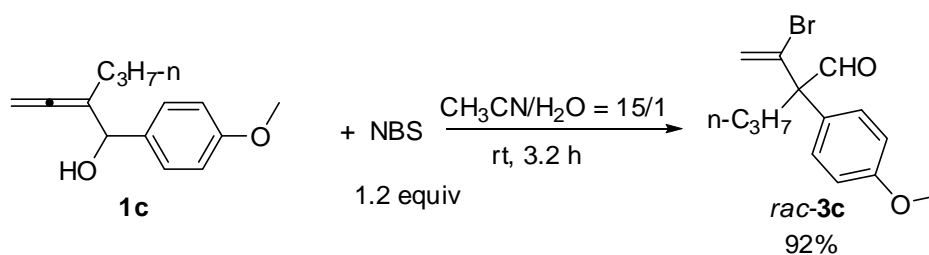

The reaction of **1c** (109.4 mg, 0.5 mmol) and NBS (107.2 mg, 0.6 mmol) in 4.5

mL of MeCN and 0.3 mL of H<sub>2</sub>O at rt for 3.2 h afforded *rac*-**3c** (136.9 mg, 92%):  
 Liquid; <sup>1</sup>H NMR (300 MHz, CDCl<sub>3</sub>) δ 9.60 (s, 1H, CHO), 7.24 (d, *J* = 8.7 Hz, 2H, ArH), 6.92 (d, *J* = 8.7 Hz, 2H, ArH), 6.01 (d, *J* = 2.7 Hz, 1H, =CH), 5.93 (d, *J* = 2.4 Hz, 1H, =CH), 3.80 (s, 3H, OCH<sub>3</sub>), 2.27-2.12 (m, 1H, one proton of CH<sub>2</sub>), 2.11-1.95 (m, 1H, one proton of CH<sub>2</sub>), 1.45-1.12 (m, 2H, CH<sub>2</sub>), 1.00 (t, *J* = 7.4 Hz, 3H, CH<sub>3</sub>);  
<sup>13</sup>C NMR (75 MHz, CDCl<sub>3</sub>) δ 195.7, 159.1, 134.2, 129.3, 128.5, 121.0, 114.2, 65.1, 55.1, 33.8, 18.2, 14.5; IR (neat) ν (cm<sup>-1</sup>) 3000, 2960, 2933, 2873, 2837, 2719, 1726, 1608, 1580, 1511, 1464, 1442, 1417, 1380, 1302, 1255, 1184, 1091, 1035; MS (70 eV, EI) *m/z* (%): 298 (M<sup>+</sup>(<sup>81</sup>Br), 3.76), 296 (M<sup>+</sup>(<sup>79</sup>Br), 4.68), 188 (100); HRMS calcd for C<sub>14</sub>H<sub>17</sub>O<sub>2</sub><sup>79</sup>Br (M<sup>+</sup>): 296.0412. Found: 296.0408.

#### 4. Synthesis of 3-bromo-2-pentyl-2-(4-methoxyphenyl)-3-butenal *rac*-**3d** (Gbj-8-176)

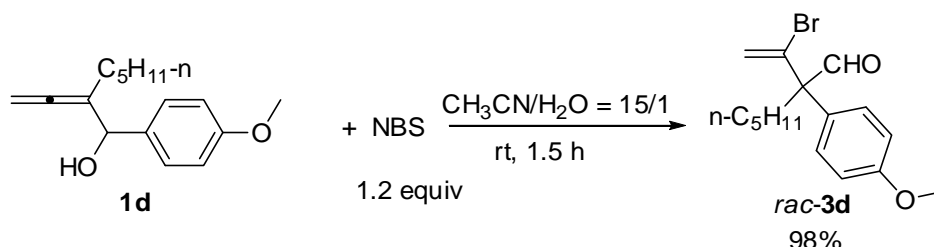

The reaction of **1d** (123.1 mg, 0.5 mmol) and NBS (107.2 mg, 0.6 mmol) in 4.5 mL of MeCN and 0.3 mL of H<sub>2</sub>O at rt for 1.5 h afforded *rac*-**3d** (158.9 mg, 98%):  
 Liquid; <sup>1</sup>H NMR (300 MHz, CDCl<sub>3</sub>) δ 9.60 (s, 1H, CHO), 7.24 (d, *J* = 8.7 Hz, 2H, ArH), 6.92 (d, *J* = 8.7 Hz, 2H, ArH), 6.02 (d, *J* = 2.7 Hz, 1H, =CH), 5.93 (d, *J* = 2.7 Hz, 1H, =CH), 3.79 (s, 3H, OCH<sub>3</sub>), 2.28-2.13 (m, 1H, one proton of CH<sub>2</sub>), 2.12-1.95 (m, 1H, one proton of CH<sub>2</sub>), 1.47-1.12 (m, 6H, 3 × CH<sub>2</sub>), 0.90 (t, *J* = 6.6 Hz, 3H, CH<sub>3</sub>);  
<sup>13</sup>C NMR (75 MHz, CDCl<sub>3</sub>) δ 195.7, 159.1, 134.3, 129.3, 128.5, 121.0, 114.2, 65.0,

55.1, 32.1, 31.6, 24.4, 22.4, 14.0; IR (neat)  $\nu$  (cm<sup>-1</sup>) 3000, 2955, 2929, 2870, 2834, 2719, 1732, 1607, 1580, 1514, 1463, 1438, 1417, 1379, 1299, 1255, 1184, 1096, 1036; MS (70 eV, EI)  $m/z$  (%): 326 (M<sup>+</sup>(<sup>81</sup>Br), 5.28), 324 (M<sup>+</sup>(<sup>79</sup>Br), 5.51), 160 (100); HRMS calcd for C<sub>16</sub>H<sub>21</sub>O<sub>2</sub><sup>79</sup>Br (M<sup>+</sup>): 324.0725. Found: 324.0728.

#### 5. Synthesis of 3-bromo-2-hexyl-2-(4-methoxyphenyl)-3-butenal *rac*-**3e** (gbj-8-184)

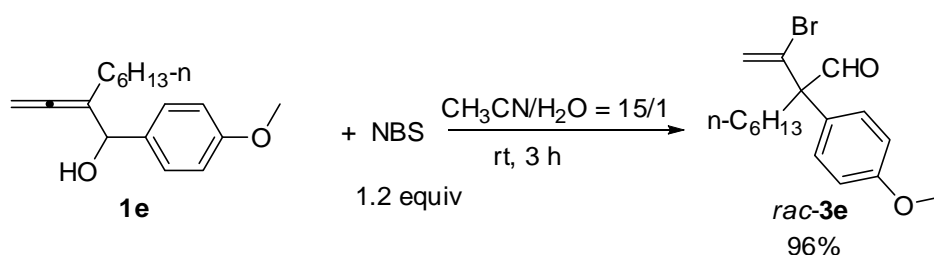

The reaction of **1e** (130.5 mg, 0.5 mmol) and NBS (107.5 mg, 0.6 mmol) in 4.5 mL of MeCN and 0.3 mL of H<sub>2</sub>O at rt for 3 h afforded *rac*-**3e** (163.8 mg, 96%): Liquid; <sup>1</sup>H NMR (300 MHz, CDCl<sub>3</sub>)  $\delta$  9.60 (s, 1H, CHO), 7.24 (d,  $J$  = 8.4 Hz, 2H, ArH), 6.92 (d,  $J$  = 8.7 Hz, 2H, ArH), 6.02 (d,  $J$  = 2.7 Hz, 1H, =CH), 5.93 (d,  $J$  = 2.7 Hz, 1H, =CH), 3.80 (s, 3H, OCH<sub>3</sub>), 2.29-2.14 (m, 1H, one proton of CH<sub>2</sub>), 2.13-1.97 (m, 1H, one proton of CH<sub>2</sub>), 1.48-1.10 (m, 8H, 4  $\times$  CH<sub>2</sub>), 0.89 (t,  $J$  = 6.3 Hz, 3H, CH<sub>3</sub>); <sup>13</sup>C NMR (75 MHz, CDCl<sub>3</sub>)  $\delta$  195.7, 159.1, 134.3, 129.3, 128.5, 121.0, 114.2, 65.0, 55.1, 31.6, 31.5, 29.6, 24.7, 22.6, 14.0; IR (neat)  $\nu$  (cm<sup>-1</sup>) 2997, 2953, 2929, 2856, 2719, 1727, 1607, 1580, 1511, 1464, 1442, 1417, 1378, 1299, 1255, 1184, 1144, 1097, 1035; MS (70 eV, EI)  $m/z$  (%): 340 (M<sup>+</sup>(<sup>81</sup>Br), 4.69), 338 (M<sup>+</sup>(<sup>79</sup>Br), 4.50), 160 (100); HRMS calcd for C<sub>17</sub>H<sub>23</sub>O<sub>2</sub><sup>79</sup>Br (M<sup>+</sup>): 338.0881. Found: 338.0887.

#### 6. Synthesis of 3-bromo-2-decyl-2-(4-methoxyphenyl)-3-butenal *rac*-**3f** (Gbj-8-174)

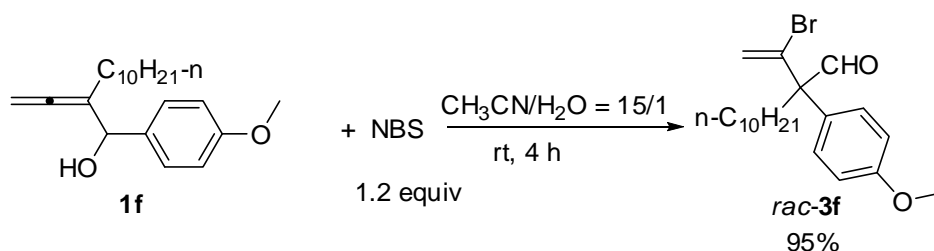

The reaction of **1f** (158.6 mg, 0.5 mmol) and NBS (107.4 mg, 0.6 mmol) in 4.5 mL of MeCN and 0.3 mL of H<sub>2</sub>O at rt for 4 h afforded *rac*-**3f** (187.8 mg, 95%): Liquid; <sup>1</sup>H NMR (300 MHz, CDCl<sub>3</sub>) δ 9.60 (s, 1H CHO), 7.24 (d, *J* = 8.7 Hz, 2H, ArH), 6.92 (d, *J* = 8.7 Hz, 2H, ArH), 6.02 (d, *J* = 2.7 Hz, 1H, =CH), 5.93 (d, *J* = 2.4 Hz, 1H, =CH), 3.80 (s, 3H, OCH<sub>3</sub>), 2.28-2.13 (m, 1H, one proton of CH<sub>2</sub>), 2.13-1.96 (m, 1H, one proton of CH<sub>2</sub>), 1.46-1.12 (m, 16H, 8 × CH<sub>2</sub>), 0.88 (t, *J* = 6.6 Hz, 3H, CH<sub>3</sub>); <sup>13</sup>C NMR (75 MHz, CDCl<sub>3</sub>) δ 195.8, 159.2, 134.3, 129.3, 128.6, 121.1, 114.2, 65.1, 55.2, 31.9, 31.7, 30.0, 29.6, 29.4, 29.3, 24.8, 22.7, 14.1; IR (neat) ν (cm<sup>-1</sup>) 3000, 2953, 2925, 2853, 2718, 1731, 1608, 1580, 1512, 1464, 1442, 1417, 1378, 1299, 1255, 1184, 1142, 1101, 1037; MS (70 eV, EI) *m/z* (%): 396 (M<sup>+</sup>(<sup>81</sup>Br), 2.29), 394 (M<sup>+</sup>(<sup>79</sup>Br), 2.63), 160 (100); HRMS calcd for C<sub>21</sub>H<sub>31</sub>O<sub>2</sub><sup>79</sup>Br (M<sup>+</sup>): 394.1507. Found: 394.1517.

7. Synthesis of 3-bromo-2-isopropyl-2-(4-methoxyphenyl)-3-butenal *rac*-**3g** (gbj-9-16)

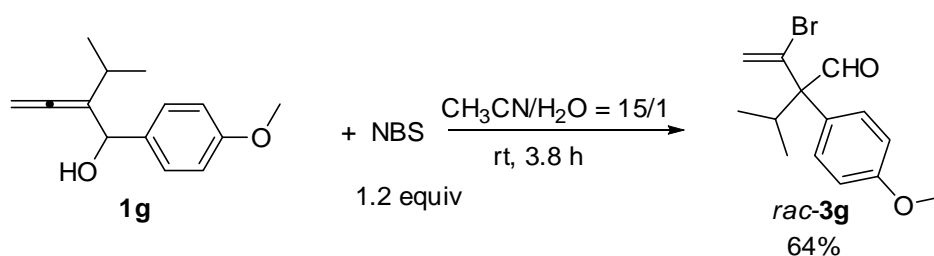

The reaction of **1g** (109.2 mg, 0.5 mmol) and NBS (106.7 mg, 0.6 mmol) in 4.5



mL of MeCN and 0.3 mL of H<sub>2</sub>O at rt for 3.8 h afforded *rac*-**3g** (95.4 mg, 64%):  
 Liquid; <sup>1</sup>H NMR (300 MHz, CDCl<sub>3</sub>) δ 9.60 (s, 1H, CHO), 7.17 (d, *J* = 8.7 Hz, 2H, ArH), 6.93 (d, *J* = 9.0 Hz, 2H, ArH), 6.02 (d, *J* = 2.7 Hz, 1H, =CH), 5.98 (d, *J* = 2.4 Hz, 1H, =CH), 3.82 (s, 3H, OCH<sub>3</sub>), 2.92 (heptet, *J* = 6.8 Hz, 1H, CH), 0.97 (d, *J* = 6.9 Hz, 3H, CH<sub>3</sub>), 0.92 (d, *J* = 6.9 Hz, 3H, CH<sub>3</sub>); <sup>13</sup>C NMR (75 MHz, CDCl<sub>3</sub>) δ 196.8, 158.8, 133.0, 130.7, 127.3, 123.4, 113.6, 69.2, 55.2, 30.4, 18.5, 18.2; IR (neat) ν (cm<sup>-1</sup>) 3036, 2967, 2936, 2877, 2837, 2720, 1727, 1610, 1579, 1513, 1490, 1464, 1442, 1389, 1370, 1296, 1255, 1186, 1124, 1097, 1073, 1035; MS (70 eV, EI) *m/z* (%): 298 (M<sup>+</sup>(<sup>81</sup>Br), 14.21), 296 (M<sup>+</sup>(<sup>79</sup>Br), 13.37), 188 (100); HRMS calcd for C<sub>14</sub>H<sub>17</sub>O<sub>2</sub><sup>79</sup>Br (M<sup>+</sup>): 296.0412. Found: 296.0422.

8. Synthesis of 3-bromo-2-cyclohexyl-2-(4-methoxyphenyl)-3-butenal *rac*-**3h** (gbj-9-14)

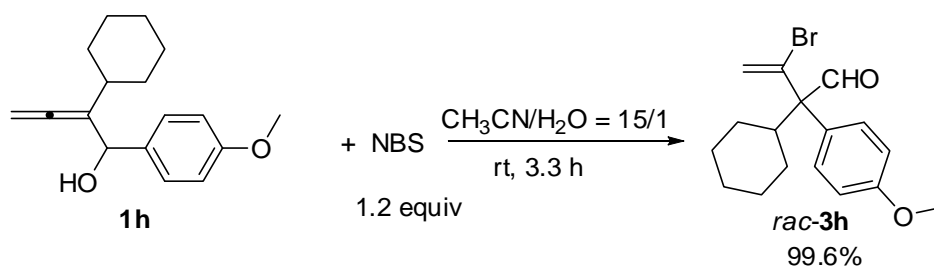

The reaction of **1h** (129.1 mg, 0.5 mmol) and NBS (107.4 mg, 0.6 mmol) in 4.5 mL of MeCN and 0.3 mL of H<sub>2</sub>O at rt for 3.3 h afforded *rac*-**3h** (167.9 mg, 99.6%):  
 Liquid; <sup>1</sup>H NMR (300 MHz, CDCl<sub>3</sub>) δ 9.57 (s, 1H, CHO), 7.14 (d, *J* = 8.7 Hz, 2H, ArH), 6.92 (d, *J* = 9.0 Hz, 2H, ArH), 6.00 (d, *J* = 2.4 Hz, 1H, =CH), 5.96 (d, *J* = 2.4 Hz, 1H, =CH), 3.82 (s, 3H, OCH<sub>3</sub>), 2.51 (t, *J* = 11.7 Hz, 1H, CH), 1.92-1.53 (m, 5H, 2 × CH<sub>2</sub> and one proton of CH<sub>2</sub>), 1.47-1.22 (m, 2H, CH<sub>2</sub>), 1.16-0.74 (m, 3H, CH<sub>2</sub> and

one proton of CH<sub>2</sub>); <sup>13</sup>C NMR (75 MHz, CDCl<sub>3</sub>) δ 196.6, 158.7, 133.1, 130.7, 127.5, 123.3, 113.6, 69.2, 55.1, 41.2, 28.9, 28.6, 26.8, 26.7, 26.4; IR (neat) ν (cm<sup>-1</sup>) 3001, 2932, 2853, 2714, 1727, 1609, 1579, 1512, 1462, 1453, 1417, 1296, 1255, 1185, 1154, 1123, 1037; MS (70 eV, EI) *m/z* (%): 338 (M<sup>+</sup>(<sup>81</sup>Br), 10.28), 336 (M<sup>+</sup>(<sup>79</sup>Br), 10.30), 307 (100); HRMS calcd for C<sub>17</sub>H<sub>21</sub>O<sub>2</sub><sup>79</sup>Br (M<sup>+</sup>): 336.0725. Found: 336.0728.

#### 9. Synthesis of 2-allyl-3-bromo-2-(4-methoxyphenyl)-3-butenal *rac*-**3i** (gbj-8-198)

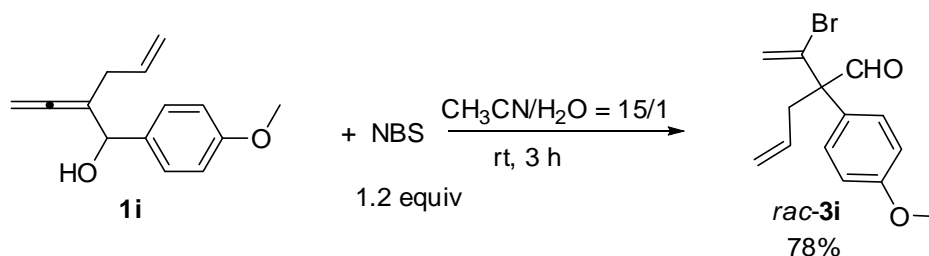

The reaction of **1i** (107.9 mg, 0.5 mmol) and NBS (107.1 mg, 0.6 mmol) in 4.5 mL of MeCN and 0.3 mL of H<sub>2</sub>O at rt for 3 h afforded *rac*-**3i**<sup>[1]</sup> (114.4 mg, 78%): Liquid; <sup>1</sup>H NMR (300 MHz, CDCl<sub>3</sub>) δ 9.64 (s, 1H, CHO), 7.24 (d, *J* = 8.7 Hz, 2H, ArH), 6.93 (d, *J* = 9.0 Hz, 2H, ArH), 6.06-5.85 (m, 2H, =CH<sub>2</sub>), 5.82-5.60 (m, 1H, =CH), 5.19 (dd, *J* = 17.1 Hz and 0.9 Hz, 1H, one proton of =CH<sub>2</sub>), 5.11 (d, *J* = 10.2 Hz, 1H, one proton of =CH<sub>2</sub>), 3.80 (s, 3H, OCH<sub>3</sub>), 3.05 (dd, *J* = 14.1 and 6.6 Hz, 1H, one proton of CH<sub>2</sub>), 2.86 (dd, *J* = 14.3 and 7.4 Hz, 1H, one proton of CH<sub>2</sub>); <sup>13</sup>C NMR (75 MHz, CDCl<sub>3</sub>) δ 195.7, 159.2, 133.6, 132.7, 129.4, 127.9, 121.5, 118.8, 114.2, 64.7, 55.2, 36.4; IR (neat) ν (cm<sup>-1</sup>) 3078, 3036, 3005, 2977, 2957, 2934, 2911, 2837, 2720, 1727, 1640, 1608, 1580, 1512, 1463, 1442, 1417, 1299, 1255, 1185, 1098, 1033; MS (70 eV, EI) *m/z* (%): 296 (M<sup>+</sup>(<sup>81</sup>Br), 14.33), 294 (M<sup>+</sup>(<sup>79</sup>Br), 15.50), 145 (100).

#### 10. Synthesis of 2-benzyl-3-bromo-2-(4-methoxyphenyl)-3-butenal *rac*-**3j** (gbj-10-78)

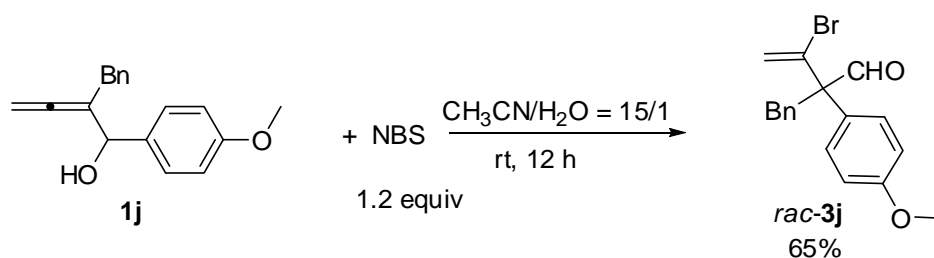

The reaction of **1j** (133.2 mg, 0.5 mmol) and NBS (107.3 mg, 0.6 mmol) in 4.5 mL of MeCN and 0.3 mL of H<sub>2</sub>O at rt for 12 h afforded *rac*-**3j** (112.3 mg, 65%): Oil; <sup>1</sup>H NMR (300 MHz, CDCl<sub>3</sub>) δ 9.66 (s, 1H, CHO), 7.34-7.05 (m, 7H, ArH), 6.91 (d, *J* = 9.0 Hz, 2H, ArH), 5.82 (s, 2H, =CH<sub>2</sub>), 3.81 (s, 3H, OCH<sub>3</sub>), 3.65 (d, *J* = 13.2 Hz, 1H, one proton of ArCH<sub>2</sub>), 3.42 (d, *J* = 13.2 Hz, 1H, one proton of ArCH<sub>2</sub>); <sup>13</sup>C NMR (75 MHz, CDCl<sub>3</sub>) δ 195.4, 159.3, 136.2, 133.3, 130.7, 129.6, 128.5, 127.8, 126.7, 122.2, 114.2, 66.7, 55.2, 38.3; IR (neat) ν (cm<sup>-1</sup>) 3060, 3032, 3006, 2956, 2931, 2838, 2722, 1722, 1620, 1604, 1581, 1511, 1455, 1438, 1418, 1294, 1259, 1185, 1123, 1078, 1033; MS (70 eV, EI) *m/z* (%): 346 (M<sup>+</sup>(<sup>81</sup>Br), 13.11), 344 (M<sup>+</sup>(<sup>79</sup>Br), 11.84), 174 (100); HRMS calcd for C<sub>18</sub>H<sub>17</sub>O<sub>2</sub><sup>79</sup>Br (M<sup>+</sup>): 344.0412. Found: 344.0410.

11. Synthesis of 3-bromo-2-(3-phenylpropyl)-2-(4-methoxyphenyl)-3-butenal *rac*-**3k** (gbj-9-1)

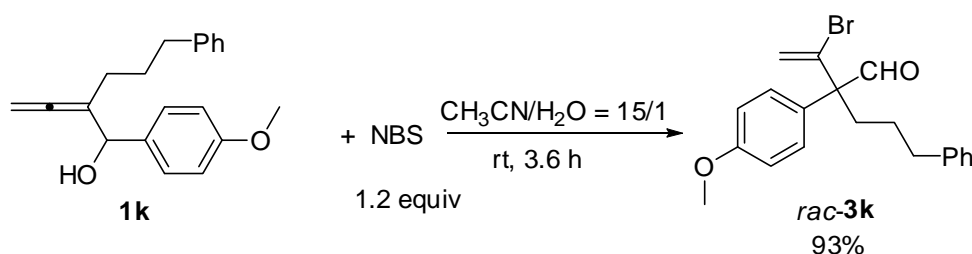

The reaction of **1k** (147.5 mg, 0.5 mmol) and NBS (107.3 mg, 0.6 mmol) in 4.5 mL of MeCN and 0.3 mL of H<sub>2</sub>O at rt for 3.6 h afforded *rac*-**3k** (173.6 mg, 93%):

solid; mp. 68.7~71.0 °C (Et<sub>2</sub>O/*n*-hexane); <sup>1</sup>H NMR (300 MHz, CDCl<sub>3</sub>) δ 9.58 (s, 1H, CHO), 7.38-7.08 (m, 7H, ArH), 6.90 (d, *J* = 9.0 Hz, 2H, ArH), 5.95 (d, *J* = 2.7 Hz, 1H, =CH), 5.91 (d, *J* = 2.4 Hz, 1H, =CH), 3.79 (s, 3H, OCH<sub>3</sub>), 2.84-2.60 (m, 2H, CH<sub>2</sub>), 2.37-2.19 (m, 1H, one proton of CH<sub>2</sub>), 2.17-1.98 (m, 1H, one proton of CH<sub>2</sub>), 1.74-1.46 (m, 2H, CH<sub>2</sub>); <sup>13</sup>C NMR (75 MHz, CDCl<sub>3</sub>) δ 195.4, 159.1, 141.7, 134.0, 129.2, 128.3, 128.2, 128.1, 125.8, 121.2, 114.2, 64.9, 55.1, 36.0, 31.0, 26.5; IR (KBr)  $\nu$  (cm<sup>-1</sup>) 3084, 3061, 3026, 3002, 2950, 2935, 2836, 2721, 1727, 1606, 1580, 1511, 1454, 1442, 1417, 1299, 1256, 1185, 1122, 1082, 1034; MS (70 eV, EI) *m/z* (%): 374 (M<sup>+</sup>(<sup>81</sup>Br), 2.25), 372 (M<sup>+</sup>(<sup>79</sup>Br), 2.48), 160 (100); Anal. calcd. for C<sub>20</sub>H<sub>21</sub>BrO<sub>2</sub>: C 64.35, H 5.67; found: C 64.42, H 5.70.

12. Synthesis of 3-bromo-2-phenyl-2-(4-methoxyphenyl)-3-butenal *rac*-**3I** (gbj-11-144)

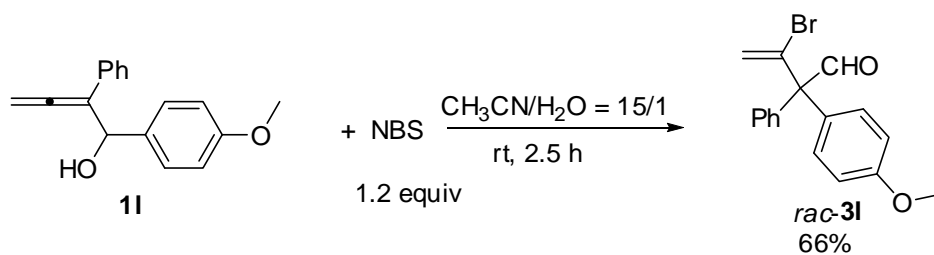

The reaction of **1I** (125.3 mg, 0.5 mmol) and NBS (107.4 mg, 0.6 mmol) in 4.5 mL of MeCN and 0.3 mL of H<sub>2</sub>O at rt for 2.5 h afforded *rac*-**3I** (108.5 mg, 66%): Liquid; <sup>1</sup>H NMR (300 MHz, CDCl<sub>3</sub>) δ 10.11 (s, 1H, CHO), 7.44-7.30 (m, 3H, ArH), 7.28-7.19 (m, 2H, ArH), 7.17-7.08 (m, 2H, ArH), 6.94-6.87 (m, 2H, ArH), 6.00 (d, *J* = 2.4 Hz, 1H, one proton of =CH<sub>2</sub>), 5.69 (d, *J* = 2.4 Hz, 1H, one proton of =CH<sub>2</sub>), 3.82 (s, 3H, CH<sub>3</sub>); <sup>13</sup>C NMR (75 MHz, CDCl<sub>3</sub>) δ 196.4, 159.2, 137.2, 133.4, 131.4, 130.1,

128.6, 128.5, 128.0, 124.4, 113.9, 71.0, 55.3; IR (neat)  $\nu$  (cm<sup>-1</sup>) 3059, 3033, 3003, 2956, 2932, 2837, 2729, 1732, 1608, 1580, 1505, 1463, 1446, 1417, 1299, 1255, 1185, 1116, 1088, 1035; MS (70 eV, EI)  $m/z$  (%): 332 (M<sup>+</sup>(<sup>81</sup>Br), 0.51), 330 (M<sup>+</sup>(<sup>79</sup>Br), 0.66), 303 (M<sup>+</sup>(<sup>81</sup>Br)-CHO, 35.54), 301 ((M<sup>+</sup>(<sup>79</sup>Br)-CHO, 37.30), 222 (100); HRMS calcd for C<sub>17</sub>H<sub>15</sub>O<sub>2</sub><sup>79</sup>Br (M<sup>+</sup>): 330.0255. Found: 330.0264.

13. Synthesis of 3-bromo-2-butyl-2-(4-ethoxyphenyl)-3-butenal *rac*-**3m** (gbj-9-29)

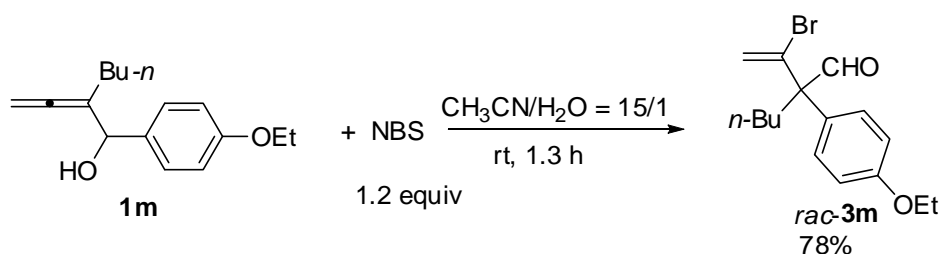

The reaction of **1m** (123.4 mg, 0.5 mmol) and NBS (106.5 mg, 0.6 mmol) in 4.5 mL of MeCN and 0.3 mL of H<sub>2</sub>O at rt for 1.3 h afforded *rac*-**3m** (126.5 mg, 78%): Liquid; <sup>1</sup>H NMR (300 MHz, CDCl<sub>3</sub>)  $\delta$  9.59 (s, 1H, CHO), 7.23 (d,  $J$  = 8.7 Hz, 2H, ArH), 6.91 (d,  $J$  = 8.7 Hz, 2H, ArH), 6.01 (d,  $J$  = 2.4 Hz, 1H, =CH), 5.92 (d,  $J$  = 2.7 Hz, 1H, =CH), 4.02 (q,  $J$  = 6.9 Hz, 2H, CH<sub>2</sub>), 2.30-2.13 (m, 1H, one proton of CH<sub>2</sub>), 2.13-1.93 (m, 1H, one proton of CH<sub>2</sub>), 1.52-1.06 (m, 7H, CH<sub>3</sub> and 2  $\times$  CH<sub>2</sub>), 0.93 (t,  $J$  = 7.2 Hz, 3H, CH<sub>3</sub>); <sup>13</sup>C NMR (75 MHz, CDCl<sub>3</sub>)  $\delta$  195.7, 158.5, 134.3, 129.3, 128.3, 121.0, 114.7, 65.0, 63.3, 31.3, 26.9, 23.1, 14.7, 13.9; IR (neat)  $\nu$  (cm<sup>-1</sup>) 2957, 2931, 2872, 2819, 2719, 1727, 1608, 1579, 1511, 1477, 1393, 1296, 1253, 1185, 1117, 1093, 1047, 1011; MS (70 eV, EI)  $m/z$  (%): 326 (M<sup>+</sup>(<sup>81</sup>Br), 2.78), 324 (M<sup>+</sup>(<sup>79</sup>Br), 2.77), 174 (100); HRMS calcd for C<sub>16</sub>H<sub>21</sub>O<sub>2</sub><sup>79</sup>Br (M<sup>+</sup>): 324.0725. Found: 324.0726.

14. Synthesis of 3-bromo-2-butyl-2-(3,4-methylenedioxyphenyl)-3-butenal *rac*-**3n**

(gbj-8-190)

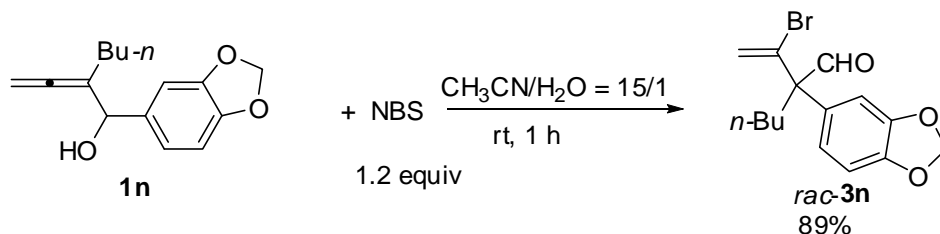

The reaction of **1n** (122.6 mg, 0.5 mmol) and NBS (107.4 mg, 0.6 mmol) in 4.5 mL of MeCN and 0.3 mL of H<sub>2</sub>O at rt for 1 h afforded *rac*-**3n**<sup>[1]</sup> (144.8 mg, 89%): Liquid; <sup>1</sup>H NMR (300 MHz, CDCl<sub>3</sub>) δ 9.58 (s, 1H, CHO), 6.88-6.73 (m, 3H, ArH), 6.04 (d, *J* = 2.4 Hz, 1H, =CH), 5.97 (s, 2H, OCH<sub>2</sub>O), 5.93 (d, *J* = 2.7 Hz, 1H, =CH), 2.26-2.10 (m, 1H, one proton of CH<sub>2</sub>), 2.10-1.93 (m, 1H one proton of CH<sub>2</sub>), 1.50-1.08 (m, 4H, 2 × CH<sub>2</sub>), 0.93 (t, *J* = 7.2 Hz, 3H, CH<sub>3</sub>); <sup>13</sup>C NMR (75 MHz, CDCl<sub>3</sub>) δ 195.4, 148.2, 147.3, 134.0, 130.4, 121.7, 121.1, 108.4, 108.3, 101.3, 65.1, 31.5, 26.9, 23.0, 13.9; IR (neat) ν (cm<sup>-1</sup>) 2957, 2931, 2872, 2774, 2716, 1727, 1618, 1504, 1487, 1438, 1380, 1351, 1243, 1166, 1112, 1094, 1040; MS (70 eV, EI) *m/z* (%): 326 (M<sup>+</sup>(<sup>81</sup>Br), 25.41), 324 (M<sup>+</sup>(<sup>79</sup>Br), 24.65), 115 (100).

15. Synthesis of 3-bromo-2-butyl-2-thienyl-3-butenal *rac*-**3o** (gbj-9-51)

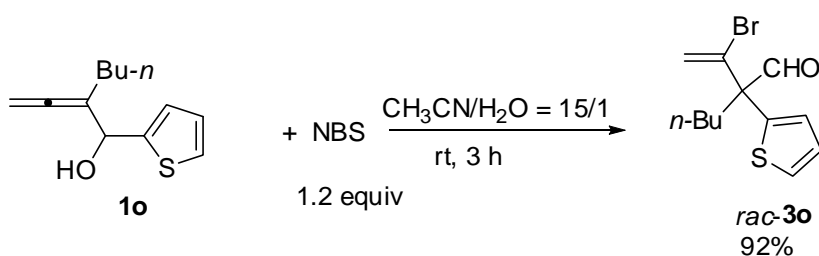

The reaction of **1o** (103.5 mg, 0.5 mmol) and NBS (106.9 mg, 0.6 mmol) in 4.5

mL of MeCN and 0.3 mL of H<sub>2</sub>O at rt for 3 h afforded *rac*-**3o** (132.0 mg, 92%):  
 Liquid; <sup>1</sup>H NMR (300 MHz, CDCl<sub>3</sub>) δ 9.58 (s, 1H, CHO), 7.36 (dd, *J* = 5.0 Hz and 1.4 Hz, 1H, ArH), 7.12-6.96 (m, 2H, ArH), 6.03 (d, *J* = 3.0 Hz, 1H, =CH), 5.93 (d, *J* = 2.7 Hz, 1H, =CH), 2.32-2.07 (m, 2H, CH<sub>2</sub>), 1.52-1.17 (m, 4H, 2 × CH<sub>2</sub>), 0.93 (t, *J* = 7.1 Hz, 3H, CH<sub>3</sub>); <sup>13</sup>C NMR (75 MHz, CDCl<sub>3</sub>) δ 193.8, 140.5, 133.1, 127.2, 127.1, 126.4, 121.1, 63.6, 33.4, 26.6, 22.9, 13.9; IR (neat) *v* (cm<sup>-1</sup>) 3108, 3069, 2957, 2931, 2871, 2816, 2714, 1732, 1619, 1466, 1429, 1380, 1238, 1156, 1095, 1047; MS (70 eV, EI) *m/z* (%): 288 (M<sup>+</sup>(<sup>81</sup>Br), 3.43), 286 (M<sup>+</sup>(<sup>79</sup>Br), 2.48), 257 (100); HRMS calcd for C<sub>12</sub>H<sub>15</sub>O<sub>2</sub>S<sup>79</sup>Br (M<sup>+</sup>): 286.0027. Found: 286.0023.

16. Synthesis of 3-bromo-2-ethyl-2-(3,4,5-trimethoxyphenyl)-3-butenal *rac*-**3p** (gbj-11-84)

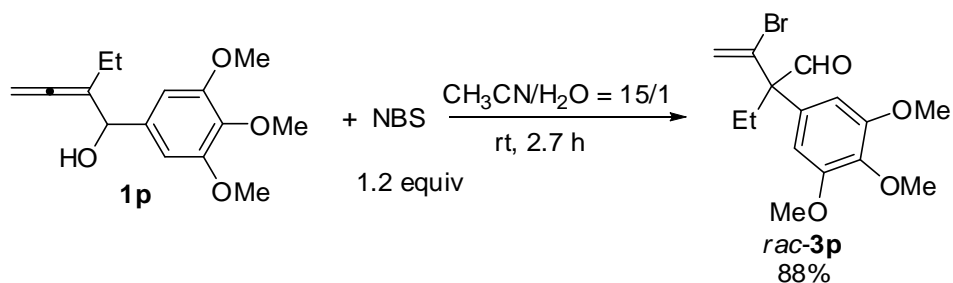

The reaction of **1p** (132.1 mg, 0.5 mmol) and NBS (107.3 mg, 0.6 mmol) in 4.5 mL of MeCN and 0.3 mL of H<sub>2</sub>O at rt for 2.7 h afforded *rac*-**3p** (150.6 mg, 88%) (petroleum ether/ethyl acetate = 10/1): Liquid; <sup>1</sup>H NMR (300 MHz, CDCl<sub>3</sub>) δ 9.62 (s, 1H, CHO), 6.53 (s, 2H, ArH), 6.06 (d, *J* = 1.8 Hz, 1H, =CH), 6.01 (d, *J* = 2.4 Hz, 1H, =CH), 3.86 (s, 9H, 3 × OCH<sub>3</sub>), 2.40-2.22 (m, 1H, one proton of CH<sub>2</sub>), 2.20-2.02 (m, 1H, one proton of CH<sub>2</sub>), 0.94 (t, *J* = 7.2 Hz, 3H, CH<sub>3</sub>); <sup>13</sup>C NMR (75 MHz, CDCl<sub>3</sub>) δ 195.3, 153.3, 137.8, 133.3, 131.9, 121.7, 105.4, 66.1, 60.8, 56.1, 24.6, 9.3; IR (neat) *v*

( $\text{cm}^{-1}$ ) 2970, 2938, 2881, 2835, 2724, 1727, 1620, 1588, 1510, 1455, 1416, 1382, 1321, 1247, 1187, 1128, 1007; MS (70 eV, EI)  $m/z$  (%): 344 ( $\text{M}^+(\text{}^{81}\text{Br})$ , 3.02), 342 ( $\text{M}^+(\text{}^{79}\text{Br})$ , 3.58), 195 (100); HRMS calcd for  $\text{C}_{15}\text{H}_{19}\text{O}_4\text{}^{79}\text{Br}$  ( $\text{M}^+$ ): 342.0467. Found: 342.0473.

17. Synthesis of 3-bromo-2-butyl-2-(4-methylphenyl)-3-butenal *rac*-**3q** (gbj-11-198)

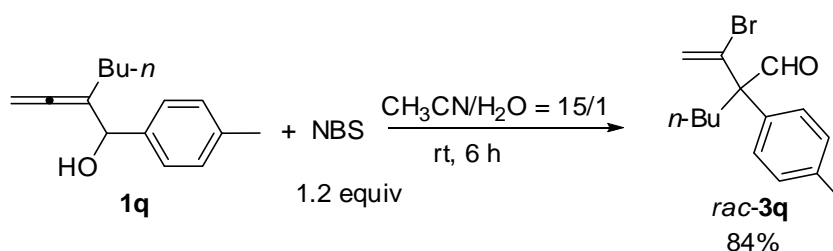

The reaction of **1q** (107.5 mg, 0.5 mmol) and NBS (107.1 mg, 0.6 mmol) in 4.5 mL of MeCN and 0.3 mL of  $\text{H}_2\text{O}$  at rt for 6 h afforded *rac*-**3q**<sup>[1]</sup> (124.0 mg, 84%): Liquid;  $^1\text{H}$  NMR (300 MHz,  $\text{CDCl}_3$ )  $\delta$  9.63 (s, 1H, CHO), 7.21 (s, 4H, ArH), 6.03 (d,  $J = 2.7$  Hz, 1H, one proton of  $=\text{CH}_2$ ), 5.95 (d,  $J = 2.7$  Hz, 1H, one proton of  $=\text{CH}_2$ ), 2.35 (s, 3H,  $\text{CH}_3$ ), 2.29-2.16 (m, 1H, one proton of  $\text{CH}_2$ ), 2.15-2.00 (m, 1H, one proton of  $\text{CH}_2$ ), 1.48-1.08 (m, 4H,  $2 \times \text{CH}_2$ ), 0.93 (t,  $J = 7.2$  Hz, 3H,  $\text{CH}_3$ );  $^{13}\text{C}$  NMR (75 MHz,  $\text{CDCl}_3$ )  $\delta$  196.1, 137.9, 134.1, 133.7, 129.6, 128.0, 121.2, 65.4, 31.5, 26.9, 23.1, 21.1, 13.9; IR (neat)  $\nu$  ( $\text{cm}^{-1}$ ) 3024, 2957, 2930, 2871, 2718, 1729, 1619, 1510, 1466, 1412, 1376, 1160, 1093, 1019; MS (70 eV, EI)  $m/z$  (%): 296 ( $\text{M}^+(\text{}^{81}\text{Br})$ , 1.55), 294 ( $\text{M}^+(\text{}^{79}\text{Br})$ , 1.68), 143 (100).

**Part 3.** Synthesis of optically active product *R*-**3a~3n**, *S*-**3o** and *R*-**3p~3q**

1. Synthesis of (+)-3-bromo-2-butyl-2-(4-methoxyphenyl)-3-butenal *R*-**3a** (gbj-8-170)



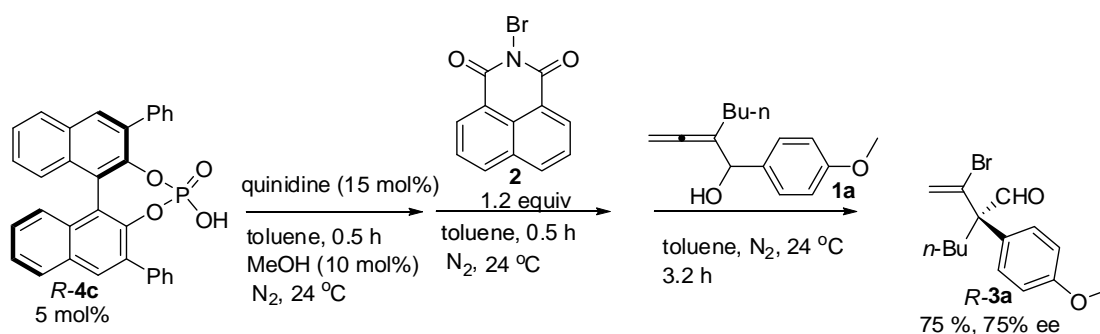

**Typical procedure II:** To a dried 50 mL rubber-capped round bottomed Schlenk vessel were added quinidine (24.5 mg, 0.075 mmol), *R*-**4c** (12.5 mg, 0.025 mmol), MeOH (2.0  $\mu$ L, 0.05 mmol), and 5 mL of toluene. After being stirred at 24 °C for 0.5 h, *N*-bromo-1,8-naphthalimide **2** (165.5 mg, 0.6 mmol) was added and the resulting mixture was stirred at 24 °C for another 0.5 h, which was followed by the sequential addition of allenol **1a** (116.5 mg, 0.5 mmol) and 5 mL of toluene. The resulting mixture was stirred at 24 °C until the reaction was complete as monitored by TLC after 3.2 h. A saturated aqueous solution of Na<sub>2</sub>S<sub>2</sub>O<sub>3</sub> (4 mL) and 10 mL of H<sub>2</sub>O were added to quench the reaction. This resulting mixture was extracted with diethyl ether (3 $\times$ 15 mL), washed with a saturated aqueous solution of NaCl and dried over anhydrous Na<sub>2</sub>SO<sub>4</sub>. Filtration, evaporation and purification by chromatography (petroleum ether/ethyl acetate = 50/1) on silica gel afforded *R*-**3a** (117.5 mg, 75%, 75% ee, HPLC conditions: OJ-H column, *n*-hexane/*i*-PrOH = 80/20, 1.2 mL/min,  $\lambda$  = 230 nm,  $t_R$  (major) = 8.5 min,  $t_R$  (minor) = 15.3 min) as a liquid:  $[\alpha]_D^{20} = +76.6^\circ$  ( $c = 1.00$ , CHCl<sub>3</sub>); <sup>1</sup>H NMR (300 MHz, CDCl<sub>3</sub>)  $\delta$  9.60 (s, 1H, CHO), 7.24 (d,  $J = 8.7$  Hz, 2H, ArH), 6.92 (d,  $J = 8.7$  Hz, 2H, ArH), 6.02 (d,  $J = 2.4$  Hz, 1H, =CH), 5.94 (d,  $J = 2.4$  Hz, 1H, =CH), 3.81 (s, 3H, OCH<sub>3</sub>), 2.29-2.13 (m, 1H, one proton of CH<sub>2</sub>), 2.13-1.97 (m, 1H, one proton of CH<sub>2</sub>), 1.50-1.08 (m, 4H, 2 $\times$ CH<sub>2</sub>), 0.94 (t,  $J = 7.4$  Hz,

3H, CH<sub>3</sub>); <sup>13</sup>C NMR (75 MHz, CDCl<sub>3</sub>) δ 195.8, 159.2, 134.3, 129.3, 128.6, 121.1, 114.2, 65.0, 55.2, 31.4, 26.9, 23.1, 13.9; IR (neat) ν (cm<sup>-1</sup>) 2957, 2933, 2871, 2837, 2719, 1728, 1607, 1580, 1511, 1464, 1442, 1417, 1380, 1298, 1254, 1184, 1094, 1037; MS (70 eV, EI) *m/z* (%): 312 (M<sup>+</sup>(<sup>81</sup>Br), 3.45), 310 (M<sup>+</sup>(<sup>79</sup>Br), 3.31), 160 (100); HRMS calcd for C<sub>15</sub>H<sub>19</sub>O<sub>2</sub><sup>79</sup>Br (M<sup>+</sup>): 310.0568. Found: 310.0565.

The following compounds (*R*-**3b**~**3n**, *S*-**3o** and *R*-**3p**~**3q**) were prepared according to **Typical Procedure II**.

## 2. Synthesis of (+)-3-bromo-2-ethyl-2-(4-methoxyphenyl)-3-butenal *R*-**3b** (gbj-8-182)

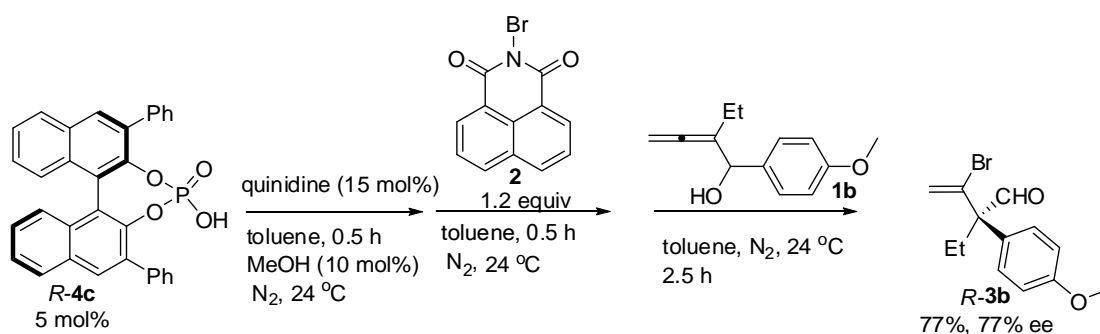

The reaction of quinidine (24.5 mg, 0.075 mmol), *R*-**4c** (12.4 mg, 0.025 mmol), MeOH (2.0 μL, 0.05 mmol), **2** (165.5 mg, 0.6 mmol), and allenol **1b** (101.1 mg, 0.5 mmol) in 10 mL of toluene at 24 °C for 2.5 h afforded *R*-**3b** (107.9 mg, 77%, 77% ee, HPLC conditions: OJ-H column, *n*-hexane/*i*-PrOH = 80/20, 1.2 mL/min, λ = 230 nm, *t*<sub>R</sub> (major) = 22.7 min, *t*<sub>R</sub> (minor) = 19.1 min) as a liquid: [α]<sub>D</sub><sup>20</sup> = +94.5 ° (*c* = 1.00, CHCl<sub>3</sub>); <sup>1</sup>H NMR (300 MHz, CDCl<sub>3</sub>) δ 9.60 (s, 1H, CHO), 7.25 (d, *J* = 9.0 Hz, 2H, ArH), 6.93 (d, *J* = 8.7 Hz, 2H, ArH), 6.02 (d, *J* = 2.7 Hz, 1H, =CH), 5.96 (d, *J* = 2.7 Hz, 1H, =CH), 3.81 (s, 3H, OCH<sub>3</sub>), 2.42-2.22 (m, 1H, one proton of CH<sub>2</sub>), 2.20-2.02 (m, 1H, one proton of CH<sub>2</sub>), 0.93 (t, *J* = 7.4 Hz, 3H, CH<sub>3</sub>); <sup>13</sup>C NMR (75 MHz, CDCl<sub>3</sub>) δ 195.7, 159.2, 133.9, 129.4, 128.4, 121.4, 114.2, 65.5, 55.2, 24.5, 9.2; IR (neat) ν

( $\text{cm}^{-1}$ ) 2971, 2936, 2881, 2836, 2723, 1728, 1608, 1580, 1511, 1462, 1442, 1416, 1383, 1299, 1255, 1185, 1153, 1086, 1034; MS (70 eV, EI)  $m/z$  (%): 284 ( $\text{M}^+(\text{}^{81}\text{Br})$ , 2.68), 282 ( $\text{M}^+(\text{}^{79}\text{Br})$ , 2.53), 174 (100); HRMS calcd for  $\text{C}_{13}\text{H}_{15}\text{O}_2\text{}^{79}\text{Br}$  ( $\text{M}^+$ ): 282.0255. Found: 282.0259.

### 3. Synthesis of (+)-3-bromo-2-propyl-2-(4-methoxyphenyl)-3-butenal **R-3c** (gbj-8-180)

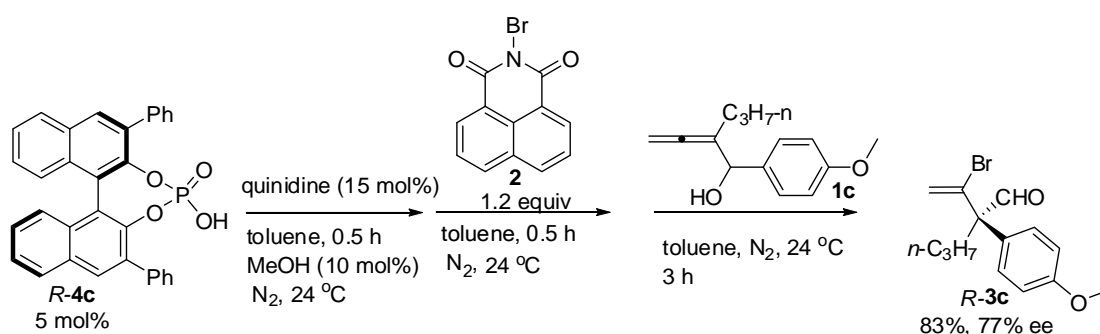

The reaction of quinidine (24.2 mg, 0.075 mmol), **R-4c** (12.6 mg, 0.025 mmol), MeOH (2.0  $\mu\text{L}$ , 0.05 mmol), **2** (165.5 mg, 0.6 mmol), and allenol **1c** (109.5 mg, 0.5 mmol) in 10 mL of toluene at 24 °C for 3 h afforded **R-3c** (124.4 mg, 83%, 77% ee, HPLC conditions: OJ-H column, *n*-hexane/*i*-PrOH = 80/20, 1.2 mL/min,  $\lambda = 230$  nm,  $t_{\text{R}}$  (major) = 8.7 min,  $t_{\text{R}}$  (minor) = 12.8 min) as a liquid:  $[\alpha]_{\text{D}}^{20} = +82.9^\circ$  ( $c = 1.00$ ,  $\text{CHCl}_3$ );  $^1\text{H}$  NMR (300 MHz,  $\text{CDCl}_3$ )  $\delta$  9.60 (s, 1H, CHO), 7.24 (d,  $J = 9.3$  Hz, 2H, ArH), 6.93 (d,  $J = 9.0$  Hz, 2H, ArH), 6.01 (d,  $J = 2.4$  Hz, 1H, =CH), 5.93 (d,  $J = 2.7$  Hz, 1H, =CH), 3.80 (s, 3H,  $\text{OCH}_3$ ), 2.28-2.12 (m, 1H, one proton of  $\text{CH}_2$ ), 2.03 (td,  $J = 12.5$  Hz and 5.0 Hz, 1H, one proton of  $\text{CH}_2$ ), 1.42-1.13 (m, 2H,  $\text{CH}_2$ ), 1.00 (t,  $J = 7.2$  Hz, 3H,  $\text{CH}_3$ );  $^{13}\text{C}$  NMR (75 MHz,  $\text{CDCl}_3$ )  $\delta$  195.7, 159.2, 134.2, 129.3, 128.5, 121.0, 114.2, 65.1, 55.2, 33.8, 18.2, 14.5; IR (neat)  $\nu$  ( $\text{cm}^{-1}$ ) 2994, 2960, 2933, 2873,

2836, 2719, 1726, 1608, 1580, 1511, 1464, 1442, 1417, 1302, 1255, 1184, 1090, 1035;  
 MS (70 eV, ESI)  $m/z$ : 501  $[M(^{81}\text{Br}) + \text{Na}]^+$ , 499  $[M(^{79}\text{Br}) + \text{Na}]^+$ , 479  $[M(^{81}\text{Br}) + \text{H}]^+$ ,  
 477  $[M(^{79}\text{Br}) + \text{H}]^+$ ; HRMS calcd for  $\text{C}_{14}\text{H}_{17}\text{O}_2^{79}\text{Br}$  ( $\text{M}^+$ ): 296.0412. Found:  
 296.0409.

### Synthesis of *R*-3c in 98% ee:

(1) A gram scale reaction of *R*-3c (gbj-10-17)

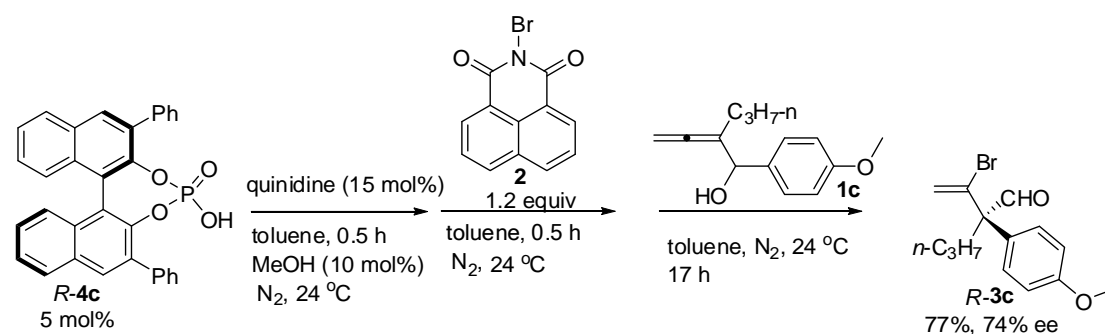

The reaction of quinidine (243.3 mg, 0.75 mmol), *R*-4c (125.1 mg, 0.25 mmol), MeOH (16.1 mg, 0.5 mmol), **2** (1.6562 g, 6 mmol), and allenol **1c** (1.0908 g, 5 mmol) in 100 mL of toluene at 24 °C for 17 h afforded *R*-3c (1.1428 g, 77%, 74% ee, HPLC conditions: OJ-H column, *n*-hexane/*i*-PrOH = 80/20, 1.2 mL/min,  $\lambda = 230$  nm,  $t_R$  (major) = 7.3 min,  $t_R$  (minor) = 9.7 min) as a liquid: <sup>1</sup>H NMR (300 MHz, CDCl<sub>3</sub>)  $\delta$  9.61 (s, 1H, CHO), 7.24 (d,  $J = 9.0$  Hz, 2H, ArH), 6.92 (d,  $J = 9.0$  Hz, 2H, ArH), 6.01 (d,  $J = 2.4$  Hz, 1H, =CH), 5.93 (d,  $J = 2.7$  Hz, 1H, =CH), 3.80 (s, 3H, OCH<sub>3</sub>), 2.27-2.12 (m, 1H, one proton of CH<sub>2</sub>), 2.04 (td,  $J = 12.6$  Hz and 4.8 Hz, 1H, one proton of CH<sub>2</sub>), 1.45-1.13 (m, 2H, CH<sub>2</sub>), 1.00 (t,  $J = 7.1$  Hz, 3H, CH<sub>3</sub>); <sup>13</sup>C NMR (75 MHz, CDCl<sub>3</sub>)  $\delta$  195.8, 159.2, 134.3, 129.3, 128.6, 121.0, 114.3, 65.1, 55.2, 34.0, 18.2, 14.5.

(2) Synthesis of hydrazone *R*-5c (gbj-10-23)

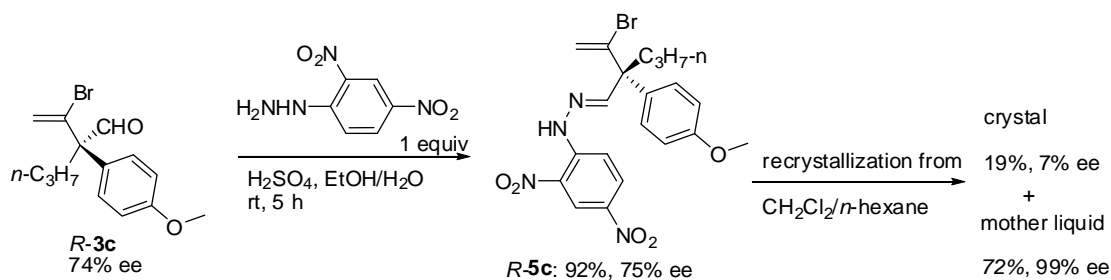

To a 100 mL round bottomed flask were added 2,4-dinitrophenylhydrazine (198.2 mg, 1 mmol) and concentrated  $\text{H}_2\text{SO}_4$  (1.5 mL). After dissolution of hydrazine, EtOH (15 mL),  $\text{H}_2\text{O}$  (35 mL),  $R\text{-}3\mathbf{c}$  (297.0 mg, 1 mmol, 74% ee), and EtOH (5 mL) were added with stirring and the resulting mixture was stirred at rt until the reaction was complete after 5 h as monitored by TLC. This resulting mixture was extracted with ethyl acetate (3×30 mL), washed with a saturated aqueous solution of NaCl and dried over anhydrous  $\text{Na}_2\text{SO}_4$ . Filtration, evaporation and purification by chromatography (petroleum ether/ethyl acetate = 10/1) on silica gel afforded  $R\text{-}5\mathbf{c}$  (437.8 mg, 92%, 75% ee). After recrystallization from the solution of  $\text{CH}_2\text{Cl}_2$  and *n*-hexane, the crystal (92.5 mg, 19%, 7% ee) was obtained leaving the mother liquid containing  $R\text{-}5\mathbf{c}$  (345.2 mg, 72%, 99% ee).

$R\text{-}5\mathbf{c}$ : 75% ee (HPLC conditions: OD-H column, *n*-hexane/*i*-PrOH = 95/5, 1.0 mL/min,  $\lambda = 254$  nm,  $t_R$  (major) = 40.6 min,  $t_R$  (minor) = 47.6 min);  $^1\text{H}$  NMR (300 MHz,  $\text{CDCl}_3$ )  $\delta$  11.11 (s, 1H, NH), 9.15-9.06 (m, 1H, ArH), 8.33 (dd,  $J = 9.6$  Hz and 2.4 Hz, 1H, ArH), 7.86 (d,  $J = 9.6$  Hz, 1H, ArH), 7.75 (s, 1H, N=CH), 7.23 (d,  $J = 8.7$  Hz, 2H, ArH), 6.92 (d,  $J = 9.0$  Hz, 2H, ArH), 5.90 (d,  $J = 2.7$  Hz, 1H, one proton of = $\text{CH}_2$ ), 5.88 (d,  $J = 2.4$  Hz, 1H, one proton of = $\text{CH}_2$ ), 3.82 (s, 3H,  $\text{OCH}_3$ ), 2.27 (t,  $J = 8.3$  Hz, 2H,  $\text{CH}_2$ ), 1.50-1.20 (m, 2H,  $\text{CH}_2$ ), 1.03 (t,  $J = 7.4$  Hz, 3H,  $\text{CH}_3$ );  $^{13}\text{C}$  NMR (75 MHz,  $\text{CDCl}_3$ )  $\delta$  158.8, 152.3, 145.0, 138.2, 137.5, 132.3, 130.1, 129.1, 128.6,

123.3, 120.0, 116.5, 114.0, 57.7, 55.2, 37.3, 18.4, 14.7; IR (neat)  $\nu$  (cm<sup>-1</sup>) 3298, 3107, 2961, 2932, 2872, 2838, 1614, 1590, 1505, 1462, 1426, 1335, 1284, 1254, 1223, 1184, 1139, 1081, 1035; MS (70 eV, ESI)  $m/z$  (%): 501 [M<sup>+</sup>(<sup>81</sup>Br) + Na]<sup>+</sup>, 499 [M<sup>+</sup>(<sup>79</sup>Br) + Na]<sup>+</sup>, 479 [M<sup>+</sup>(<sup>81</sup>Br) + H]<sup>+</sup>, 477 [M<sup>+</sup>(<sup>79</sup>Br) + H]<sup>+</sup>; Elemental analysis calcd for C<sub>20</sub>H<sub>21</sub>BrN<sub>4</sub>O<sub>5</sub>: C, 50.33; H, 4.43; N, 11.74. Found: C, 50.40; H, 4.50; N, 11.35.

**R-5c**: 7% ee (HPLC conditions: OD-H column, *n*-hexane/*i*-PrOH = 95/5, 1.0 mL/min,  $\lambda$  = 254 nm,  $t_R$  (major) = 39.9 min,  $t_R$  (minor) = 45.2 min); Solid, mp. 143.8~145.5 °C; <sup>1</sup>H NMR (300 MHz, CDCl<sub>3</sub>)  $\delta$  11.11 (s, 1H, NH), 9.09 (d,  $J$  = 2.4 Hz, 1H, ArH), 8.32 (dd,  $J$  = 9.6 Hz and 2.4 Hz, 1H, ArH), 7.86 (d,  $J$  = 9.6 Hz, 1H, ArH), 7.77 (s, 1H, N=CH), 7.24 (d,  $J$  = 8.7 Hz, 2H, ArH), 6.91 (d,  $J$  = 8.7 Hz, 2H, ArH), 5.90 (d,  $J$  = 2.4 Hz, 1H, one proton of =CH<sub>2</sub>), 5.88 (d,  $J$  = 2.4 Hz, 1H, one proton of =CH<sub>2</sub>), 3.81 (s, 3H, OCH<sub>3</sub>), 2.28 (t,  $J$  = 8.0 Hz, 2H, CH<sub>2</sub>), 1.52-1.13 (m, 2H, CH<sub>2</sub>), 1.03 (t,  $J$  = 7.2 Hz, 3H, CH<sub>3</sub>); <sup>13</sup>C NMR (75 MHz, CDCl<sub>3</sub>)  $\delta$  158.7, 152.4, 145.0, 138.0, 137.5, 132.3, 130.0, 129.1, 128.5, 123.3, 120.0, 116.4, 113.9, 57.7, 55.2, 37.3, 18.4, 14.6.

**R-5c**: 99% ee (HPLC conditions: OD-H column, *n*-hexane/*i*-PrOH = 95/5, 1.0 mL/min,  $\lambda$  = 254 nm,  $t_R$  (major) = 40.8 min,  $t_R$  (minor) = 48.7 min) [ $\alpha$ ]<sub>D</sub><sup>20</sup> = +58.1 ° ( $c$  = 1.00, CHCl<sub>3</sub>); <sup>1</sup>H NMR (300 MHz, CDCl<sub>3</sub>)  $\delta$  11.10 (s, 1H, NH), 9.10 (d,  $J$  = 2.4 Hz, 1H, ArH), 8.33 (dd,  $J$  = 9.5 Hz and 2.3 Hz, 1H, ArH), 7.86 (d,  $J$  = 9.6 Hz, 1H, ArH), 7.75 (s, 1H, N=CH), 7.23 (d,  $J$  = 8.7 Hz, 2H, ArH), 6.92 (d,  $J$  = 9.0 Hz, 2H, ArH), 5.90 (d,  $J$  = 2.4 Hz, 1H, one proton of =CH<sub>2</sub>), 5.88 (d,  $J$  = 2.7 Hz, 1H, one proton of

=CH<sub>2</sub>), 3.82 (s, 3H, OCH<sub>3</sub>), 2.27 (t, *J* = 8.1 Hz, 2H, CH<sub>2</sub>), 1.55-1.18 (m, 2H, CH<sub>2</sub>), 1.03 (t, *J* = 7.2 Hz, 3H, CH<sub>3</sub>); <sup>13</sup>C NMR (75 MHz, CDCl<sub>3</sub>) δ 158.8, 152.3, 145.0, 138.1, 137.5, 132.3, 130.1, 129.1, 128.6, 123.3, 120.0, 116.5, 114.0, 57.7, 55.2, 37.4, 18.4, 14.7.

(3) Synthesis of hydrazone *rac-5c* (gbj-10-10)

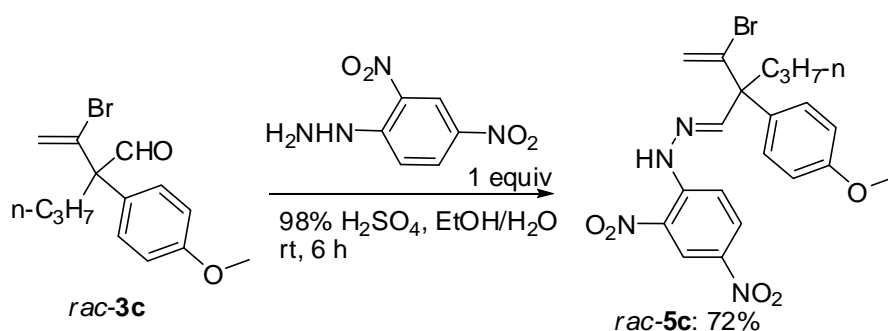

According to the above procedure for the synthesis of *R-5c*, the reaction of 2,4-dinitrophenylhydrazine (198.2 mg, 1 mmol), H<sub>2</sub>SO<sub>4</sub> (98%, 1.5 mL), EtOH (15 mL + 5 mL), H<sub>2</sub>O (35 mL), and *rac-3c* (297.5 mg, 1 mmol) at rt for 6 h afforded *rac-5c* (344.4 mg, 72%): Solid, mp. 145.6~146.8 °C; <sup>1</sup>H NMR (300 MHz, CDCl<sub>3</sub>) δ 11.11 (s, 1H, NH), 9.09 (d, *J* = 2.4 Hz, 1H, ArH), 8.32 (dd, *J* = 9.6 Hz and 2.1 Hz, 1H, ArH), 7.86 (d, *J* = 9.6 Hz, 1H, ArH), 7.76 (s, 1H, N=CH), 7.24 (d, *J* = 8.4 Hz, 2H, ArH), 6.91 (d, *J* = 8.4 Hz, 2H, ArH), 5.90 (s, 1H, one proton of =CH<sub>2</sub>), 5.88 (s, 1H, one proton of =CH<sub>2</sub>), 3.82 (s, 3H, OCH<sub>3</sub>), 2.28 (t, *J* = 8.0 Hz, 2H, CH<sub>2</sub>), 1.52-1.18 (m, 2H, CH<sub>2</sub>), 1.03 (t, *J* = 7.2 Hz, 3H, CH<sub>3</sub>); <sup>13</sup>C NMR (75 MHz, CDCl<sub>3</sub>) δ 158.7, 152.3, 145.0, 138.1, 137.5, 132.3, 130.1, 129.1, 128.6, 123.3, 120.0, 116.4, 114.0, 57.7, 55.2, 37.3, 18.4, 14.7; IR (KBr) ν (cm<sup>-1</sup>) 3308, 3110, 3003, 2957, 2927, 2865, 2838, 1618, 1590, 1511, 1421, 1332, 1249, 1218, 1185, 1134, 1073, 1053, 1029; MS (70 eV, ESI) *m/z*: 501 [M(<sup>81</sup>Br) + Na]<sup>+</sup>, 499 [M(<sup>79</sup>Br) + Na]<sup>+</sup>, 479 [M(<sup>81</sup>Br) + H]<sup>+</sup>, 477 [M(<sup>79</sup>Br) +

H]<sup>+</sup>; Elemental analysis calcd for C<sub>20</sub>H<sub>21</sub>BrN<sub>4</sub>O<sub>5</sub>: C, 50.33; H, 4.43; N, 11.74. Found: C, 50.56; H, 4.53; N, 11.50.

(4) The hydrolysis of hydrazone *R*-**5c** to form *R*-**3c** (gbj-10-53)

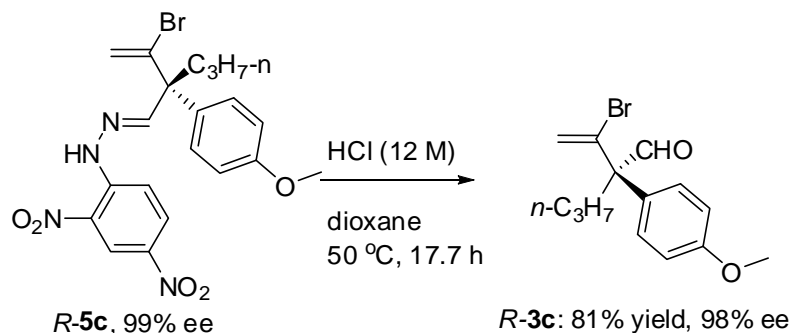

To a round bottomed flask were added *R*-**5c** (238.1 mg, 0.5 mmol), 10 mL of dioxane, and 5 mL of HCl (12 M). The resulting mixture was stirred at 50 °C until the reaction was complete after 17.7 h as monitored by TLC. After the reaction mixture cooled to rt, a saturated aqueous solution of NaHCO<sub>3</sub> was added to quench the reaction. This mixture was extracted with ethyl acetate (3×15 mL), washed with a saturated aqueous solution of NaCl and dried over anhydrous Na<sub>2</sub>SO<sub>4</sub>. Filtration, evaporation and purification by chromatography (petroleum ether/ethyl acetate = 50/1) on silica gel afforded *R*-**3c** (120.7 mg, 81%, 98% ee, HPLC conditions: OJ-H column, *n*-hexane/*i*-PrOH = 80/20, 1.2 mL/min, λ = 230 nm, *t*<sub>R</sub> (major) = 7.6 min, *t*<sub>R</sub> (minor) = 10.3 min) as a liquid: [α]<sub>D</sub><sup>20</sup> = +108.1 ° (*c* = 1.00, CHCl<sub>3</sub>); <sup>1</sup>H NMR (300 MHz, CDCl<sub>3</sub>) δ 9.60 (s, 1H, CHO), 7.24 (d, *J* = 9.0 Hz, 2H, ArH), 6.92 (d, *J* = 9.0 Hz, 2H, ArH), 6.01 (d, *J* = 2.7 Hz, 1H, one proton of =CH<sub>2</sub>), 5.93 (d, *J* = 2.7 Hz, 1H, one proton of =CH<sub>2</sub>), 3.80 (s, 3H, OCH<sub>3</sub>), 2.27-2.12 (m, 1H, one proton of CH<sub>2</sub>), 2.04 (td, *J* = 12.6 Hz and 4.8 Hz, 1H, one proton of CH<sub>2</sub>), 1.45-1.14 (m, 2H, CH<sub>2</sub>), 1.00 (t, *J* = 7.2 Hz,



3H, CH<sub>3</sub>); <sup>13</sup>C NMR (75 MHz, CDCl<sub>3</sub>) δ 195.8, 159.2, 134.3, 129.3, 128.6, 121.0, 114.2, 65.1, 55.2, 33.9, 18.2, 14.4.

4. Synthesis of (+)-3-bromo-2-pentyl-2-(4-methoxyphenyl)-3-butenal **R-3d** (Gbj-8-177)

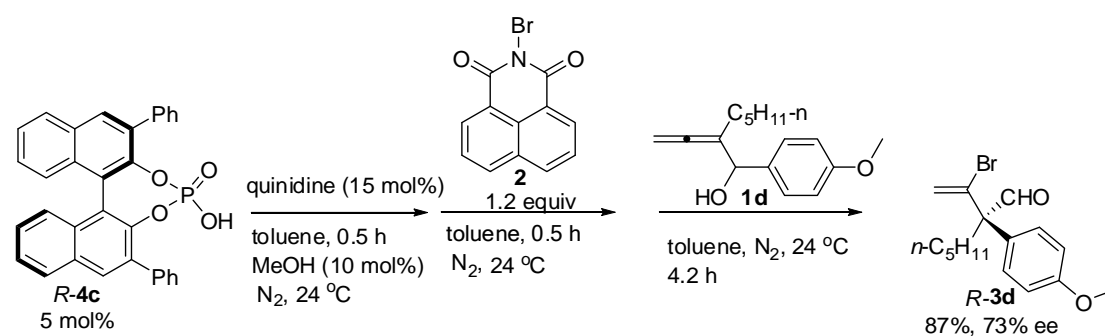

The reaction of quinidine (24.4 mg, 0.075 mmol), **R-4c** (12.5 mg, 0.025 mmol), MeOH (2.0 μL, 0.05 mmol), **2** (165.3 mg, 0.6 mmol), and allenol **1d** (123.2 mg, 0.5 mmol) in 10 mL of toluene at 24 °C for 4.2 h afforded **R-3d** (142.5 mg, 87%, 73% ee, HPLC conditions: OJ-H column, *n*-hexane/*i*-PrOH = 80/20, 1.2 mL/min, λ = 230 nm, *t*<sub>R</sub> (major) = 8.8 min, *t*<sub>R</sub> (minor) = 13.7 min) as a liquid: [α]<sub>D</sub><sup>20</sup> = +72.3 ° (*c* = 1.00, CHCl<sub>3</sub>); <sup>1</sup>H NMR (300 MHz, CDCl<sub>3</sub>) δ 9.59 (s, 1H, CHO), 7.24 (d, *J* = 8.7 Hz, 2H, ArH), 6.91 (d, *J* = 9.0 Hz, 2H, ArH), 6.01 (d, *J* = 2.4 Hz, 1H, one proton of =CH<sub>2</sub>), 5.92 (d, *J* = 2.7 Hz, 1H, one proton of =CH<sub>2</sub>), 3.79 (s, 3H, OCH<sub>3</sub>), 2.32-2.13 (m, 1H, one proton of CH<sub>2</sub>), 2.13-1.97 (m, 1H, one proton of CH<sub>2</sub>), 1.48-1.06 (m, 6H, 3 × CH<sub>2</sub>), 0.90 (t, *J* = 6.3 Hz, 3H, CH<sub>3</sub>); <sup>13</sup>C NMR (75 MHz, CDCl<sub>3</sub>) δ 195.6, 159.1, 134.3, 129.3, 128.4, 121.0, 114.2, 65.0, 55.1, 32.1, 31.5, 24.4, 22.4, 14.0; IR (neat) ν (cm<sup>-1</sup>) 3003, 2955, 2931, 2870, 2837, 2719, 1728, 1608, 1580, 1511, 1464, 1442, 1417, 1379, 1299, 1255, 1184, 1096, 1036; MS (70 eV, EI) *m/z* (%): 326 (M<sup>+</sup>(<sup>81</sup>Br), 4.52), 324 (M<sup>+</sup>(<sup>79</sup>Br), 4.86), 160 (100); HRMS calcd for C<sub>16</sub>H<sub>21</sub>O<sub>2</sub><sup>79</sup>Br (M<sup>+</sup>): 324.0725.

Found: 324.0732.

5. Synthesis of (+)-3-bromo-2-hexyl-2-(4-methoxyphenyl)-3-butenal *R-3e* (gbj-8-185)

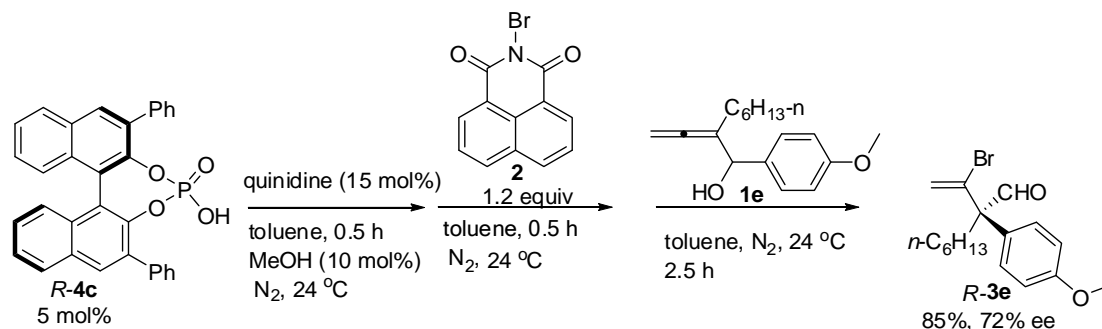

The reaction of quinidine (24.4 mg, 0.075 mmol), *R-4c* (12.5 mg, 0.025 mmol), MeOH (2.0  $\mu$ L, 0.05 mmol), **2** (165.8 mg, 0.6 mmol), and allenol **1e** (130.8 mg, 0.5 mmol) in 10 mL of toluene at 24 °C for 2.5 h afforded *R-3e* (145.4 mg, 85%, 72% ee, HPLC conditions: OJ-H column, *n*-hexane/*i*-PrOH = 80/20, 1.2 mL/min,  $\lambda$  = 230 nm,  $t_R$  (major) = 6.4 min,  $t_R$  (minor) = 8.6 min) as a liquid:  $[\alpha]_D^{20} = +69.6^\circ$  ( $c = 1.00$ , CHCl<sub>3</sub>); <sup>1</sup>H NMR (300 MHz, CDCl<sub>3</sub>)  $\delta$  9.59 (s, 1H, CHO), 7.24 (d,  $J = 9.0$  Hz, 2H, ArH), 6.92 (d,  $J = 9.0$  Hz, 2H, ArH), 6.02 (d,  $J = 2.4$  Hz, 1H, one proton of =CH<sub>2</sub>), 5.93 (d,  $J = 2.7$  Hz, 1H, one proton of =CH<sub>2</sub>), 3.79 (s, 3H, OCH<sub>3</sub>), 2.31-2.14 (m, 1H, one proton of CH<sub>2</sub>), 2.13-1.96 (m, 1H, one proton of CH<sub>2</sub>), 1.48-1.10 (m, 8H, 4  $\times$  CH<sub>2</sub>), 0.89 (t,  $J = 6.5$  Hz, 3H, CH<sub>3</sub>); <sup>13</sup>C NMR (75 MHz, CDCl<sub>3</sub>)  $\delta$  195.7, 159.1, 134.3, 129.3, 128.5, 121.0, 114.2, 65.0, 55.1, 31.6, 31.5, 29.6, 24.7, 22.6, 14.0; IR (neat)  $\nu$  (cm<sup>-1</sup>) 3000, 2954, 2930, 2856, 2719, 1727, 1607, 1580, 1511, 1464, 1442, 1417, 1378, 1299, 1255, 1184, 1144, 1097, 1035; MS (70 eV, EI)  $m/z$  (%): 340 (M<sup>+</sup>(<sup>81</sup>Br), 4.15), 338 (M<sup>+</sup>(<sup>79</sup>Br), 4.55), 160 (100); HRMS calcd for C<sub>17</sub>H<sub>23</sub>O<sub>2</sub><sup>79</sup>Br (M<sup>+</sup>): 338.0881. Found: 338.0877.

6. Synthesis of (+)-3-bromo-2-decyl-2-(4-methoxyphenyl)-3-butenal **R-3f**  
(Gbj-8-175)

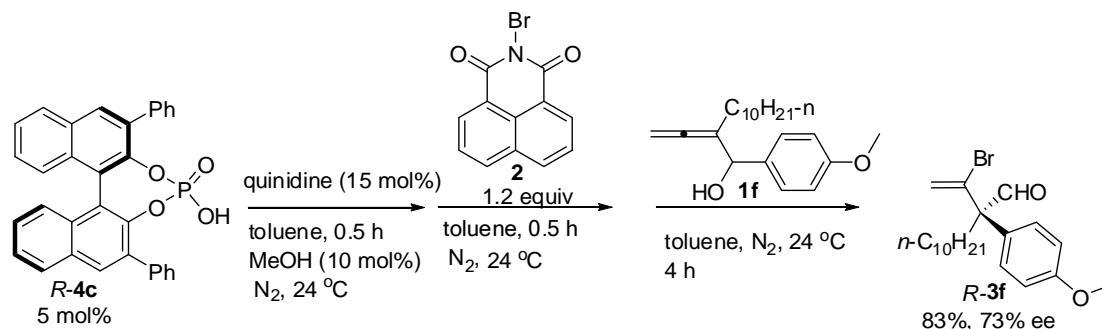

The reaction of quinidine (24.5 mg, 0.075 mmol), **R-4c** (12.4 mg, 0.025 mmol), MeOH (2.0  $\mu$ L, 0.05 mmol), **2** (165.7 mg, 0.6 mmol), and allenol **1f** (158.1 mg, 0.5 mmol) in 10 mL of toluene at 24 °C for 4 h afforded **R-3f** (163.4 mg, 83%, 73% ee, HPLC conditions: OJ-H column, *n*-hexane/*i*-PrOH = 80/20, 1.2 mL/min,  $\lambda$  = 230 nm,  $t_R$  (major) = 5.2 min,  $t_R$  (minor) = 8.7 min) as a liquid:  $[\alpha]_D^{20} = +62.8^\circ$  ( $c = 1.00$ , CHCl<sub>3</sub>); <sup>1</sup>H NMR (300 MHz, CDCl<sub>3</sub>)  $\delta$  9.60 (s, 1H, CHO), 7.24 (d,  $J = 8.7$  Hz, 2H, ArH), 6.92 (d,  $J = 9.0$  Hz, 2H, ArH), 6.02 (d,  $J = 2.7$  Hz, 1H, one proton of =CH<sub>2</sub>), 5.93 (d,  $J = 2.7$  Hz, 1H, one proton of =CH<sub>2</sub>), 3.80 (s, 3H, OCH<sub>3</sub>), 2.28-2.13 (m, 1H, one proton of CH<sub>2</sub>), 2.13-1.96 (m, 1H, one proton of CH<sub>2</sub>), 1.46-1.06 (m, 16H, 8  $\times$  CH<sub>2</sub>), 0.88 (t,  $J = 6.8$  Hz, 3H, CH<sub>3</sub>); <sup>13</sup>C NMR (75 MHz, CDCl<sub>3</sub>)  $\delta$  195.8, 159.2, 134.3, 129.3, 128.6, 121.1, 114.2, 65.1, 55.2, 31.9, 31.7, 30.0, 29.6, 29.4, 29.3, 24.8, 22.7, 14.1; IR (neat)  $\nu$  (cm<sup>-1</sup>) 2997, 2953, 2925, 2853, 2718, 1728, 1608, 1580, 1511, 1464, 1441, 1378, 1299, 1255, 1184, 1142, 1101, 1037; MS (70 eV, EI)  $m/z$  (%): 396 (M<sup>+</sup>(<sup>81</sup>Br), 2.53), 394 (M<sup>+</sup>(<sup>79</sup>Br), 2.92), 160 (100); HRMS calcd for C<sub>21</sub>H<sub>31</sub>O<sub>2</sub><sup>79</sup>Br (M<sup>+</sup>): 394.1507. Found: 394.1516.

7. Synthesis of (+)-3-bromo-2-isopropyl-2-(4-methoxyphenyl)-3-butenal **R-3g**  
(gbj-9-17)

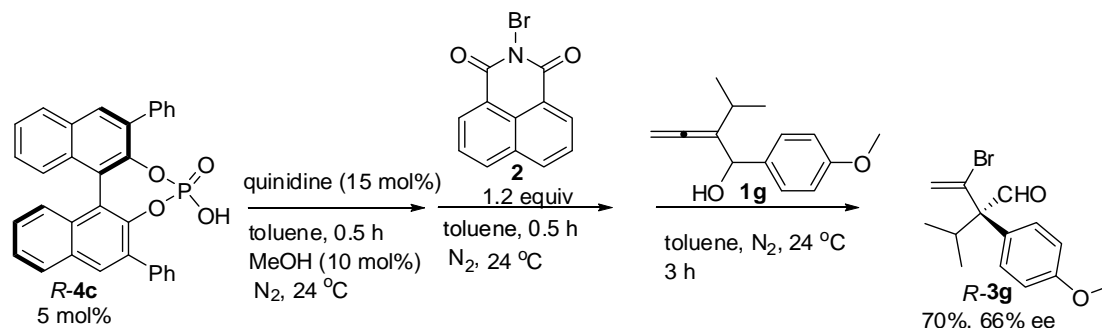

The reaction of quinidine (24.3 mg, 0.075 mmol), **R-4c** (12.6 mg, 0.025 mmol), MeOH (2.0  $\mu$ L, 0.05 mmol), **2** (165.9 mg, 0.6 mmol), and allenol **1g** (109.3 mg, 0.5 mmol) in 10 mL of toluene at 24 °C for 3 h afforded **R-3g** (104.1 mg, 70%, 66% ee, HPLC conditions: OJ-H column, *n*-hexane/*i*-PrOH = 80/20, 1.2 mL/min,  $\lambda$  = 230 nm,  $t_R$  (major) = 25.0 min,  $t_R$  (minor) = 17.9 min) as a liquid:  $[\alpha]_D^{20} = +18.1^\circ$  ( $c = 1.03$ , CHCl<sub>3</sub>); <sup>1</sup>H NMR (300 MHz, CDCl<sub>3</sub>)  $\delta$  9.60 (s, 1H, CHO), 7.17 (d,  $J = 9.0$  Hz, 2H, ArH), 6.93 (d,  $J = 9.0$  Hz, 2H, ArH), 6.01 (d,  $J = 2.4$  Hz, 1H, one proton of =CH<sub>2</sub>), 5.98 (d,  $J = 2.4$  Hz, 1H, one proton of =CH<sub>2</sub>), 3.81 (s, 3H, OCH<sub>3</sub>), 2.91 (heptet,  $J = 6.8$  Hz, 1H, CH), 0.97 (d,  $J = 6.9$  Hz, 3H, CH<sub>3</sub>), 0.92 (d,  $J = 6.6$  Hz, 3H, CH<sub>3</sub>); <sup>13</sup>C NMR (75 MHz, CDCl<sub>3</sub>)  $\delta$  196.7, 158.8, 133.0, 130.7, 127.2, 123.4, 113.6, 69.2, 55.1, 30.4, 18.4, 18.2; IR (neat)  $\nu$  (cm<sup>-1</sup>) 2967, 2936, 2877, 2837, 2720, 1727, 1609, 1579, 1512, 1464, 1442, 1417, 1389, 1370, 1296, 1255, 1186, 1124, 1097, 1074, 1036; MS (70 eV, EI)  $m/z$  (%): 298 (M<sup>+</sup>(<sup>81</sup>Br), 15.75), 296 (M<sup>+</sup>(<sup>79</sup>Br), 14.24), 188 (100); HRMS calcd for C<sub>14</sub>H<sub>17</sub>O<sub>2</sub><sup>79</sup>Br (M<sup>+</sup>): 296.0412. Found: 296.0413.

8. Synthesis of (+)-3-bromo-2-cyclohexyl-2-(4-methoxyphenyl)-3-butenal **R-3h**

(gbj-9-15)

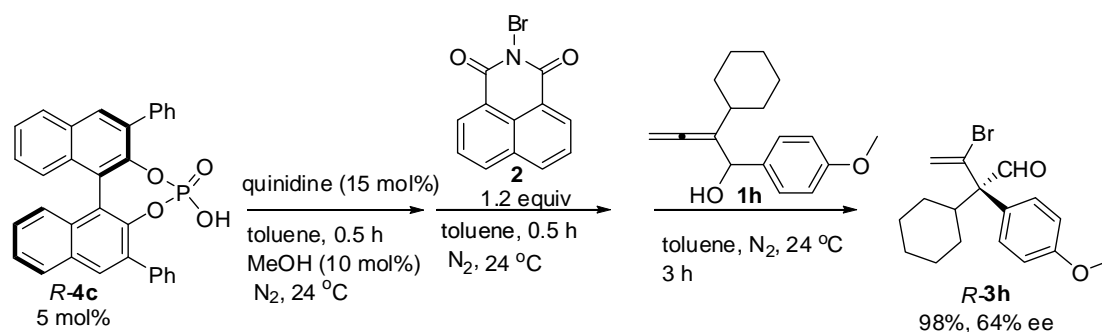

The reaction of quinidine (24.5 mg, 0.075 mmol), *R-4c* (12.6 mg, 0.025 mmol), MeOH (2.0  $\mu$ L, 0.05 mmol), **2** (166.1 mg, 0.6 mmol), and allenol **1h** (129.5 mg, 0.5 mmol) in 10 mL of toluene at 24 °C for 3 h afforded *R-3h* (166.0 mg, 98%, 64% ee, HPLC conditions: OJ-H column, *n*-hexane/*i*-PrOH = 95/5, 0.6 mL/min,  $\lambda$  = 230 nm,  $t_R$  (major) = 18.6 min,  $t_R$  (minor) = 21.7 min) as a liquid:  $[\alpha]_D^{20} = +12.2^\circ$  ( $c = 1.00$ , CHCl<sub>3</sub>); <sup>1</sup>H NMR (300 MHz, CDCl<sub>3</sub>)  $\delta$  9.57 (s, 1H, CHO), 7.14 (d,  $J = 9.3$  Hz, 2H, ArH), 6.92 (d,  $J = 8.7$  Hz, 2H, ArH), 6.00 (d,  $J = 2.1$  Hz, 1H, one proton of =CH<sub>2</sub>), 5.96 (d,  $J = 2.4$  Hz, 1H, one proton of =CH<sub>2</sub>), 3.81 (s, 3H, OCH<sub>3</sub>), 2.51 (t,  $J = 11.9$  Hz, 1H, CH), 1.92-1.52 (m, 5H, 2  $\times$  CH<sub>2</sub> and one proton of CH<sub>2</sub>), 1.48-1.22 (m, 2H, CH<sub>2</sub>), 1.14-0.74 (m, 3H, CH<sub>2</sub> and one proton of CH<sub>2</sub>); <sup>13</sup>C NMR (75 MHz, CDCl<sub>3</sub>)  $\delta$  196.5, 158.7, 133.0, 130.6, 127.4, 123.3, 113.5, 69.2, 55.1, 41.2, 28.8, 28.6, 26.8, 26.7, 26.3; IR (neat)  $\nu$  (cm<sup>-1</sup>) 3000, 2932, 2853, 2714, 1727, 1609, 1579, 1512, 1462, 1453, 1416, 1296, 1255, 1185, 1154, 1123, 1037; MS (70 eV, EI)  $m/z$  (%): 338 (M<sup>+</sup>(<sup>81</sup>Br), 11.50), 336 (M<sup>+</sup>(<sup>79</sup>Br), 12.17), 307 (100); HRMS calcd for C<sub>17</sub>H<sub>21</sub>O<sub>2</sub><sup>79</sup>Br (M<sup>+</sup>): 336.0725. Found: 336.0725.

9. Synthesis of (+)-2-allyl-3-bromo-2-(4-methoxyphenyl)-3-butenal *R-3i* (gbj-8-199)

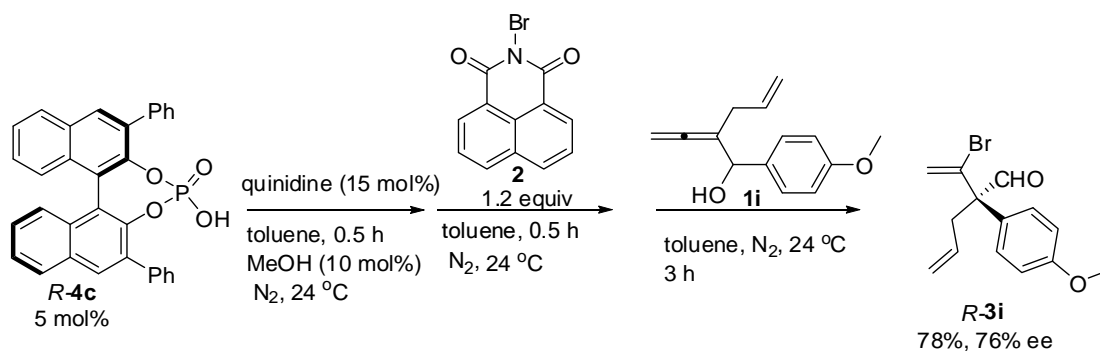

The reaction of quinidine (24.4 mg, 0.075 mmol), **R-4c** (12.5 mg, 0.025 mmol), MeOH (2.0  $\mu$ L, 0.05 mmol), **2** (165.1 mg, 0.6 mmol), and allenol **1i** (107.8 mg, 0.5 mmol) in 10 mL of toluene at 24 °C for 3 h afforded **R-3i** (114.3 mg, 78%, 76% ee, HPLC conditions: OJ-H column, *n*-hexane/*i*-PrOH = 98/2, 1.2 mL/min,  $\lambda$  = 230 nm,  $t_R$  (major) = 25.0 min,  $t_R$  (minor) = 22.9 min) as a liquid:  $[\alpha]_D^{20} = +88.5^\circ$  ( $c = 1.00$ , CHCl<sub>3</sub>); <sup>1</sup>H NMR (300 MHz, CDCl<sub>3</sub>)  $\delta$  9.64 (s, 1H, CHO), 7.24 (d,  $J = 9.0$  Hz, 2H, ArH), 6.93 (d,  $J = 9.0$  Hz, 2H, ArH), 5.94 (d,  $J = 2.7$  Hz, one proton of =CH<sub>2</sub>), 5.92 (d,  $J = 3.0$  Hz, one proton of =CH<sub>2</sub>), 5.82-5.60 (m, 1H, =CH), 5.19 (dd,  $J = 17.0$  Hz and 1.1 Hz, 1H, one proton of =CH<sub>2</sub>), 5.11 (d,  $J = 10.2$  Hz, 1H, one proton of =CH<sub>2</sub>), 3.80 (s, 3H, OCH<sub>3</sub>), 3.05 (dd,  $J = 14.1$  and 6.6 Hz, 1H, one proton of CH<sub>2</sub>), 2.86 (dd,  $J = 14.1$  and 7.5 Hz, 1H, one proton of CH<sub>2</sub>); <sup>13</sup>C NMR (75 MHz, CDCl<sub>3</sub>)  $\delta$  195.7, 159.2, 133.6, 132.7, 129.4, 127.9, 121.5, 118.8, 114.2, 64.7, 55.2, 36.4; IR (neat)  $\nu$  (cm<sup>-1</sup>) 3078, 3036, 3005, 2957, 2935, 2911, 2837, 2720, 1731, 1640, 1608, 1580, 1511, 1463, 1442, 1417, 1299, 1255, 1185, 1098, 1033; MS (70 eV, EI)  $m/z$  (%): 296 (M<sup>+</sup>(<sup>81</sup>Br), 14.66), 294 (M<sup>+</sup>(<sup>79</sup>Br), 16.82), 145 (100); HRMS calcd for C<sub>14</sub>H<sub>15</sub> O<sub>2</sub><sup>79</sup>Br (M<sup>+</sup>): 294.0255. Found: 294.0251.

## 10. Synthesis of (+)-2-benzyl-3-bromo-2-(4-methoxyphenyl)-3-butenal **R-3j**

(gbj-10-77)

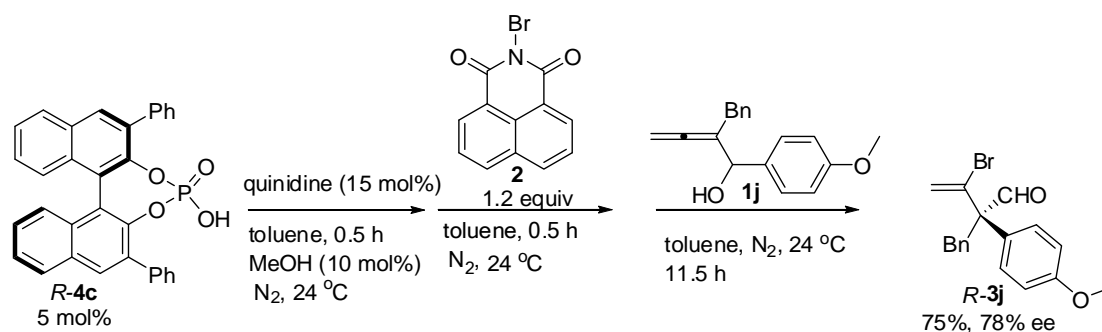

The reaction of quinidine (24.4 mg, 0.075 mmol), *R*-**4c** (12.5 mg, 0.025 mmol), MeOH (2.0  $\mu$ L, 0.05 mmol), **2** (165.4 mg, 0.6 mmol), and allenol **1j** (133.6 mg, 0.5 mmol) in 10 mL of toluene at 24 °C for 11.5 h afforded *R*-**3j** (129.1 mg, 75%, 78% ee, HPLC conditions: AD-H column, *n*-hexane/*i*-PrOH = 80/20, 0.5 mL/min,  $\lambda$  = 230 nm,  $t_R$  (major) = 12.2 min,  $t_R$  (minor) = 10.2 min) as a liquid:  $[\alpha]_D^{20} = +68.6^\circ$  ( $c = 1.00$ , CHCl<sub>3</sub>); <sup>1</sup>H NMR (300 MHz, CDCl<sub>3</sub>)  $\delta$  9.66 (s, 1H, CHO), 7.28-7.04 (m, 7H, ArH), 6.91 (d,  $J = 9.0$  Hz, 2H, ArH), 5.82 (s, 2H, =CH<sub>2</sub>), 3.80 (s, 3H, OCH<sub>3</sub>), 3.64 (d,  $J = 13.2$  Hz, 1H, one proton of ArCH<sub>2</sub>), 3.42 (d,  $J = 13.2$  Hz, 1H, one proton of ArCH<sub>2</sub>); <sup>13</sup>C NMR (75 MHz, CDCl<sub>3</sub>)  $\delta$  195.4, 159.3, 136.2, 133.3, 130.7, 129.6, 128.5, 127.9, 126.7, 122.2, 114.2, 66.7, 55.2, 38.3; IR (neat)  $\nu$  (cm<sup>-1</sup>) 3061, 3032, 3003, 2954, 2931, 2838, 2726, 1723, 1620, 1605, 1581, 1510, 1455, 1443, 1417, 1314, 1293, 1255, 1207, 1184, 1123, 1078, 1032; MS (70 eV, EI)  $m/z$  (%): 346 (M<sup>+</sup>(<sup>81</sup>Br), 12.25), 344 (M<sup>+</sup>(<sup>79</sup>Br), 14.04), 174 (100); HRMS calcd for C<sub>18</sub>H<sub>17</sub>O<sub>2</sub><sup>79</sup>Br (M<sup>+</sup>): 344.0412. Found: 344.0413.

11. Synthesis of (+)-3-bromo-2-(3-phenylpropyl)-2-(4-methoxyphenyl)-3-butenal

*R*-**3k** (gbj-9-6)

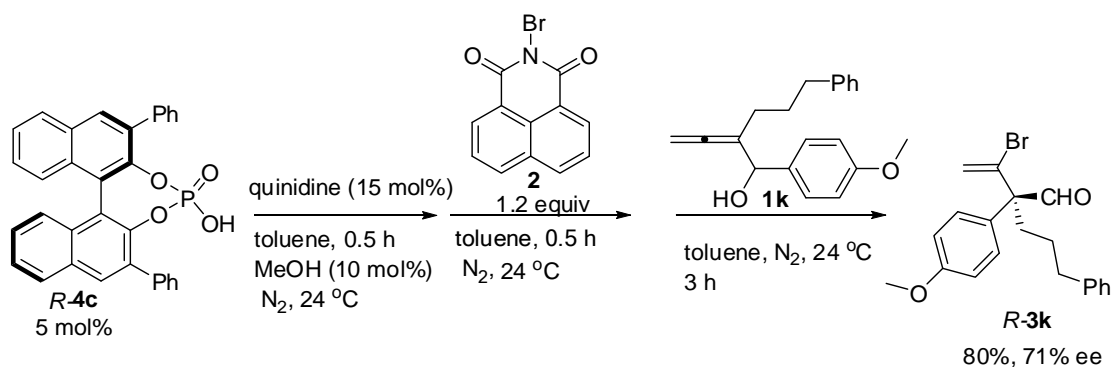

The reaction of quinidine (24.3 mg, 0.075 mmol), **R-4c** (12.6 mg, 0.025 mmol), MeOH (2.0  $\mu$ L, 0.05 mmol), **2** (166.1 mg, 0.6 mmol), and allenol **1k** (147.8 mg, 0.5 mmol) in 10 mL of toluene at 24 °C for 3 h afforded **R-3k** (150.1 mg, 80%, 72% ee, HPLC conditions: OJ-H column, *n*-hexane/*i*-PrOH = 80/20, 1.2 mL/min,  $\lambda$  = 230 nm,  $t_R$  (major) = 17.4 min,  $t_R$  (minor) = 23.2 min;  $[\alpha]_D^{20}$  = +77.5 ° ( $c$  = 1.00, CHCl<sub>3</sub>)). After recrystlization from the solution of CH<sub>2</sub>Cl<sub>2</sub> and *n*-hexane for three times, **R-3k** was obtained in 99% ee (31.2 mg, 17%), HPLC conditions: OJ-H column, *n*-hexane/*i*-PrOH = 80/20, 1.2 mL/min,  $\lambda$  = 230 nm,  $t_R$  (major) = 12.1 min,  $t_R$  (minor) = 15.9 min;  $[\alpha]_D^{20}$  = +110.2 ° ( $c$  = 0.83, CHCl<sub>3</sub>); solid; mp. 84.0~85.1 °C (CH<sub>2</sub>Cl<sub>2</sub>/*n*-hexane); <sup>1</sup>H NMR (300 MHz, CDCl<sub>3</sub>)  $\delta$  9.57 (s, 1H, CHO), 7.38-7.07 (m, 7H, ArH), 6.90 (d,  $J$  = 8.7 Hz, 2H, ArH), 5.94 (d,  $J$  = 2.4 Hz, 1H, one proton of =CH<sub>2</sub>), 5.90 (d,  $J$  = 2.4 Hz, 1H, one proton of =CH<sub>2</sub>), 3.77 (s, 3H, OCH<sub>3</sub>), 2.83-2.57 (m, 2H, CH<sub>2</sub>), 2.37-2.18 (m, 1H, one proton of CH<sub>2</sub>), 2.17-1.98 (m, 1H, one proton of CH<sub>2</sub>), 1.76-1.44 (m, 2H, CH<sub>2</sub>); <sup>13</sup>C NMR (75 MHz, CDCl<sub>3</sub>)  $\delta$  195.5, 159.1, 141.7, 134.0, 129.2, 128.3, 128.23, 128.19, 125.8, 121.2, 114.2, 65.0, 55.1, 36.0, 31.0, 26.5; IR (KBr)  $\nu$  (cm<sup>-1</sup>) 3081, 3061, 3026, 3002, 2953, 2935, 2837, 2721, 1727, 1606, 1581, 1511, 1454, 1417, 1299, 1256, 1185, 1122, 1082, 1034; MS (70 eV, EI)  $m/z$  (%): 374 (M<sup>+</sup>(<sup>81</sup>Br), 2.37), 372 (M<sup>+</sup>(<sup>79</sup>Br), 2.31), 160 (100); Anal. calcd. for C<sub>20</sub>H<sub>21</sub>O<sub>2</sub>Br: C



64.35, H 5.67; found: C 64.62, H 5.71. The absolute configuration of **3k** was determined by the X-ray diffraction study (Figure 1).

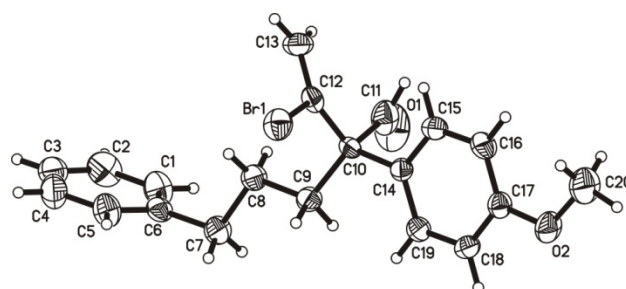

Figure 1. ORTEP Representation of *R*-**3k**

Synthesis of *R*-**3k** on a 3 mmol scale (gbj-11-4)

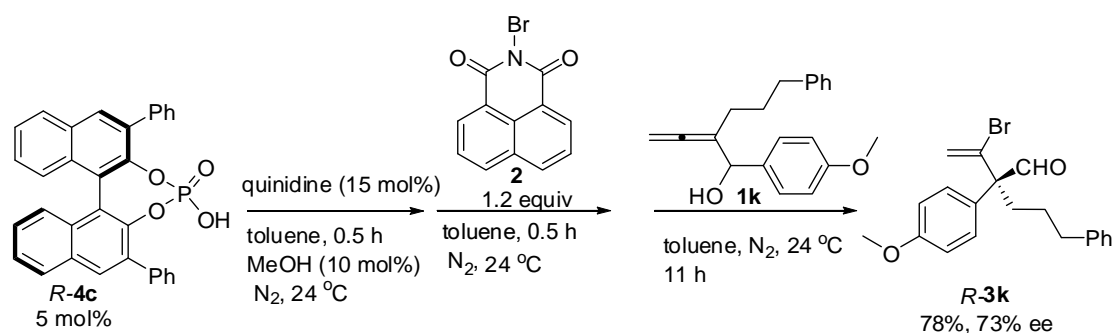

The reaction of quinidine (145.5 mg, 0.45 mmol), *R*-**4c** (75.1 mg, 0.15 mmol), MeOH (12.5  $\mu$ L, 0.3 mmol), **2** (993.2 mg, 3.6 mmol), and allenol **1k** (882.5 mg, 3.0 mmol) in 60 mL of toluene at 24 °C for 11 h afforded *R*-**3k** (872.2 mg, 78%, 73% ee, HPLC conditions: OJ-H column, *n*-hexane/*i*-PrOH = 80/20, 1.2 mL/min,  $\lambda$  = 230 nm,  $t_R$  (major) = 13.0 min,  $t_R$  (minor) = 16.4 min). Recrystallization from the solution of  $\text{CH}_2\text{Cl}_2$  and *n*-hexane for twice afforded *R*-**3k** (451.3 mg, 40% in total yield) with 94% ee (HPLC conditions: OJ-H column, *n*-hexane/*i*-PrOH = 80/20, 1.2 mL/min,  $\lambda$  = 230 nm,  $t_R$  (major) = 13.6 min,  $t_R$  (minor) = 17.6 min));  $[\alpha]_D^{20} = +105.1^\circ$  ( $c = 1.00$ ,  $\text{CHCl}_3$ ); solid; mp. 82.7~83.9 °C ( $\text{CH}_2\text{Cl}_2$ /*n*-hexane);  $^1\text{H}$  NMR (300 MHz,  $\text{CDCl}_3$ )  $\delta$  9.58 (s, 1H, CHO), 7.38-7.23 (m, 2H, ArH), 7.23-7.08 (m, 5H, ArH), 6.89 (d,  $J = 8.7$  Hz, 2H, ArH), 5.95 (d,  $J = 2.7$  Hz, 1H, one proton of = $\text{CH}_2$ ), 5.90 (d,  $J = 2.7$  Hz, 1H,

one proton of =CH<sub>2</sub>), 3.78 (s, 3H, OCH<sub>3</sub>), 2.82-2.58 (m, 2H, CH<sub>2</sub>), 2.34-2.18 (m, 1H, one proton of CH<sub>2</sub>), 2.17-2.02 (m, 1H, one proton of CH<sub>2</sub>), 1.74-1.46 (m, 2H, CH<sub>2</sub>); <sup>13</sup>C NMR (75 MHz, CDCl<sub>3</sub>) δ 195.6, 159.2, 141.7, 134.1, 129.3, 128.41, 128.36, 128.29, 125.8, 121.2, 114.3, 65.1, 55.2, 36.1, 31.3, 26.5.

12. Synthesis of (+)-3-bromo-2-phenyl-2-(4-ethoxyphenyl)-3-butenal **R-3I**  
(gbj-11-192)

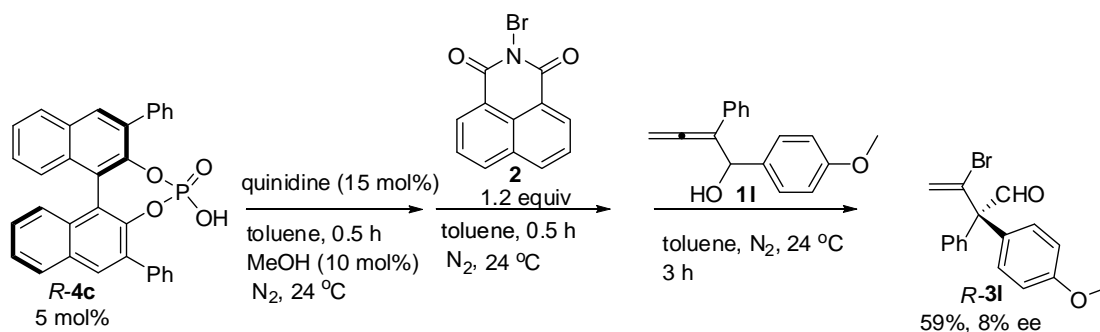

The reaction of quinidine (9.8 mg, 0.03 mmol), **R-4c** (5.0 mg, 0.01 mmol), MeOH (0.8 μL, 0.02 mmol), **2** (66.0 mg, 0.24 mmol), and allenol **11** (50.0 mg, 0.2 mmol) in 4 mL of toluene at 24 °C for 3 h afforded **R-3I** (38.7 mg, 59%, 8% ee, HPLC conditions: AS-H column, *n*-hexane/*i*-PrOH = 80/20, 1.0 mL/min, λ = 230 nm, *t*<sub>R</sub> (major) = 6.1 min, *t*<sub>R</sub> (minor) = 5.5 min) as a liquid; [α]<sub>D</sub><sup>20</sup> = +0.2 ° (*c* = 0.86, CHCl<sub>3</sub>); <sup>1</sup>H NMR (300 MHz, CDCl<sub>3</sub>) δ 10.12 (s, 1H, CHO), 7.45-7.32 (m, 3H, ArH), 7.27-7.19 (m, 2H, ArH), 7.16-7.08 (m, 2H, ArH), 6.95-6.87 (m, 2H, ArH), 6.00 (d, *J* = 2.4 Hz, 1H, one proton of =CH<sub>2</sub>), 5.69 (d, *J* = 2.4 Hz, 1H, one proton of =CH<sub>2</sub>), 3.82 (s, 3H, CH<sub>3</sub>); <sup>13</sup>C NMR (75 MHz, CDCl<sub>3</sub>) δ 196.3, 159.1, 137.2, 133.3, 131.4, 130.1, 128.6, 128.5, 128.0, 124.4, 113.9, 70.9, 55.3; IR (neat) ν (cm<sup>-1</sup>) 3059, 3033, 3002, 2959, 2930, 2838, 2729, 1732, 1608, 1580, 1505, 1462, 1446, 1417, 1299, 1256, 1185, 1116, 1088, 1035;

MS (70 eV, EI)  $m/z$  (%): 332 ( $M^+(\text{}^{81}\text{Br})$ , 1.90), 330 ( $M^+(\text{}^{79}\text{Br})$ , 1.89), 303 ( $M^+(\text{}^{81}\text{Br})\text{-CHO}$ , 37.15), 301 ( $M^+(\text{}^{79}\text{Br})\text{-CHO}$ , 36.80), 222 (100); HRMS calcd for  $\text{C}_{17}\text{H}_{15}\text{O}_2\text{}^{79}\text{Br}$  ( $M^+$ ): 330.0255. Found: 330.0261.

13. Synthesis of (+)-3-bromo-2-butyl-2-(4-ethoxyphenyl)-3-butenal *R-3m* (gbj-9-30)

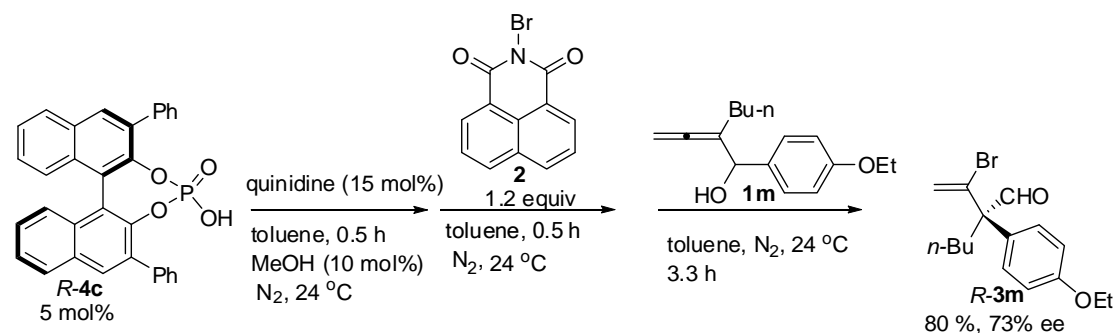

The reaction of quinidine (24.5 mg, 0.075 mmol), *R-4c* (12.6 mg, 0.025 mmol), MeOH (2.0  $\mu\text{L}$ , 0.05 mmol), **2** (166.1 mg, 0.6 mmol), and allenol **1m** (122.3 mg, 0.5 mmol) in 10 mL of toluene at 24 °C for 3.3 h afforded *R-3m* (129.9 mg, 80%, 73% ee, HPLC conditions: OJ-H column, *n*-hexane/*i*-PrOH = 80/20, 1.2 mL/min,  $\lambda = 230$  nm,  $t_R$  (major) = 5.2 min,  $t_R$  (minor) = 6.0 min) as a liquid;  $[\alpha]_{\text{D}}^{20} = +79.3^\circ$  ( $c = 1.00$ ,  $\text{CHCl}_3$ );  $^1\text{H}$  NMR (300 MHz,  $\text{CDCl}_3$ )  $\delta$  9.60 (s, 1H, CHO), 7.23 (d,  $J = 9.0$  Hz, 2H, ArH), 6.91 (d,  $J = 9.0$  Hz, 2H, ArH), 6.02 (d,  $J = 2.7$  Hz, 1H, one proton of  $=\text{CH}_2$ ), 5.93 (d,  $J = 2.7$  Hz, 1H, one proton of  $=\text{CH}_2$ ), 4.02 (q,  $J = 7.0$  Hz, 2H,  $\text{CH}_2$ ), 2.30-2.13 (m, 1H, one proton of  $\text{CH}_2$ ), 2.13-1.94 (m, 1H, one proton of  $\text{CH}_2$ ), 1.52-1.08 (m, 7H,  $\text{CH}_3$  and  $2 \times \text{CH}_2$ ), 0.93 (t,  $J = 7.2$  Hz, 3H,  $\text{CH}_3$ );  $^{13}\text{C}$  NMR (75 MHz,  $\text{CDCl}_3$ )  $\delta$  195.7, 158.6, 134.3, 129.3, 128.3, 121.0, 114.7, 65.0, 63.4, 31.4, 26.9, 23.1, 14.8, 13.9; IR (neat)  $\nu$  ( $\text{cm}^{-1}$ ) 2957, 2931, 2872, 2822, 2719, 1727, 1608, 1580, 1511, 1477, 1393, 1296, 1253, 1185, 1117, 1093, 1047, 1011; MS (70 eV, EI)  $m/z$  (%): 326 ( $M^+(\text{}^{81}\text{Br})$ ),

4.80), 324 ( $M^+(^{79}\text{Br})$ , 2.90), 174 (100); HRMS calcd for  $\text{C}_{16}\text{H}_{21}\text{O}_2^{79}\text{Br}$  ( $M^+$ ): 324.0725.

Found: 324.0728.

#### 14. Synthesis of (+)-3-bromo-2-butyl-2-(3,4-methylenedioxyphenyl)-3-butenal *R-3n*

(gbj-8-191)

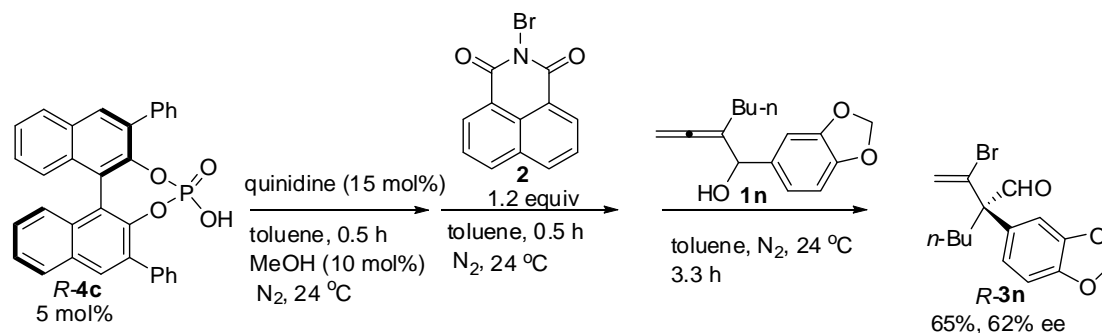

The reaction of quinidine (24.6 mg, 0.075 mmol), *R-4c* (12.6 mg, 0.025 mmol), MeOH (2.0  $\mu\text{L}$ , 0.05 mmol), **2** (165.8 mg, 0.6 mmol), and allenol **1n** (123.8 mg, 0.5 mmol) in 10 mL of toluene at 24 °C for 3.3 h afforded *R-3n* (105.6 mg, 65%, 62% ee, HPLC conditions: OJ-H column, *n*-hexane/*i*-PrOH = 80/20, 1.2 mL/min,  $\lambda = 230$  nm,  $t_R$  (major) = 6.0 min,  $t_R$  (minor) = 8.3 min) as a liquid:  $[\alpha]_D^{20} = +61.6^\circ$  ( $c = 1.00$ ,  $\text{CHCl}_3$ );  $^1\text{H}$  NMR (300 MHz,  $\text{CDCl}_3$ )  $\delta$  9.59 (s, 1H, CHO), 6.88-6.74 (m, 3H, ArH), 6.04 (d,  $J = 2.7$  Hz, 1H, one proton of  $=\text{CH}_2$ ), 5.99 (s, 2H,  $\text{OCH}_2\text{O}$ ), 5.94 (d,  $J = 3.0$  Hz, 1H, one proton of  $=\text{CH}_2$ ), 2.24-2.10 (m, 1H, one proton of  $\text{CH}_2$ ), 2.10-1.96 (m, 1H one proton of  $\text{CH}_2$ ), 1.48-1.07 (m, 4H,  $2 \times \text{CH}_2$ ), 0.93 (t,  $J = 7.4$  Hz, 3H,  $\text{CH}_3$ );  $^{13}\text{C}$  NMR (75 MHz,  $\text{CDCl}_3$ )  $\delta$  195.4, 148.2, 147.3, 134.1, 130.4, 121.8, 121.1, 108.42, 108.36, 101.3, 65.1, 31.6, 26.9, 23.0, 13.9; IR (neat)  $\nu$  ( $\text{cm}^{-1}$ ) 2957, 2931, 2872, 2774, 2716, 1728, 1618, 1505, 1487, 1438, 1380, 1351, 1243, 1166, 1112, 1094, 1040; MS (70 eV, EI)  $m/z$  (%): 326 ( $M^+(^{81}\text{Br})$ , 22.72), 324 ( $M^+(^{79}\text{Br})$ , 25.66), 115 (100); HRMS

calcd for  $C_{15}H_{17}O_3^{79}Br$  ( $M^+$ ): 324.0361. Found: 324.0368.

### 15. Synthesis of (+)-3-bromo-2-butyl-2-thienyl-3-butenal *S*-**3o** (gbj-9-44)

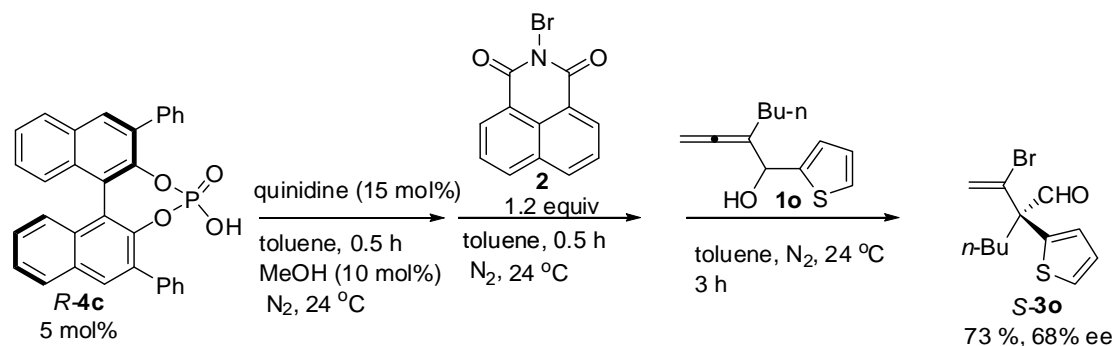

The reaction of quinidine (24.3 mg, 0.075 mmol), *R*-**4c** (12.6 mg, 0.025 mmol), MeOH (2.0  $\mu$ L, 0.05 mmol), **2** (166.2 mg, 0.6 mmol), and allenol **1o** (103.4 mg, 0.5 mmol) in 10 mL of toluene at 24 °C for 3 h afforded *S*-**3o** (104.1 mg, 73%, 68% ee, HPLC conditions: OJ-H column, *n*-hexane/*i*-PrOH = 80/20, 1.2 mL/min,  $\lambda$  = 230 nm,  $t_R$  (major) = 5.1 min,  $t_R$  (minor) = 8.3 min) as a liquid:  $[\alpha]_D^{20} = +56.6^\circ$  ( $c = 1.00$ ,  $CHCl_3$ );  $^1H$  NMR (300 MHz,  $CDCl_3$ )  $\delta$  9.58 (s, 1H, CHO), 7.35 (dd,  $J = 4.8$  Hz and 1.5 Hz, 1H, ArH), 7.12-6.94 (m, 2H, ArH), 6.03 (d,  $J = 2.7$  Hz, 1H, one proton of =CH<sub>2</sub>), 5.93 (d,  $J = 2.7$  Hz, 1H, one proton of =CH<sub>2</sub>), 2.32-2.07 (m, 2H, CH<sub>2</sub>), 1.50-1.17 (m, 4H, 2  $\times$  CH<sub>2</sub>), 0.93 (t,  $J = 7.1$  Hz, 3H, CH<sub>3</sub>);  $^{13}C$  NMR (75 MHz,  $CDCl_3$ )  $\delta$  193.7, 140.5, 133.1, 127.2, 127.1, 126.4, 121.1, 63.6, 33.4, 26.6, 22.9, 13.9; IR (neat)  $\nu$  (cm<sup>-1</sup>) 3108, 3069, 2957, 2932, 2871, 2816, 2714, 1732, 1619, 1466, 1429, 1380, 1238, 1156, 1095, 1047; MS (70 eV, EI)  $m/z$  (%): 288 ( $M^+$ (<sup>81</sup>Br), 1.27), 286 ( $M^+$ (<sup>79</sup>Br), 1.37), 259 (100); HRMS calcd for  $C_{12}H_{15}OS^{79}Br$  ( $M^+$ ): 286.0027. Found: 286.0030.

### 16. Synthesis of (+)-3-bromo-2-butyl-2-(3,4,5-trimethoxyphenyl)-3-butenal *R*-**3p**

(gbj-11-85)

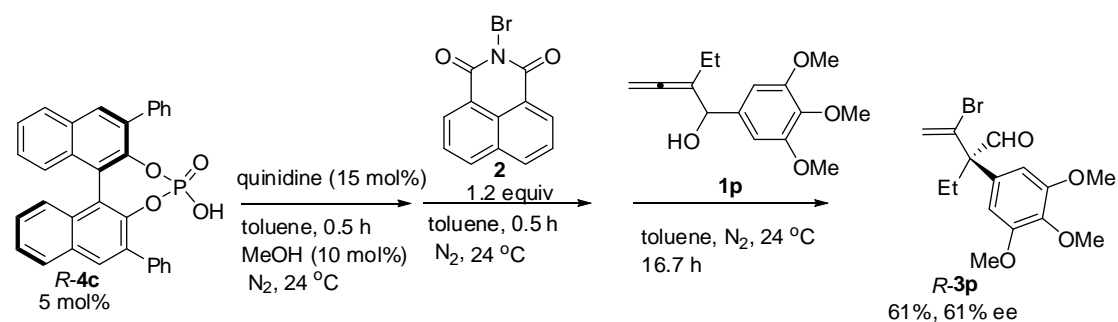

The reaction of quinidine (24.5 mg, 0.075 mmol), *R*-**4c** (12.4 mg, 0.025 mmol), MeOH (2.0  $\mu$ L, 0.05 mmol), **2** (165.5mg, 0.6 mmol), and allenol **1p** (132.2 mg, 0.5 mmol) in 10 mL of toluene at 24 °C for 16.7 h afforded *R*-**3p** (104.1 mg, 61%, 61% ee, HPLC conditions: OD-H column, *n*-hexane/*i*-PrOH = 95/5, 0.8 mL/min,  $\lambda$  = 230 nm,  $t_R$  (major) = 12.2 min,  $t_R$  (minor) = 14.9 min) as a liquid:  $[\alpha]_D^{20} = +42.5^\circ$  ( $c = 1.00$ , CHCl<sub>3</sub>); <sup>1</sup>H NMR (300 MHz, CDCl<sub>3</sub>)  $\delta$  9.62 (s, 1 H, CHO), 6.53 (s, 2H, ArH), 6.06 (d,  $J = 2.4$  Hz, 1H, one proton of =CH<sub>2</sub>), 6.01 (d,  $J = 2.7$  Hz, 1H, one proton of =CH<sub>2</sub>), 3.87 (s, 9H, 3  $\times$  OCH<sub>3</sub>), 2.40-2.22 (m, 1H, one proton of CH<sub>2</sub>), 2.20-2.01 (m, 1H, one proton of CH<sub>2</sub>), 0.94 (t,  $J = 7.2$  Hz, 3H, CH<sub>3</sub>); <sup>13</sup>C NMR (75 MHz, CDCl<sub>3</sub>)  $\delta$  195.3, 153.3, 137.7, 133.3, 131.9, 121.7, 105.4, 66.0, 60.7, 56.1, 24.6, 9.2; IR (neat)  $\nu$  (cm<sup>-1</sup>) 2974, 2937, 2881, 2835, 2724, 1726, 1619, 1588, 1510, 1461, 1415, 1321, 1247, 1187, 1128, 1007; MS (70 eV, EI)  $m/z$  (%): 344 (M<sup>+</sup>(<sup>81</sup>Br), 44.67), 342 (M<sup>+</sup>(<sup>79</sup>Br), 48.93), 234 (100); HRMS calcd for C<sub>15</sub>H<sub>19</sub>O<sub>4</sub><sup>79</sup>Br (M<sup>+</sup>): 342.0467. Found: 324.0473.

17. Synthesis of (+)-3-bromo-2-butyl-2-(4-methylphenyl)-3-butenal *R*-**3q**

(gbj-11-199)

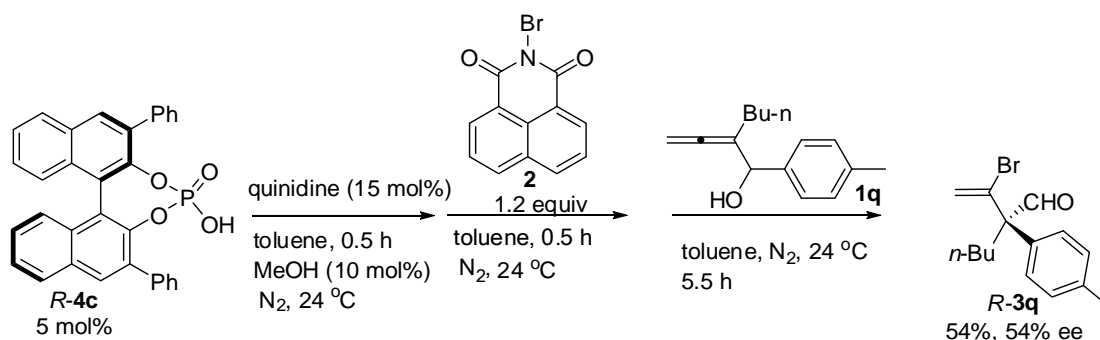

The reaction of quinidine (24.3 mg, 0.075 mmol), *R*-**4c** (12.5 mg, 0.025 mmol), MeOH (2.0  $\mu$ L, 0.05 mmol), **2** (165.5 mg, 0.6 mmol), and allenol **1q** (108.0 mg, 0.5 mmol) in 10 mL of toluene at 24 °C for 5.5 h afforded *R*-**3q** (79.7 mg, 54%, 54% ee, HPLC conditions: OJ-H column, *n*-hexane/*i*-PrOH = 80/20, 1.2 mL/min,  $\lambda$  = 230 nm,  $t_R$  (major) = 4.5 min,  $t_R$  (minor) = 5.8 min) as a liquid:  $[\alpha]_D^{20} = +50.3^\circ$  ( $c = 0.99$ , CHCl<sub>3</sub>); <sup>1</sup>H NMR (300 MHz, CDCl<sub>3</sub>)  $\delta$  9.63 (s, 1H, CHO), 7.21 (s, 4H, ArH), 6.02 (d,  $J = 3.0$  Hz, 1H, one proton of =CH<sub>2</sub>), 5.94 (d,  $J = 2.4$  Hz, 1H, one proton of =CH<sub>2</sub>), 2.35 (s, 3H, CH<sub>3</sub>), 2.28-2.15 (m, 1H, one proton of CH<sub>2</sub>), 2.14-2.00 (m, 1H one proton of CH<sub>2</sub>), 1.49-1.08 (m, 4H, 2  $\times$  CH<sub>2</sub>), 0.93 (t,  $J = 7.2$  Hz, 3H, CH<sub>3</sub>); <sup>13</sup>C NMR (75 MHz, CDCl<sub>3</sub>)  $\delta$  196.0, 137.8, 134.1, 133.7, 129.6, 128.0, 121.2, 65.4, 31.4, 26.9, 23.1, 21.0, 13.9; IR (neat)  $\nu$  (cm<sup>-1</sup>) 3026, 2957, 2930, 2871, 2718, 1729, 1619, 1511, 1466, 1409, 1380, 1195, 1160, 1093, 1020; MS (70 eV, EI)  $m/z$  (%): 296 (M<sup>+</sup>(<sup>81</sup>Br), 1.42), 294 (M<sup>+</sup>(<sup>79</sup>Br), 1.65), 143 (100). HRMS calcd for C<sub>15</sub>H<sub>19</sub>O<sup>79</sup>Br (M<sup>+</sup>): 294.0619. Found: 294.0622.

#### Reference:

- 1) C. Fu, J. Li, S. Ma, *Chem. Commun.* 2005, 4119-4121.

$^1\text{H}$  and  $^{13}\text{C}$  NMR spectra of all these compounds

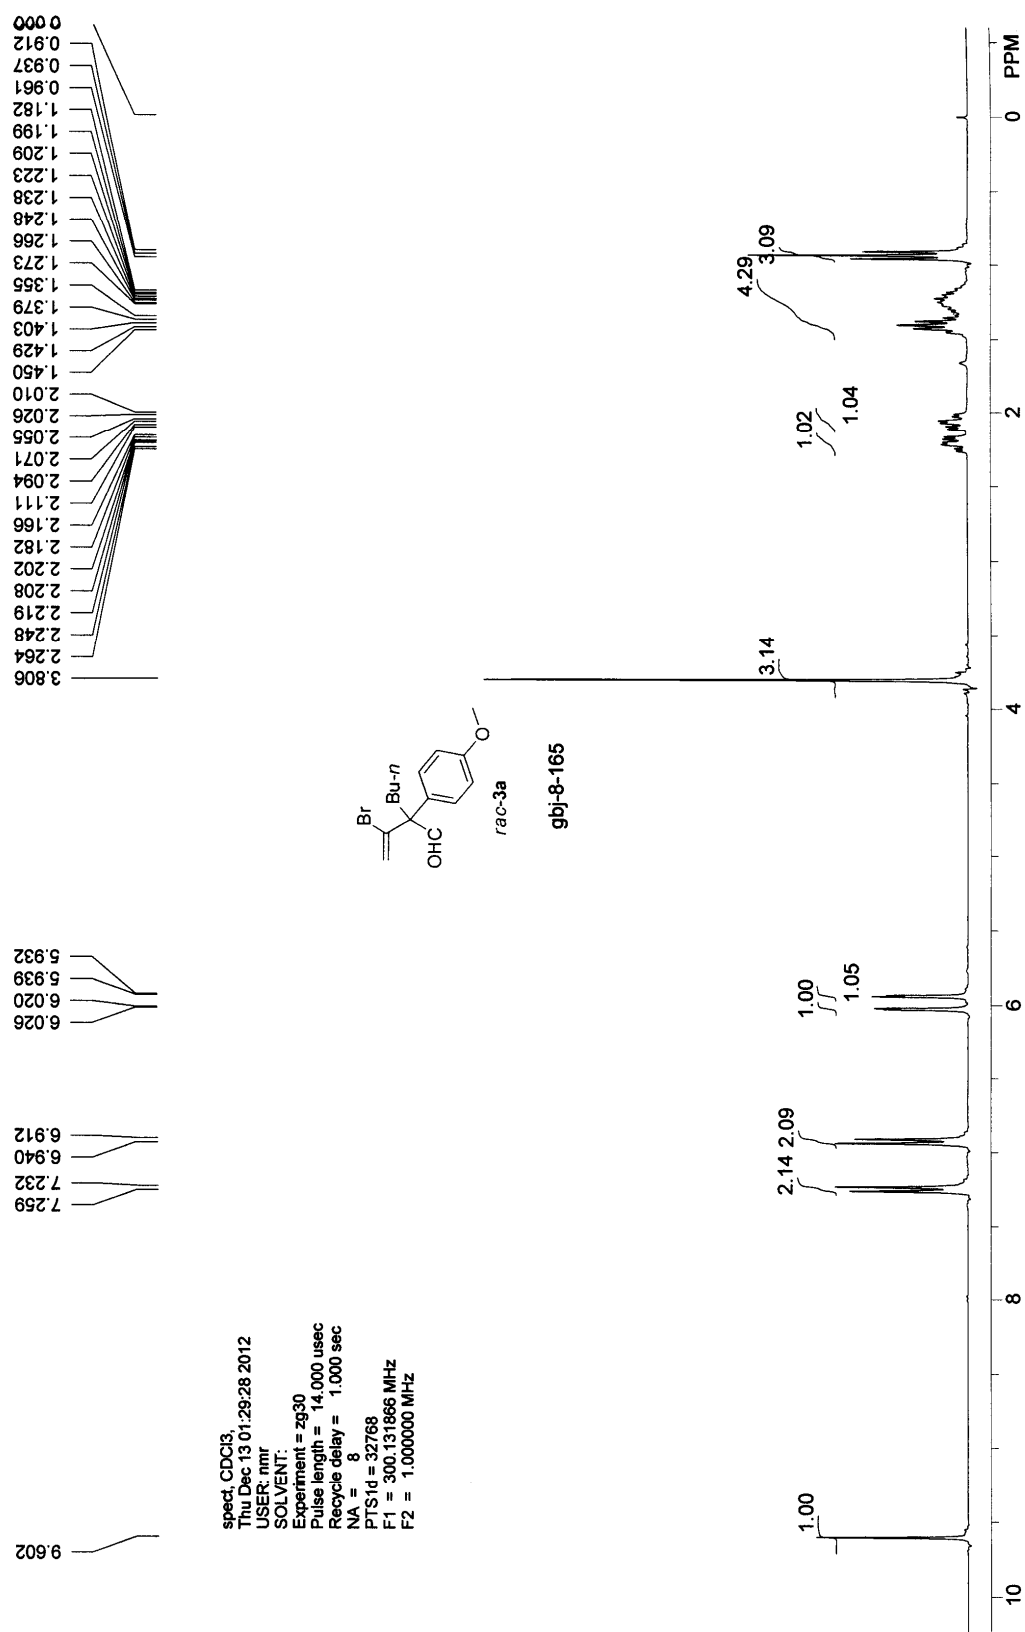



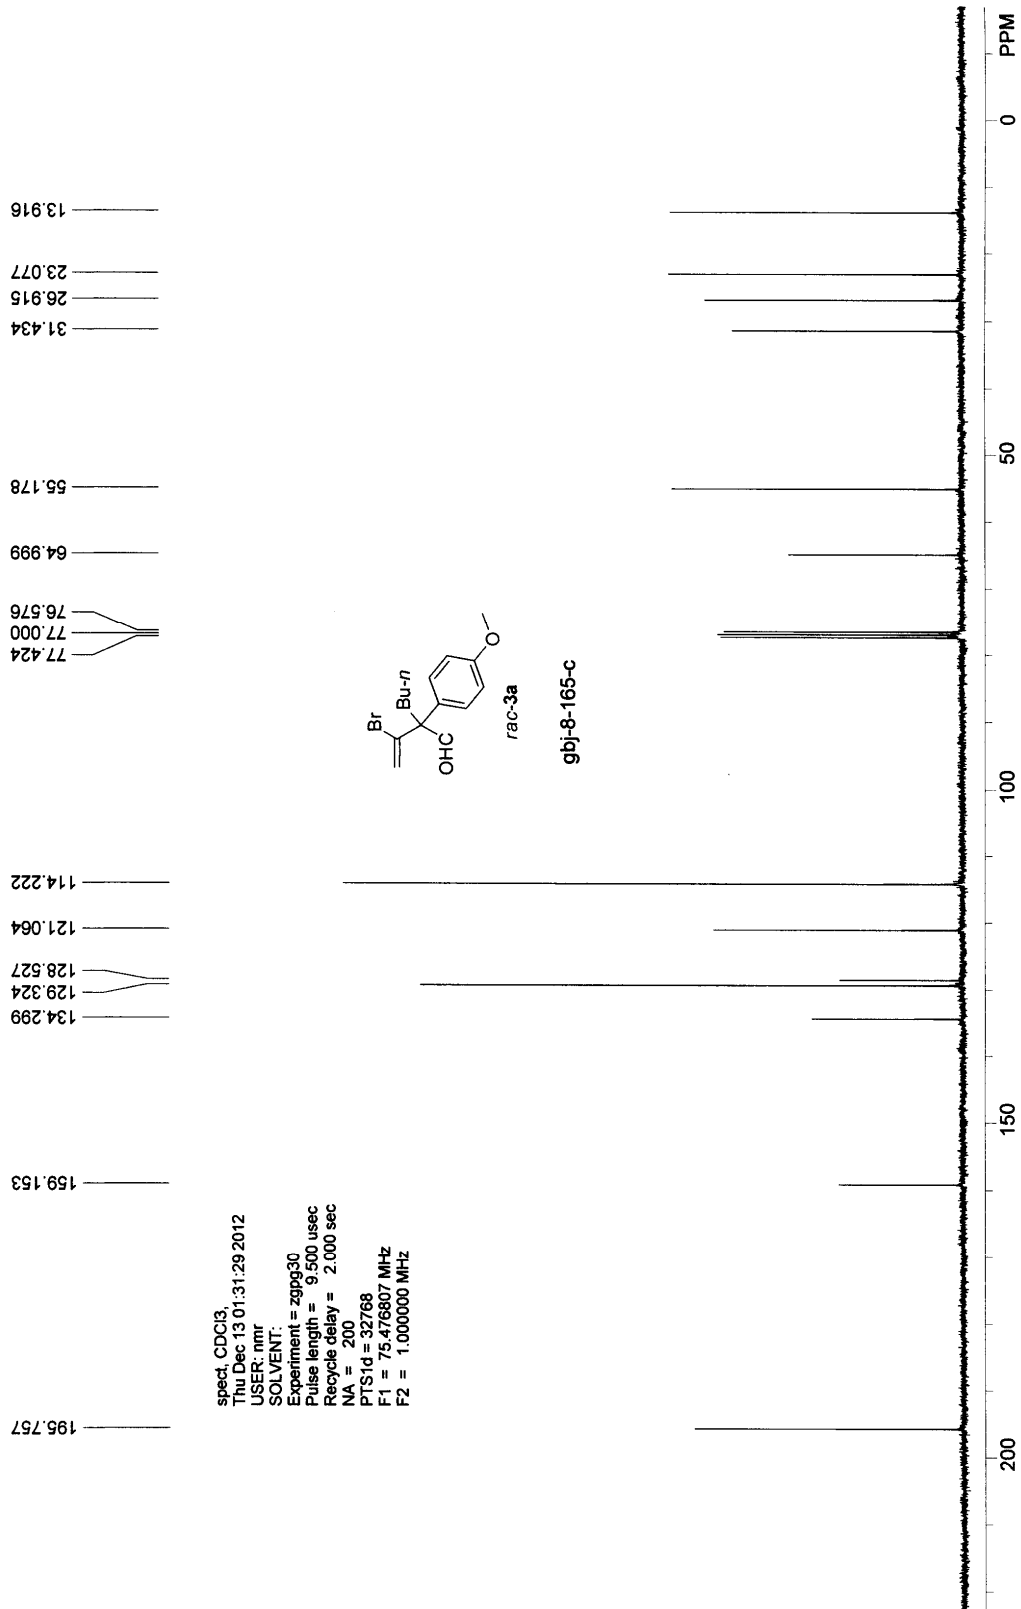

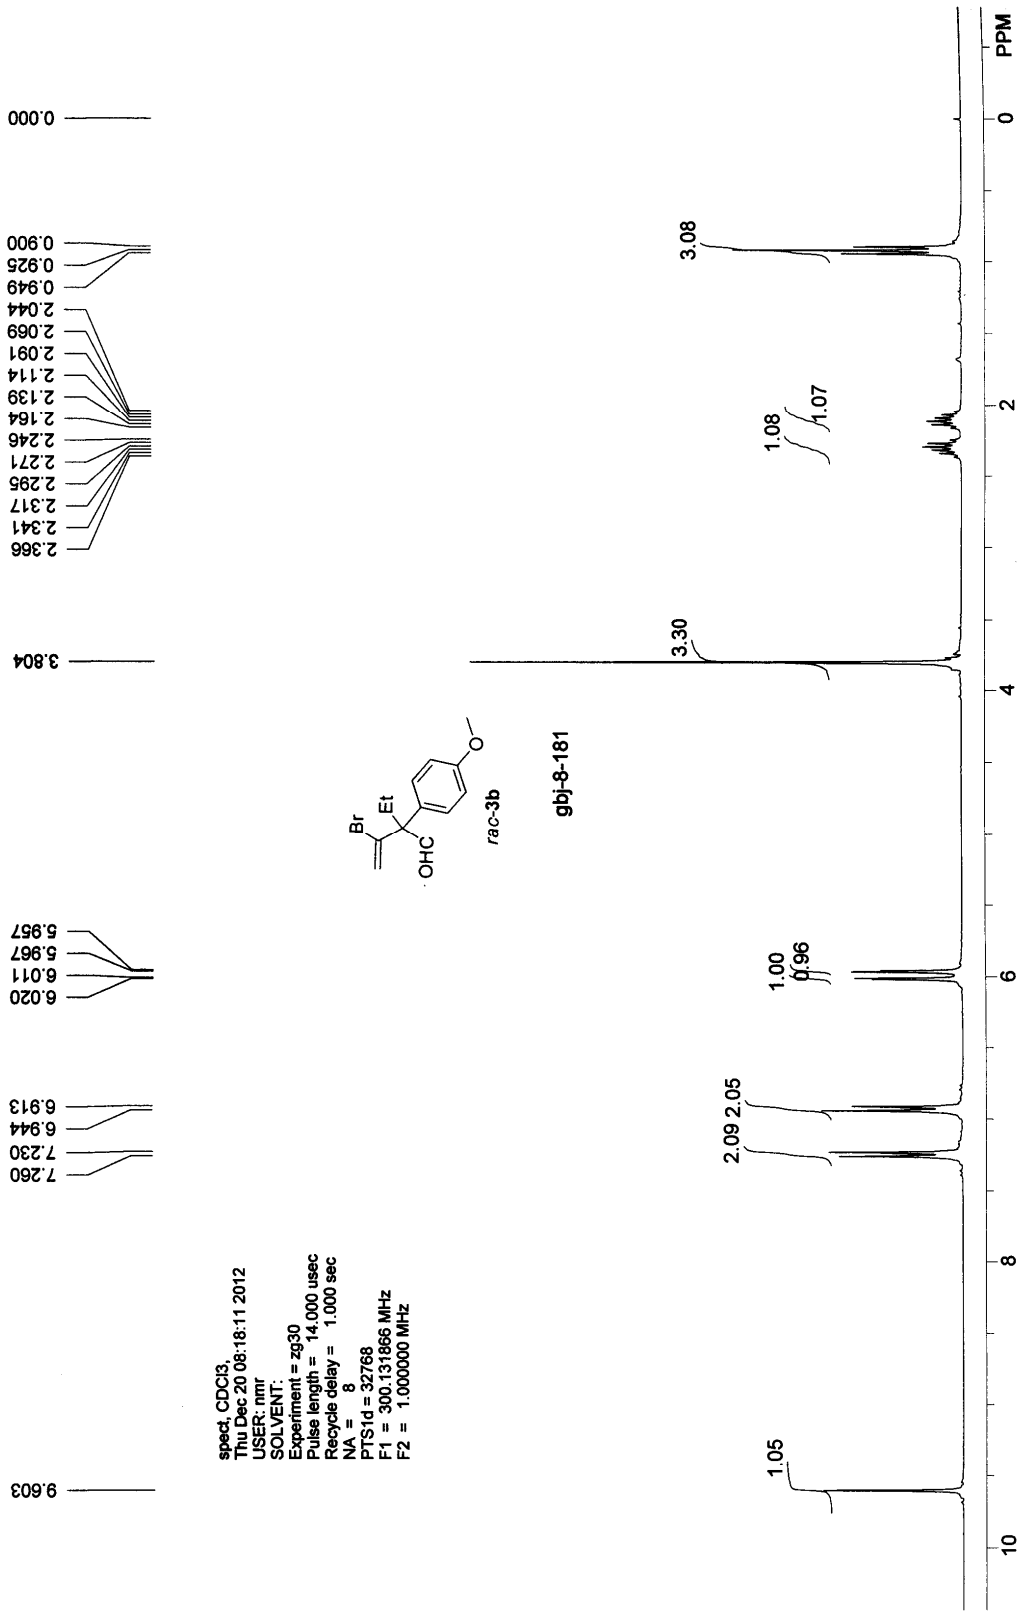

specd, CDC13,  
 Thu Dec 20 08:18:11 2012  
 USER: nmr  
 SOLVENT:  
 Experiment = z930  
 Pulse length = 14,000 usec  
 Recycle delay = 1,000 sec  
 NA = 8  
 PTS1d = 32768  
 F1 = 300.131866 MHz  
 F2 = 1,000000 MHz

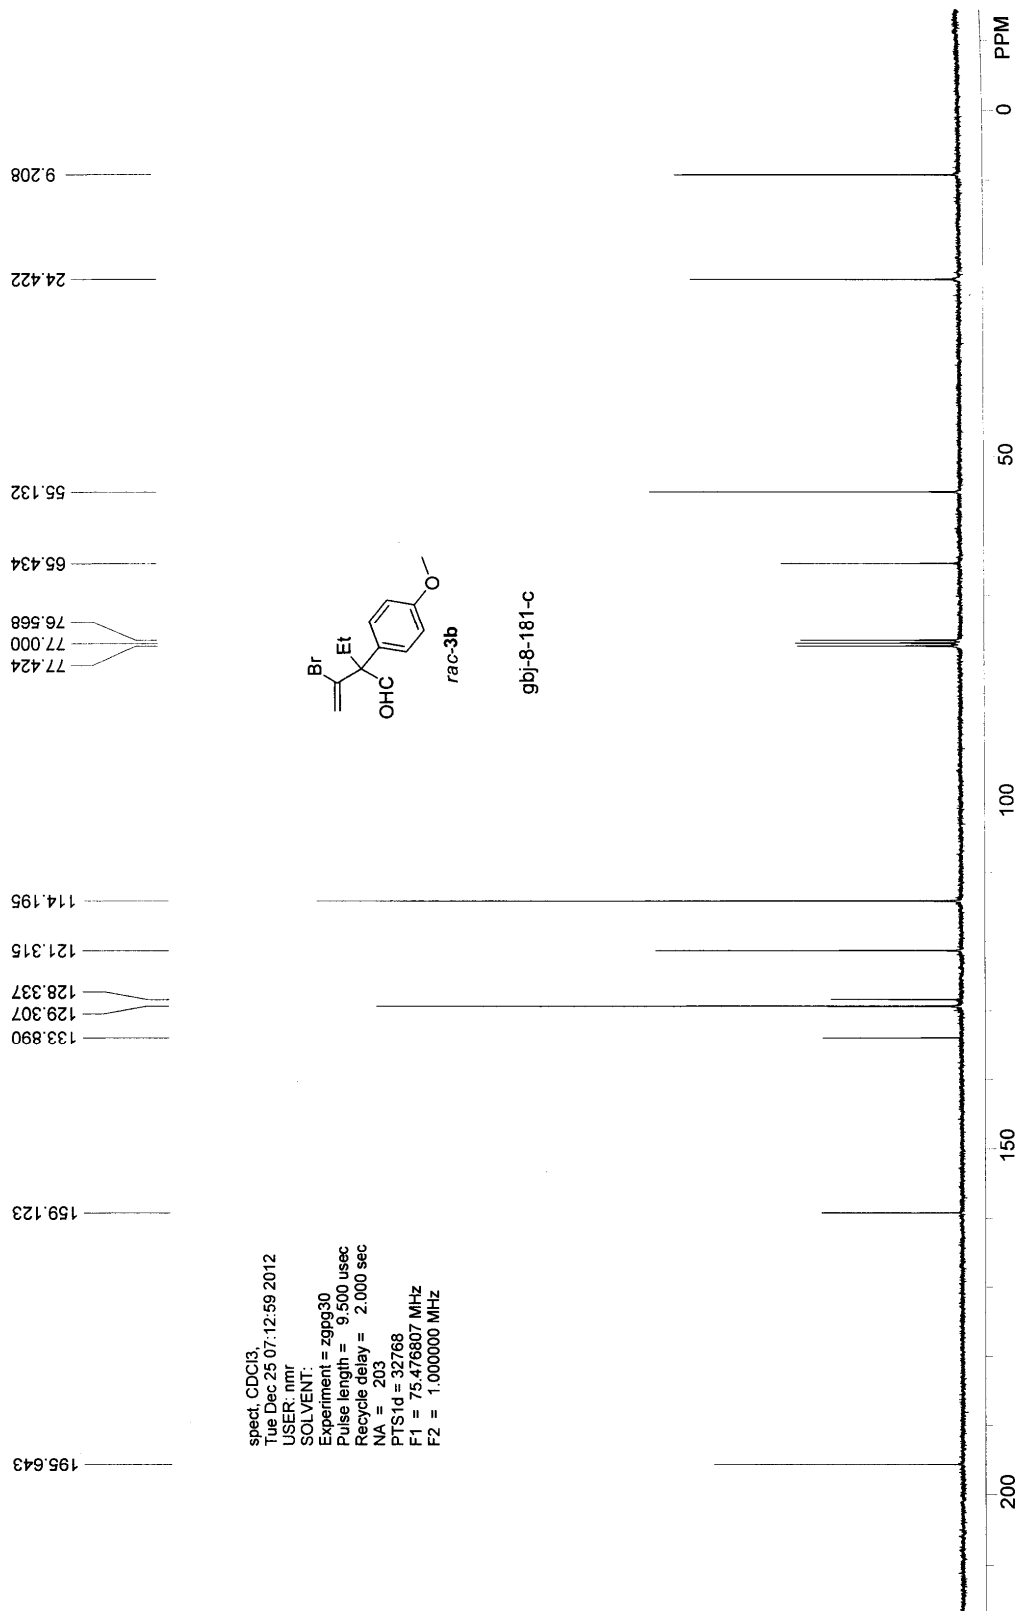

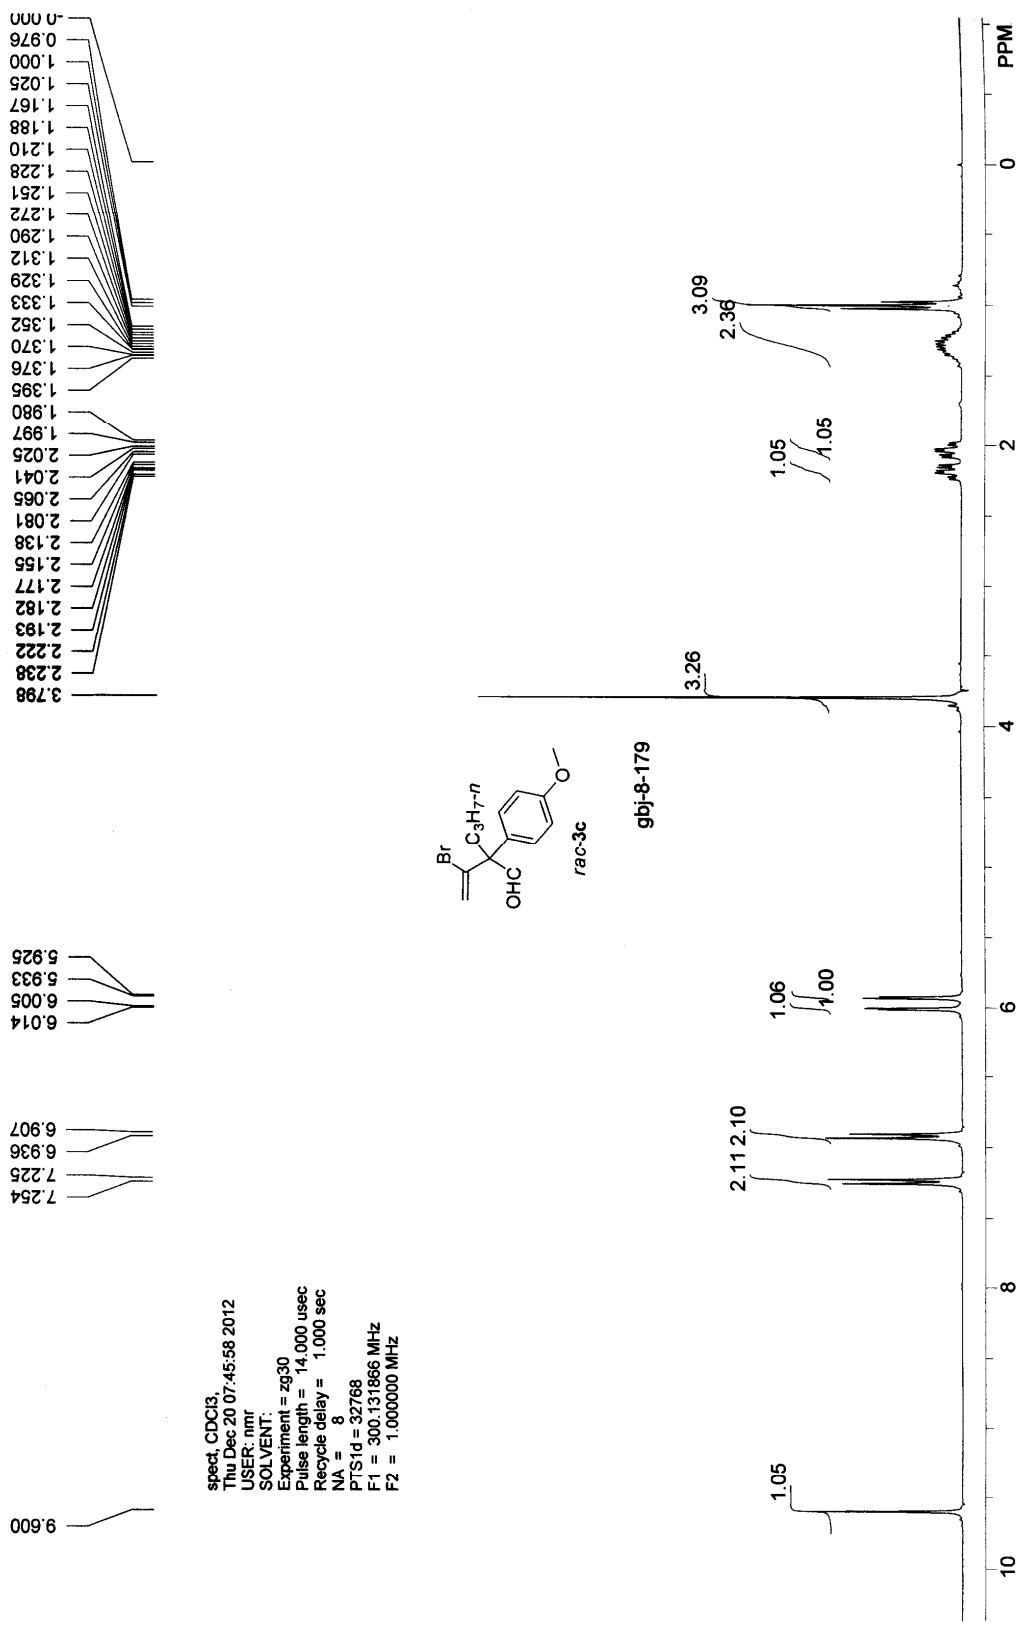

spect\_CDCl3  
 Thu Dec 20 07:45:58 2012  
 USER: nmr  
 SOLVENT:  
 Experiment = zg30  
 Pulse length = 14,000 usec  
 Recycle delay = 1,000 sec  
 NA = 8  
 P1 = 32768  
 F1 = 300.131866 MHz  
 F2 = 1,000,000 MHz

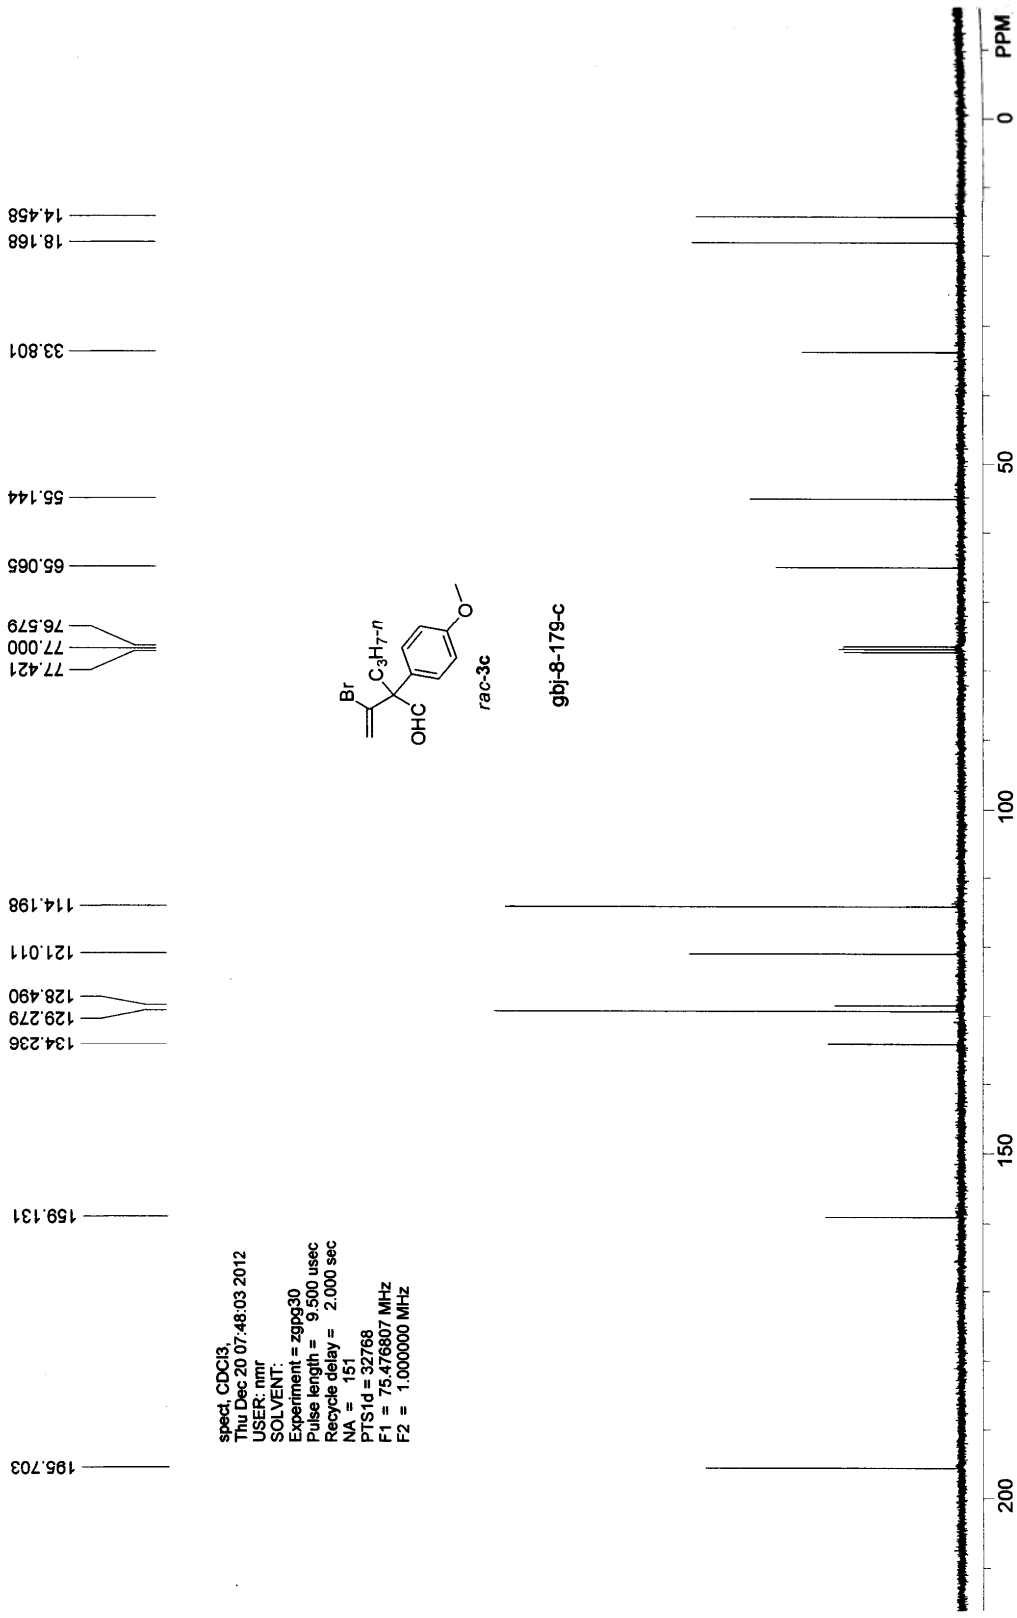

spect, CDCl3,  
 Thu Dec 20 07:48:03 2012  
 USER: nmr  
 SOLVENT:  
 Experiment = zgpg30  
 Pulse length = 9.500 usec  
 Recycle delay = 2.000 sec  
 NA = 151  
 PTS1d = 32768  
 F1 = 75.476807 MHz  
 F2 = 1.000000 MHz

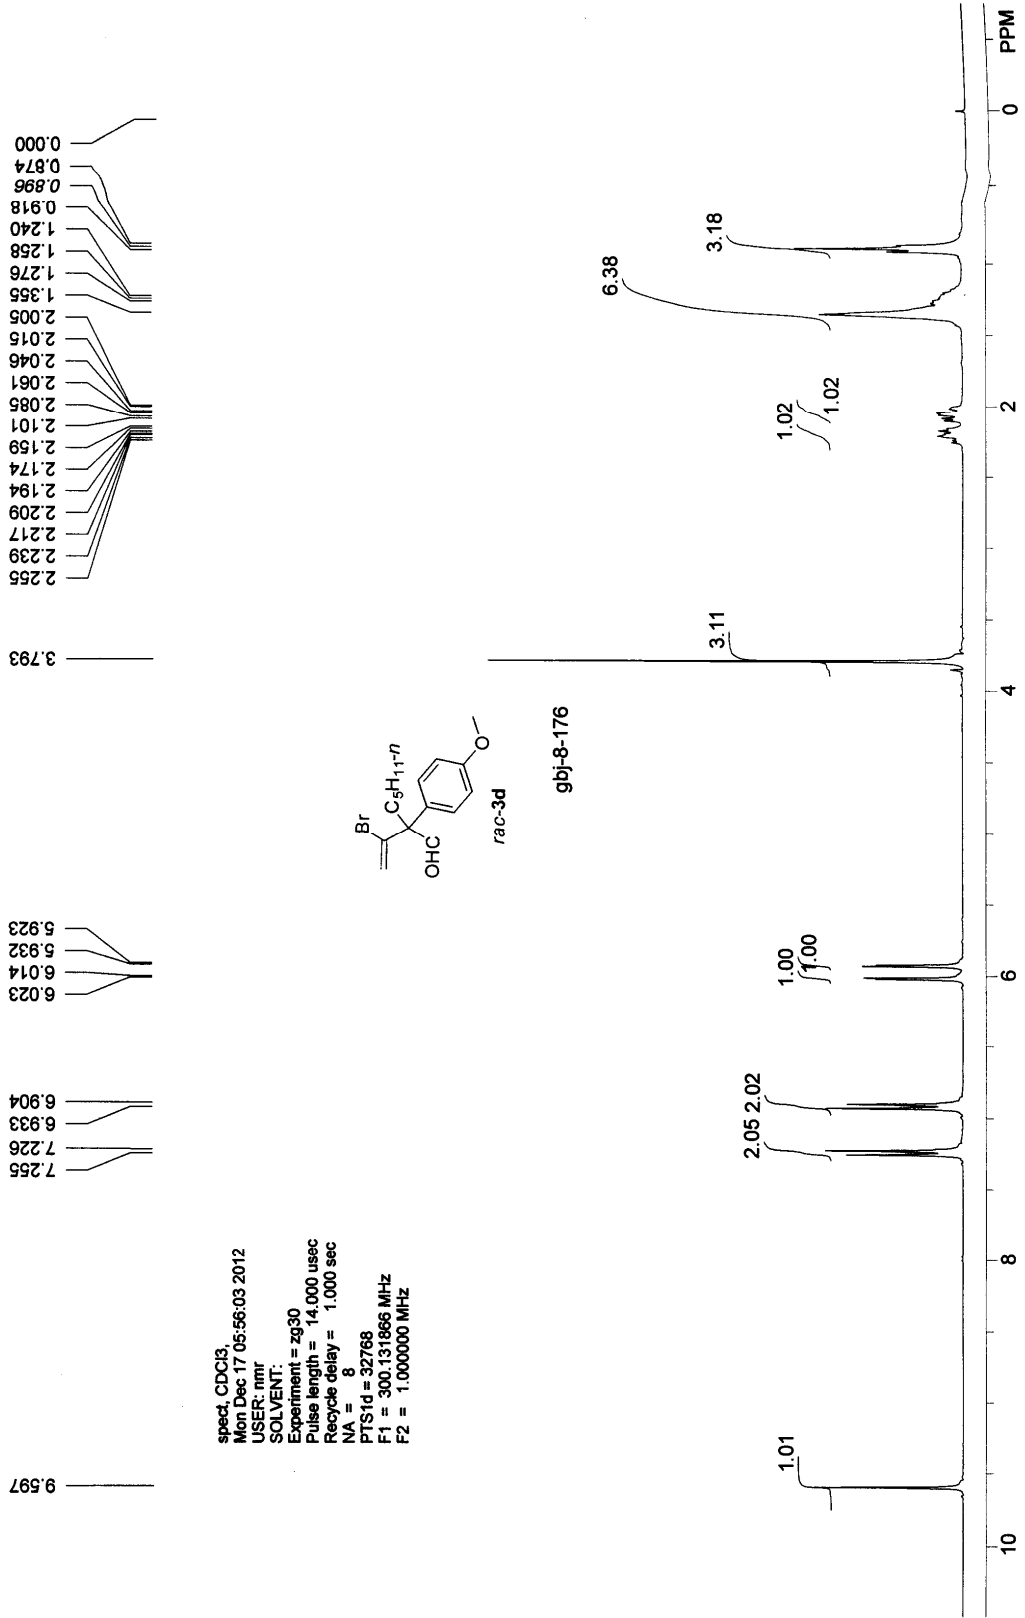

spect, CDC13,  
 Mon Dec 17 05:56:03 2012  
 USER: nmr  
 SOLVENT:  
 Experiment = zg30  
 Pulse length = 14,000 usec  
 Recycle delay = 1,000 sec  
 NA = 8  
 PTS1d = 32768  
 F1 = 300.131866 MHz  
 F2 = 1,000000 MHz

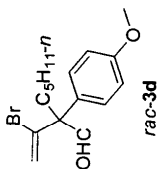

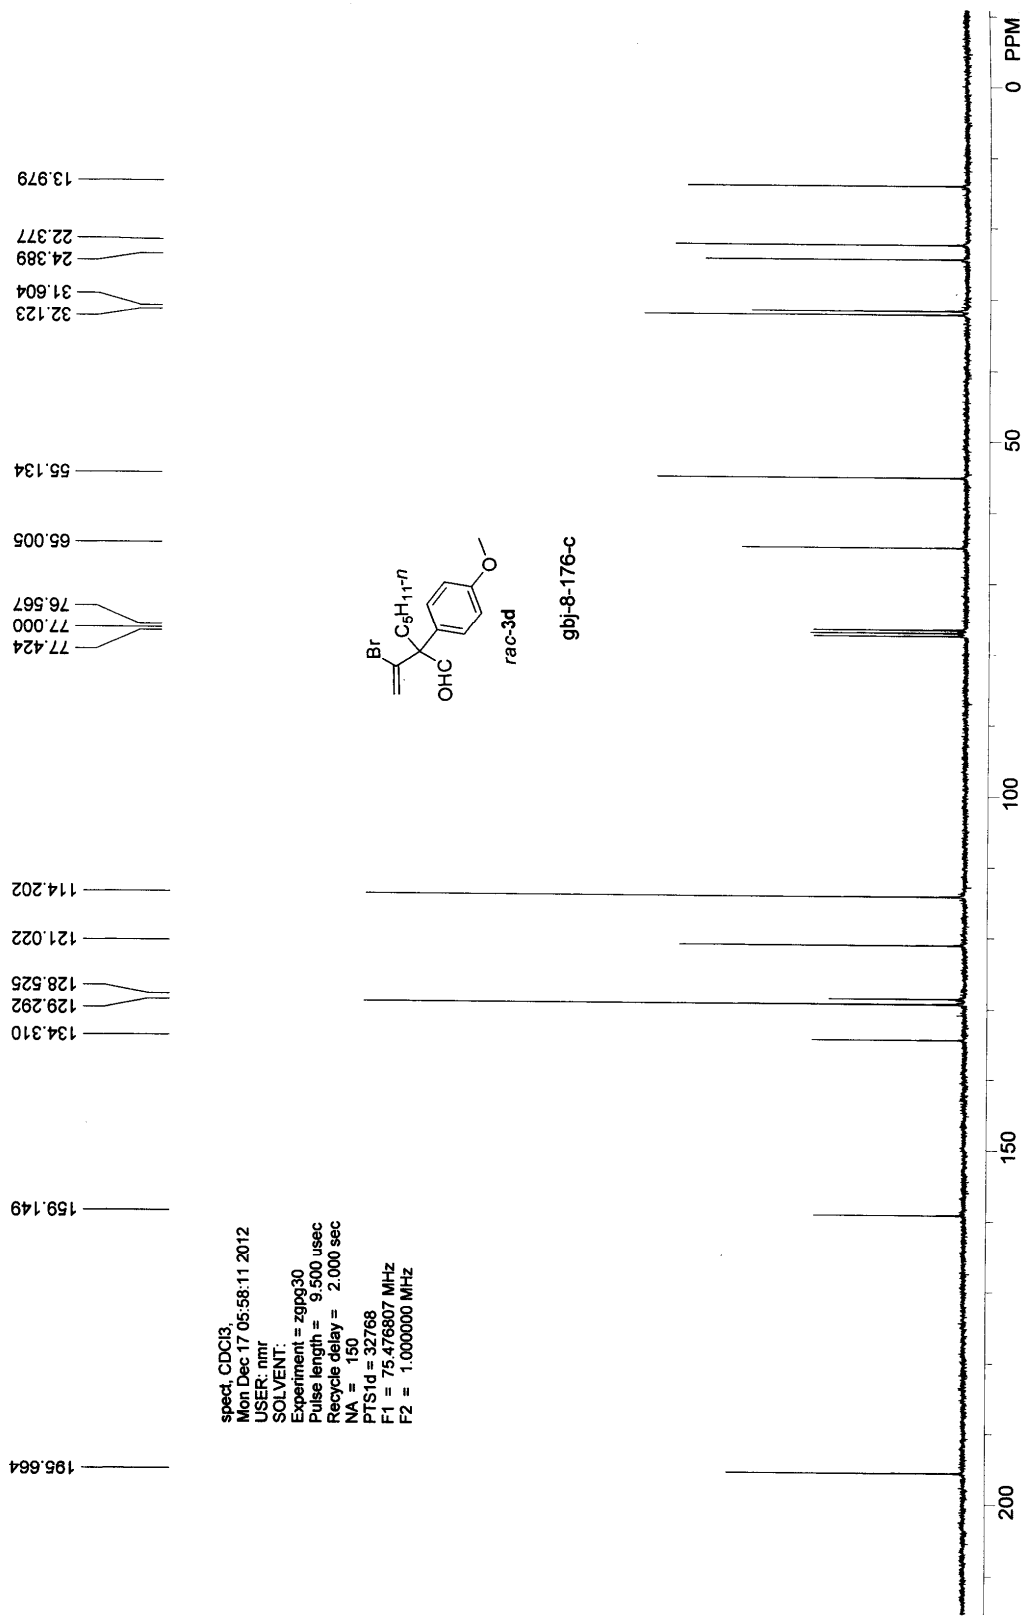

spect, CDCI3,  
 Mon Dec 17 05:58:11 2012  
 USER: nmr  
 SOLVENT:  
 Experiment = zpp030  
 Pulse length = 9.500 usec  
 Recycle delay = 2.000 sec  
 NA = 150  
 F1 = 75.476807 MHz  
 F2 = 1.0000000 MHz

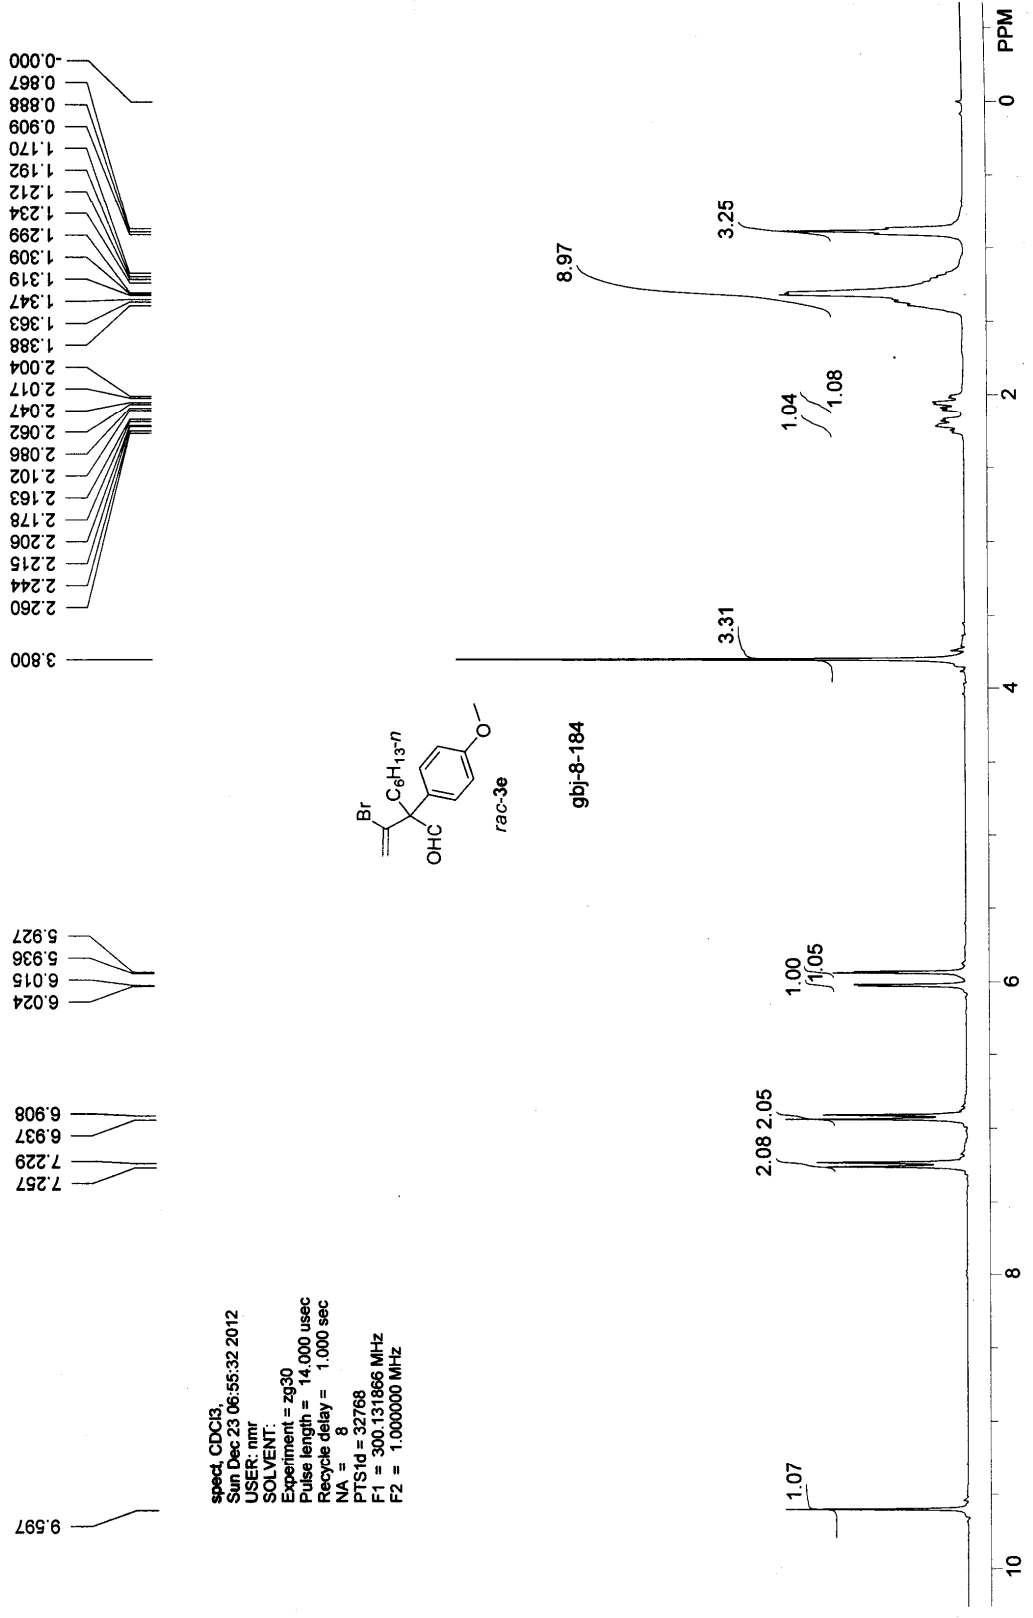

spect, CDCl3  
 Sun Dec 23 06:55:32 2012  
 USER: nmr  
 SOLVENT:  
 Experiment = z930  
 Pulse length = 14.000 usec  
 Recycle delay = 1.000 sec  
 NA = 8  
 P1STD1 = 32768  
 F1 = 300.131866 MHz  
 F2 = 1.000000 MHz



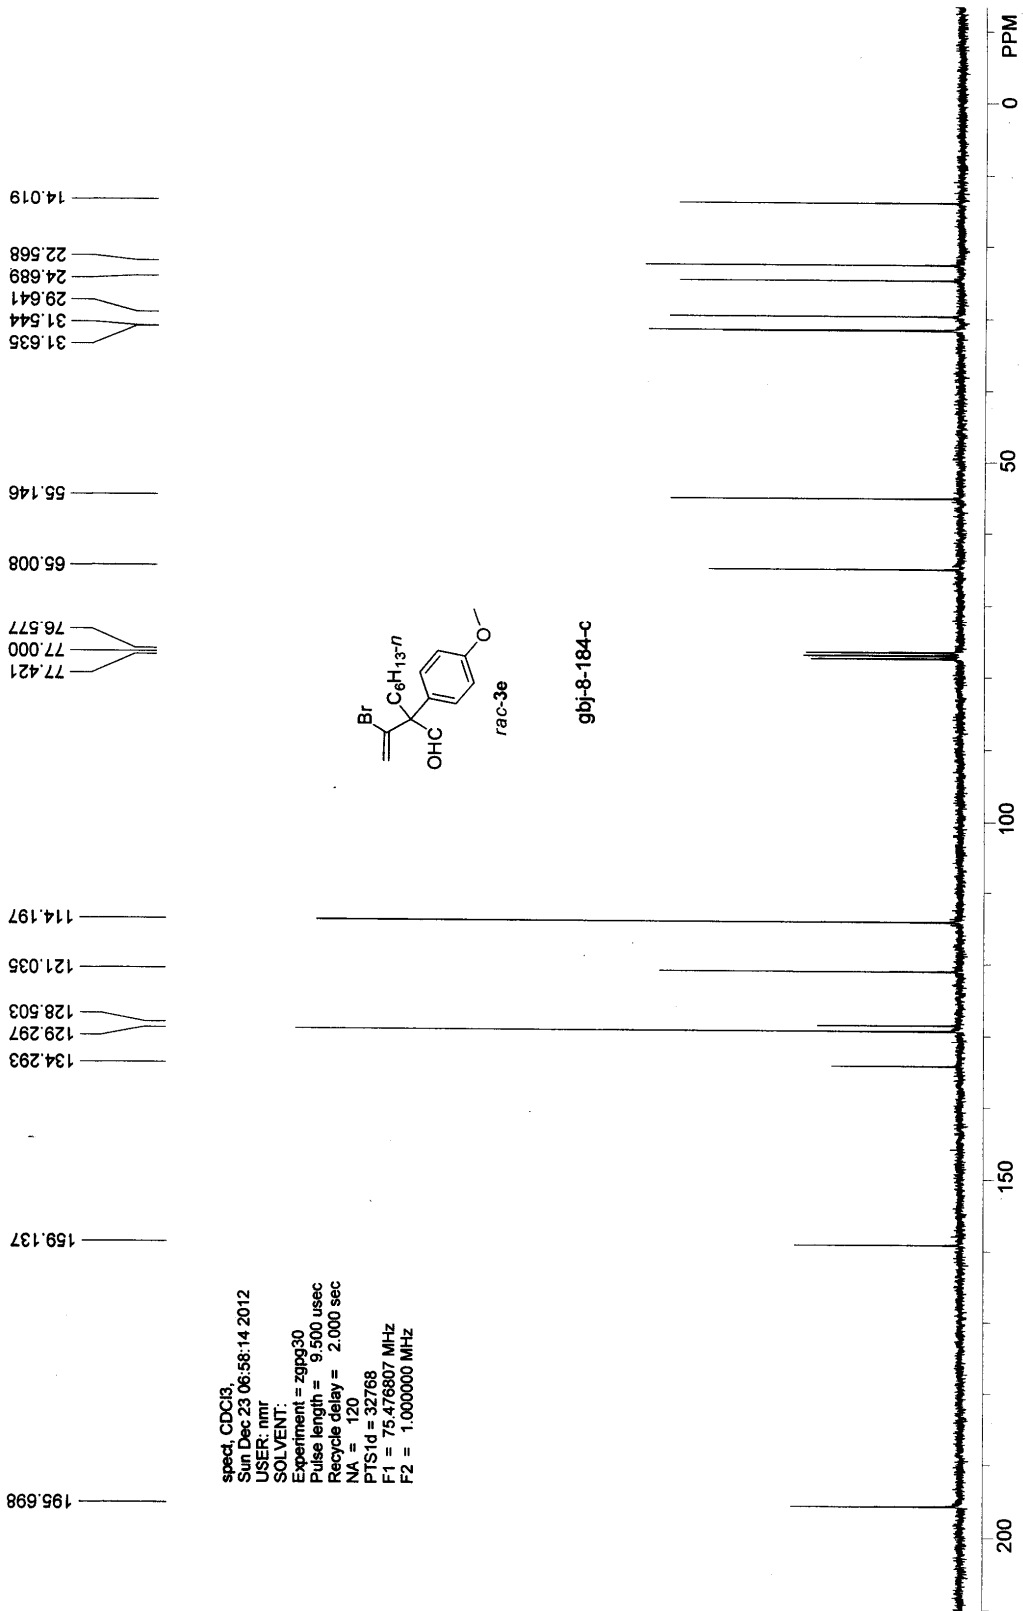

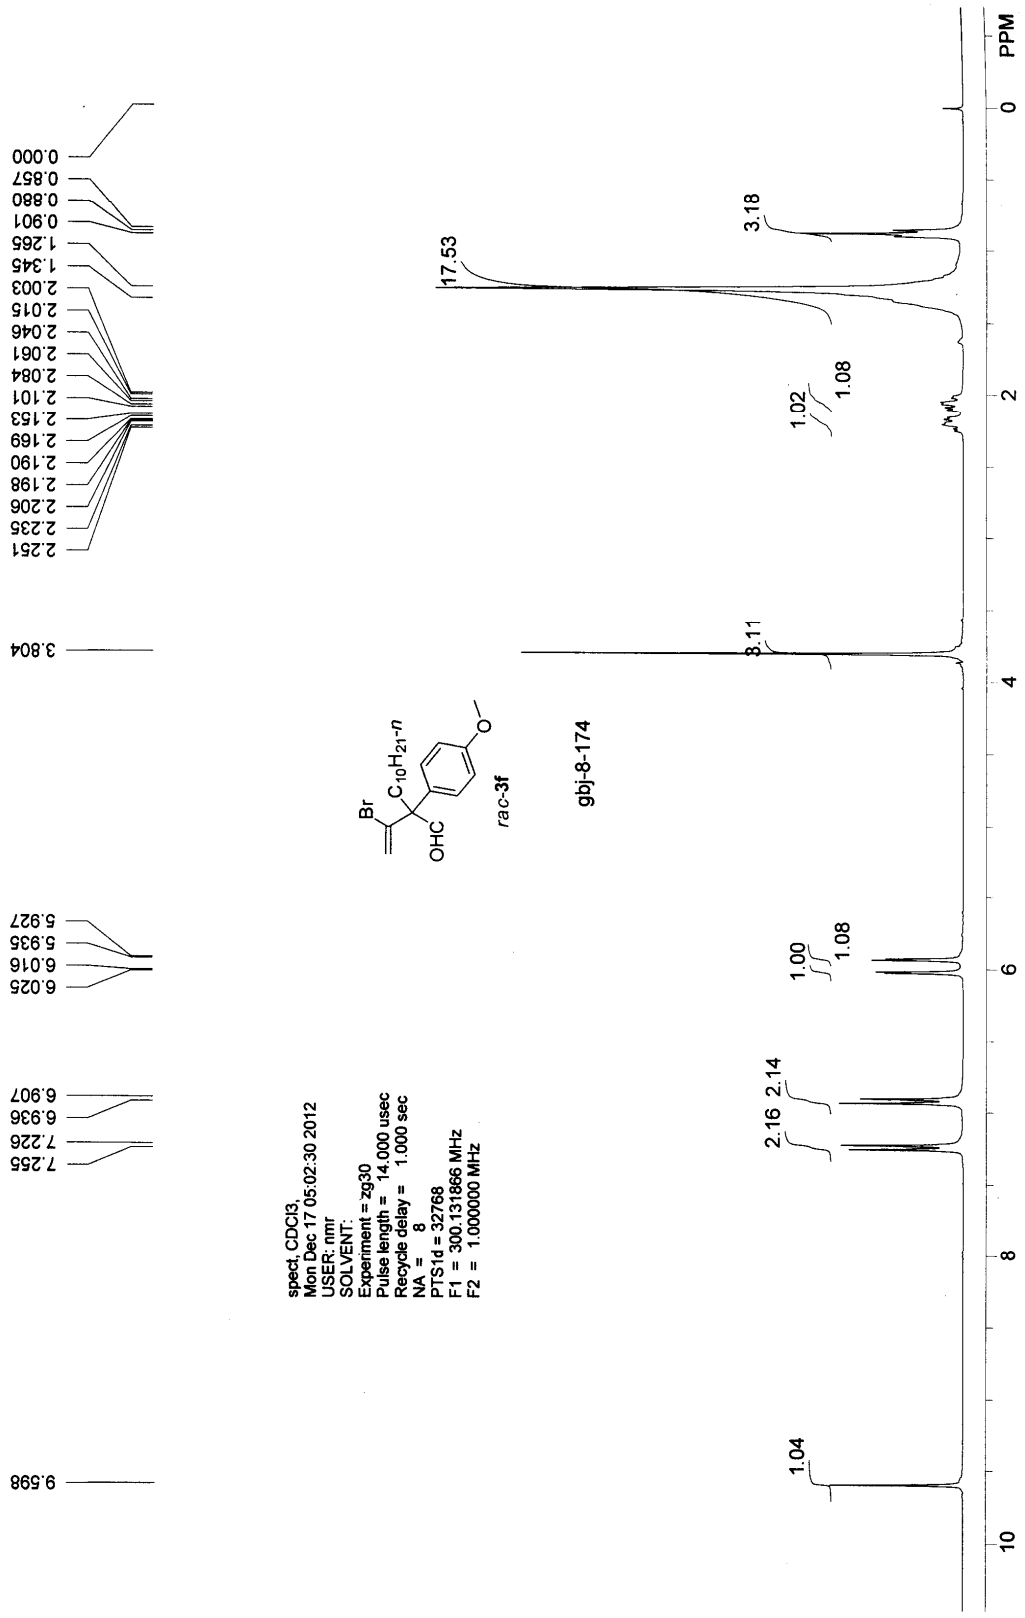

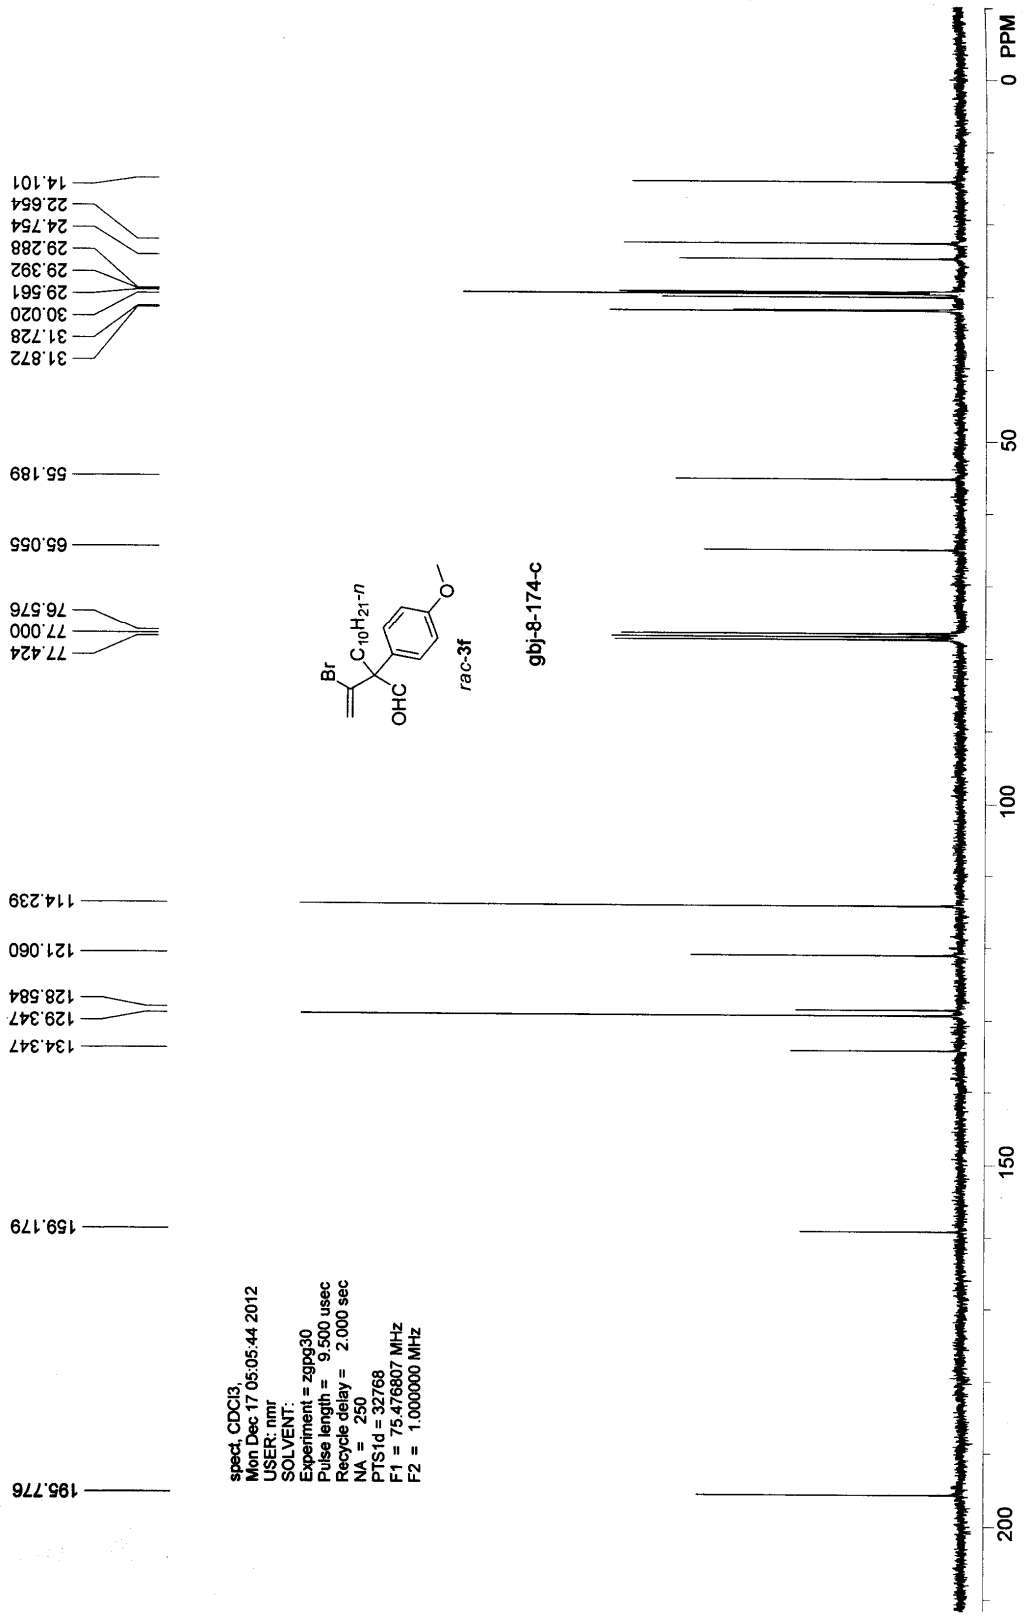

spect, CDCl3,  
 Mon Dec 17 05:05:44 2012  
 USER: nmr  
 SOLVENT:  
 Experiment = zgpg30  
 Pulse length = 9.500 usec  
 Recycle delay = 2.000 sec  
 NA = 250  
 P1 = 32768  
 F1 = 75.476807 MHz  
 F2 = 1.000000 MHz

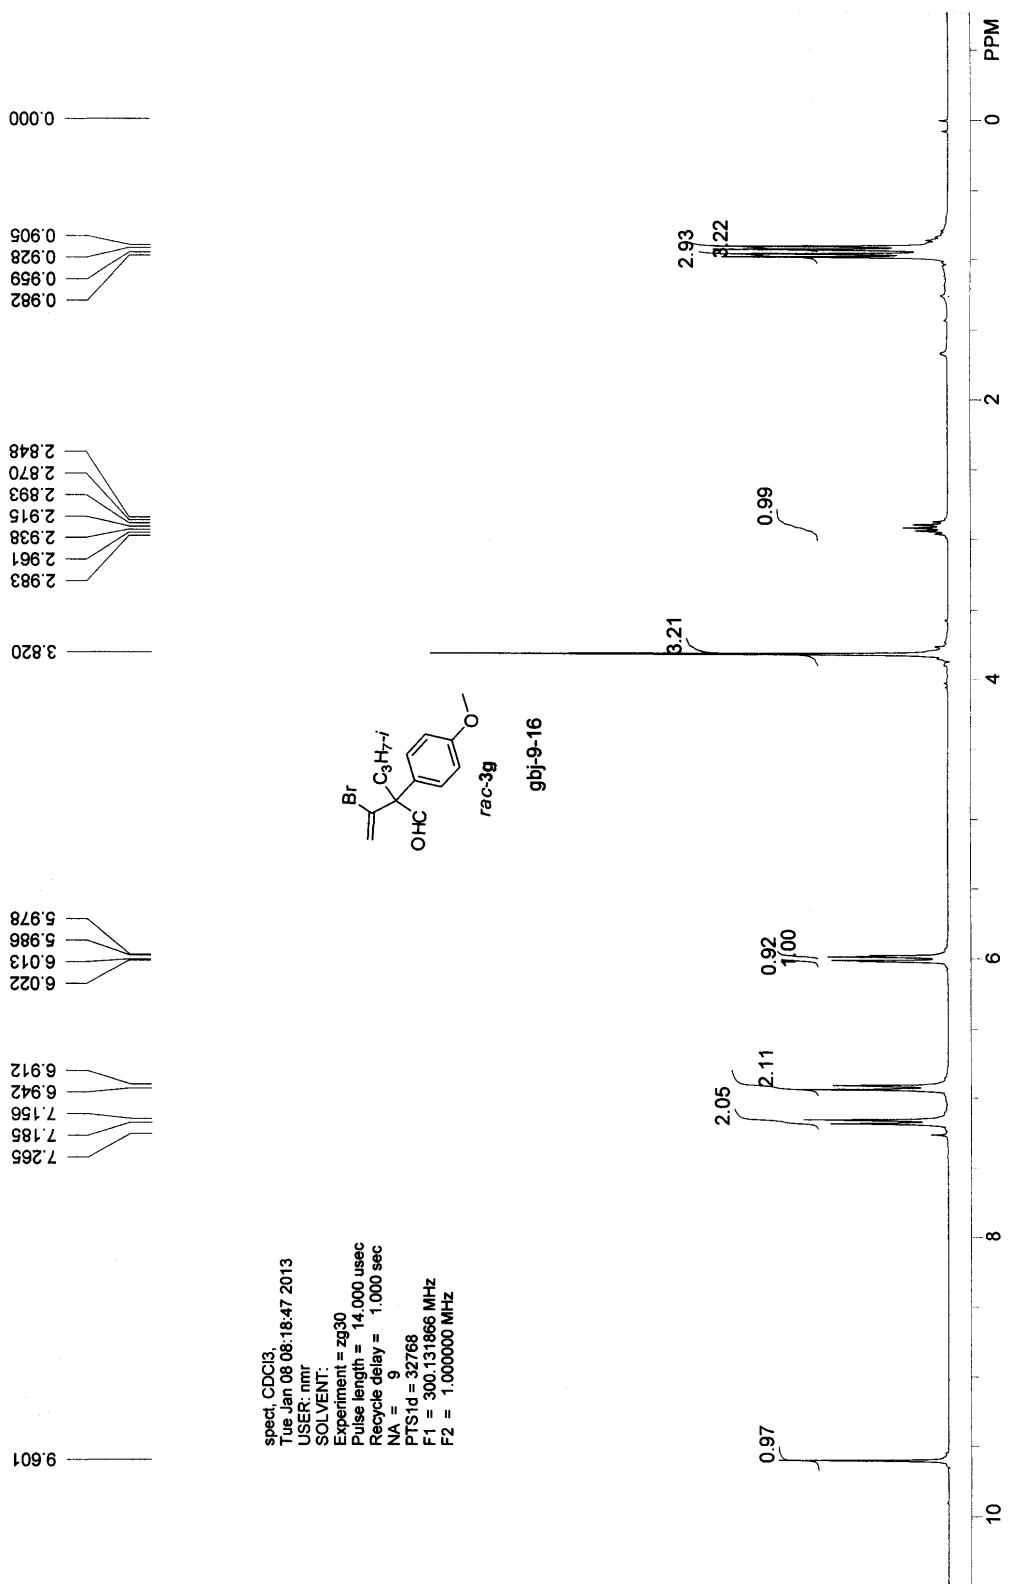

spect: CDC13  
 Tue Jan 08 08:18:47 2013  
 USER: nmr  
 SOLVENT:  
 Experiment = zq30  
 Pulse length = 14,000 usec  
 Recycle delay = 1,000 sec  
 NA = 9  
 PTS14 = 32768  
 F1 = 300.131866 MHz  
 F2 = 1.000000 MHz

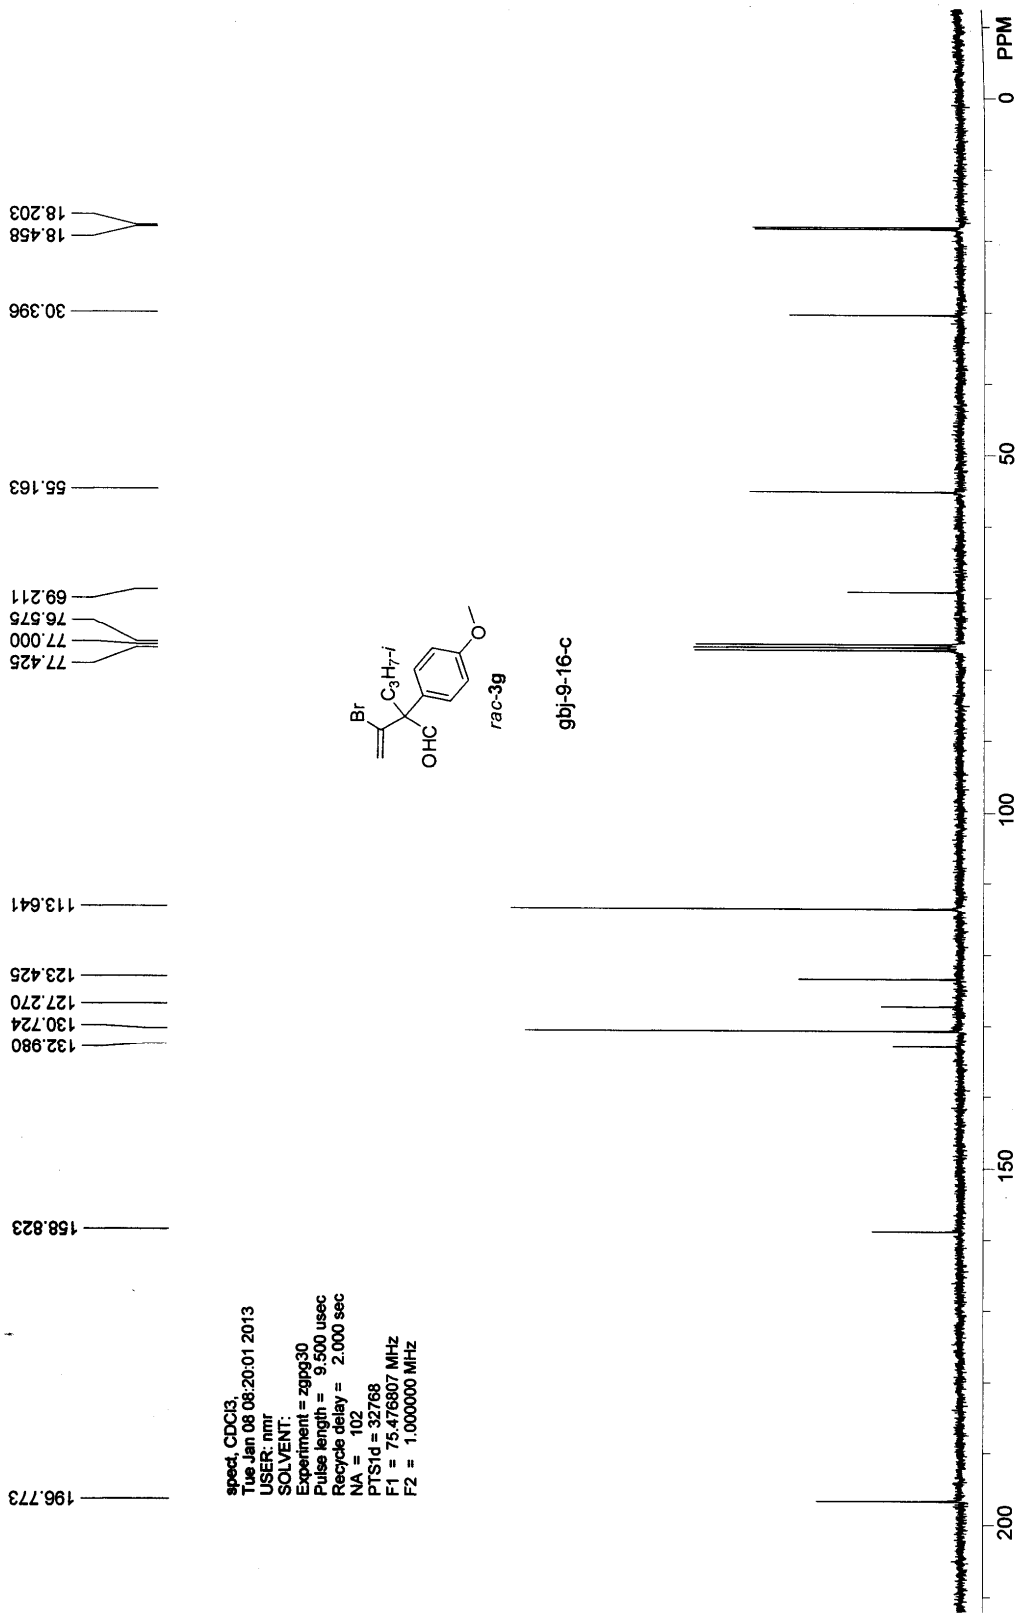

spect, CDC13  
Tue Jan 08 08:20:01 2013  
USER: nmr  
SOLVENT:  
Experiment = zgpg30  
Pulse length = 9.500 usec  
Recycle delay = 2.000 sec  
NA = 102  
PTSD = 32768  
F1 = 75.476807 MHz  
F2 = 1.000000 MHz

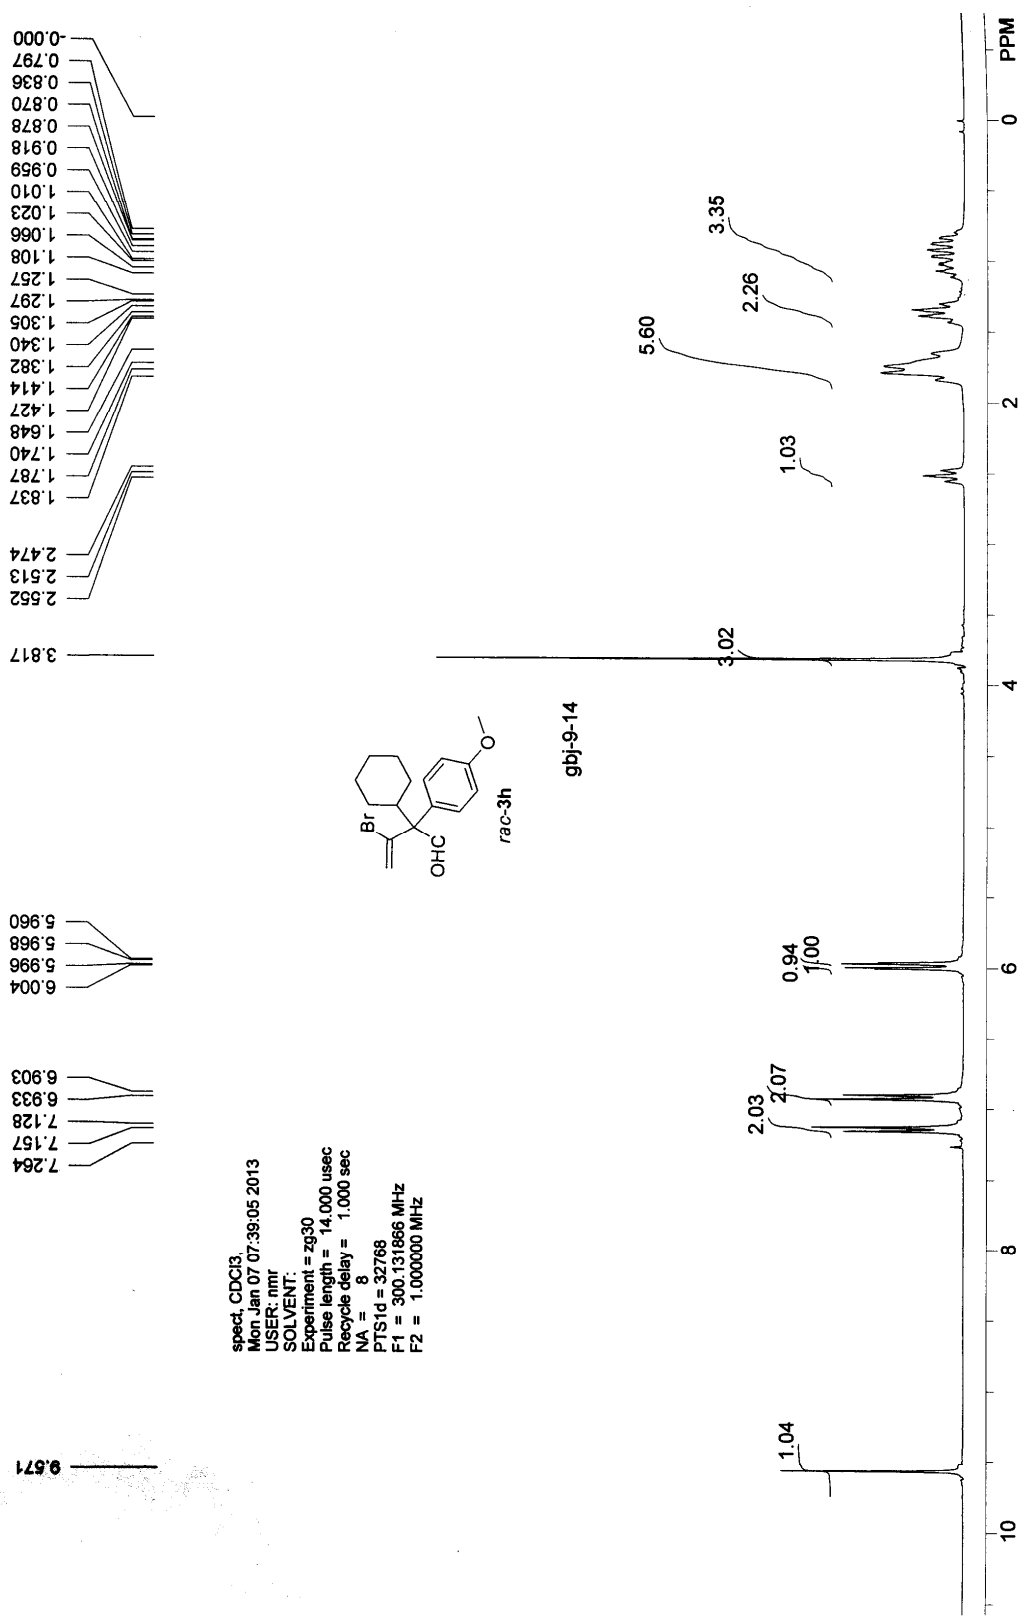

spect, CDCl3,  
 Mon Jan 07 07:39:05 2013  
 USER: nmr  
 SOLVENT: nmr  
 Experiment = zg30  
 Pulse length = 14,000 usec  
 Recycle delay = 1,000 sec  
 NA = 8  
 P1 = 300,131866 MHz  
 F2 = 1,000000 MHz

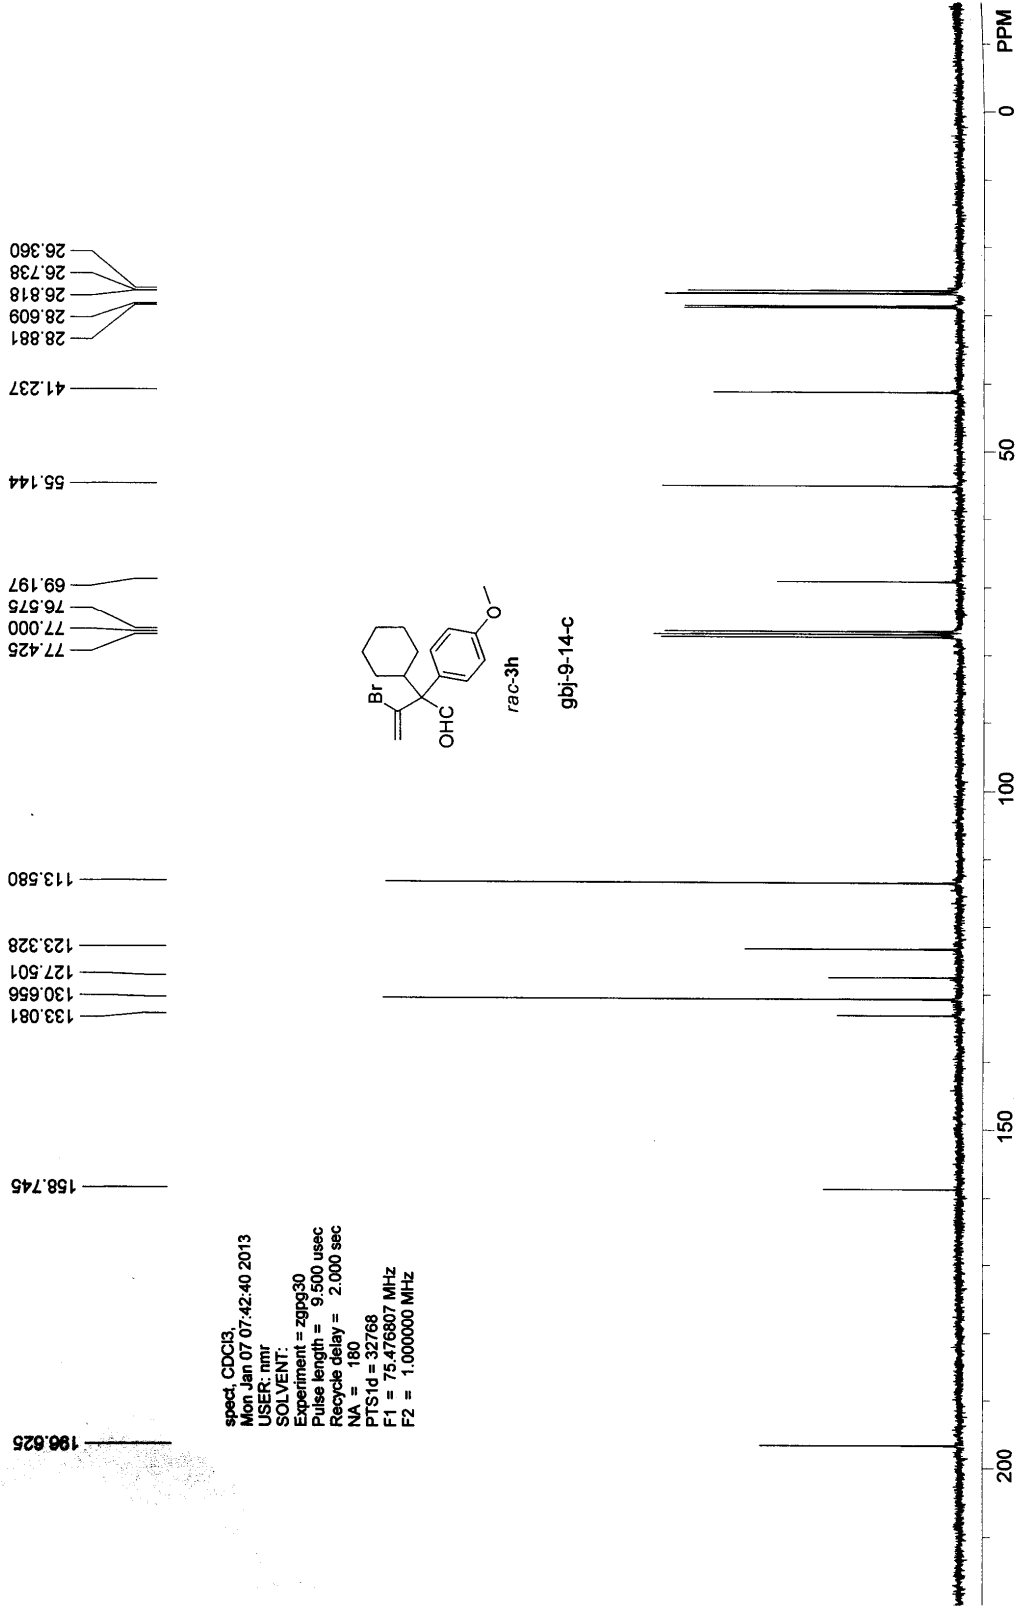

spect. CDC13,  
 Mon Jan 07 07:42:40 2013  
 USER: nmr  
 SOLVENT:  
 Experiment = zgpg30  
 Pulse length = 9.500 usec  
 Recycle delay = 2.000 sec  
 NA = 180  
 P1 = 32768  
 F1 = 75.476807 MHz  
 F2 = 1.000000 MHz

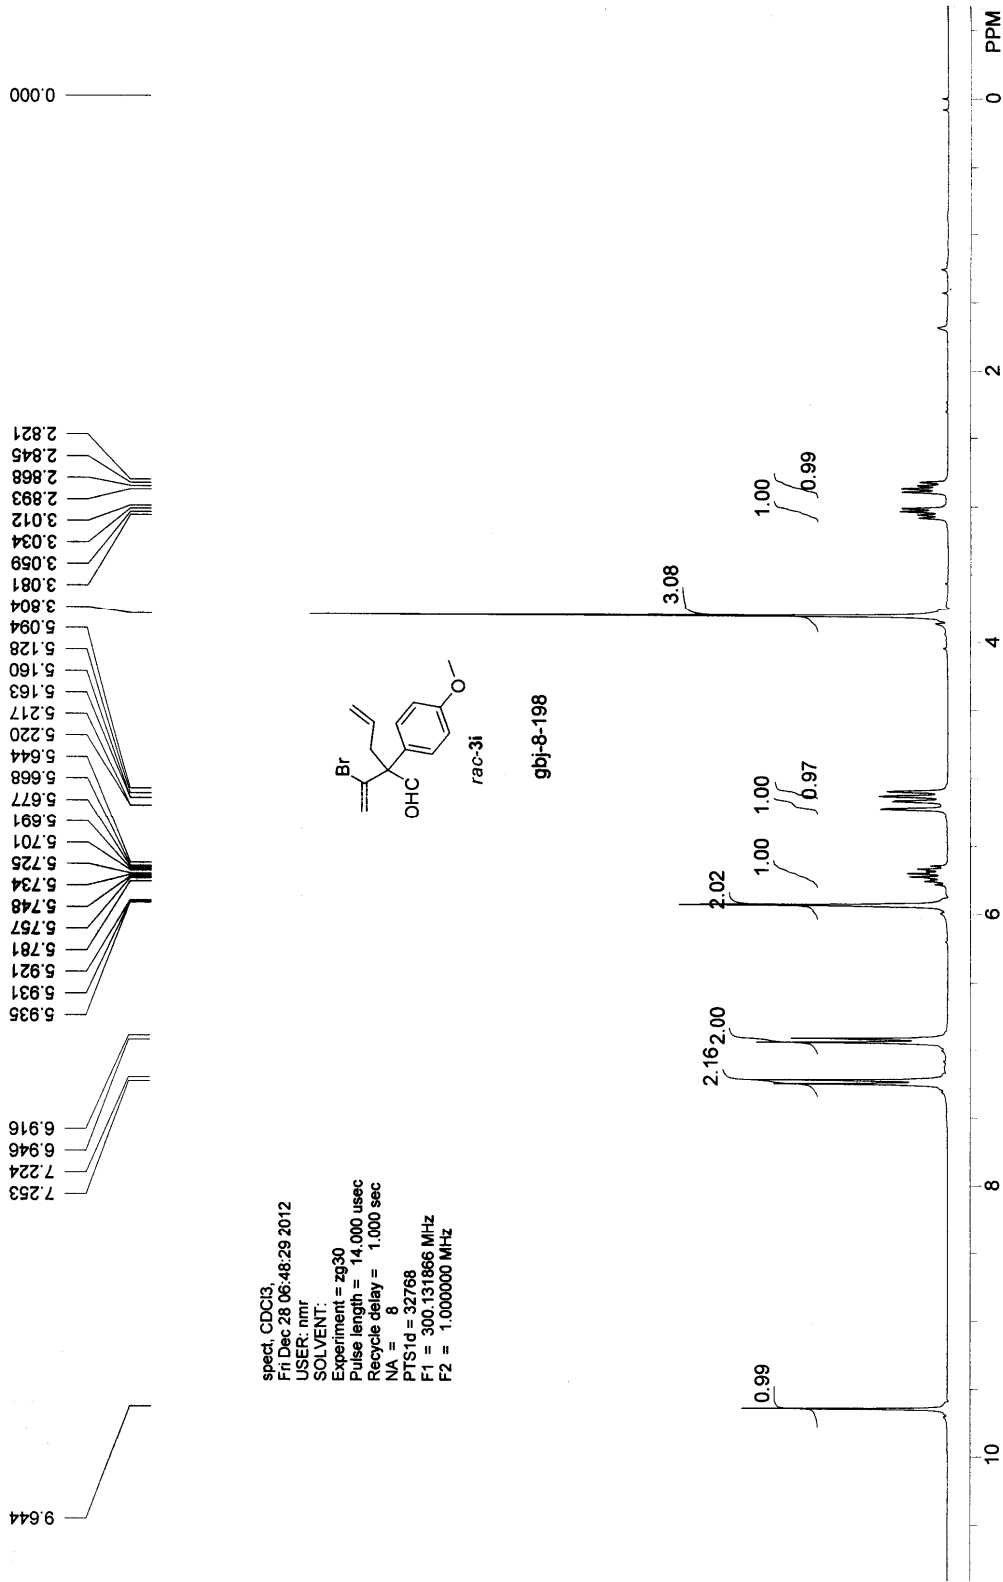



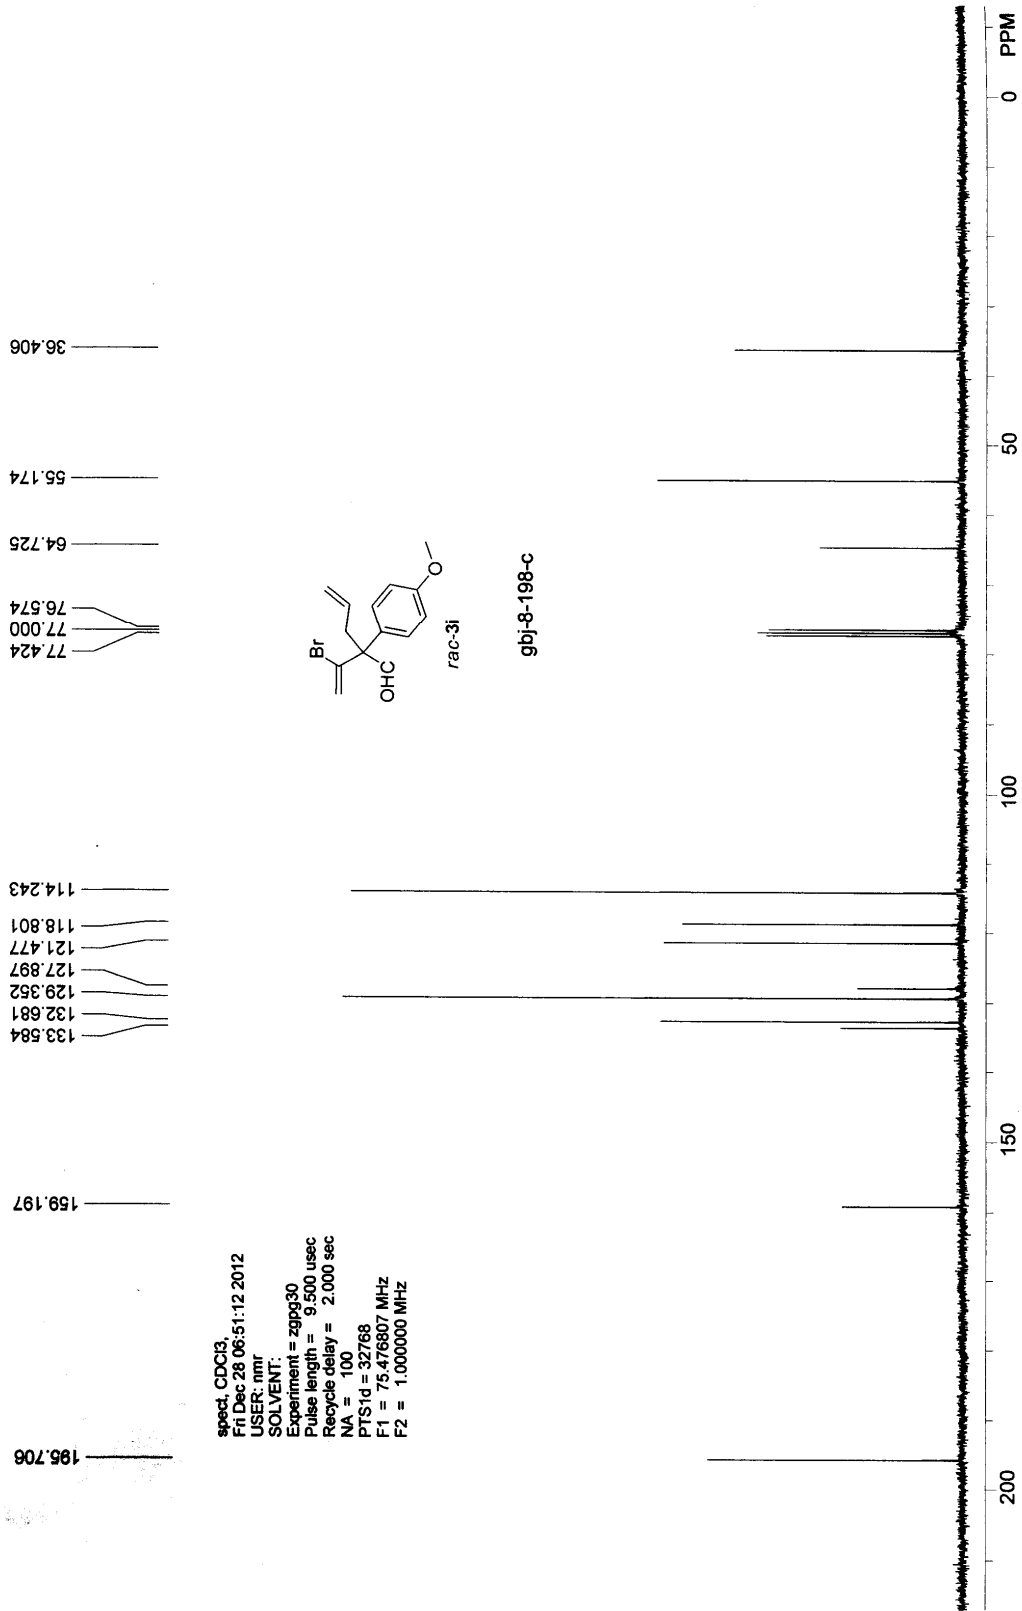

spect, CDCl3  
 Fri Dec 28 06:51:12 2012  
 USER: nmr  
 SOLVENT:  
 Experiment = zgpg30  
 Pulse length = 9.500 usec  
 Recycle delay = 2.000 sec  
 NA = 100  
 P1 = 32768  
 F1 = 75.476807 MHz  
 F2 = 1.000000 MHz

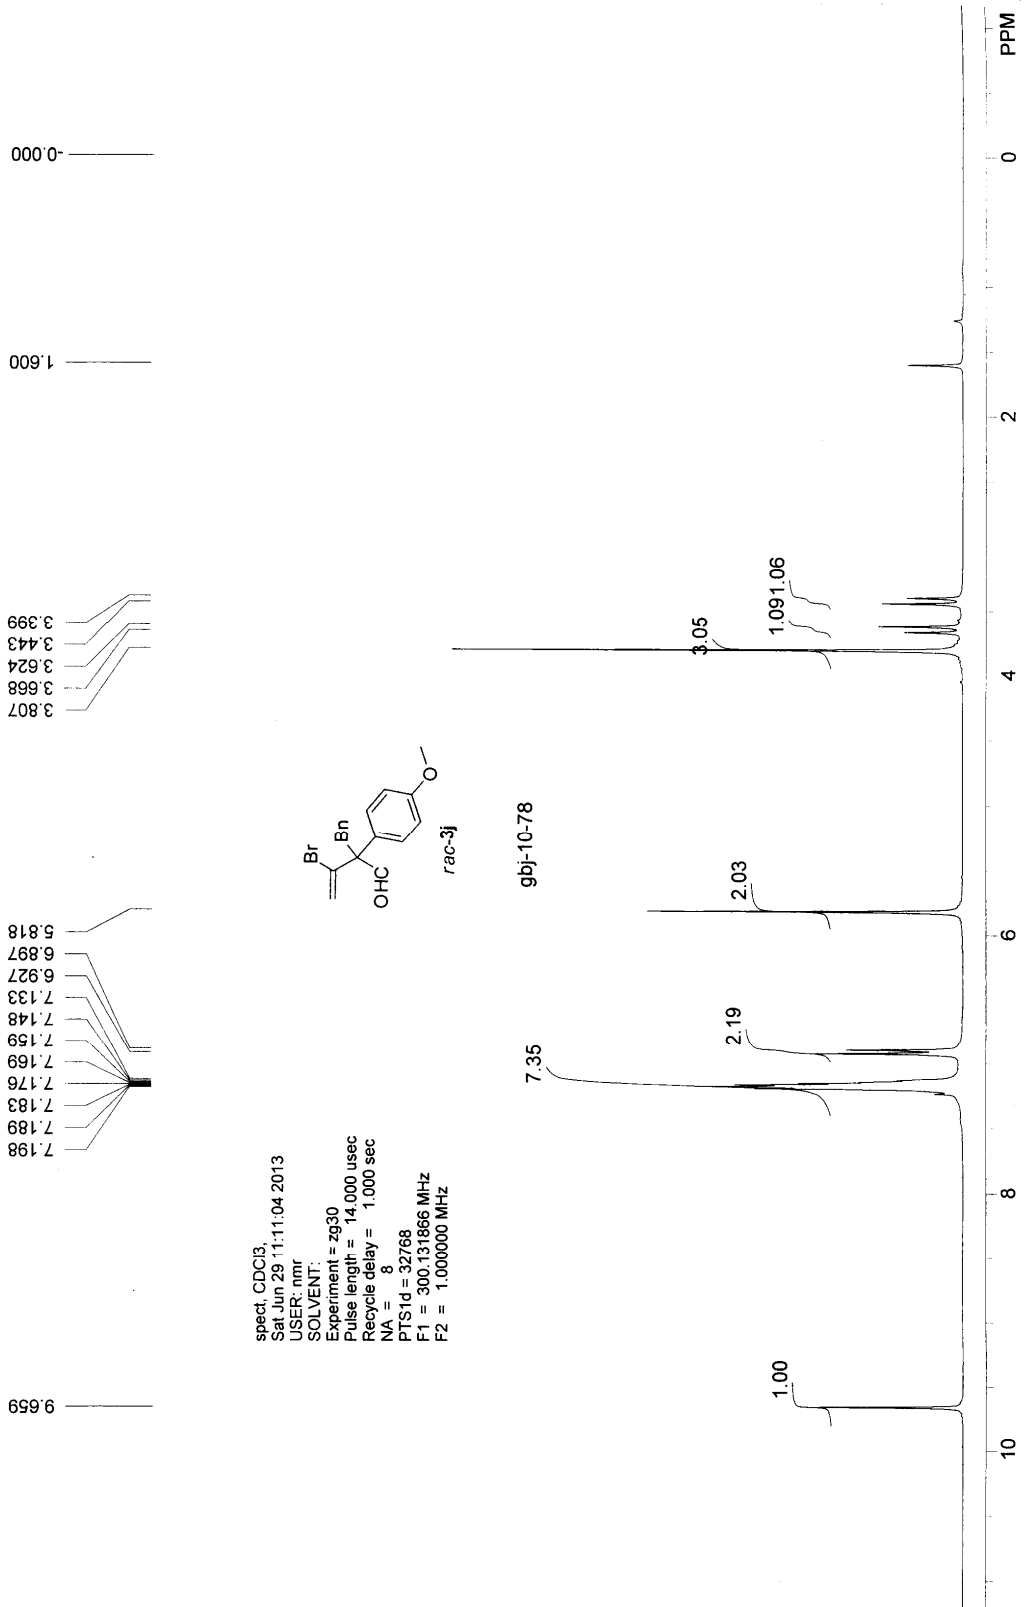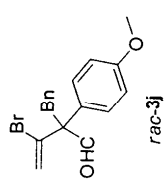

spect: CDC13  
 Sat Jun 29 11:11:04 2013  
 USER: nmr  
 SOLVENT:  
 Experiment = z930  
 Pulse length = 14.000 usec  
 Recycle delay = 1.000 sec  
 NA = 8  
 PTS1d = 32768  
 F1 = 300.131866 MHz  
 F2 = 1.000000 MHz

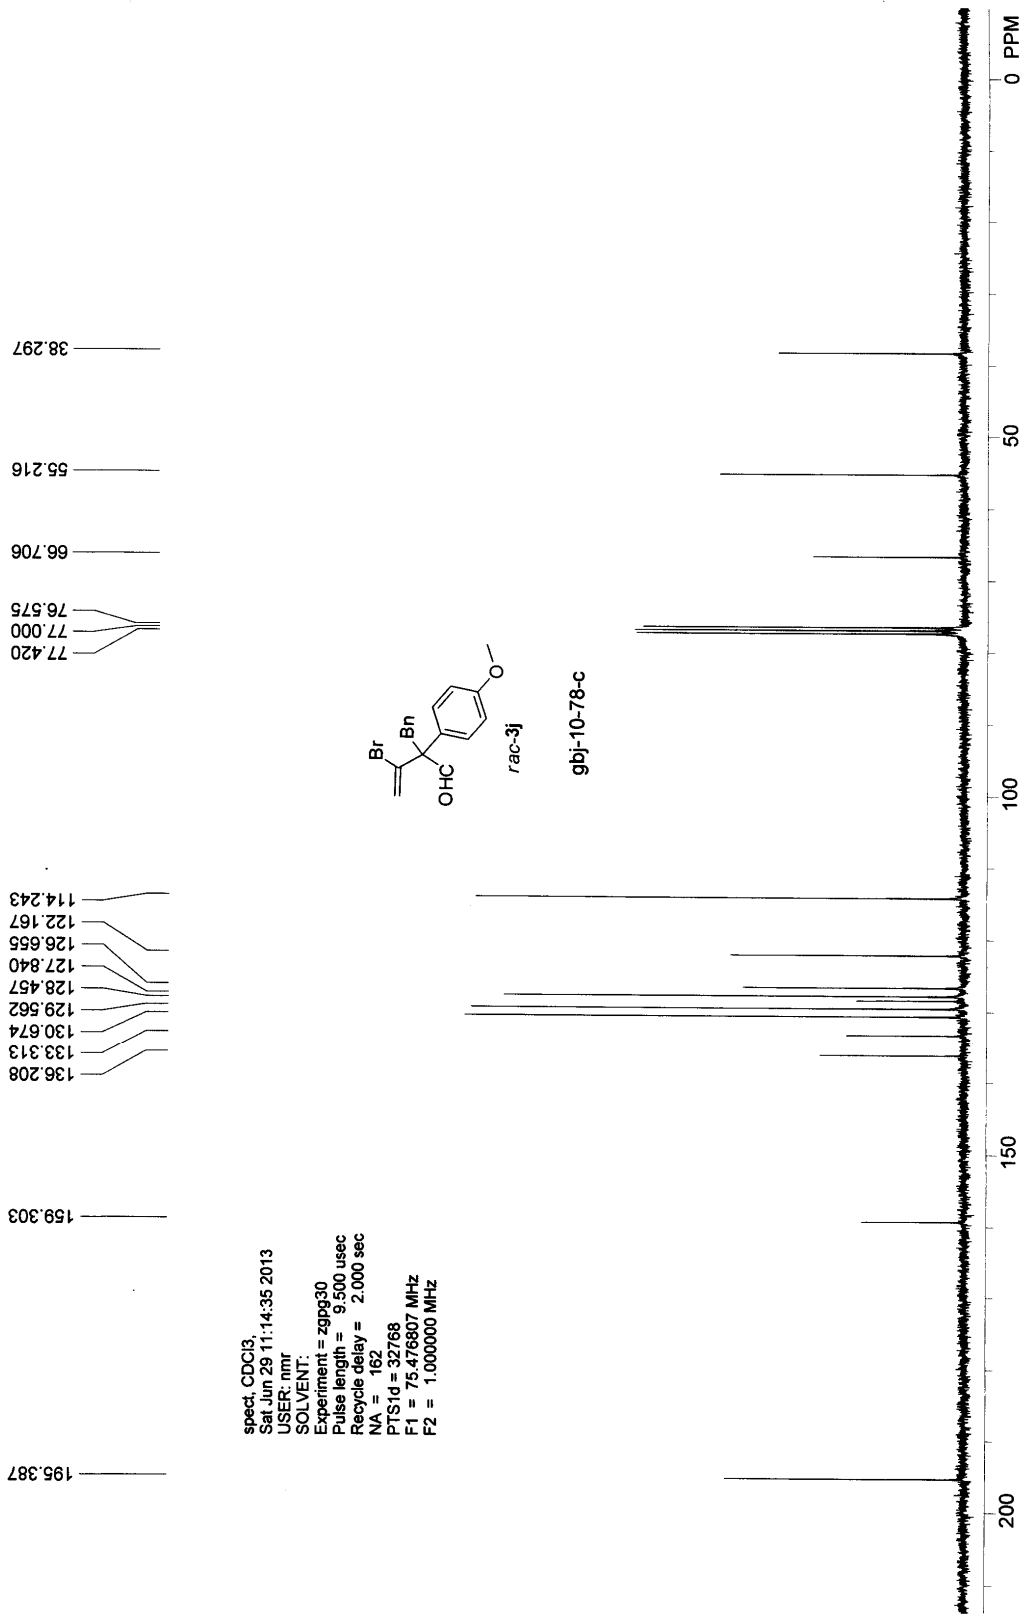

spect, CDC13,  
 Sat Jun 29 11:14:35 2013  
 USER: nmr  
 SOLVENT: nmr  
 Experiment = zgpg30  
 Pulse length = 9.500 usec  
 Recycle delay = 2.000 sec  
 NA = 162  
 P1 = 32768  
 F1 = 75.476807 MHz  
 F2 = 1.000000 MHz

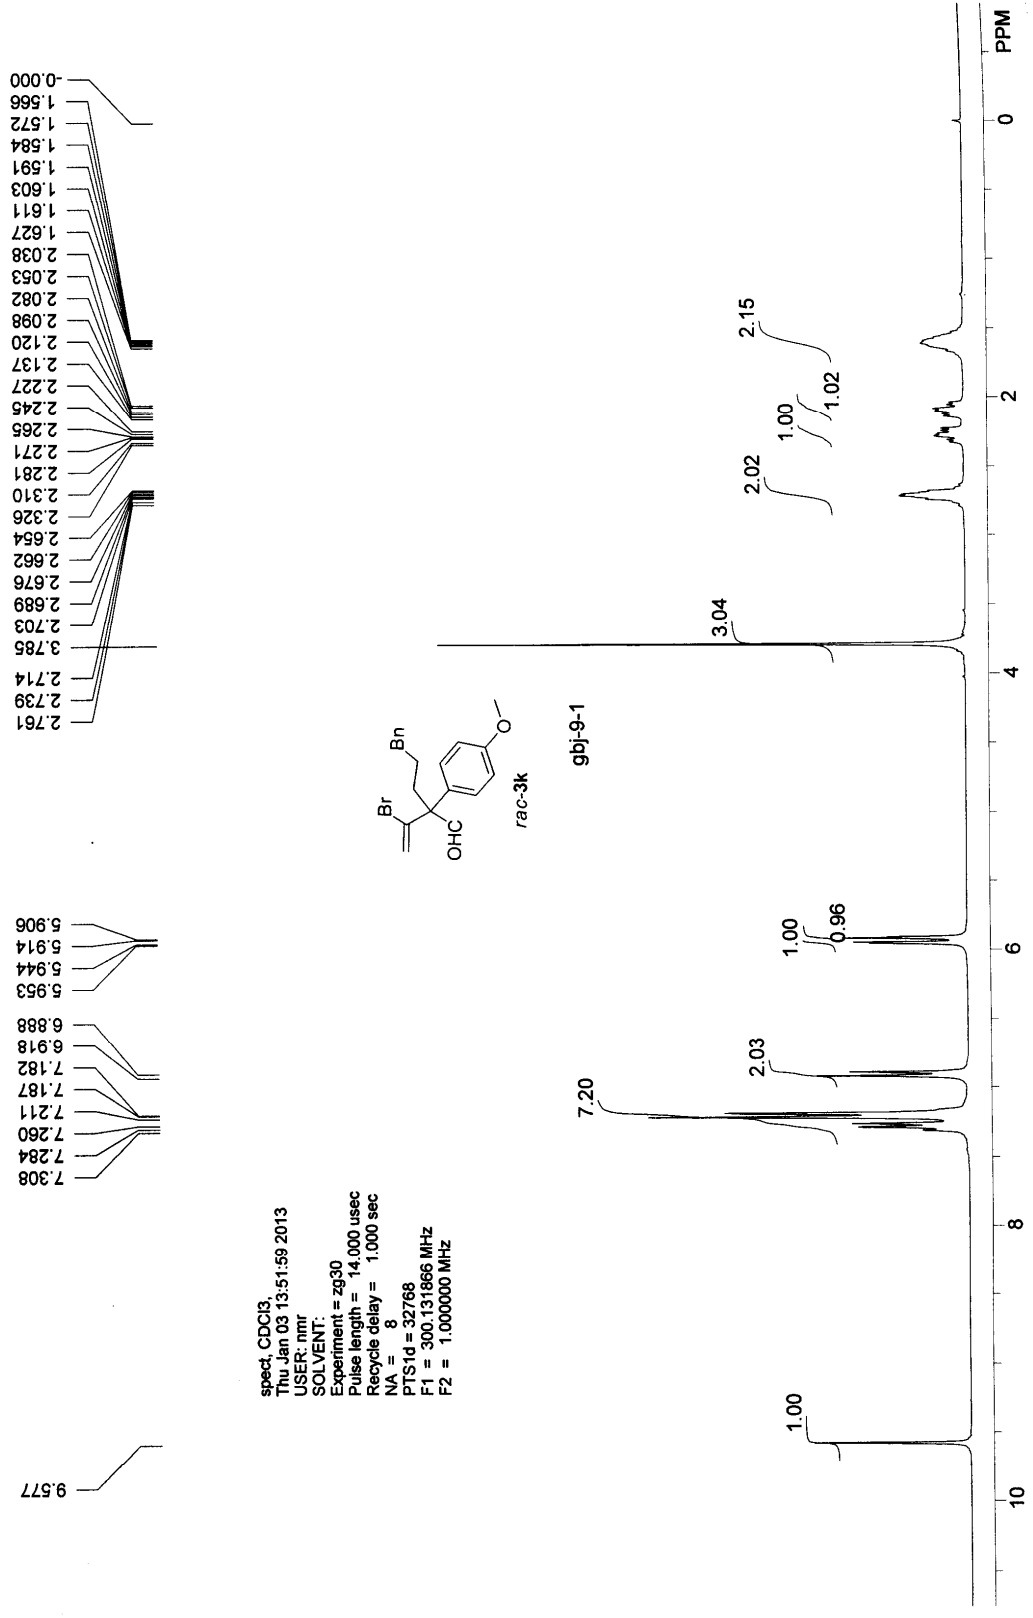

spect, CDCl3,  
 Thu Jan 03 13:51:59 2013  
 USER: nmr  
 SOLVENT:  
 Experiment = zq30  
 Pulse length = 14.000 usec  
 Recycle delay = 1.000 sec  
 NA = 8  
 P1 = 32768  
 F1 = 300.131866 MHz  
 F2 = 1.000000 MHz

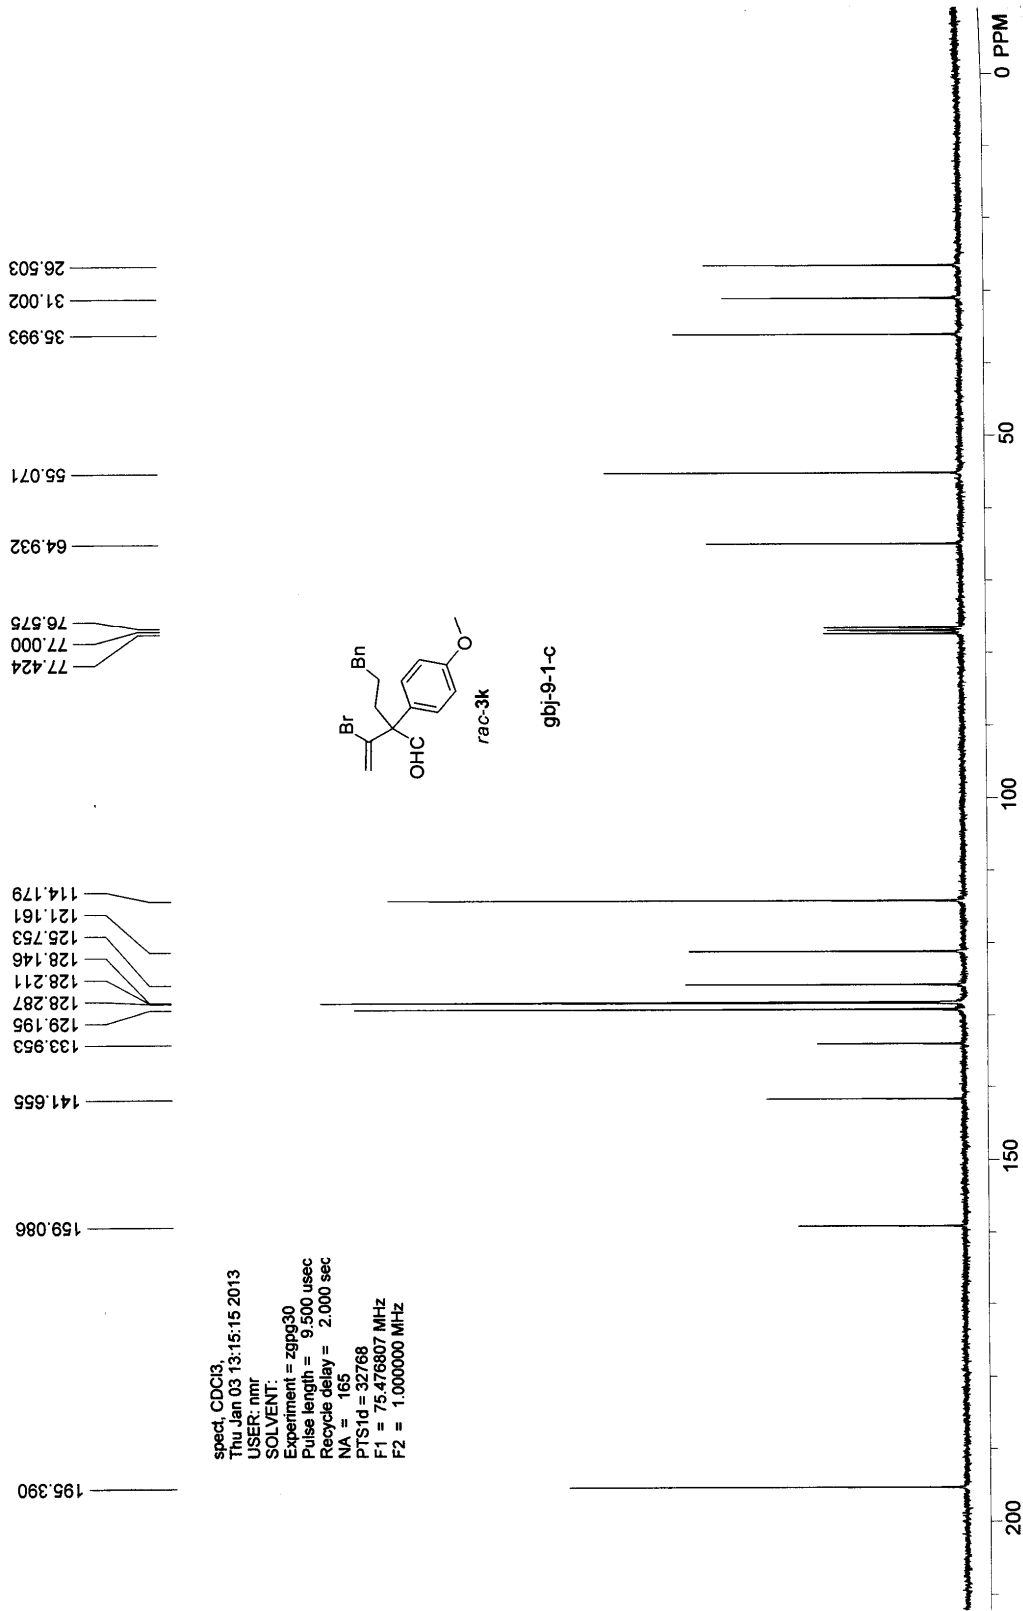

spect, CDC13,  
 Thu Jan 03 13:15:15 2013  
 USER: nmr  
 SOLVENT:  
 Experiment = zgpg30  
 Pulse length = 9.500 usec  
 Recycle delay = 2.000 sec  
 NA = 165  
 PTS1d = 32768  
 F1 = 75.476807 MHz  
 F2 = 1.0000000 MHz

-0.000

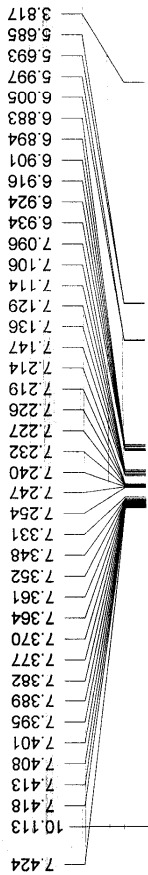

spectr\_CDCB3  
Fri Feb 14 11:05:00 2014  
USER: nmr  
SOLVENT: mnr  
Experiment = zg30  
Pulse length = 14.000 usec  
Recycle delay = 1.000 sec  
NA = 8  
PTS1d = 32768  
F1 = 300.131666 MHz  
F2 = 1.000000 MHz

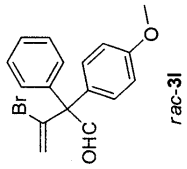

gbj-11-144

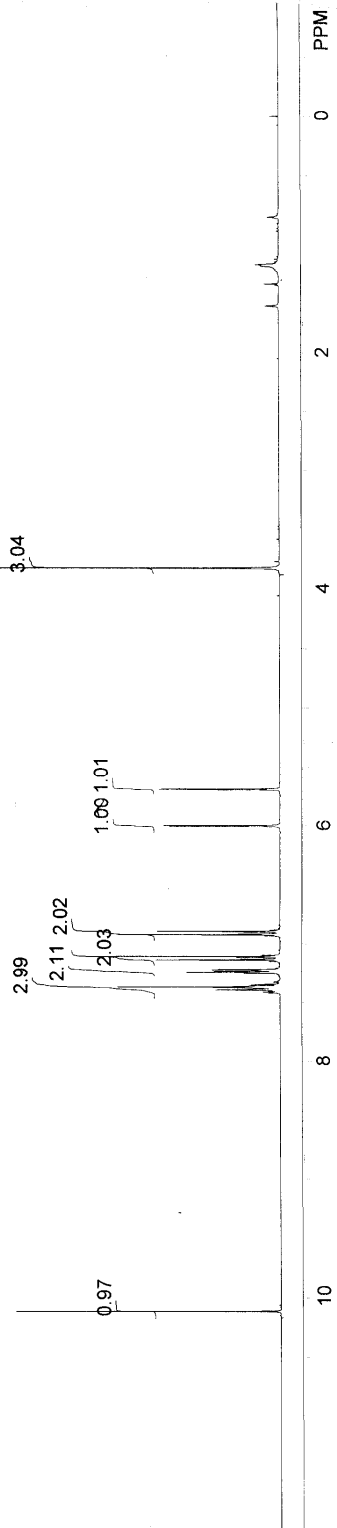

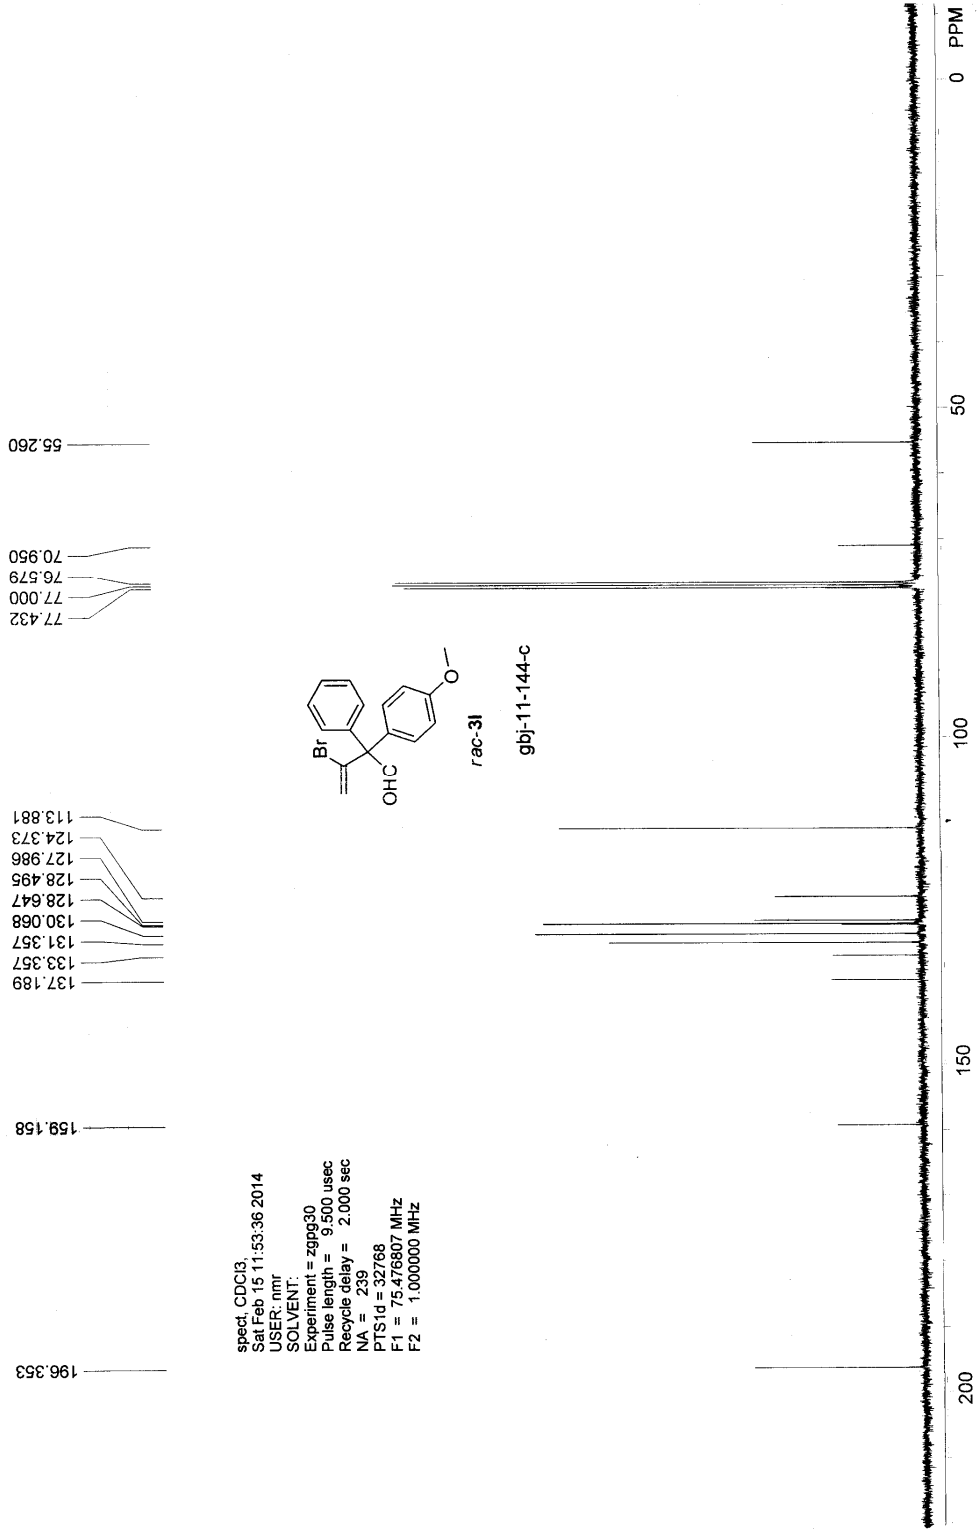

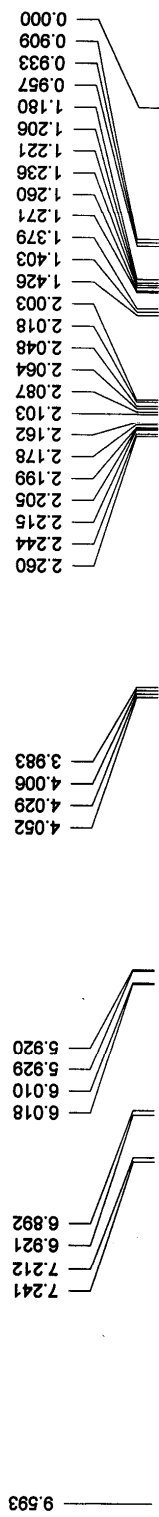

spect\_CDCI3  
 Thu Jan 17 07:34:49 2013  
 USER: nmr  
 SOLVENT:  
 Experiment = zg30  
 Pulse length = 14.000 usec  
 Recycle delay = 1.000 sec  
 NA = 8  
 P1 = 32768  
 F1 = 300.131866 MHz  
 F2 = 1.000000 MHz

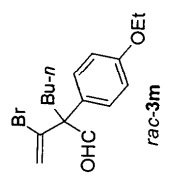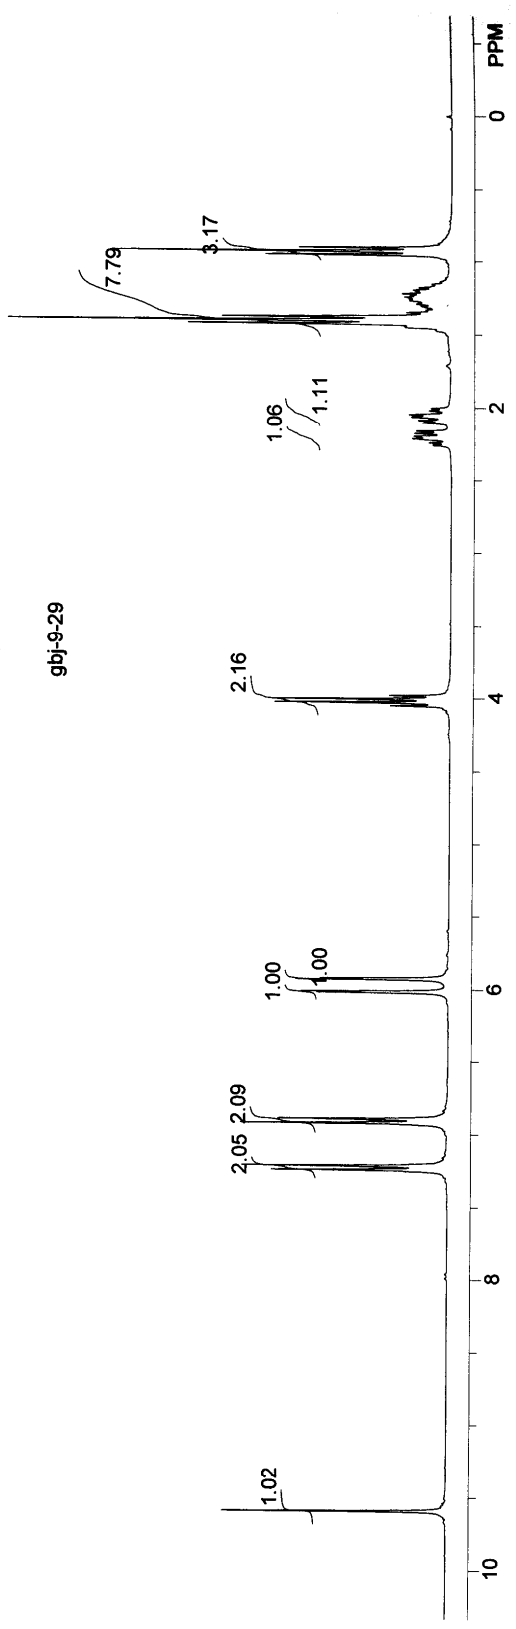



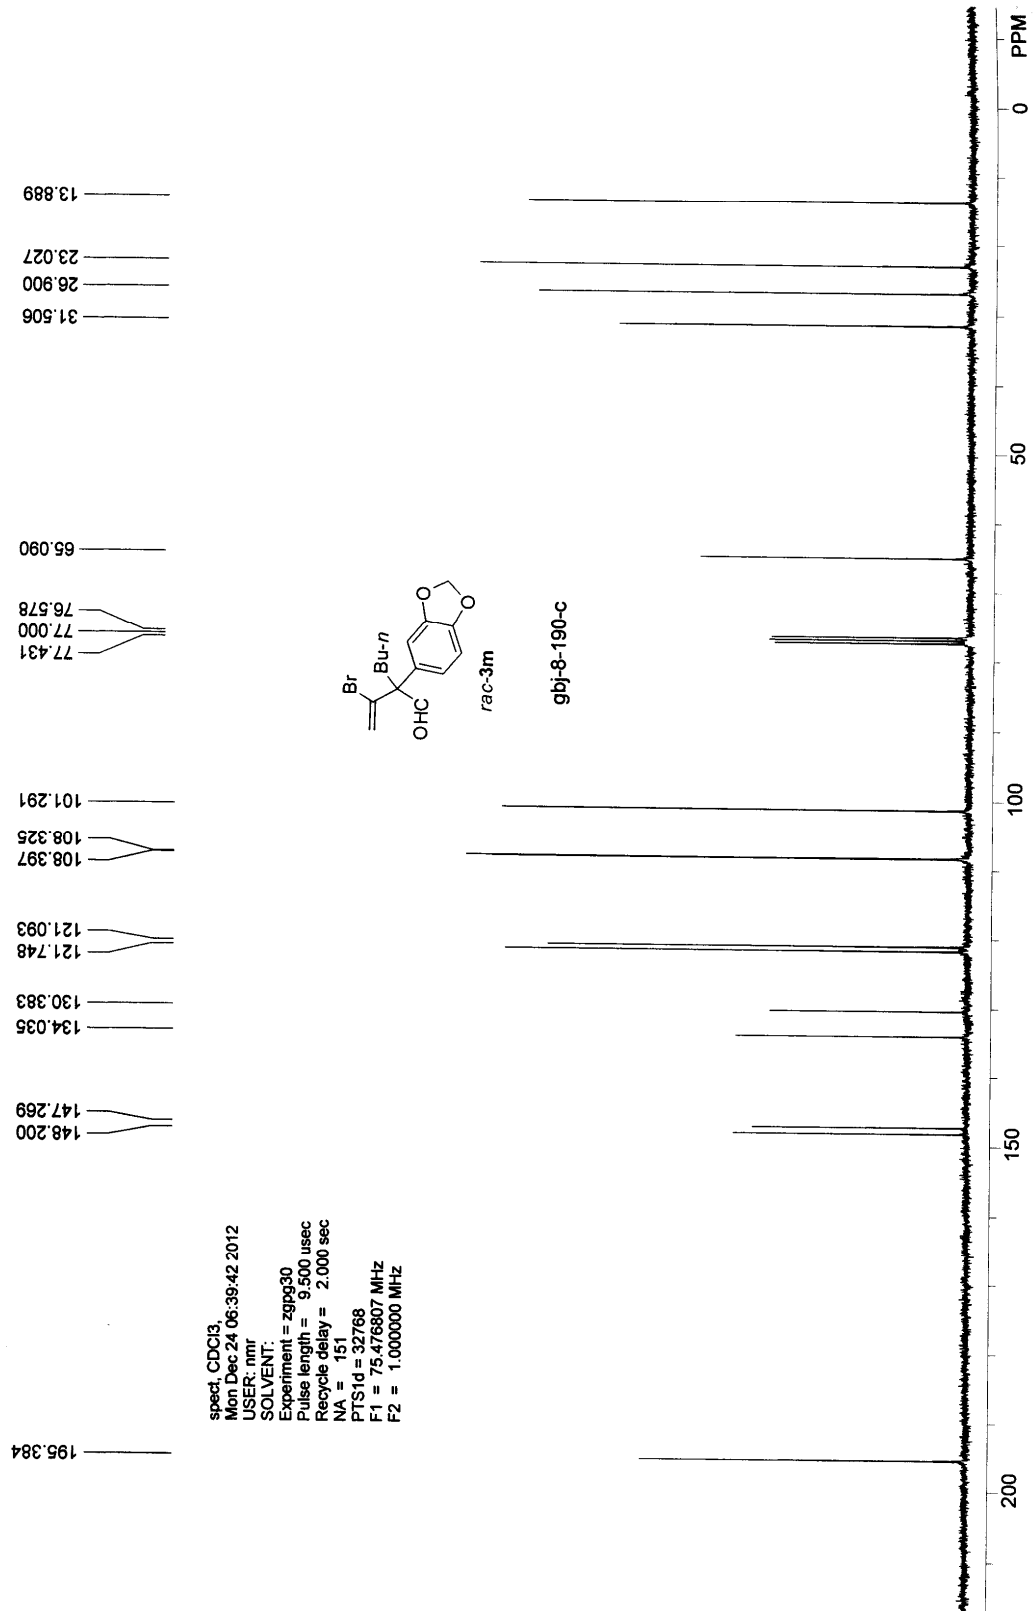

spect, CDCl3,  
 Mon Dec 24 06:39:42 2012  
 USER: nmr  
 SOLVENT:  
 Experiment = zgpg30  
 Pulse length = 9.500 usec  
 Recycle delay = 2.000 sec  
 NA = 151  
 PTS1d = 32768  
 F1 = 75.476807 MHz  
 F2 = 1.000000 MHz

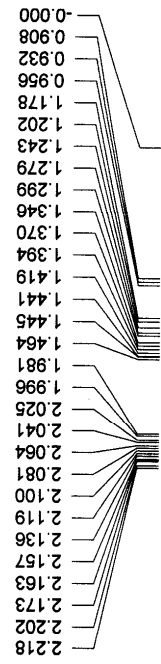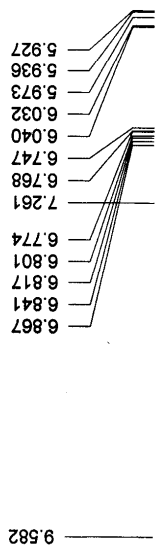

spec1, CDC13,  
Tue Dec 25 12:37:11 2012  
USER: nmr  
SOLVENT:  
Experiment = zg30  
Pulse length = 14.000 usec  
Recycle delay = 1.000 sec  
NA = 8  
PTS1d = 32768  
F1 = 300.131866 MHz  
F2 = 1.000000 MHz

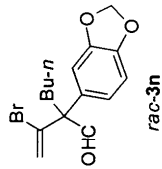

gbj-8-190

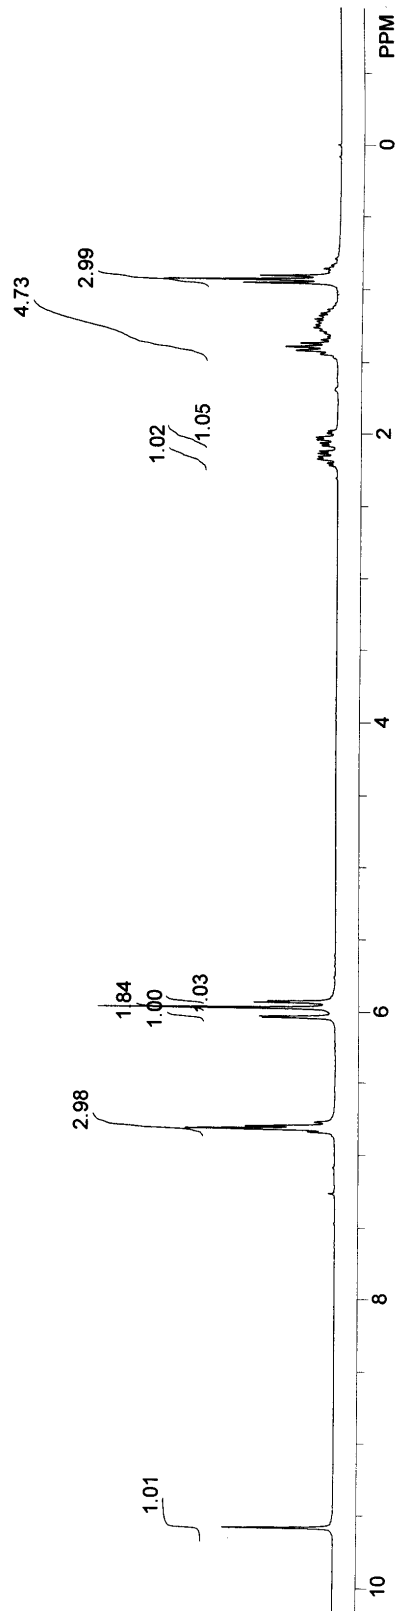

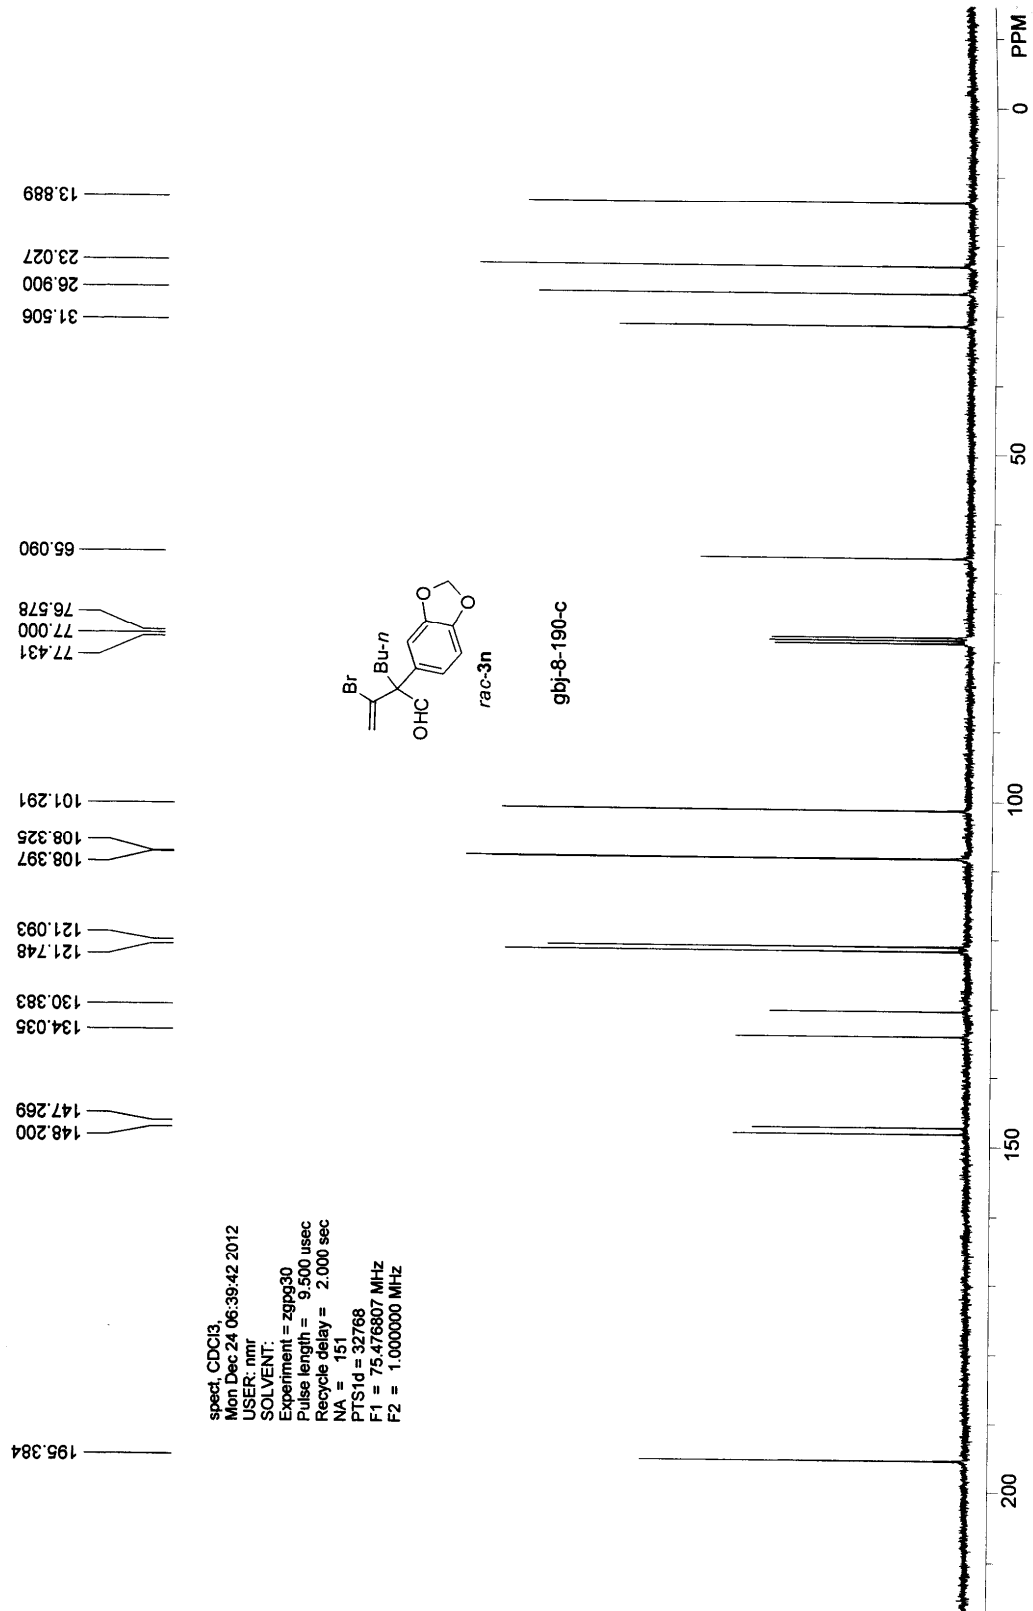

spect, CDCl3,  
 Mon Dec 24 06:39:42 2012  
 USER: nmr  
 SOLVENT:  
 Experiment = z9p930  
 Pulse length = 9.500 usec  
 Recycle delay = 2.000 sec  
 NA = 151  
 PTS1d = 32768  
 F1 = 75.476807 MHz  
 F2 = 1.000000 MHz

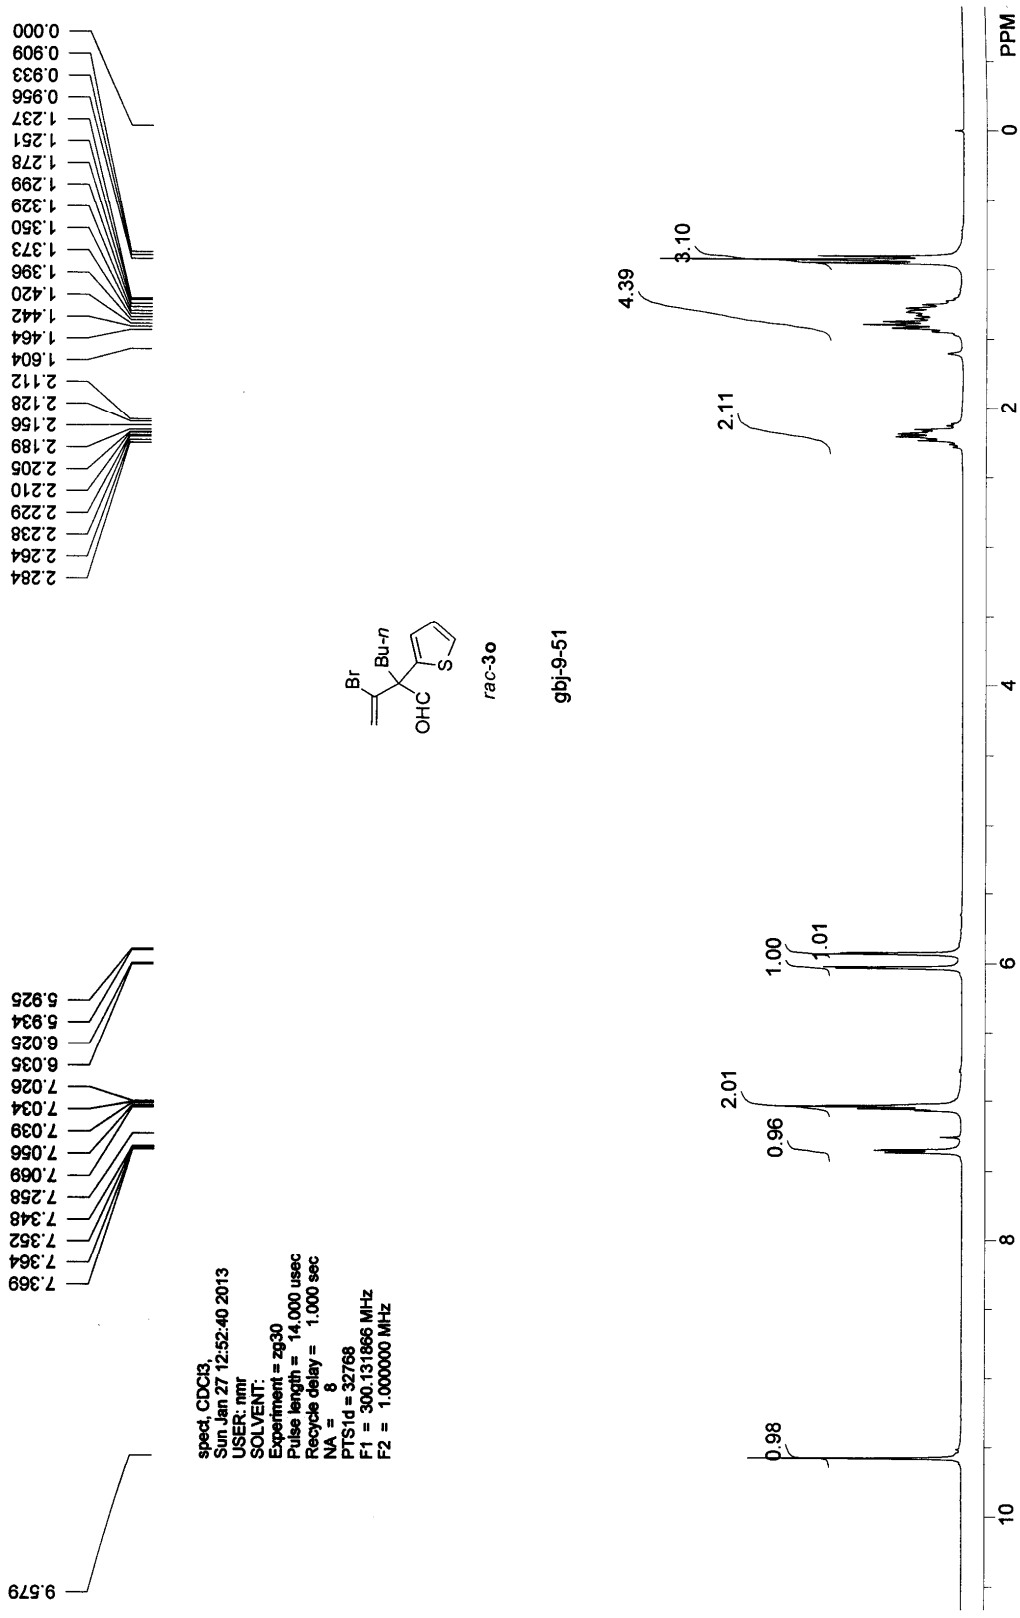

spec1, CDCl3,  
 Sun Jan 27 12:52:40 2013  
 USER: nmr  
 SOLVENT:  
 Experiment = zg30  
 Pulse length = 14.000 usec  
 Recycle delay = 1.000 sec  
 NA = 8  
 PTS1d = 32768  
 F1 = 300.131866 MHz  
 F2 = 1.000000 MHz

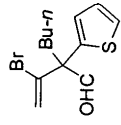

gbj-9-51

spect, CDCl3,  
 Sun Jan 27 12:56:18 2013  
 USER: nmr  
 SOLVENT:  
 Experiment = z9p30  
 Pulse length = 9.500 usec  
 Recycle delay = 2.000 sec  
 NA = 152  
 PTS1d = 32768  
 F1 = 75.476807 MHz  
 F2 = 1.0000000 MHz

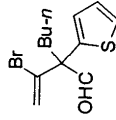

gbl-6-51-c

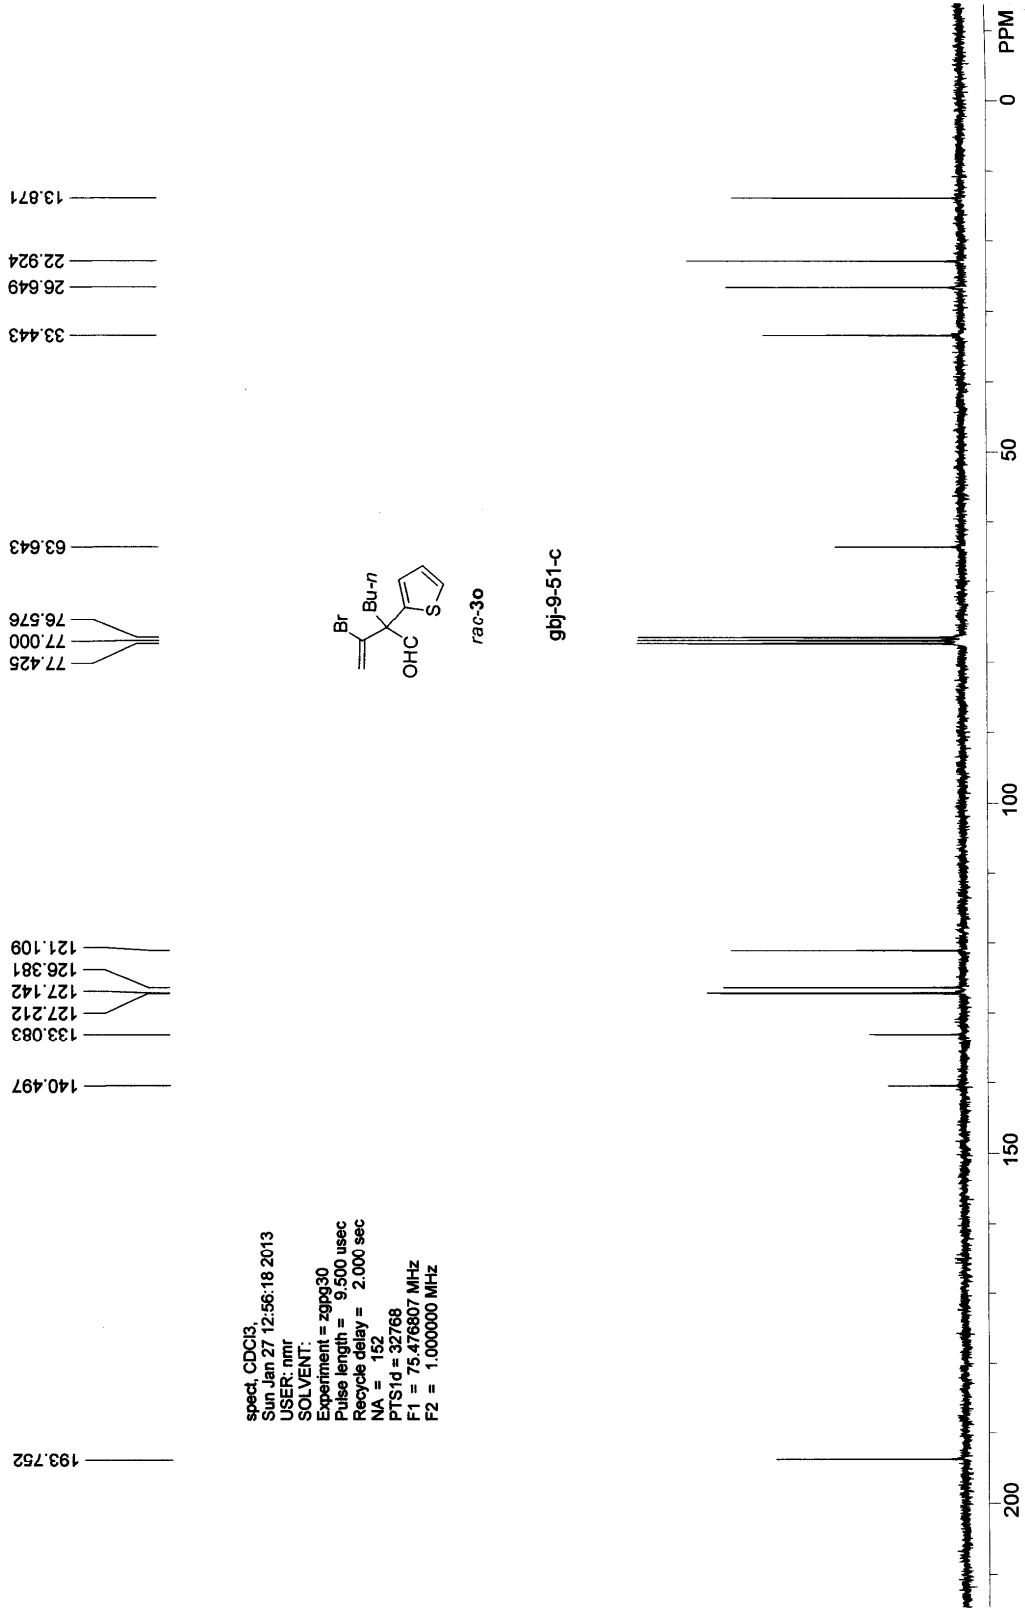

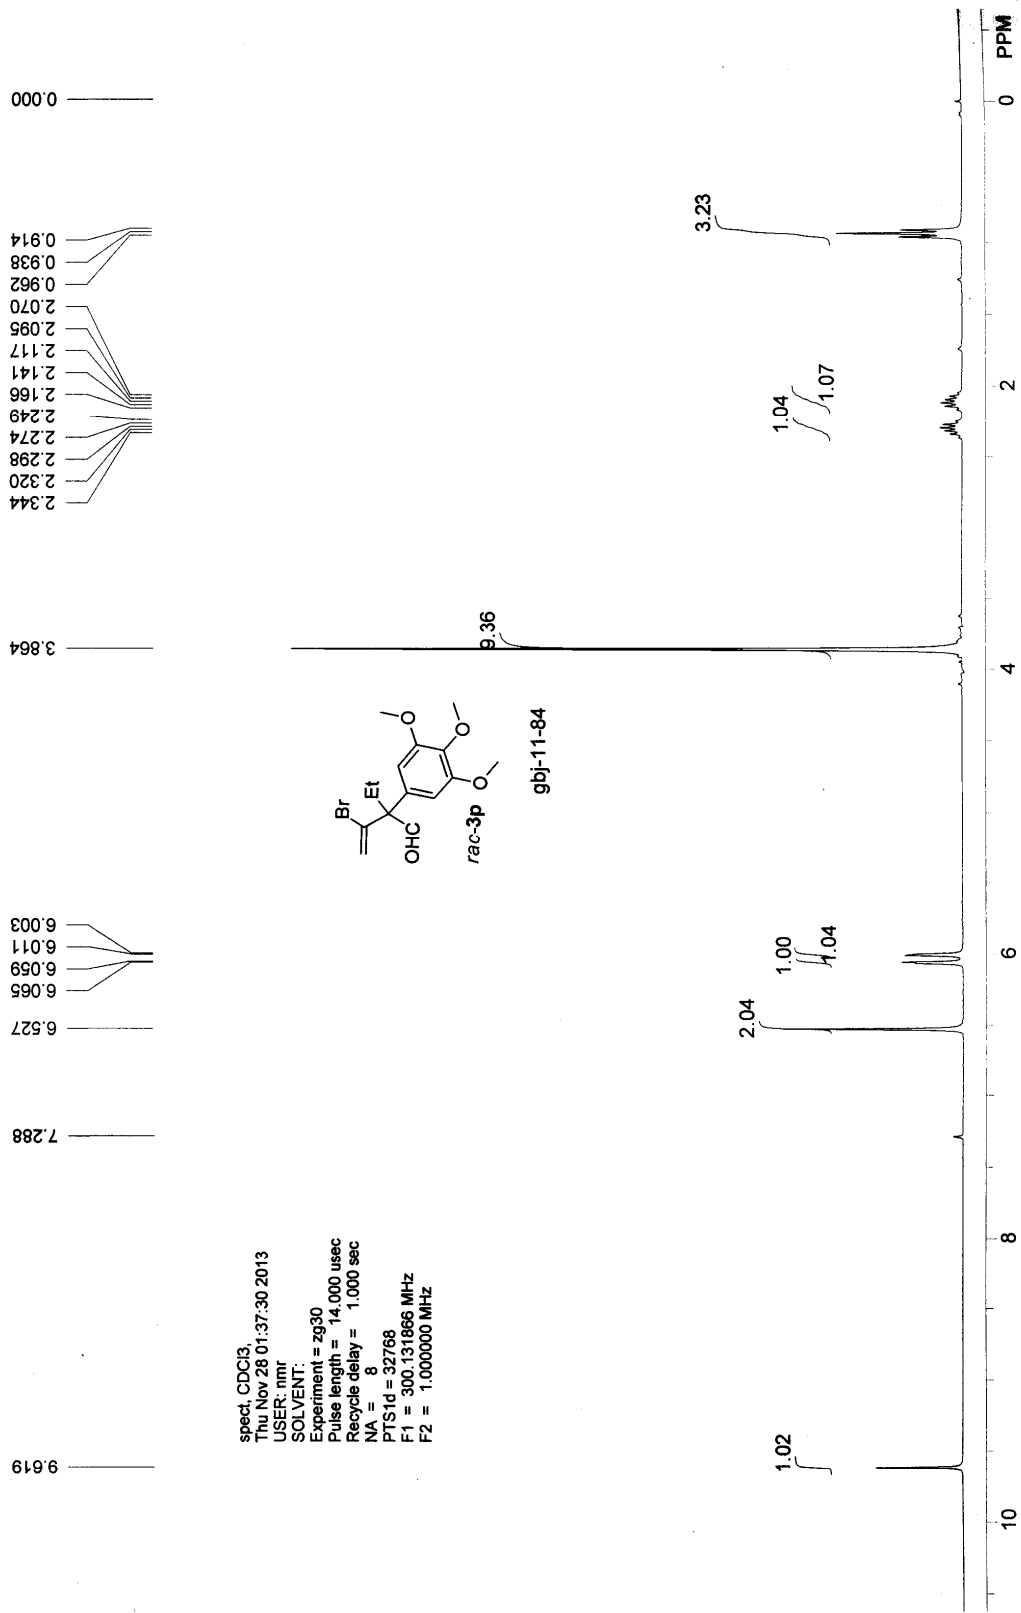

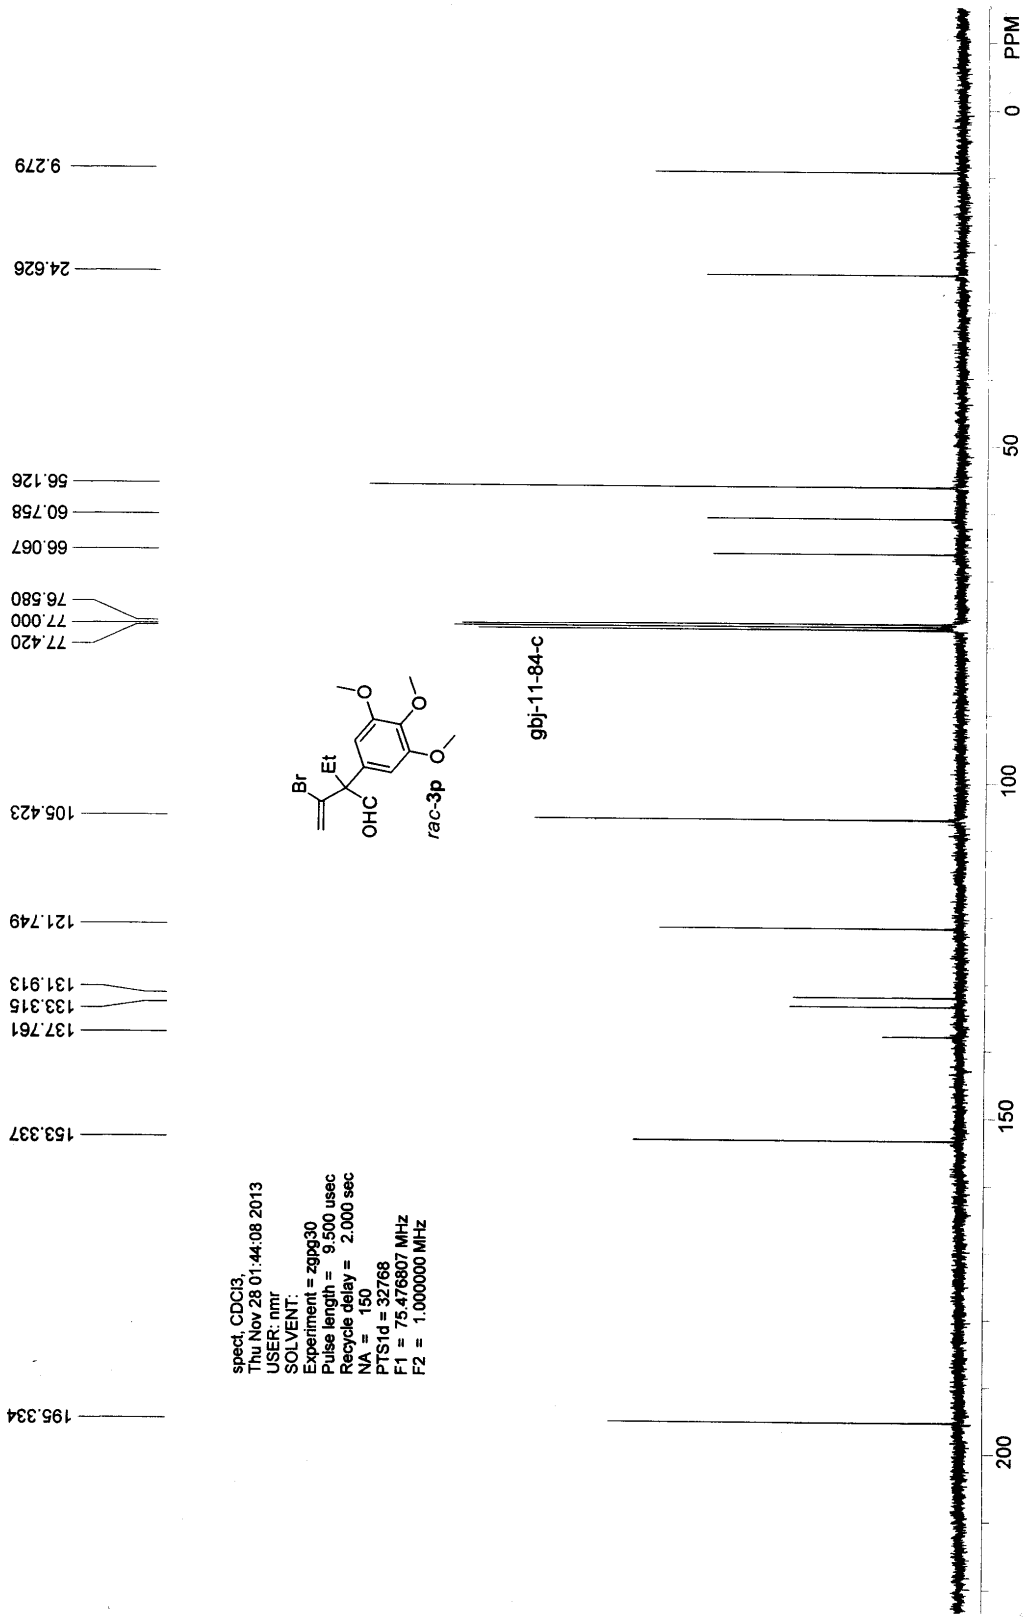

spect, CDC13,  
Thu Nov 28 01:44:08 2013  
USER: nmr  
SOLVENT:  
Experiment = zgpg30  
Pulse length = 9.500 usec  
Recycle delay = 2.000 sec  
NA = 150  
PTSD1d = 32768  
F1 = 75.476807 MHz  
F2 = 1.000000 MHz

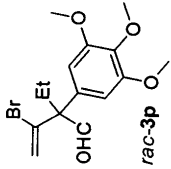

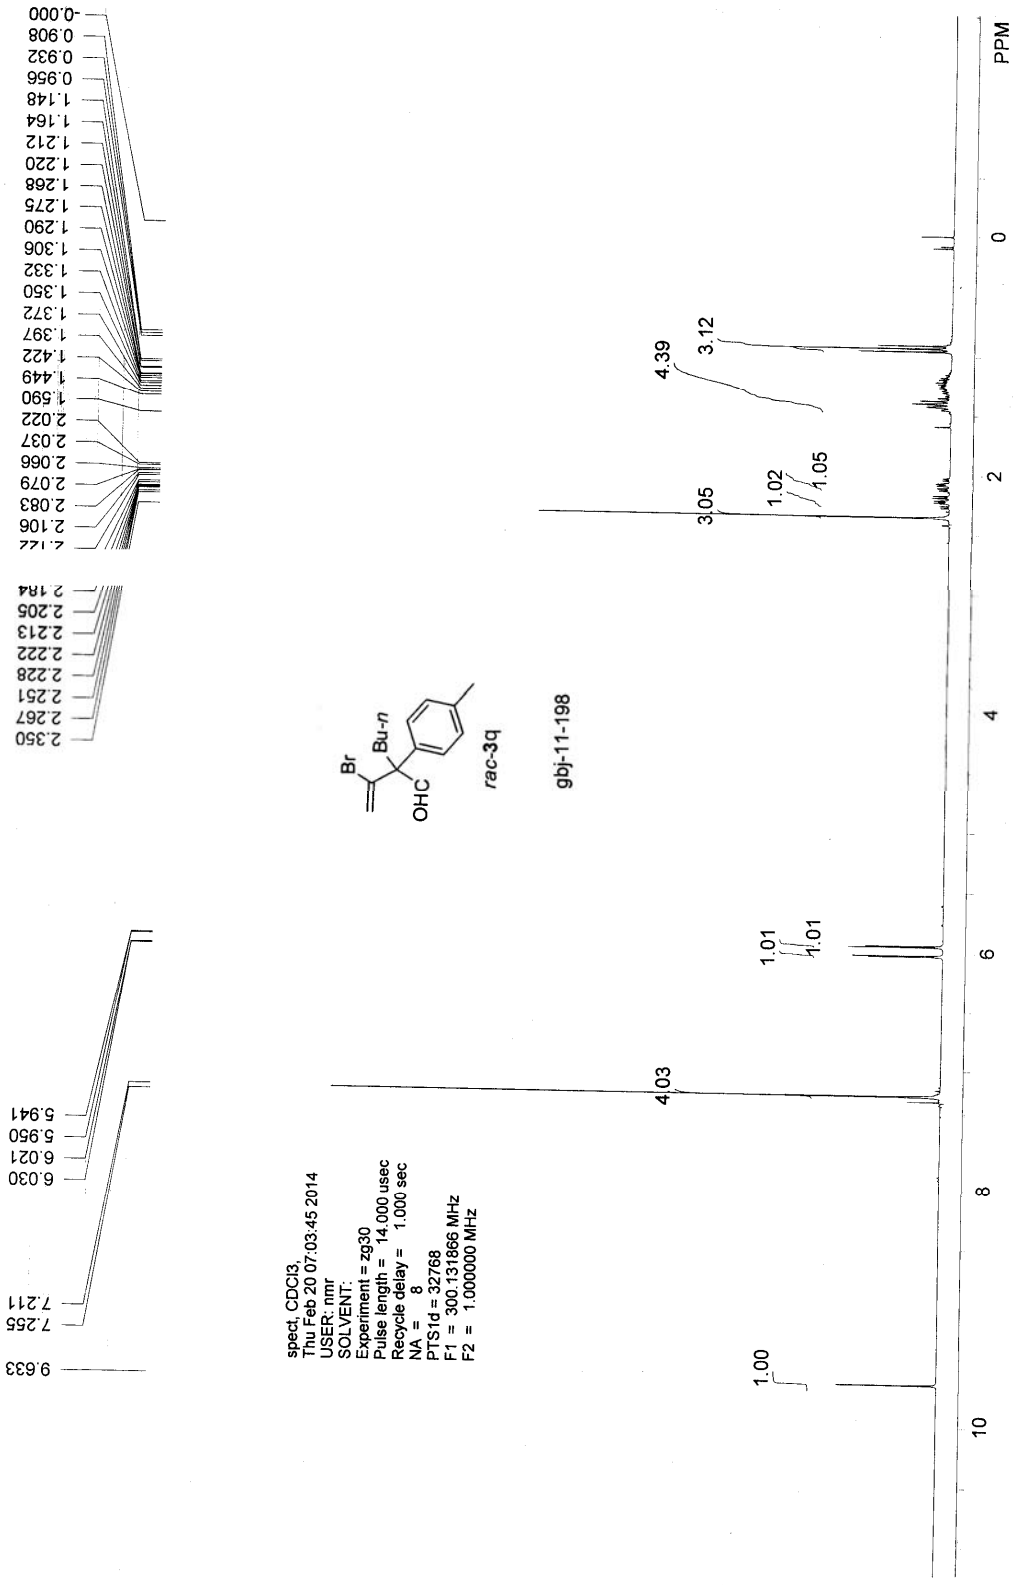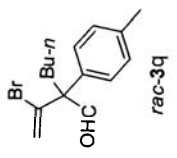

gbj-11-198



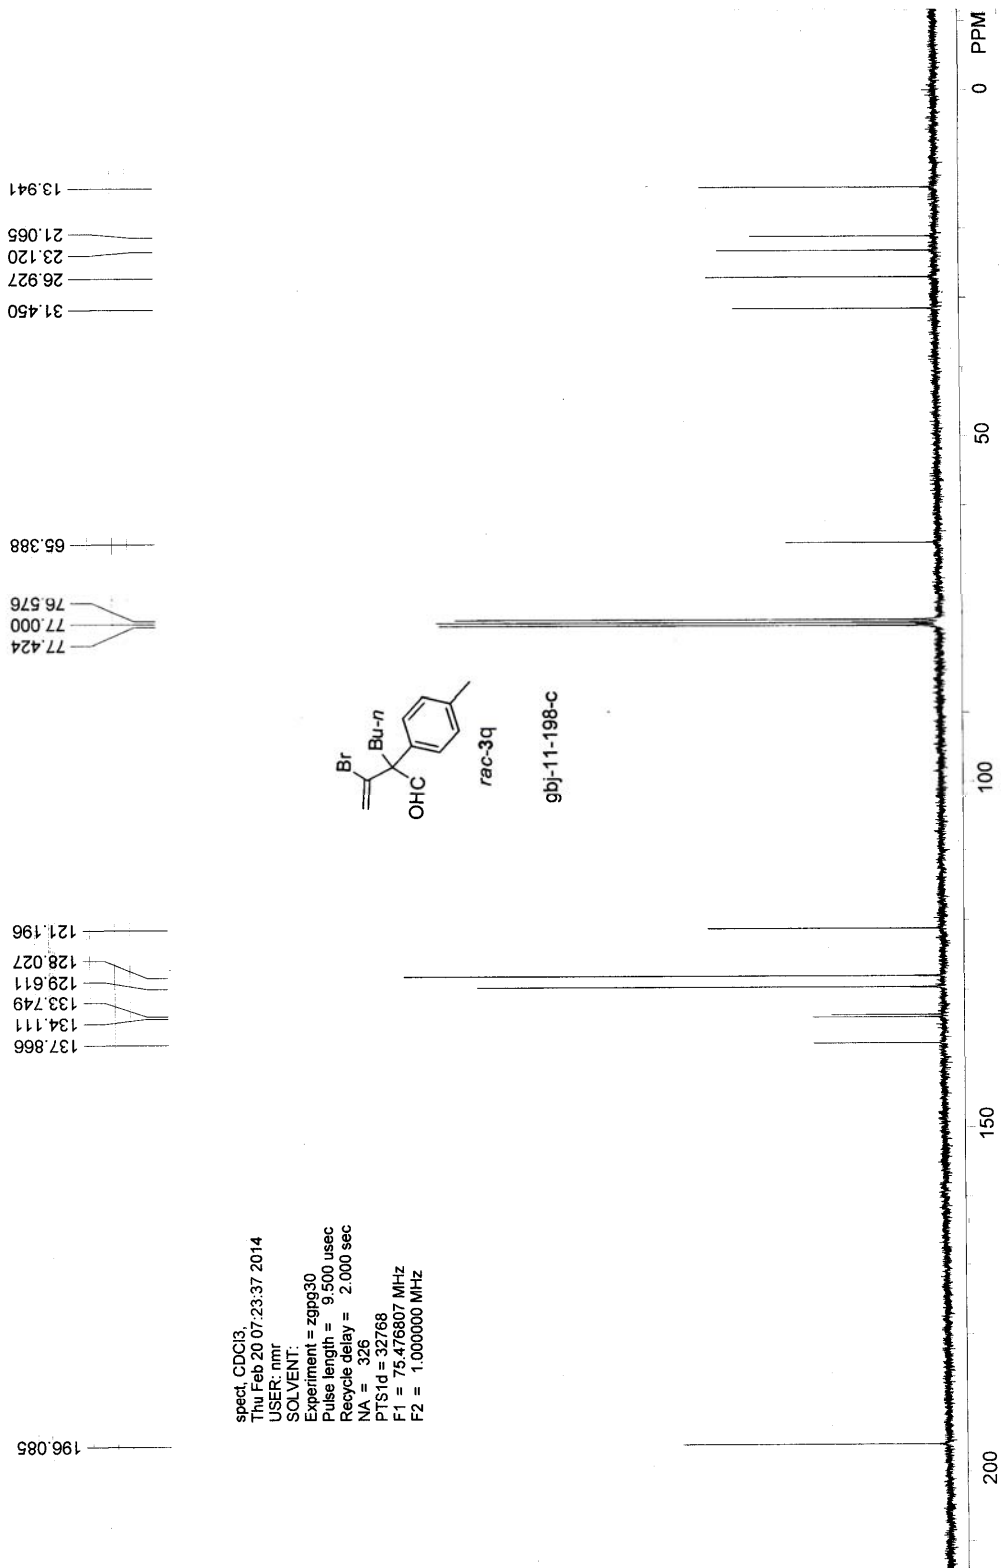

spect, CDCl3,  
 Thu Feb 20 07:23:37 2014  
 USER: nmr  
 SOLVENT:  
 Experiment = zgpg30  
 Pulse length = 9.500 usec  
 Recycle delay = 2.000 sec  
 NA = 326  
 P1 = 32768  
 F1 = 75.476807 MHz  
 F2 = 1.000000 MHz

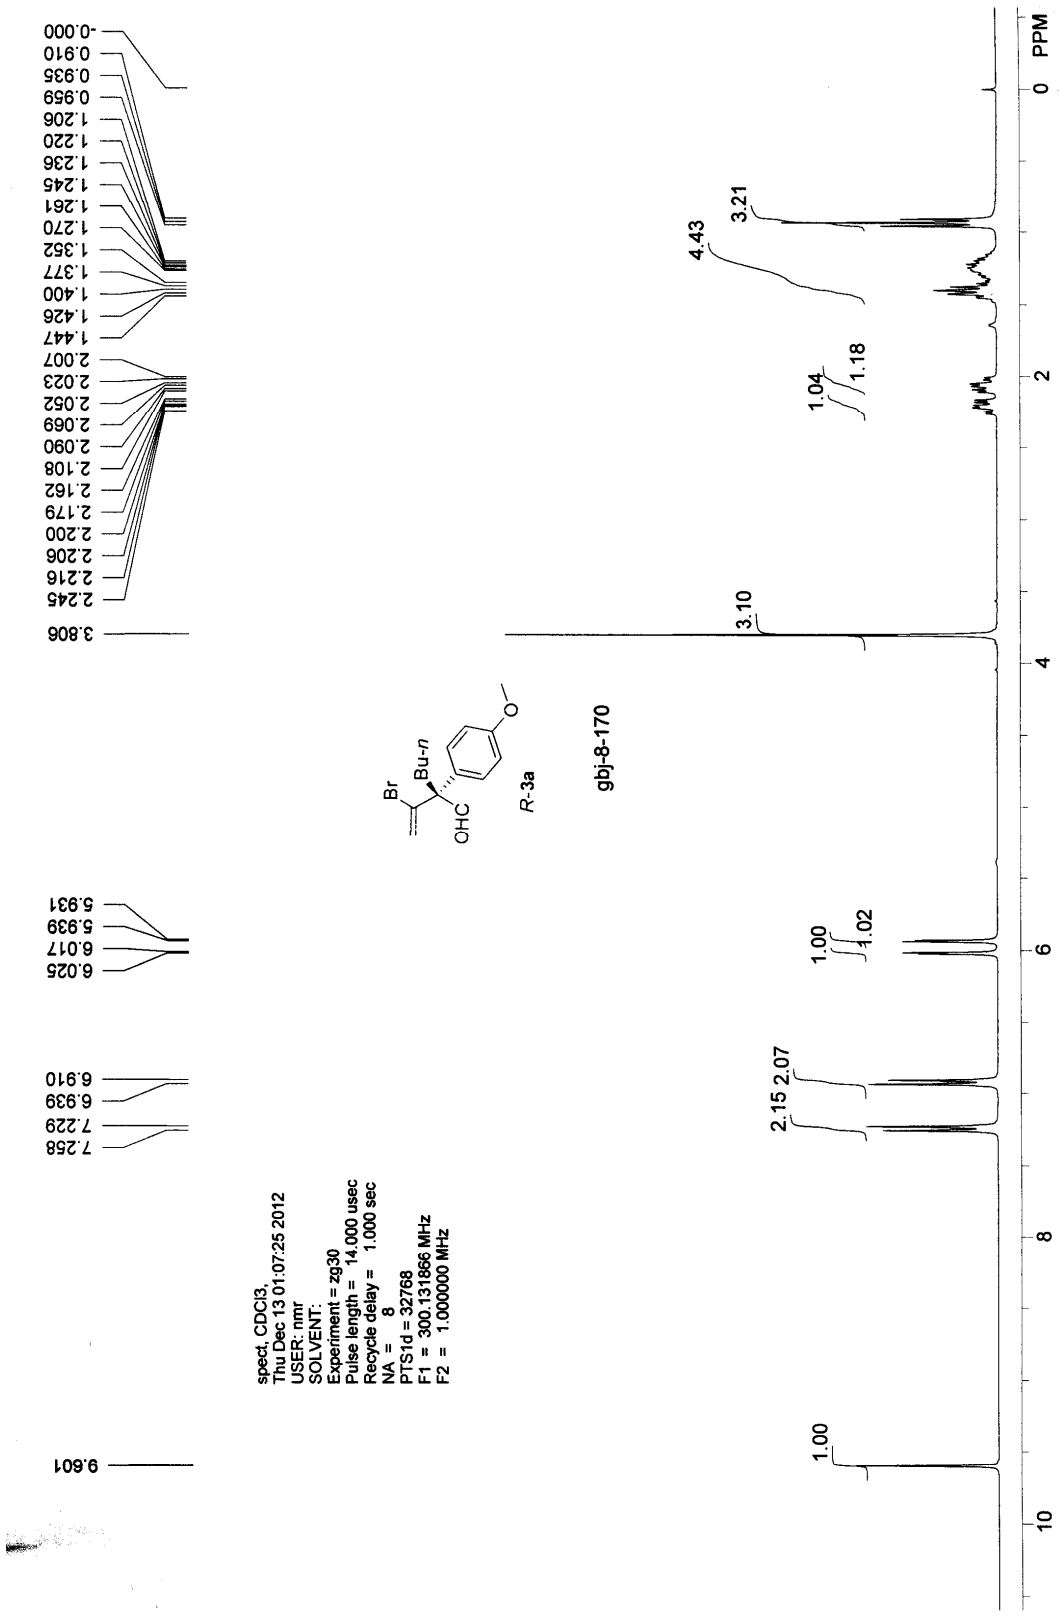

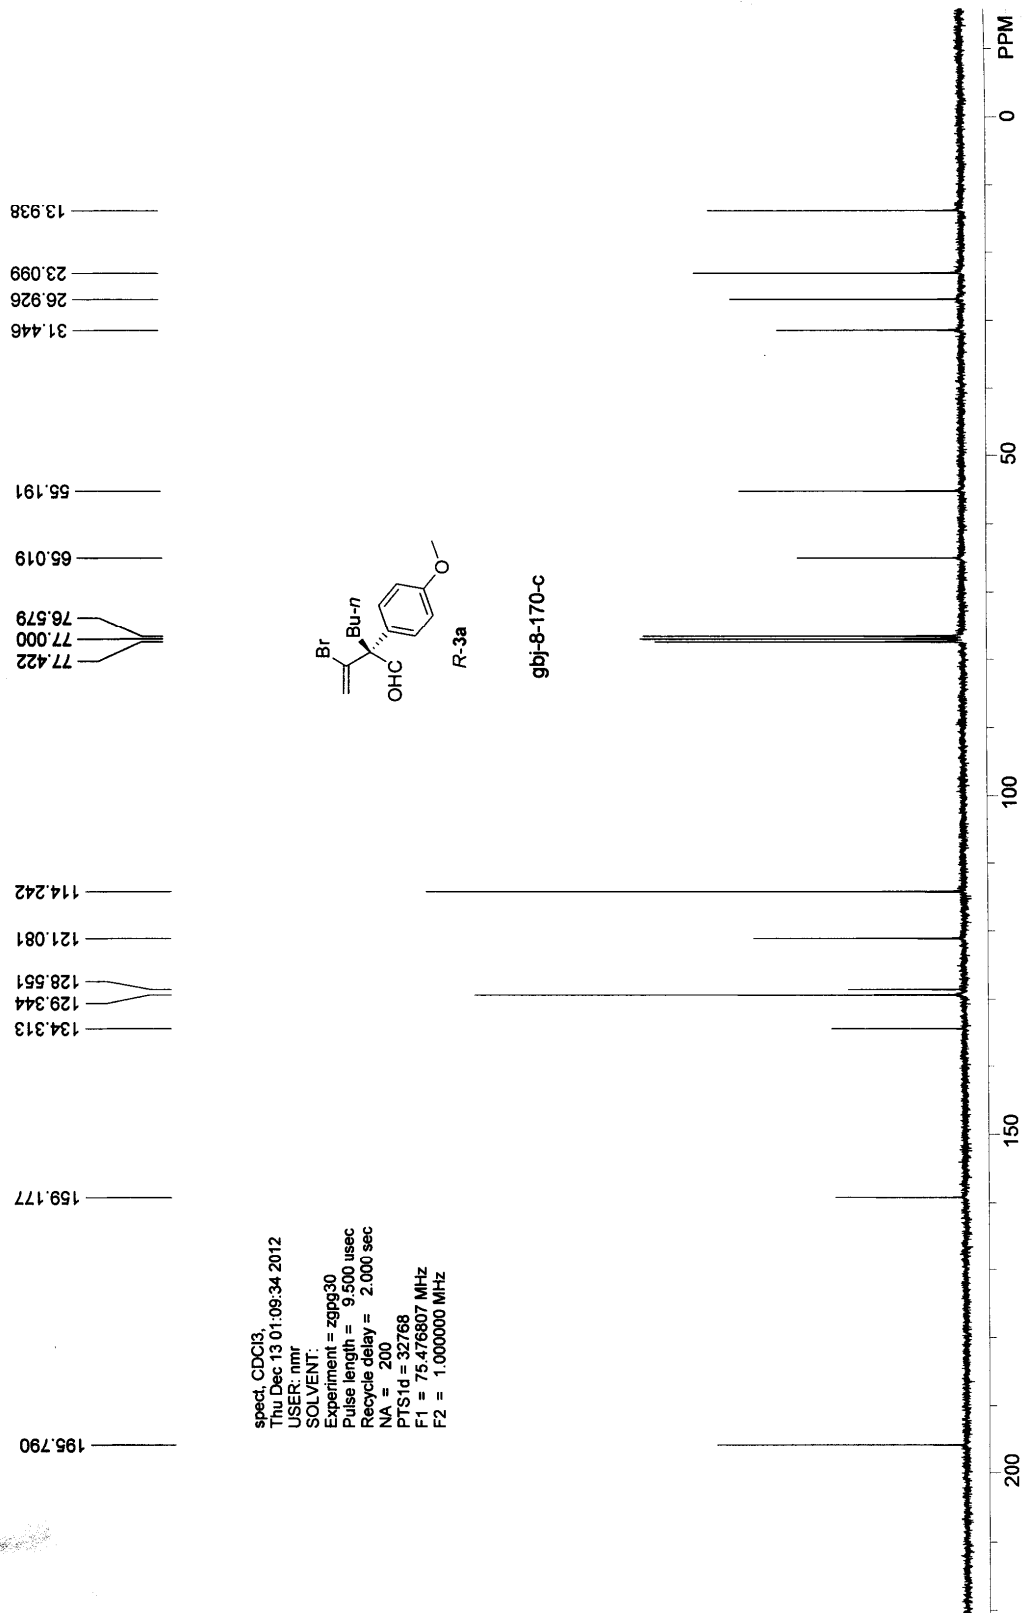

spect, CDCl3,  
 Thu Dec 13 01:09:34 2012  
 USER: nmr  
 SOLVENT:  
 Experiment = zqpp30  
 Pulse length = 9.500 usec  
 Recycle delay = 2.000 sec  
 NA = 200  
 P1 = 32768  
 F1 = 75.476807 MHz  
 F2 = 1.0000000 MHz

OJ-H, n-Hexane:i-PrOH =80/20, 1.20 mL/min, 230 nm

```

=====
Injection Date : 12/14/2012 1:14:31 AM
Sample Name    : gbj-8-170                Location :   -
Acq. Operator  : gbj
Acq. Method    : D:\HPCHEM\1\METHODS\XFX_LC.M
Last changed   : 12/14/2012 1:13:20 AM by gbj
                (modified after loading)
Analysis Method : D:\HPCHEM\1\METHODS\XFX_LC.M
Last changed   : 12/14/2012 1:38:16 AM by gbj
                (modified after loading)
=====

```

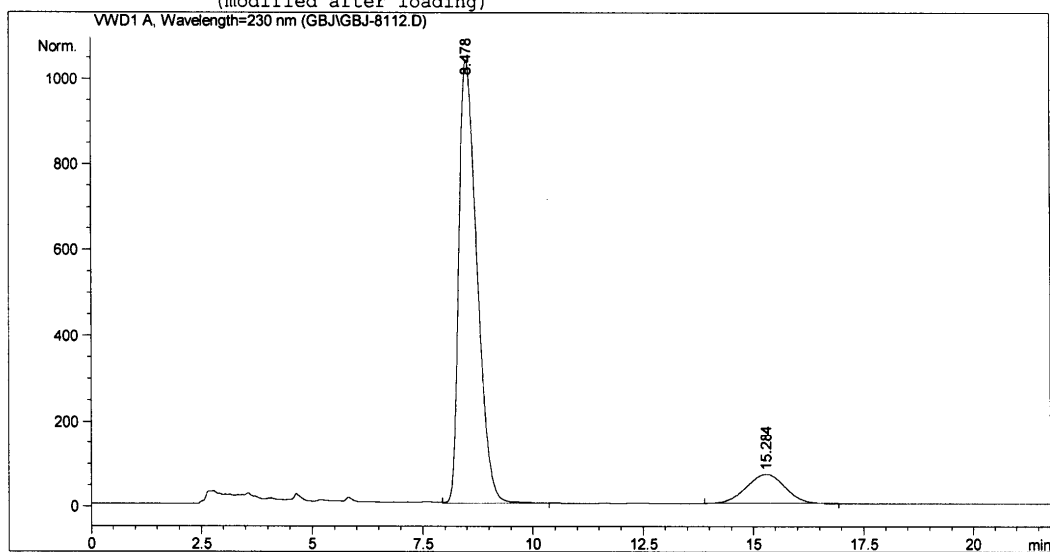

```

=====
Area Percent Report
=====

```

```

Sorted By      :      Signal
Multiplier     :      1.0000
Dilution       :      1.0000
Use Multiplier & Dilution Factor with ISTDs

```

Signal 1: VWD1 A, Wavelength=230 nm

| Peak # | RetTime [min] | Type | Width [min] | Area mAU *s | Height [mAU] | Area %  |
|--------|---------------|------|-------------|-------------|--------------|---------|
| 1      | 8.478         | VB   | 0.4440      | 2.95991e4   | 1036.00488   | 87.4298 |
| 2      | 15.284        | BB   | 0.9656      | 4255.60498  | 68.85917     | 12.5702 |

```
Totals :                3.38547e4  1104.86405
```

Results obtained with enhanced integrator!

```

=====
*** End of Report ***
=====

```

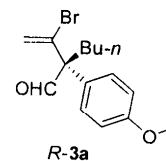

OJ-H, n-Hexane:i-PrOH =80/20, 1.20 mL/min, 230 nm

```

=====
Injection Date   : 12/14/2012 12:17:21 AM
Sample Name     : gbj-8-165                Location  :   -
Acq. Operator   : gbj
Method          : D:\HPCHEM\1\METHODS\XFX LC.M
Last changed    : 12/14/2012 12:14:19 AM by gbj
                  (modified after loading)
=====
    
```

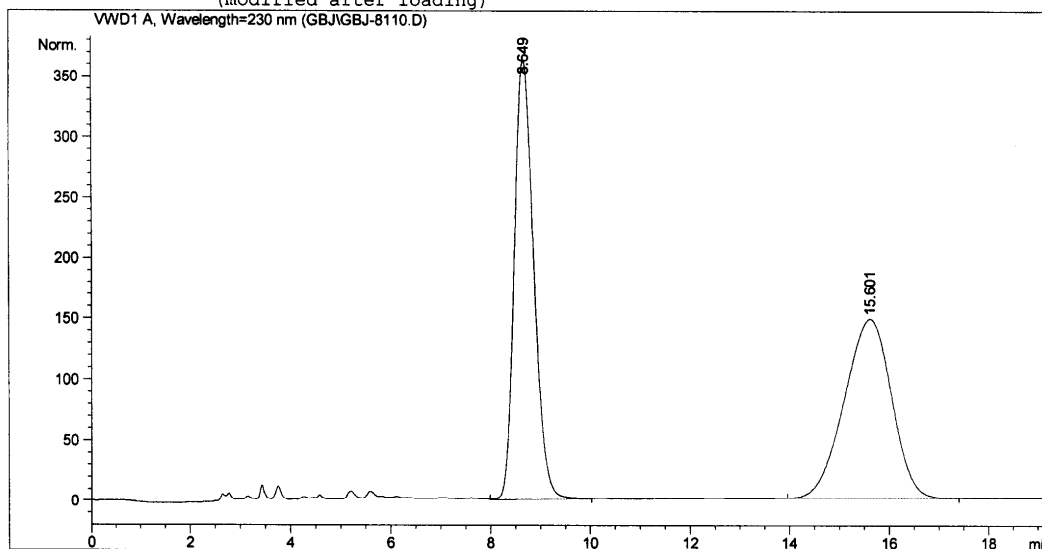

=====  
 Area Percent Report  
 =====

```

Sorted By       : Signal
Multiplier     : 1.0000
Dilution       : 1.0000
Use Multiplier & Dilution Factor with ISTDs
    
```

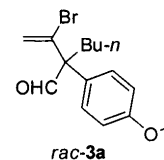

Signal 1: VWD1 A, Wavelength=230 nm

| Peak # | RetTime [min] | Type | Width [min] | Area mAU   | Area *s   | Height [mAU] | Area % |
|--------|---------------|------|-------------|------------|-----------|--------------|--------|
| 1      | 8.649         | VB   | 0.4209      | 9830.75879 | 362.88113 | 50.1633      |        |
| 2      | 15.601        | BB   | 1.0416      | 9766.77148 | 147.28003 | 49.8367      |        |

Totals : 1.95975e4 510.16116

Results obtained with enhanced integrator!

=====  
 \*\*\* End of Report \*\*\*

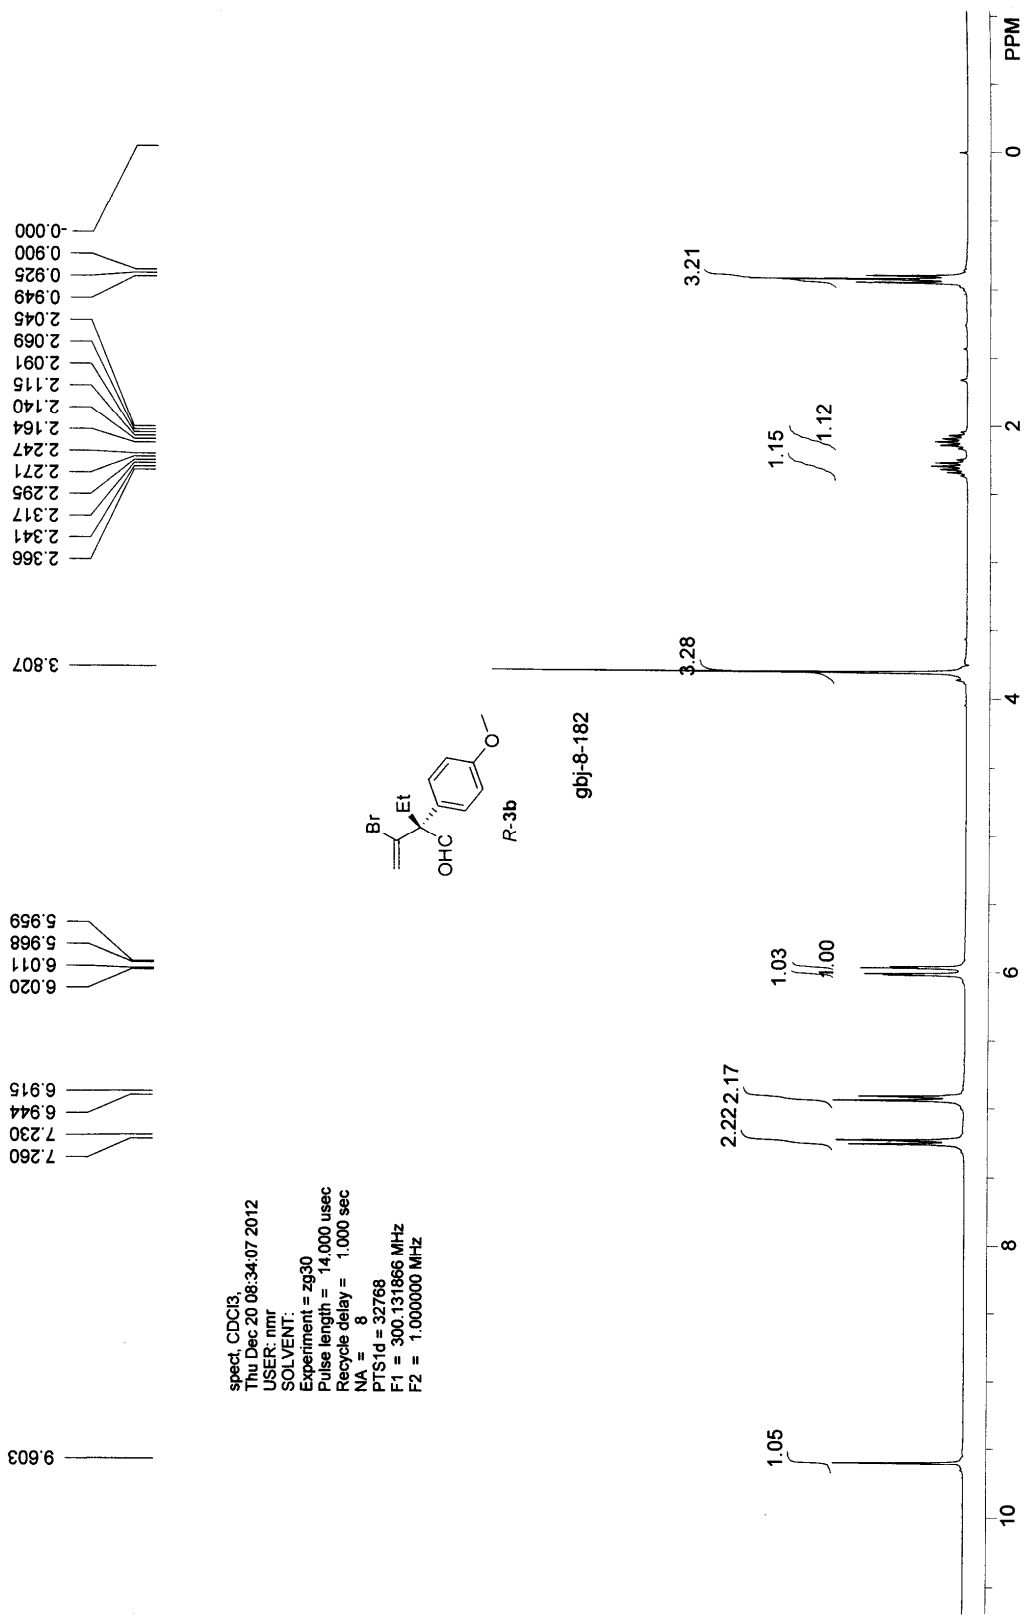

spect, CDCl3,  
 Thu Dec 20 08:34:07 2012  
 USER: nmr  
 SOLVENT:  
 Experiment = 2030  
 Pulse length = 14,000 usec  
 Recycle delay = 1,000 sec  
 NA = 8  
 PTS1d = 32768  
 F1 = 300.131866 MHz  
 F2 = 1,0000000 MHz

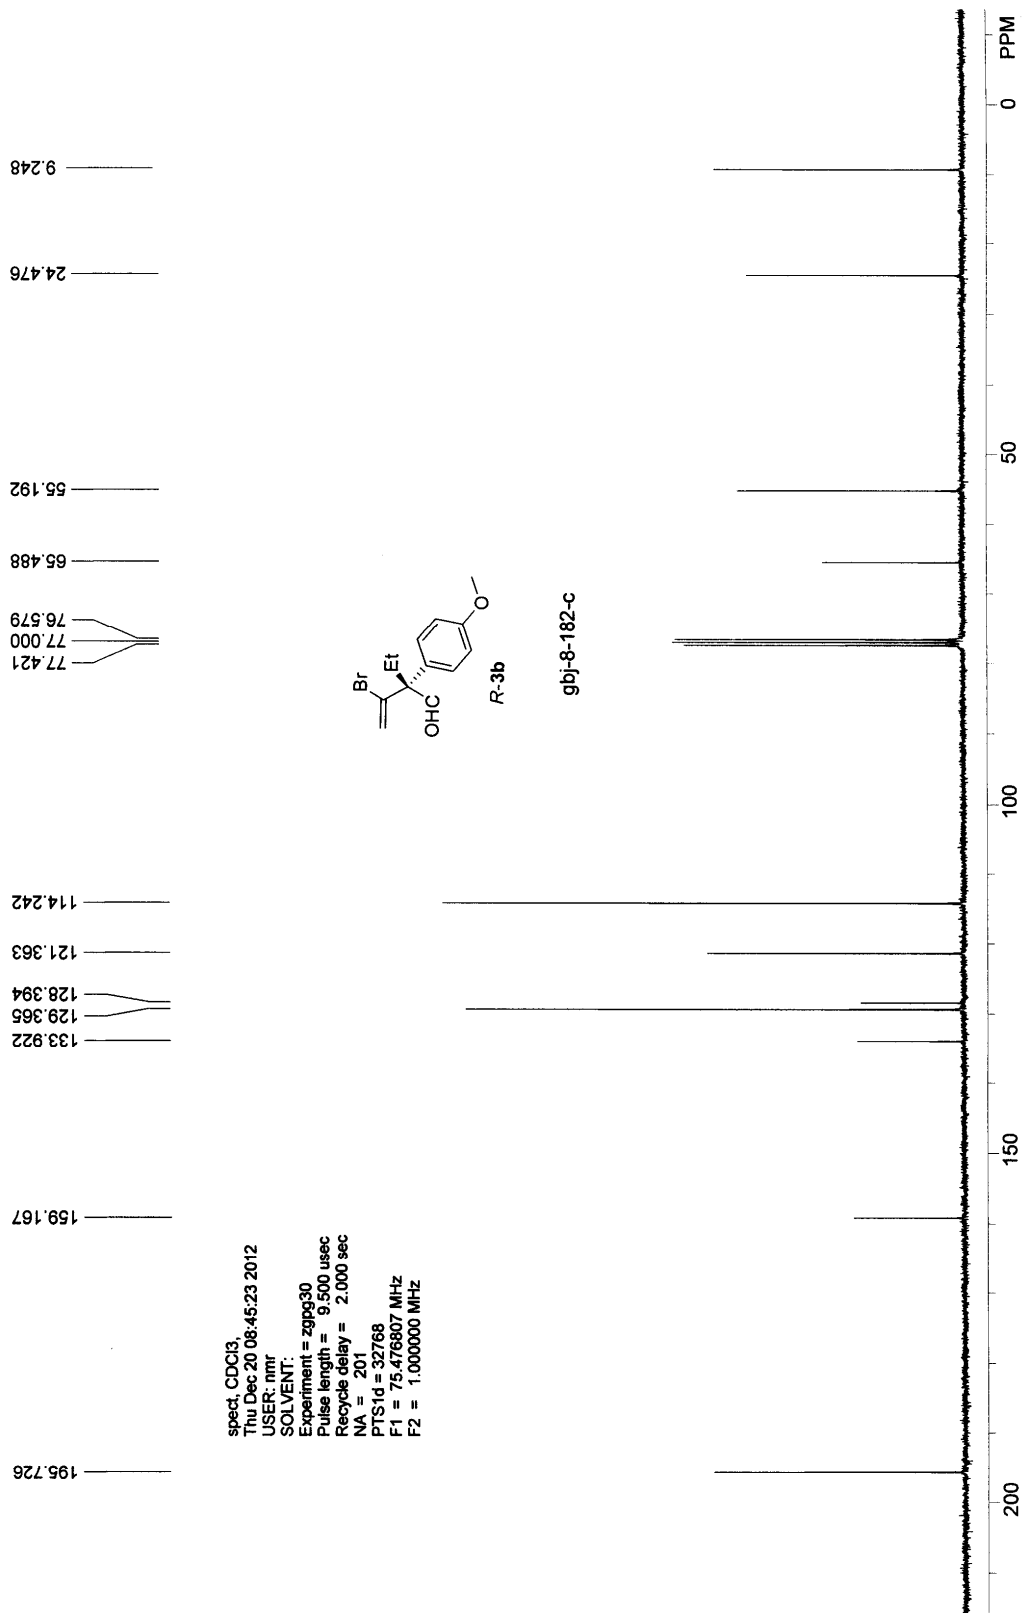

数据文件 D:\Chem32\1\DATA\GBJ\GBJ-8000153.D  
 样品名: gbj-8-182

OJ-H, n-hexane/i-PrOH =80/20, 1.2 ml/min; 230 nm

```

=====
进样日期       : 2004-1-1 0:49:47
样品名称       : gbj-8-182           位置   : -
操作者        : gbj
仪器           : 仪器 1
方法           : D:\CHEM32\1\METHODS\JJS.M
最后修改      : 2004-1-1 0:03:08   : gbj-8-182
                (调用后修改)
=====
  
```

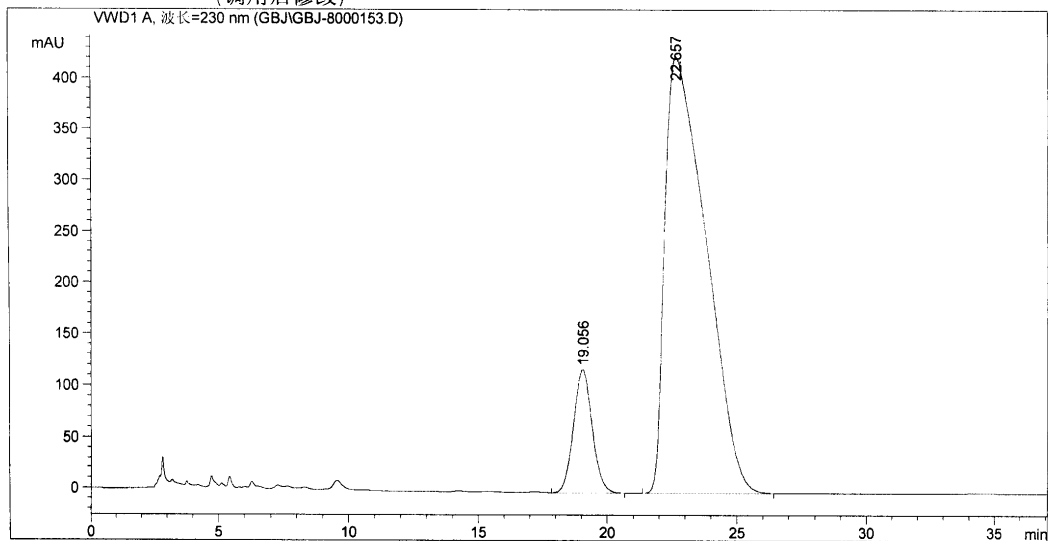

=====  
 面积百分比报告  
 =====

```

排序           :          信号
乘积因子       :          1.0000
稀释因子       :          1.0000
内标使用乘积因子和稀释因子
  
```

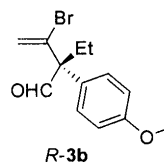

信号 1: VWD1 A, 波长=230 nm

| 峰 # | 保留时间 [min] | 类型 | 峰宽 [min] | 峰面积 mAU * s | 峰高 [mAU]  | 峰面积 %   |
|-----|------------|----|----------|-------------|-----------|---------|
| 1   | 19.056     | VV | 0.7636   | 6094.59521  | 120.15231 | 11.5248 |
| 2   | 22.657     | BV | 1.5022   | 4.67878e4   | 425.68427 | 88.4752 |

总量 : 5.28824e4 545.83657

=====  
 \*\*\* 报告结束 \*\*\*



数据文件 D:\Chem32\1\DATA\GBJ\GBJ-8000152.D  
样品名: gbj-8-181

OJ-H, n-hexane/i-PrOH =80/20, 1.2 ml/min; 230 nm

=====  
进样日期 : 2004-1-1 0:19:43  
样品名称 : gbj-8-181 位置 : -  
操作者 : gbj  
仪器 : 仪器 1  
方法 : D:\CHEM32\1\METHODS\JJS.M  
最后修改 : 2004-1-1 0:03:08 : gbj-8-182  
(调用后修改)  
=====

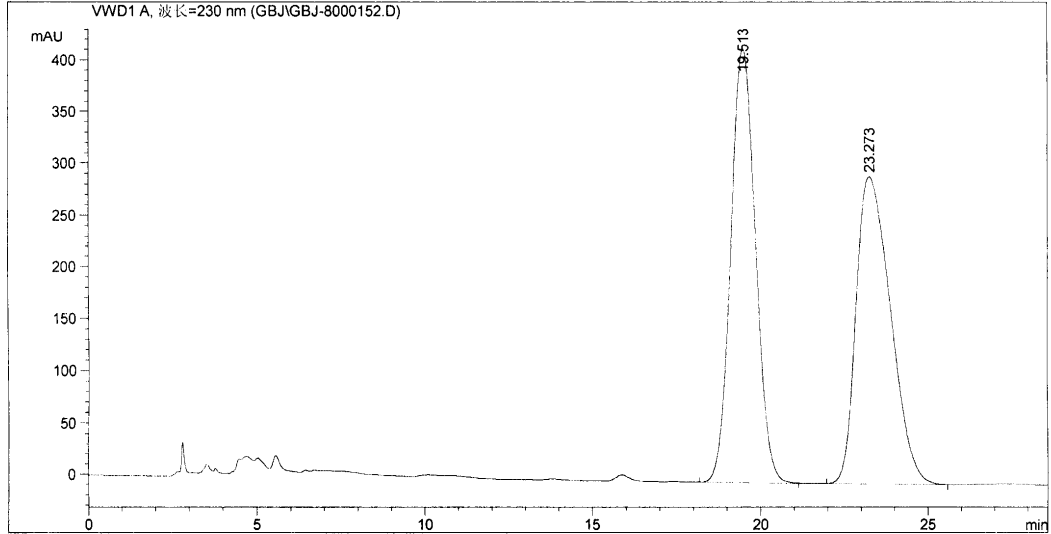

=====  
面积百分比报告  
=====

排序 : 信号  
乘积因子 : 1.0000  
稀释因子 : 1.0000  
内标使用乘积因子和稀释因子

信号 1: VWD1 A, 波长=230 nm

| 峰 # | 保留时间 [min] | 类型 | 峰宽 [min] | 峰面积 mAU *s | 峰高 [mAU]  | 峰面积 %   |
|-----|------------|----|----------|------------|-----------|---------|
| 1   | 19.513     | BV | 0.7972   | 2.13492e4  | 418.72253 | 50.0655 |
| 2   | 23.273     | BB | 1.1222   | 2.12933e4  | 296.34747 | 49.9345 |

总量 : 4.26425e4 715.07001

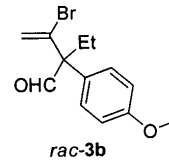

=====  
\*\*\* 报告结束 \*\*\*  
=====

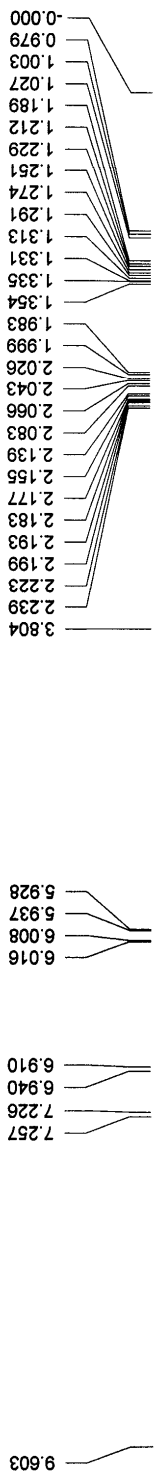

spect, CDCl3,  
 Thu Dec 20 08:00:08 2012  
 USER: nmr  
 SOLVENT:  
 Experiment = zq30  
 Pulse length = 14,000 usec  
 Recycle delay = 1.000 sec  
 NA = 8  
 PTS1d = 32768  
 F1 = 300.131866 MHz  
 F2 = 1,000000 MHz

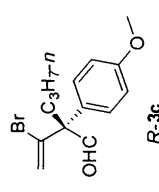

gbj-8-180

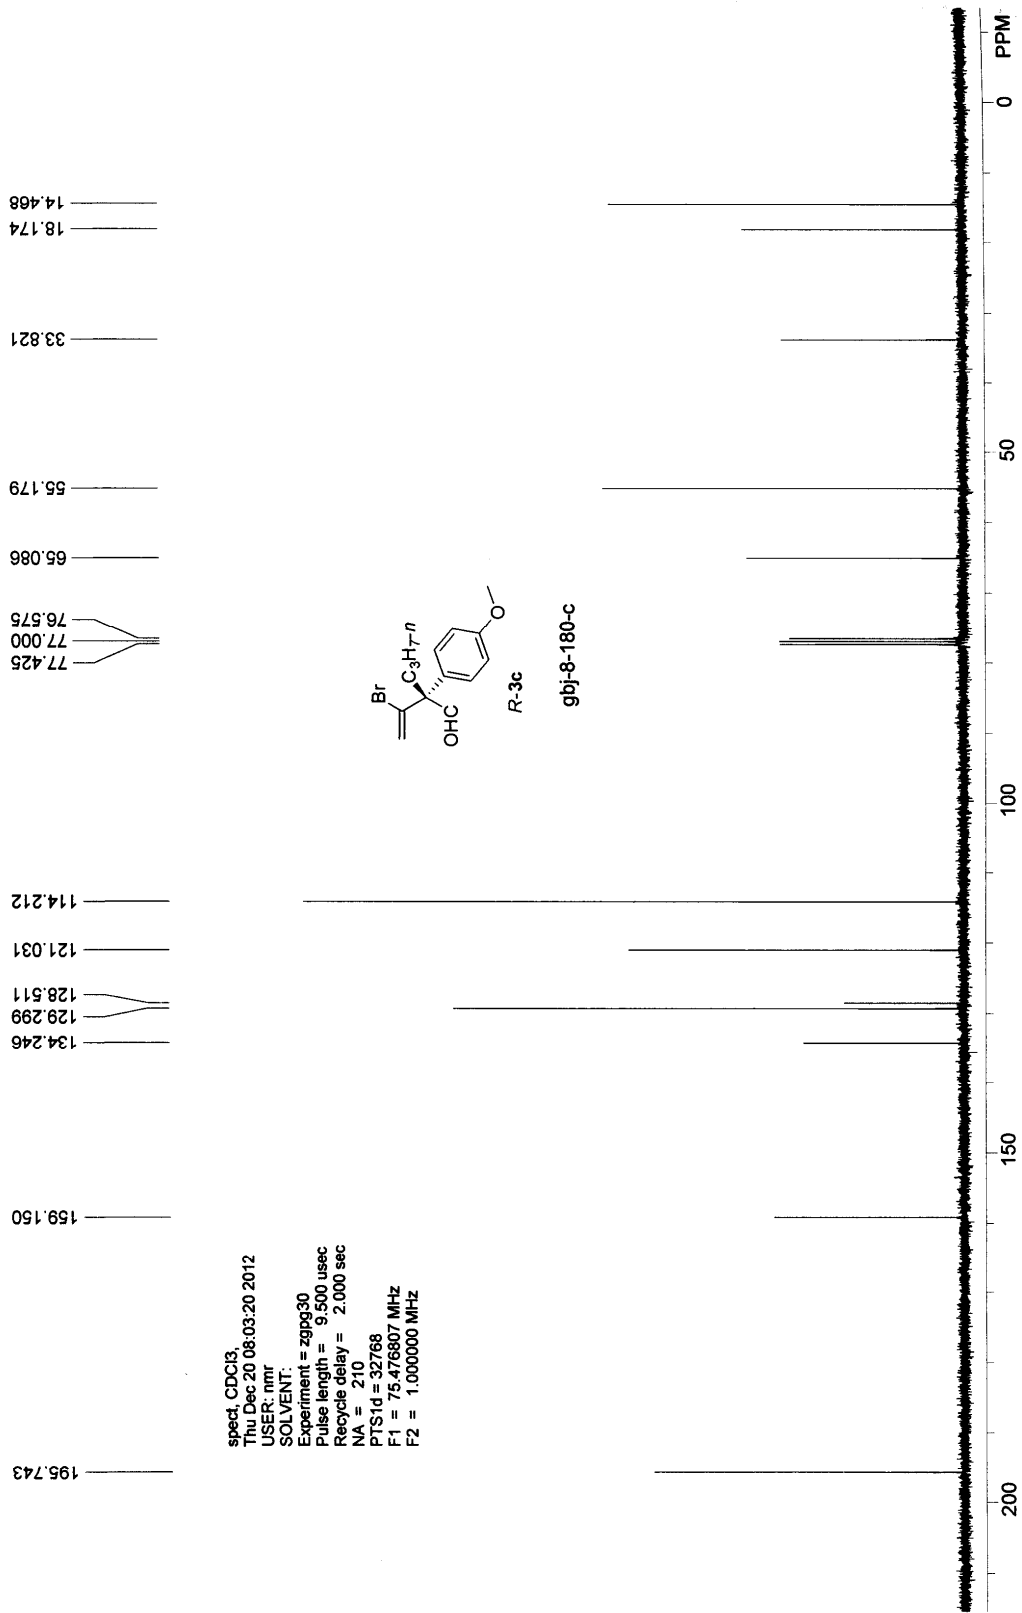

spec1, CDCl3,  
 Thu Dec 20 08:03:20 2012  
 USER: nmr  
 SOLVENT:  
 Experiment = zppg30  
 Pulse length = 9.500 usec  
 Recycle delay = 2.000 sec  
 NA = 210  
 PTS1d = 32768  
 F1 = 75.476807 MHz  
 F2 = 1.000000 MHz

OJ-H, n-Hexane:i-PrOH = 80/20, 1.2 mL/min, 230 nm

```

=====
Injection Date : 12/19/2012 12:34:46 AM
Sample Name    : gbj-8-180
Acq. Operator  : gbj
Method         : D:\HPCHEM\1\METHODS\XFX_LC.M
Last changed   : 12/19/2012 12:03:18 AM by WG
                  (modified after loading)
Location      : -
    
```

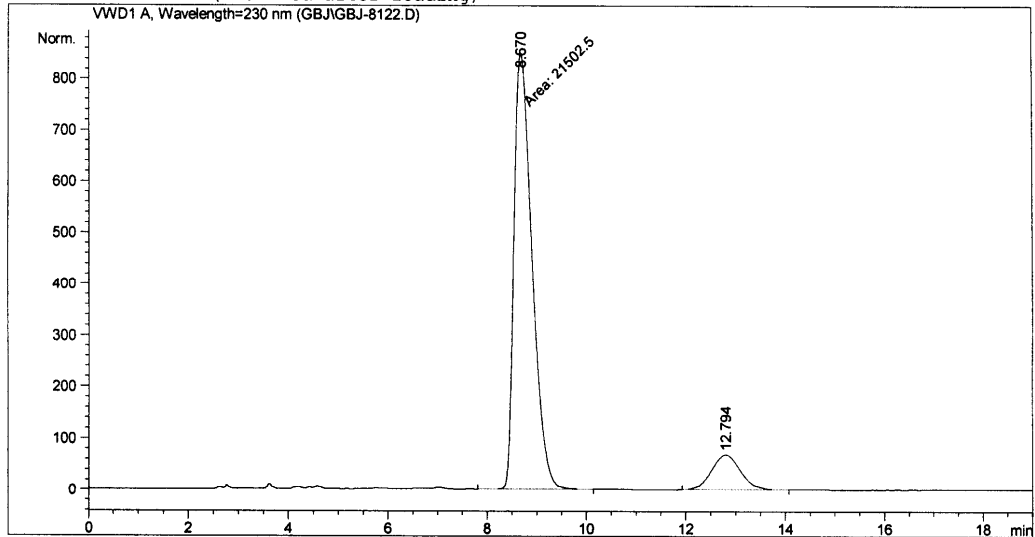

Area Percent Report

```

=====
Sorted By      : Signal
Multiplier     : 1.0000
Dilution       : 1.0000
Use Multiplier & Dilution Factor with ISTDs
    
```

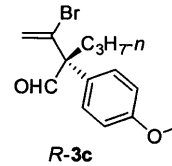

Signal 1: VWD1 A, Wavelength=230 nm

| Peak # | RetTime [min] | Type | Width [min] | Area mAU   | Area *s   | Height [mAU] | Area % |
|--------|---------------|------|-------------|------------|-----------|--------------|--------|
| 1      | 8.670         | MM   | 0.4215      | 2.15025e4  | 850.23608 | 88.3018      |        |
| 2      | 12.794        | BB   | 0.6468      | 2848.64990 | 68.71005  | 11.6982      |        |

Totals : 2.43512e4 918.94614

Results obtained with enhanced integrator!

\*\*\* End of Report \*\*\*

OJ-H, n-Hexane:i-PrOH = 80/20, 1.2 mL/min, 230 nm

```

=====
Injection Date : 12/19/2012 12:17:40 AM
Sample Name    : gbj-8-179
Acq. Operator  : gbj
Method         : D:\HPCHEM\1\METHODS\XFX_LC.M
Last changed   : 12/19/2012 12:03:18 AM by WG
                  (modified after loading)
Location      : -
    
```

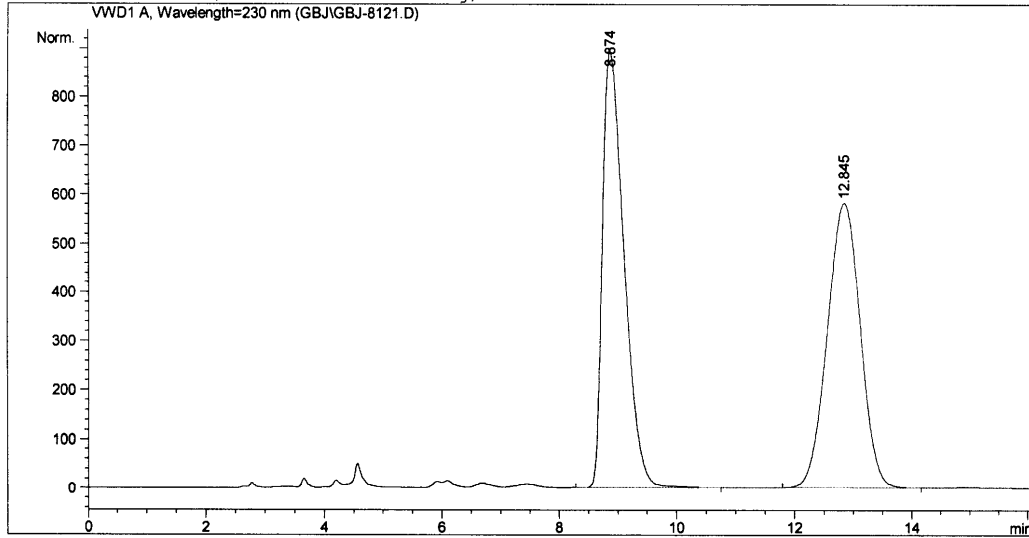

Area Percent Report

```

=====
Sorted By      : Signal
Multiplier     : 1.0000
Dilution       : 1.0000
Use Multiplier & Dilution Factor with ISTDs
    
```

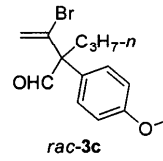

Signal 1: VWD1 A, Wavelength=230 nm

| Peak # | RetTime [min] | Type | Width [min] | Area mAU  | Area *s   | Height [mAU] | Area % |
|--------|---------------|------|-------------|-----------|-----------|--------------|--------|
| 1      | 8.874         | BP   | 0.3980      | 2.28660e4 | 892.22607 | 50.0165      |        |
| 2      | 12.845        | BB   | 0.6121      | 2.28509e4 | 582.39941 | 49.9835      |        |

Totals : 4.57169e4 1474.62549

Results obtained with enhanced integrator!

\*\*\* End of Report \*\*\*

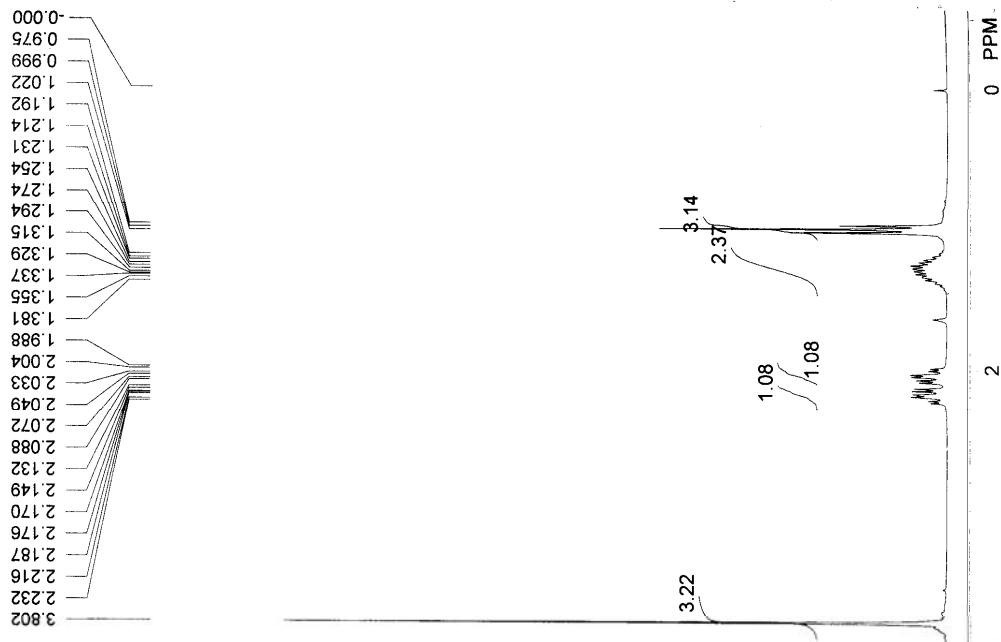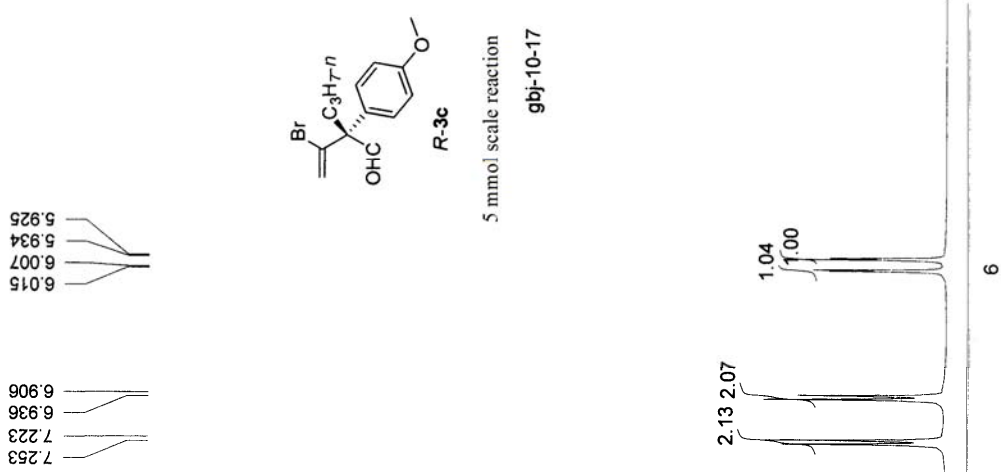

spect, CDCl3,  
 Mon May 27 06:15:15 2013  
 USER: nmr  
 SOLVENT:  
 Experiment = zg30  
 Pulse length = 14,000 usec  
 Recycle delay = 1,000 sec  
 NA = 8  
 P1 = 32768  
 F1 = 300.131866 MHz  
 F2 = 1,000,000 MHz

9.605  
 7.253  
 7.223  
 6.936  
 6.906  
 6.015  
 6.007  
 5.934  
 5.925  
 3.802  
 3.82  
 3.22  
 2.37  
 2.37  
 1.08  
 1.08  
 0.975  
 0.999  
 1.022  
 1.192  
 1.214  
 1.231  
 1.254  
 1.274  
 1.294  
 1.315  
 1.329  
 1.337  
 1.355  
 1.381  
 1.988  
 2.004  
 2.033  
 2.049  
 2.072  
 2.088  
 2.132  
 2.149  
 2.170  
 2.176  
 2.187  
 2.216  
 2.232

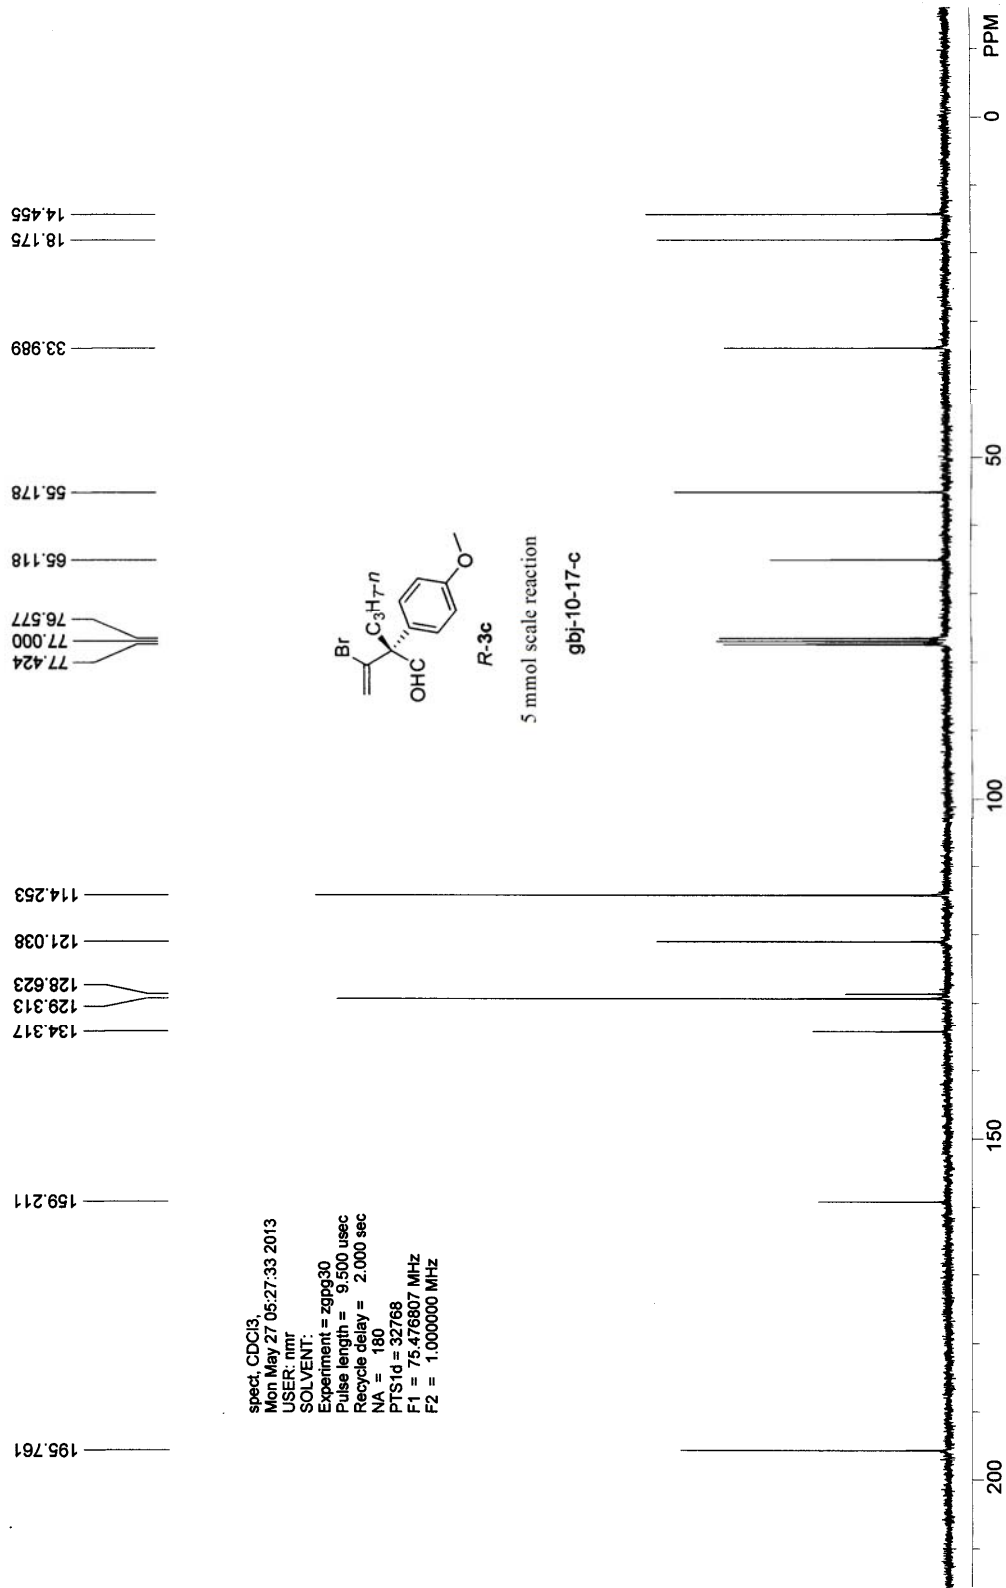

spect, CDCI3,  
Mon May 27 05:27:33 2013  
USER: nmr  
SOLVENT:  
Experiment = zgpg30  
Pulse length = 9.500 usec  
Recycle delay = 2.000 sec  
NA = 180  
PTSD = 32768  
F1 = 75.476807 MHz  
F2 = 1.000000 MHz

居文件 D:\Chem32\1\DATA\GBJ\GBJ-10000001.D  
 品名: gbj-10-17

OJ-H; n-Hexane/i-PrOH =80/20; 1.2 ml/min; 230nm

=====  
 进样日期 : 2013-5-27 10:53:17  
 样品名称 : gbj-10-17 位置 : -  
 操作者 : gbj  
 仪器 : 仪器 1  
 方法 : D:\CHEM32\1\METHODS\ZYY\_LC.M  
 最后修改 : 2013-5-27 10:38:38 : cd  
 (调用后修改)

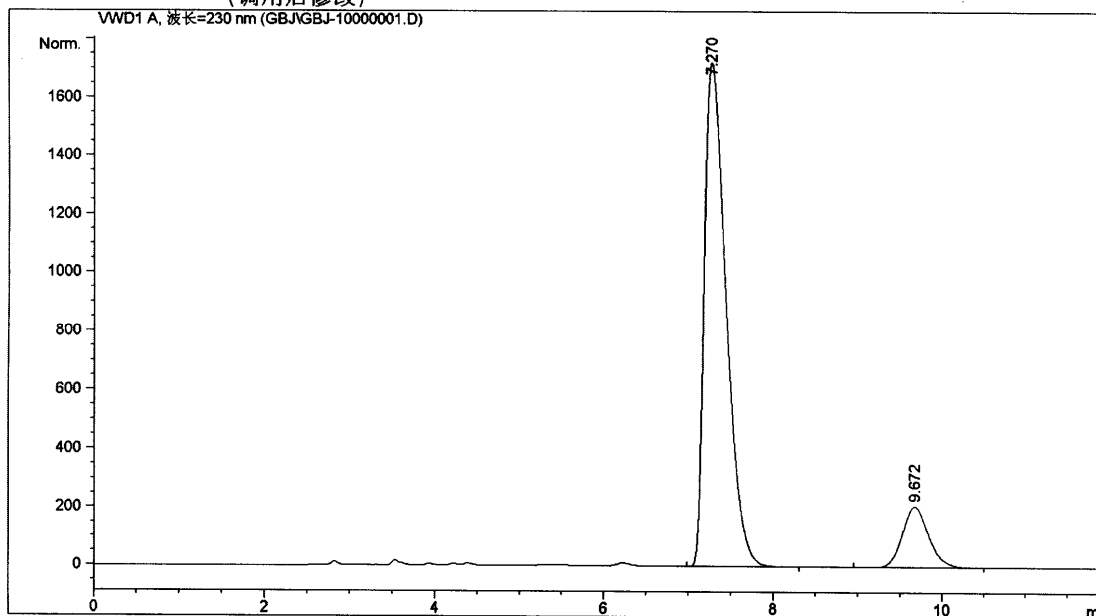

=====  
 面积百分比报告  
 =====

排序 : 信号  
 乘积因子 : 1.0000  
 稀释因子 : 1.0000  
 内标使用乘积因子和稀释因子

信号 1: VWD1 A, 波长=230 nm

| 峰 # | 保留时间 [min] | 类型 | 峰宽 [min] | 峰面积 mAU *s | 峰高 [mAU]   | 峰面积 %   |
|-----|------------|----|----------|------------|------------|---------|
| 1   | 7.270      | VB | 0.2735   | 3.04862e4  | 1722.31641 | 86.9986 |
| 2   | 9.672      | BB | 0.3318   | 4555.99414 | 209.91898  | 13.0014 |

总量 : 3.50422e4 1932.23538

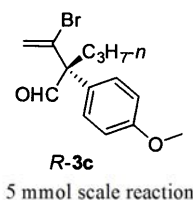

=====  
 \*\*\* 报告结束 \*\*\*



数据文件 D:\Chem32\1\DATA\GBJ\GBJ-10000002.D  
 样品名: gbj-10-17-rac

OJ-H; n-Hexane/i-PrOH =80/20; 1.2 ml/min; 230nm

=====  
 进样日期 : 2013-5-27 11:07:53  
 样品名称 : gbj-10-17-rac 位置 : -  
 操作者 : gbj  
 仪器 : 仪器 1  
 方法 : D:\CHEM32\1\METHODS\ZYY\_LC.M  
 最后修改 : 2013-5-27 10:38:38 : cd  
 (调用后修改)

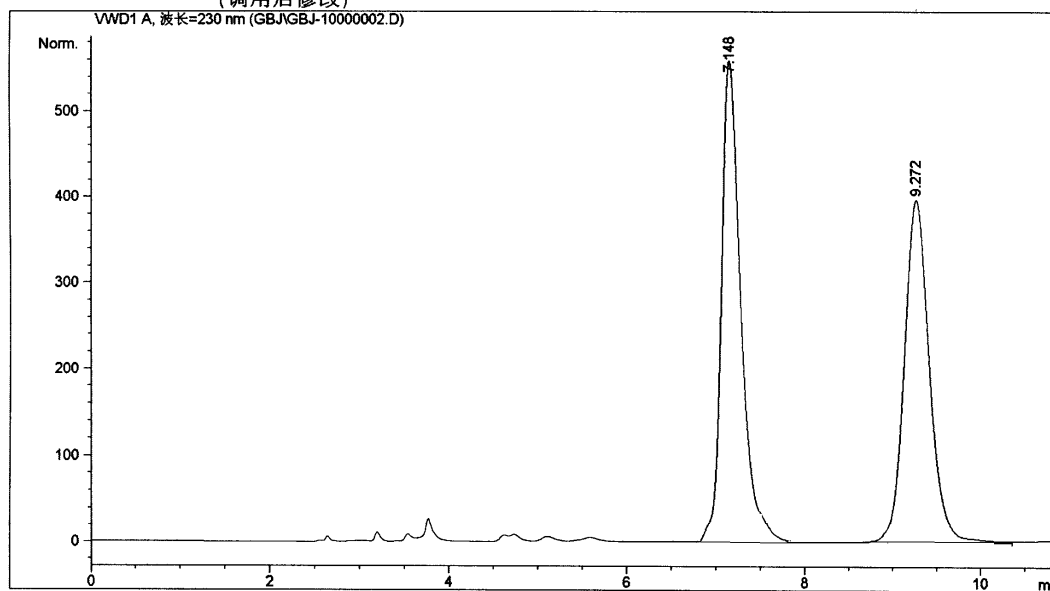

=====  
 面积百分比报告  
 =====

排序 : 信号  
 乘积因子 : 1.0000  
 稀释因子 : 1.0000  
 内标使用乘积因子和稀释因子

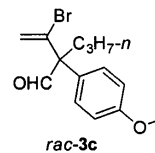

信号 1: VWD1 A, 波长=230 nm

| 峰 # | 保留时间 [min] | 类型 | 峰宽 [min] | 峰面积 mAU *s | 峰高 [mAU]  | 峰面积 %   |
|-----|------------|----|----------|------------|-----------|---------|
| 1   | 7.148      | VV | 0.2222   | 8204.66016 | 559.11871 | 50.3720 |
| 2   | 9.272      | VV | 0.3088   | 8083.48535 | 397.21329 | 49.6280 |

总量 : 1.62881e4 956.33200

=====  
 \*\*\* 报告结束 \*\*\*

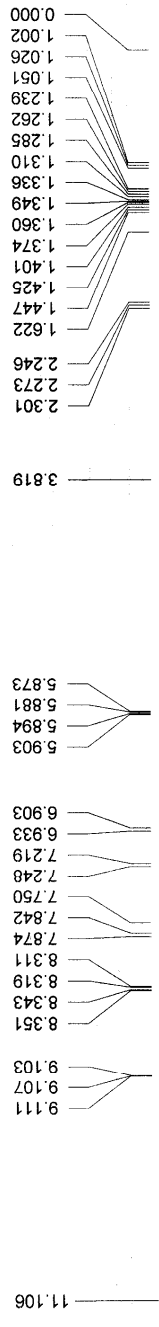

spect, CDC13,  
 Thu Jan 23 07:28:20 2014  
 USER: nmr  
 SOLVENT:  
 Experiment = zg30  
 Pulse length = 14,000 usec  
 Recycle delay = 1,000 sec  
 NA = 8  
 P1 = 32768  
 F1 = 300.131866 MHz  
 F2 = 1,000,000 MHz

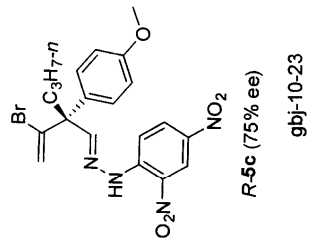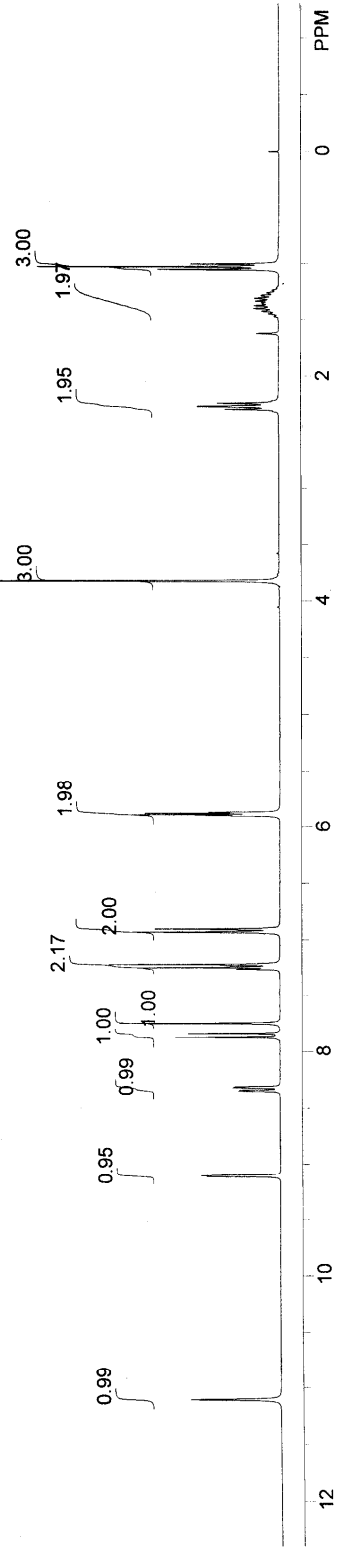

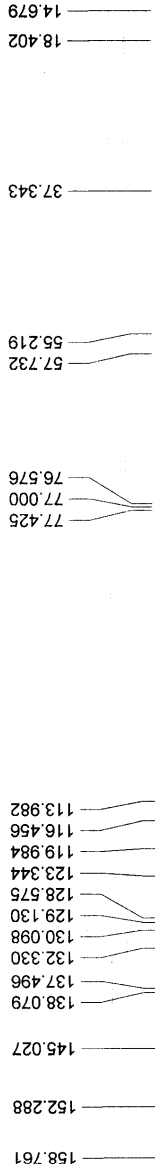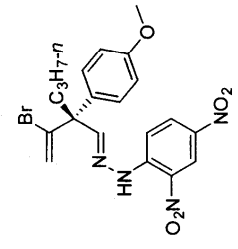

spect\_CDCl3  
 Thu Jan 23 07:30:34 2014  
 USER: mmr  
 SOLVENT:   
 Experiment = zgpg30  
 Pulse length = 9.500 usec  
 Recycle delay = 2.000 sec  
 NA = 1000  
 PTS1d = 32768  
 F1 = 75.476807 MHz  
 F2 = 1.0000000 MHz

R-5c (75% ee)  
 gbj-10-23-c

据文件 D:\Chem32\1\DATA\GBJ\GBJ-10000047.D  
 品名: gbj-10-23

OD-H, n-Hexane/i-PrOH =95/5, 1.0 ml/min; 254 nm

=====  
 进样日期 : 2013-6-11 20:03:23  
 样品名称 : gbj-10-23  
 操作者 : gbj  
 仪器 : 仪器 1  
 方法 : D:\CHEM32\1\METHODS\ZYY\_LC.M  
 最后修改 : 2013-6-11 19:05:21 : gbj  
 (调用后修改)  
 位置 : -

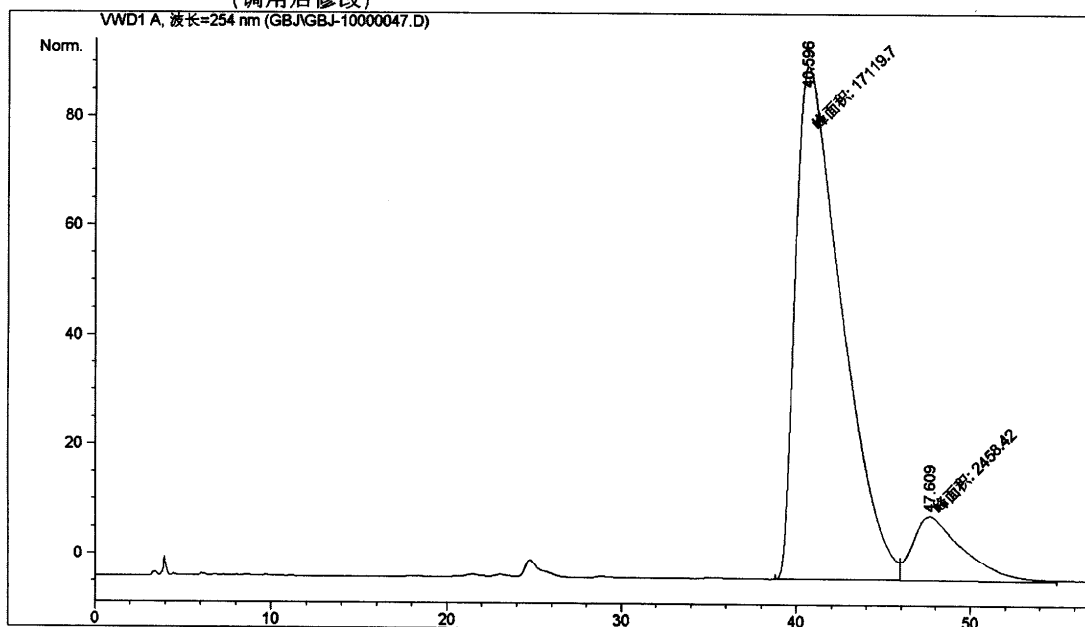

=====  
 面积百分比报告  
 =====

排序 : 信号  
 乘积因子 : 1.0000  
 稀释因子 : 1.0000  
 内标使用乘积因子和稀释因子

信号 1: VWD1 A, 波长=254 nm

| 峰 # | 保留时间 [min] | 类型 | 峰宽 [min] | 峰面积 mAU * s | 峰高 [mAU] | 峰面积 %   |
|-----|------------|----|----------|-------------|----------|---------|
| 1   | 40.596     | MF | 3.0456   | 1.71197e4   | 93.68555 | 87.4430 |
| 2   | 47.609     | MM | 3.4650   | 2458.42285  | 11.82493 | 12.5570 |

总量 : 1.95781e4 105.51049

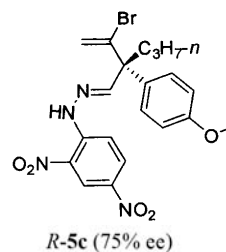

=====  
 \*\*\* 报告结束 \*\*\*  
 =====

数据文件 D:\CHEM32\1\DATA\GBJ\GBJ-10000040.D  
 样品名: gbj-10-23-rac

OD-H,n-Hexane/i-PrOH =70/30, 1.0 ml/min; 254 nm

```

=====
进样日期       : 2013-6-11 13:56:47
样品名称       : gbj-10-23-rac           位置   : -
操作者        : gbj
仪器          : 仪器 1
采集方法      : D:\CHEM32\1\METHODS\ZYY_LC.M
最后修改      : 2013-6-11 13:50:34   : gbj
              (调用后修改)
分析方法      : D:\CHEM32\1\METHODS\ZYY_LC.M
最后修改      : 2004-1-1 0:06:54   : wdx
              (调用后修改)
=====
  
```

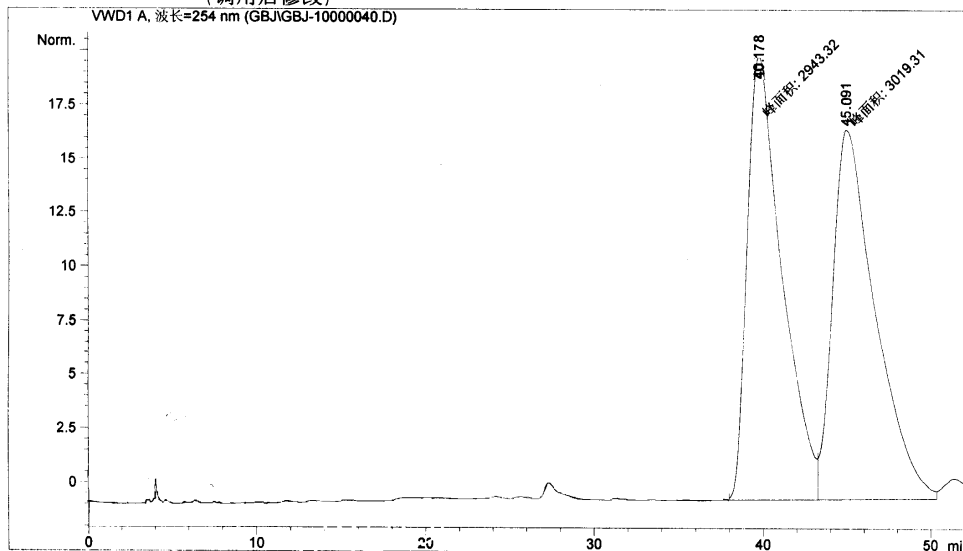

=====  
 面积百分比报告  
 =====

```

排序           :      信号
乘积因子       :      1.0000
稀释因子       :      1.0000
内标使用乘积因子和稀释因子
  
```

信号 1: VWD1 A, 波长=254 nm

| 峰 # | 保留时间 [min] | 类型 | 峰宽 [min] | 峰面积 mAU *s | 峰高 [mAU] | 峰面积 %   |
|-----|------------|----|----------|------------|----------|---------|
| 1   | 40.178     | MF | 2.3927   | 2943.32153 | 20.50200 | 49.3628 |
| 2   | 45.091     | FM | 2.9376   | 3019.30957 | 17.13020 | 50.6372 |

总量 : 5962.63110 37.63220

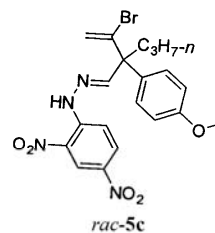

=====  
 \*\*\* 报告结束 \*\*\*

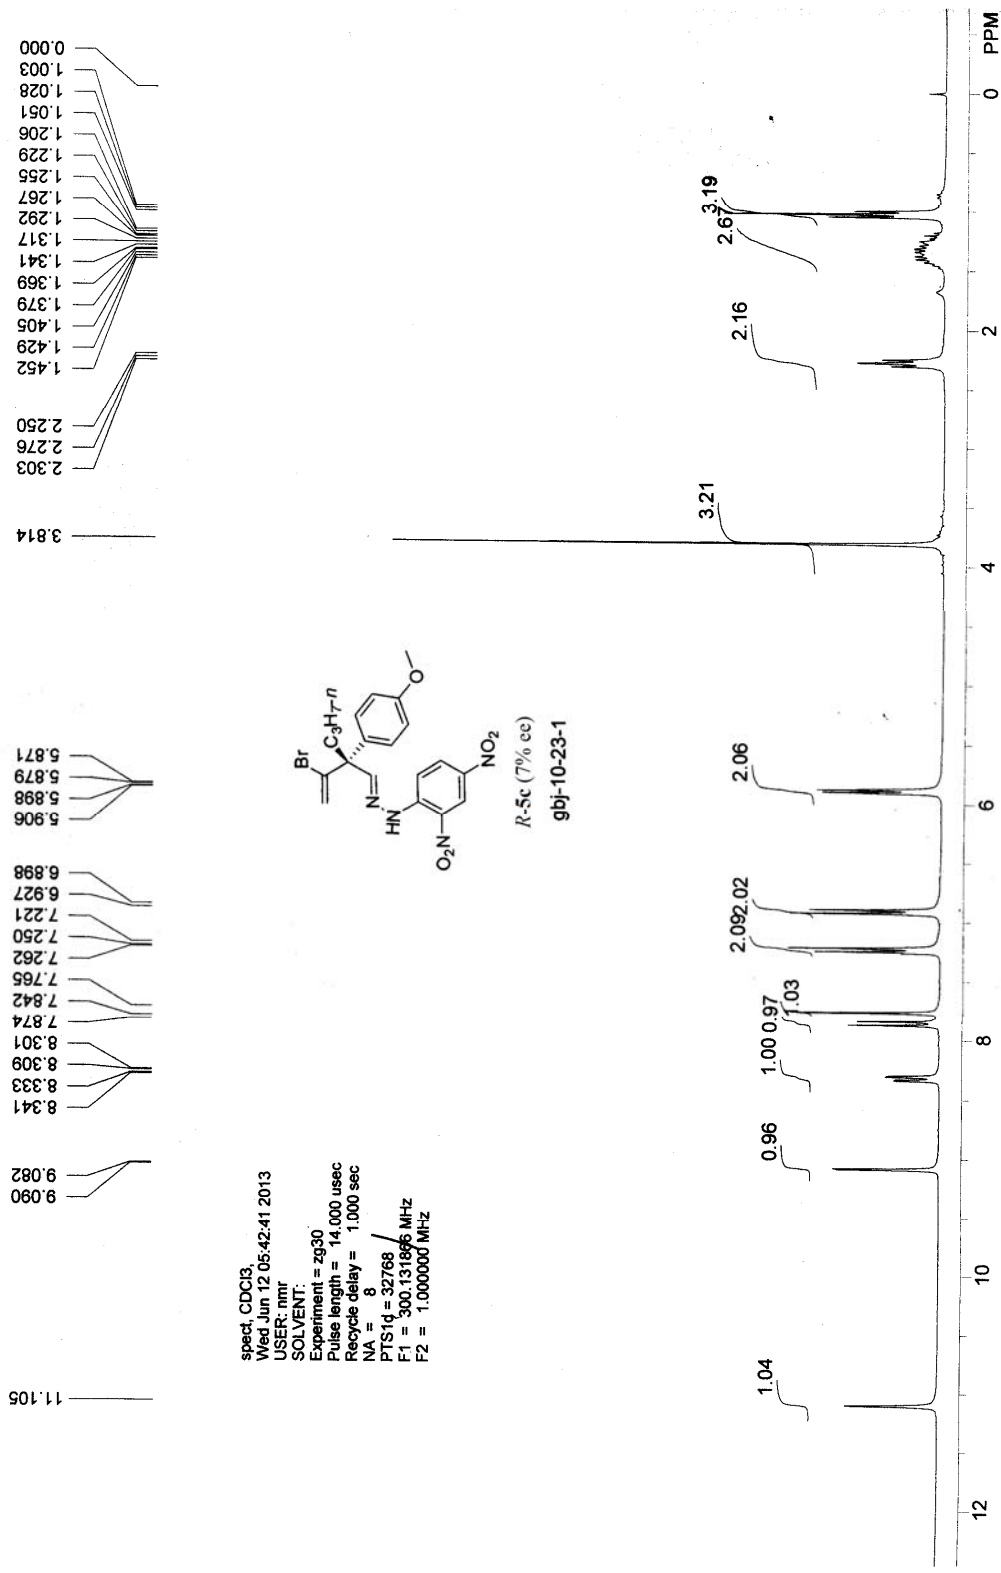

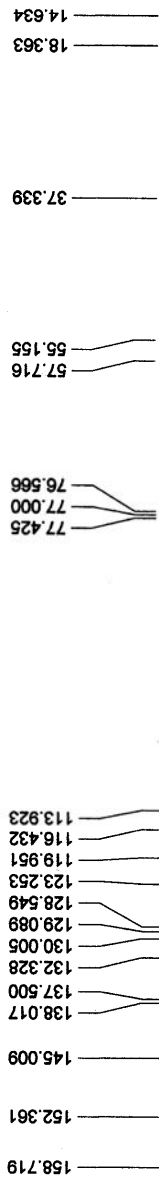

spect, CDCB3,  
Wed Jun 12 05:45:29 2013  
USER: nmr  
SOLVENT:  
Experiment = zgpg30  
Pulse length = 9.500 usec  
Recycle delay = 2.000 sec  
NA = 100  
PTS1d = 32768  
F1 = 75.476807 MHz  
F2 = 1.006000 MHz

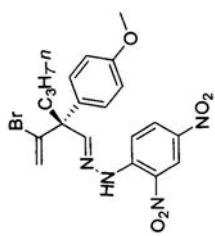

gbj-10-23-1-c

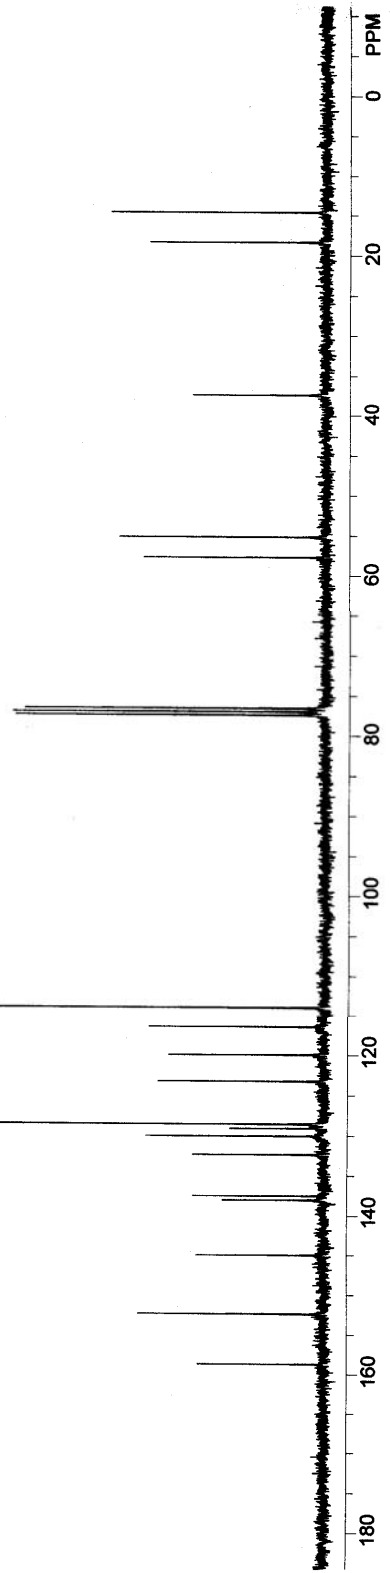

文件 D:\Chem32\1\DATA\GBJ\GBJ-1000041.D  
 名: gbj-10-23 jiejin

OD-H, n-Hexane/i-PrOH =95/5, 1.0 ml/min; 254 nm

进样日期 : 2013-6-10 15:46:06  
 样品名称 : gbj-10-23 jiejin  
 操作者 : gbj  
 仪器 : 仪器 1  
 方法 : D:\CHEM32\1\METHODS\ZYY\_LC.M  
 最后修改 : 2013-6-10 14:50:34 : gbj  
 (调用后修改)

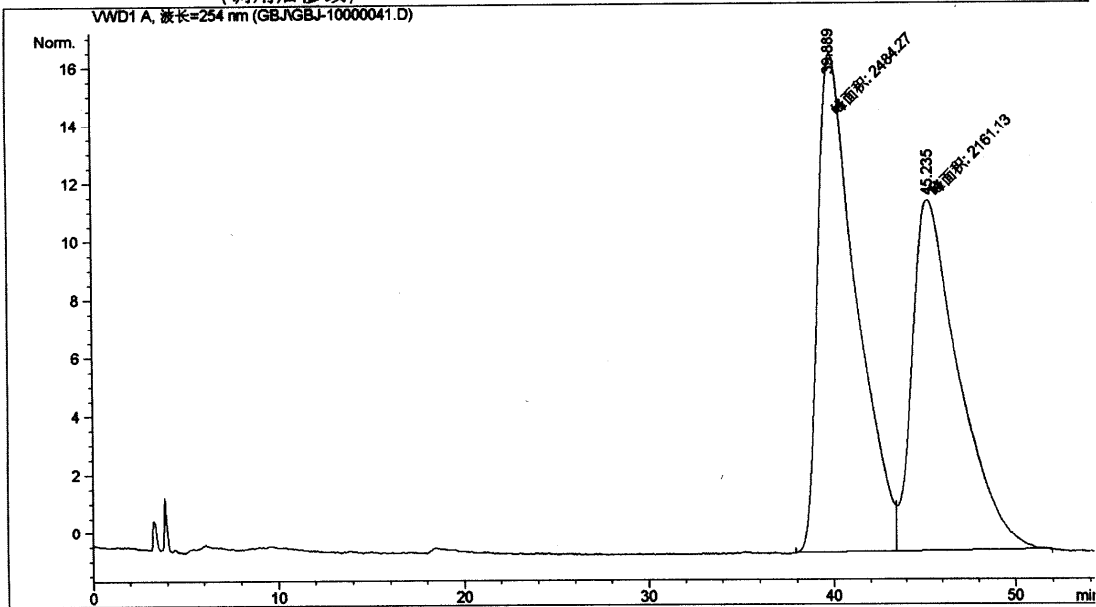

面积百分比报告

排序 : 信号  
 乘积因子 : 1.0000  
 稀释因子 : 1.0000  
 内标使用乘积因子和稀释因子

信号 1: VWD1 A, 波长=254 nm

| 峰 # | 保留时间 [min] | 类型 | 峰宽 [min] | 峰面积 mAU * s | 峰高 [mAU] | 峰面积 %   |
|-----|------------|----|----------|-------------|----------|---------|
| 1   | 39.889     | MF | 2.4175   | 2484.27271  | 17.12708 | 53.4781 |
| 2   | 45.235     | FM | 2.9932   | 2161.13184  | 12.03362 | 46.5219 |

总量 : 4645.40454 29.16069

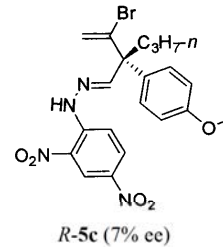

\*\*\* 报告结束 \*\*\*



文件 D:\Chem32\1\DATA\GBJ\GBJ-10000040.D  
 名称: gbj-10-23-rac

OD-H,n-Hexane/i-PrOH =70/30, 1.0 ml/min; 254 nm

=====  
 进样日期 : 2013-6-10 14:51:47  
 样品名称 : gbj-10-23-rac 位置 : -  
 操作者 : gbj  
 仪器 : 仪器 1  
 方法 : D:\CHEM32\1\METHODS\ZYY\_LC.M  
 最后修改 : 2013-6-10 14:50:34 : gbj  
 (调用后修改)

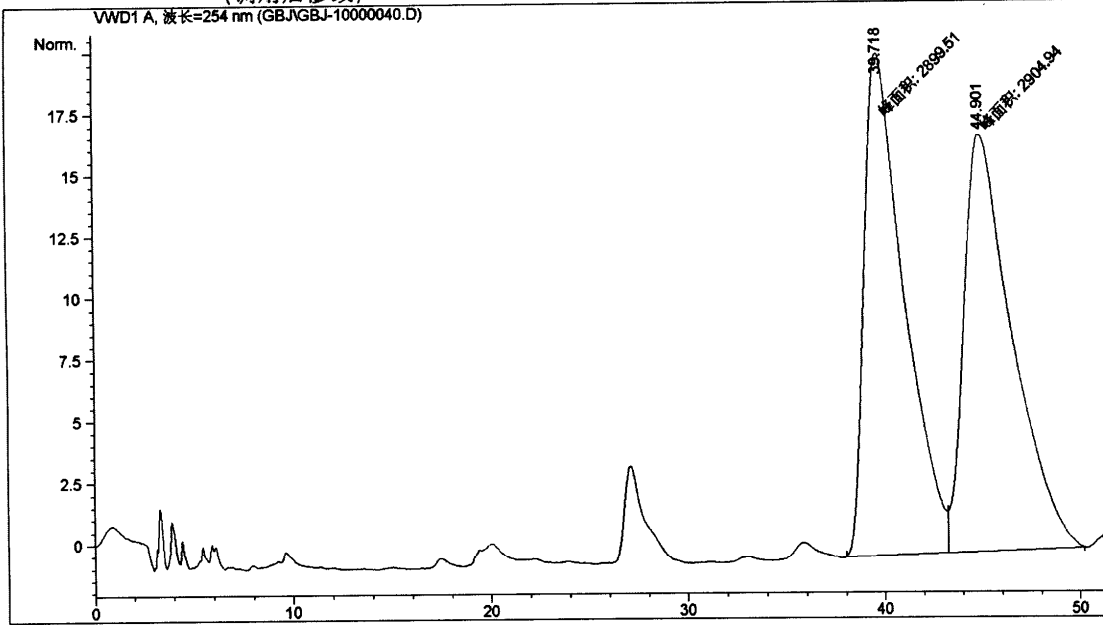

=====  
 面积百分比报告  
 =====

排序 : 信号  
 乘积因子 : 1.0000  
 稀释因子 : 1.0000  
 内标使用乘积因子和稀释因子

信号 1: VWD1 A, 波长=254 nm

| 峰 # | 保留时间 [min] | 类型 | 峰宽 [min] | 峰面积 mAU * s | 峰高 [mAU] | 峰面积 %   |
|-----|------------|----|----------|-------------|----------|---------|
| 1   | 39.718     | MF | 2.3709   | 2899.51367  | 20.38296 | 49.9532 |
| 2   | 44.901     | FM | 2.8643   | 2904.94263  | 16.90300 | 50.0468 |

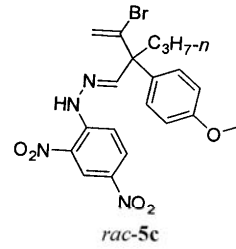

总量 : 5804.45630 37.28596

=====  
 \*\*\* 报告结束 \*\*\*

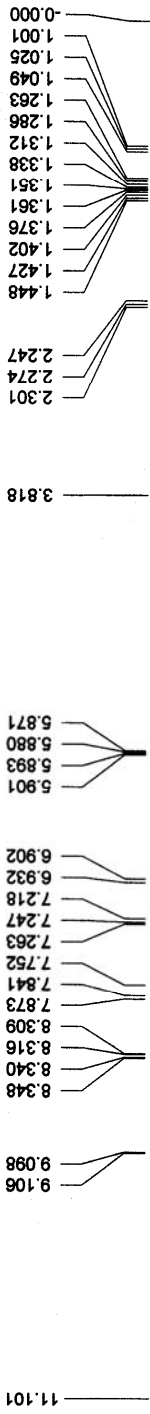

spect, CDC13,  
 Wed Jun 12 12:42:07 2013  
 USER: nmr  
 SOLVENT:  
 Experiment = zg30  
 Pulse length = 14.000 usec  
 Recycle delay = 1.000 sec  
 NA = 8  
 PTS1rd = 32768  
 F1 = 300.131866 MHz  
 F2 = 1.000000 MHz

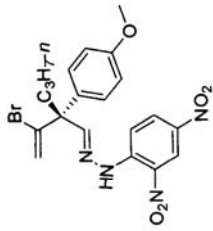

R-5c (99% ee)

gbj-10-23-2

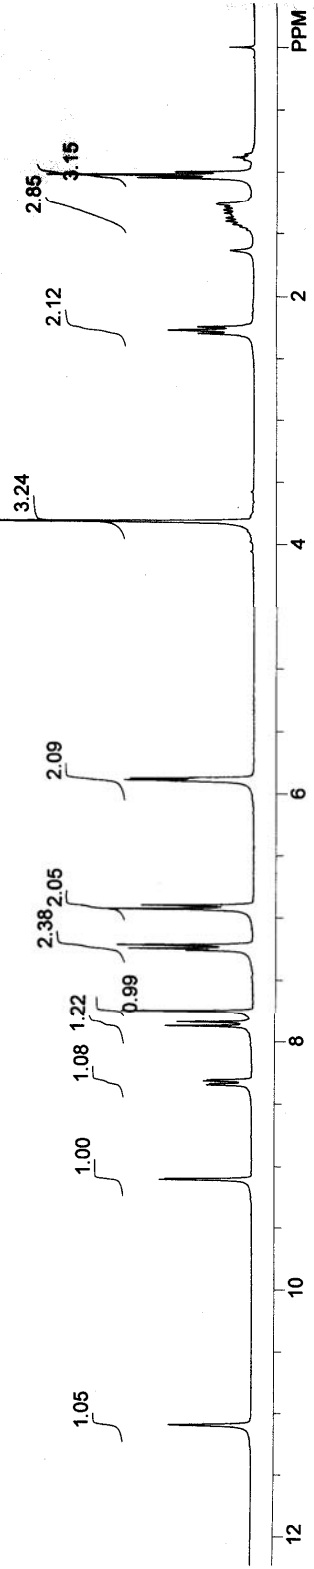

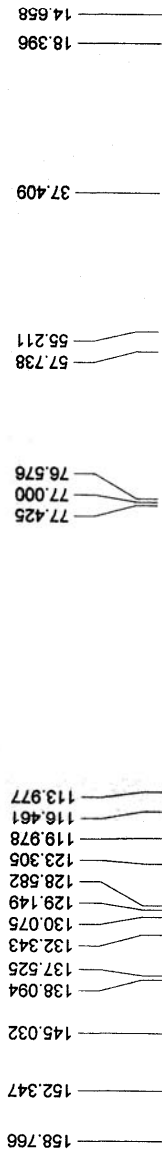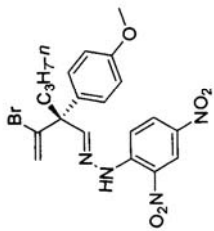

*R*-5c (99% ee)

spect, CDC13,  
Wed Jun 12 12:48:38 2013  
USER: nmf  
SOLVENT:  
Experiment = z09930  
Pulse length = 9.500 usec  
Recycle delay = 2.000 sec  
NA = 152  
P1S1d = 32768  
F1 = 75.476807 MHz  
F2 = 1.000000 MHz

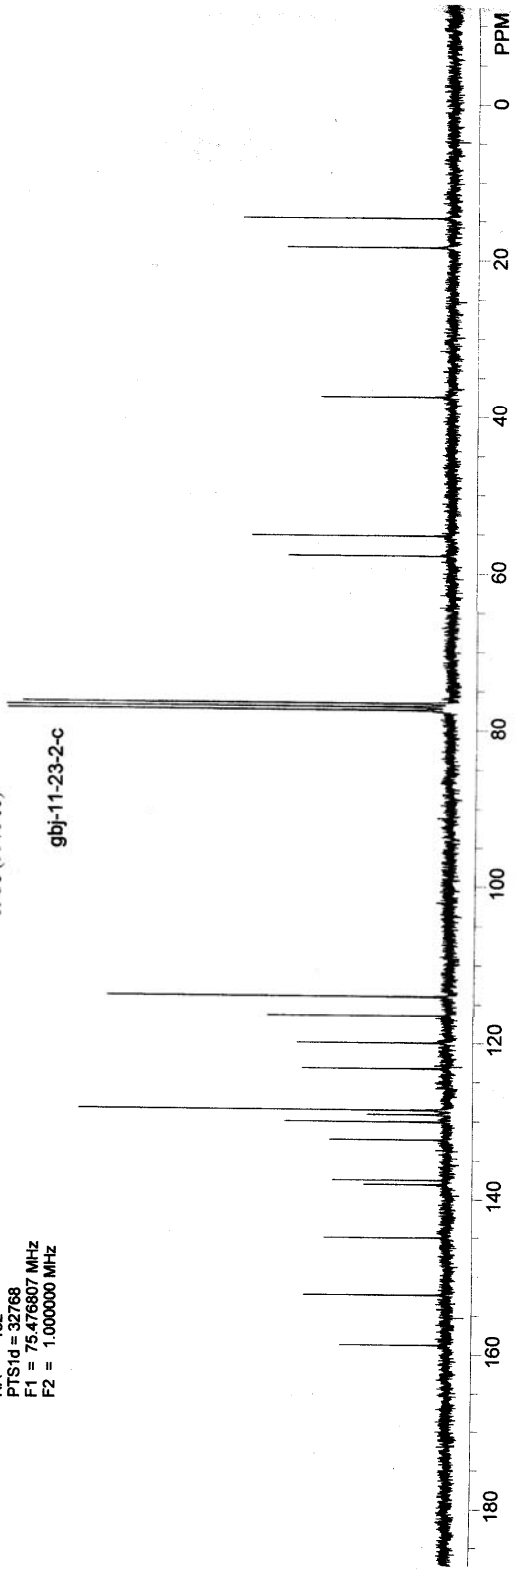

gbj-11-23-2-c

文件 D:\Chem32\1\DATA\GBJ\GBJ-1000044.D  
 名: gbj-10-23muye

OD-H, n-Hexane/i-PrOH =95/5, 1.0 ml/min; 254 nm

进样日期 : 2013-6-11 15:02:24  
 样品名称 : gbj-10-23muye  
 操作者 : gbj  
 仪器 : 仪器 1  
 方法 : D:\CHEM32\1\METHODS\ZYY\_LC.M  
 最后修改 : 2013-6-11 14:01:37 : gbj  
 (调用后修改)

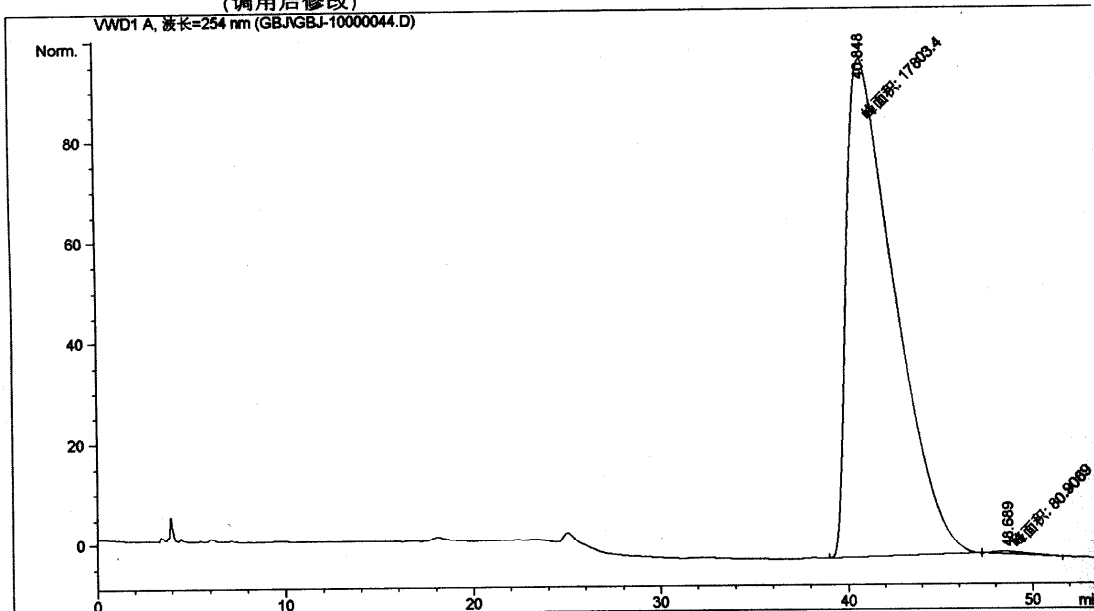

面积百分比报告

排序 : 信号  
 乘积因子 : 1.0000  
 稀释因子 : 1.0000  
 内标使用乘积因子和稀释因子

信号 1: VWD1 A, 波长=254 nm

| 峰 # | 保留时间 [min] | 类型 | 峰宽 [min] | 峰面积 mAU * s | 峰高 [mAU]   | 峰面积 %   |
|-----|------------|----|----------|-------------|------------|---------|
| 1   | 40.848     | MM | 3.0004   | 1.78034e4   | 98.89624   | 99.5476 |
| 2   | 48.689     | MM | 2.3683   | 80.90693    | 5.69382e-1 | 0.4524  |

总量 : 1.78843e4 99.46562

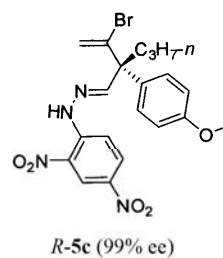

\*\*\* 报告结束 \*\*\*

数据文件 D:\CHEM32\1\DATA\GBJ\GBJ-10000040.D  
 样品名: gbj-10-23-rac

OD-H,n-Hexane/i-PrOH =70/30, 1.0 ml/min; 254 nm

```

=====
进样日期       : 2013-6-11 13:56:47
样品名称       : gbj-10-23-rac           位置   : -
操作者        : gbj
仪器           : 仪器 1
采集方法       : D:\CHEM32\1\METHODS\ZYY_LC.M
最后修改       : 2013-6-11 13:50:34   : gbj
                (调用后修改)
分析方法       : D:\CHEM32\1\METHODS\ZYY_LC.M
最后修改       : 2004-1-1 0:06:54    : wdx
                (调用后修改)
=====
  
```

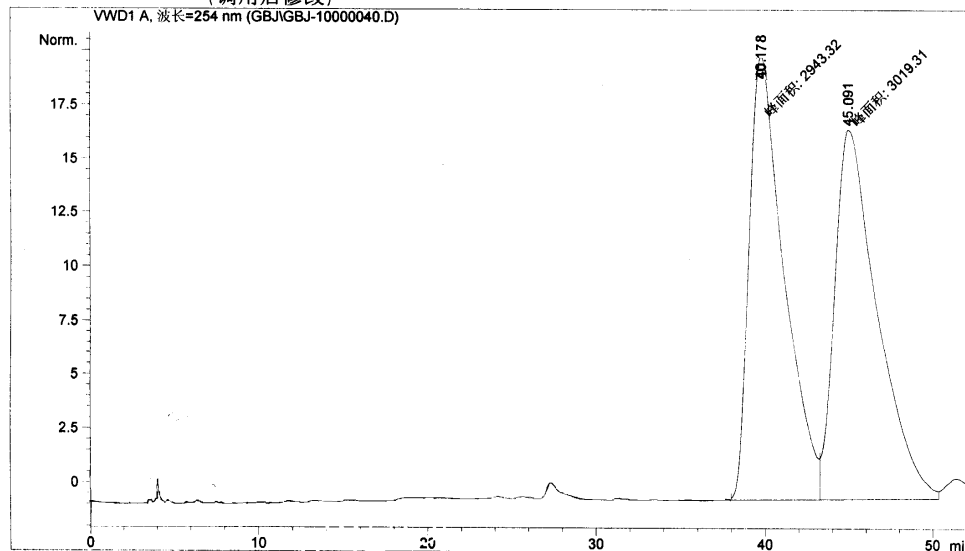

=====  
 面积百分比报告  
 =====

```

排序           :      信号
乘积因子       :      1.0000
稀释因子       :      1.0000
内标使用乘积因子和稀释因子
  
```

信号 1: VWD1 A, 波长=254 nm

| 峰 # | 保留时间 [min] | 类型 | 峰宽 [min] | 峰面积 mAU *s | 峰高 [mAU] | 峰面积 %   |
|-----|------------|----|----------|------------|----------|---------|
| 1   | 40.178     | MF | 2.3927   | 2943.32153 | 20.50200 | 49.3628 |
| 2   | 45.091     | FM | 2.9376   | 3019.30957 | 17.13020 | 50.6372 |

总量 : 5962.63110 37.63220

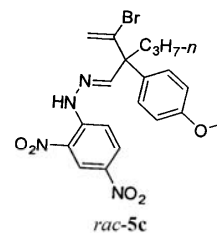

=====  
 \*\*\* 报告结束 \*\*\*  
 =====

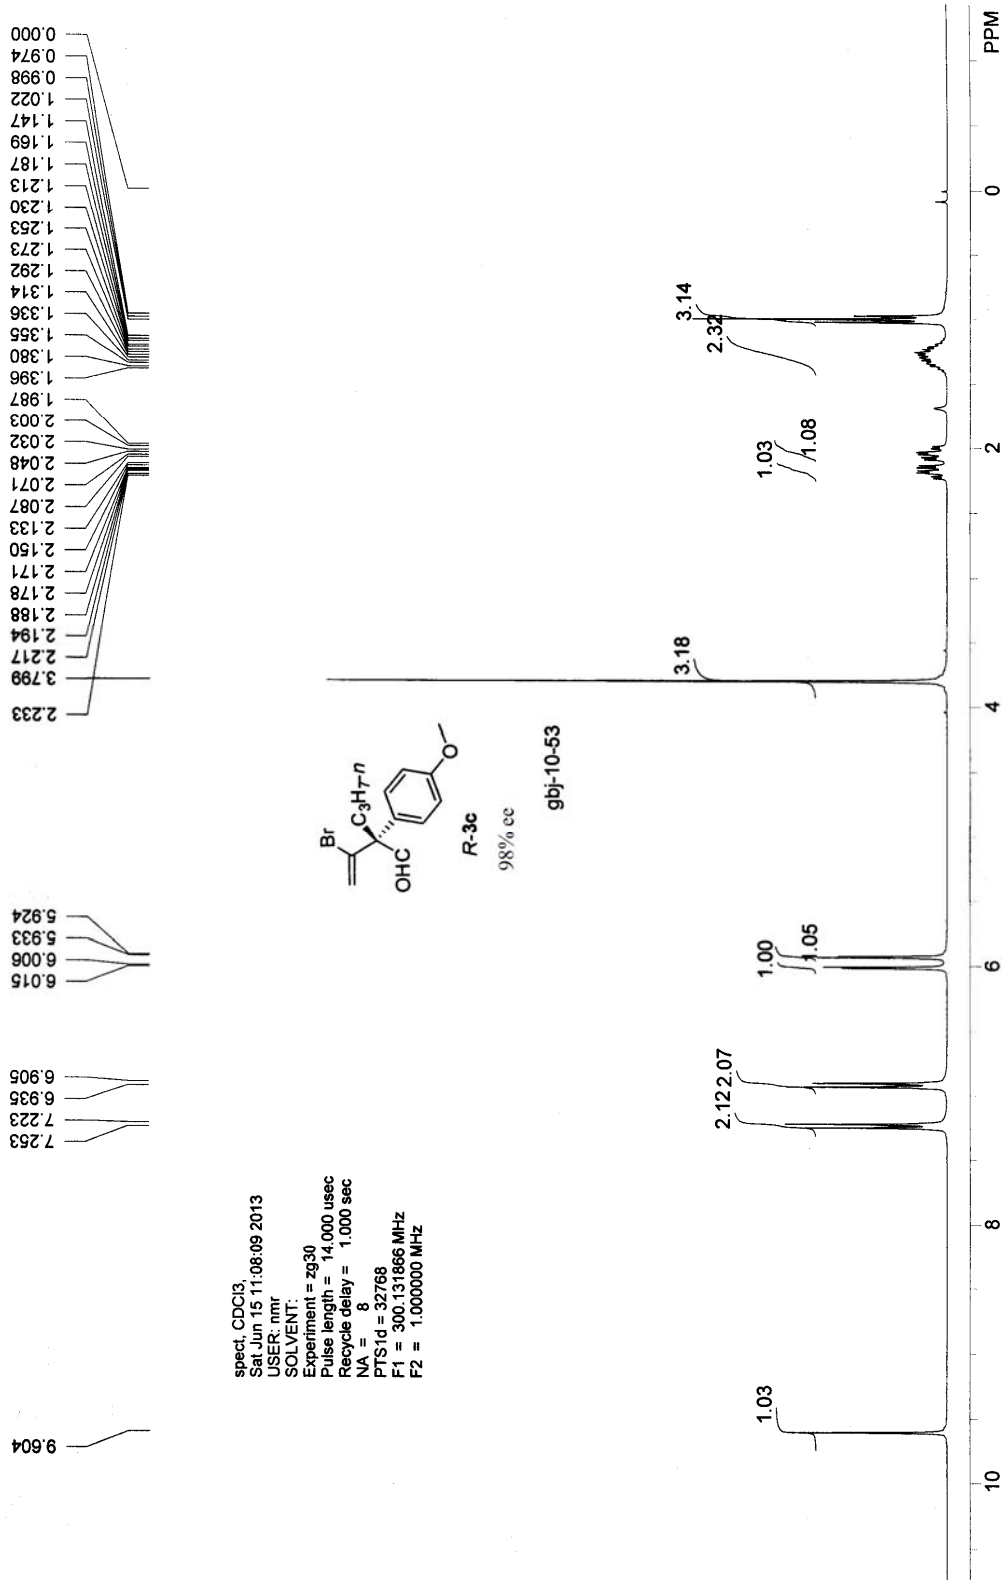

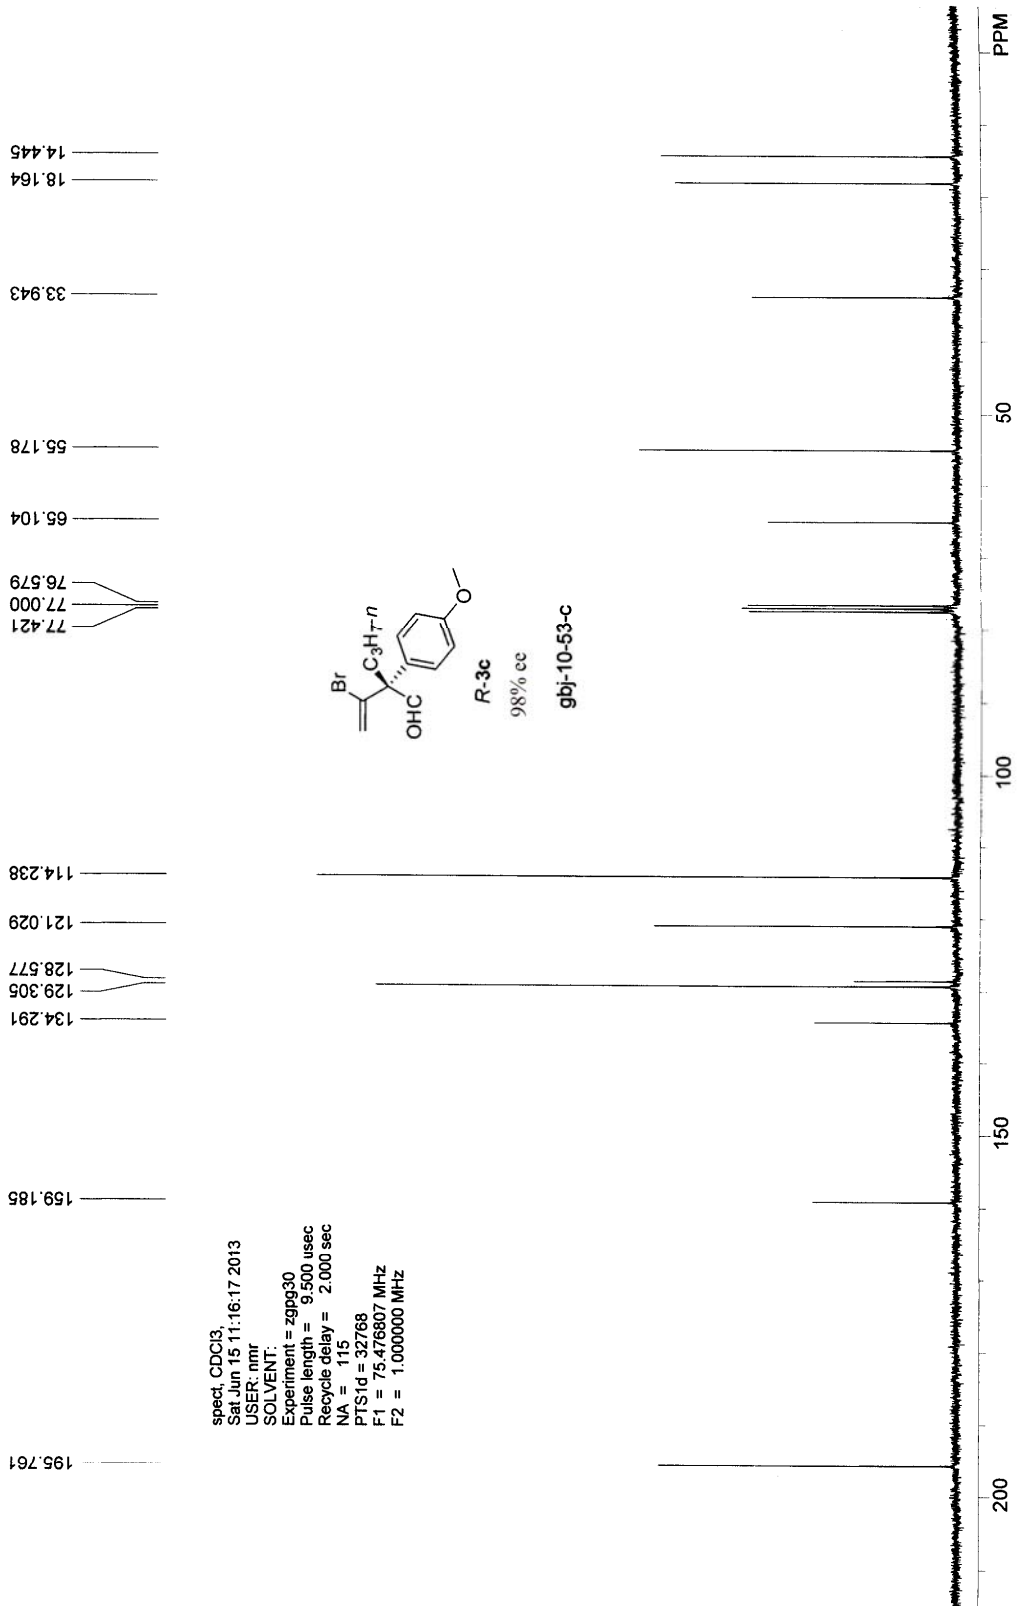

数据文件 D:\Chem32\1\DATA\GBJ\GBJ-1000052.D  
 样品名: gbj-10-53

OJ-H, n-Hexane/i-PrOH =80/20, 1.20 ml/min; 230 nm

=====  
 进样日期 : 2013-6-15 15:43:59  
 样品名称 : gbj-10-53 位置 : -  
 操作者 : gbj  
 仪器 : 仪器 1  
 方法 : D:\CHEM32\1\METHODS\ZYY\_LC.M  
 最后修改 : 2013-6-15 15:33:23 : lxj  
 (调用后修改)

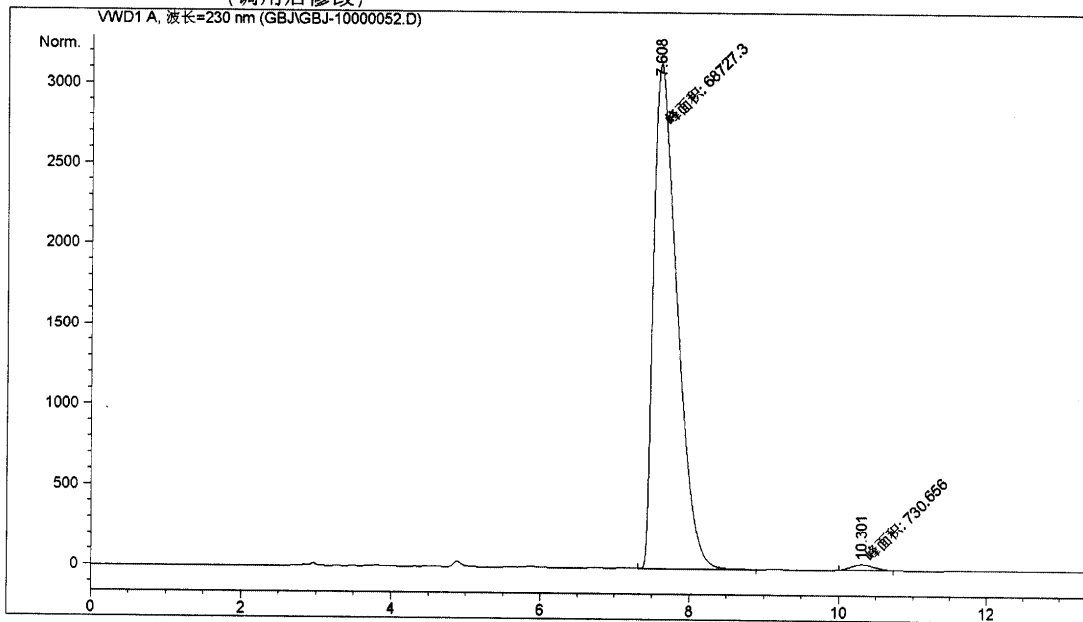

=====  
 面积百分比报告  
 =====

排序 : 信号  
 乘积因子 : 1.0000  
 稀释因子 : 1.0000  
 内标使用乘积因子和稀释因子

信号 1: VWD1 A, 波长=230 nm

| 峰 # | 保留时间 [min] | 类型 | 峰宽 [min] | 峰面积 mAU *s | 峰高 [mAU]   | 峰面积 %   |
|-----|------------|----|----------|------------|------------|---------|
| 1   | 7.608      | MM | 0.3646   | 6.87273e4  | 3141.51123 | 98.9481 |
| 2   | 10.301     | MM | 0.3568   | 730.65613  | 34.12573   | 1.0519  |

总量 : 6.94580e4 3175.63696

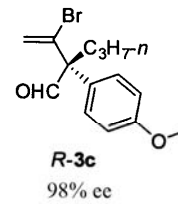

=====  
 \*\*\* 报告结束 \*\*\*  
 =====



数据文件 D:\Chem32\1\DATA\GBJ\GBJ-10000055.D  
 样品名: gbj-10-53-rac

OJ-H, n-Hexane/i-PrOH =80/20, 1.20 ml/min; 230 nm

=====  
 进样日期 : 2013-6-15 16:31:13  
 样品名称 : gbj-10-53-rac 位置 : -  
 操作者 : gbj  
 仪器 : 仪器 1  
 方法 : D:\CHEM32\1\METHODS\ZYY\_LC.M  
 最后修改 : 2013-6-15 15:33:23 : lxj  
 (调用后修改)  
 =====

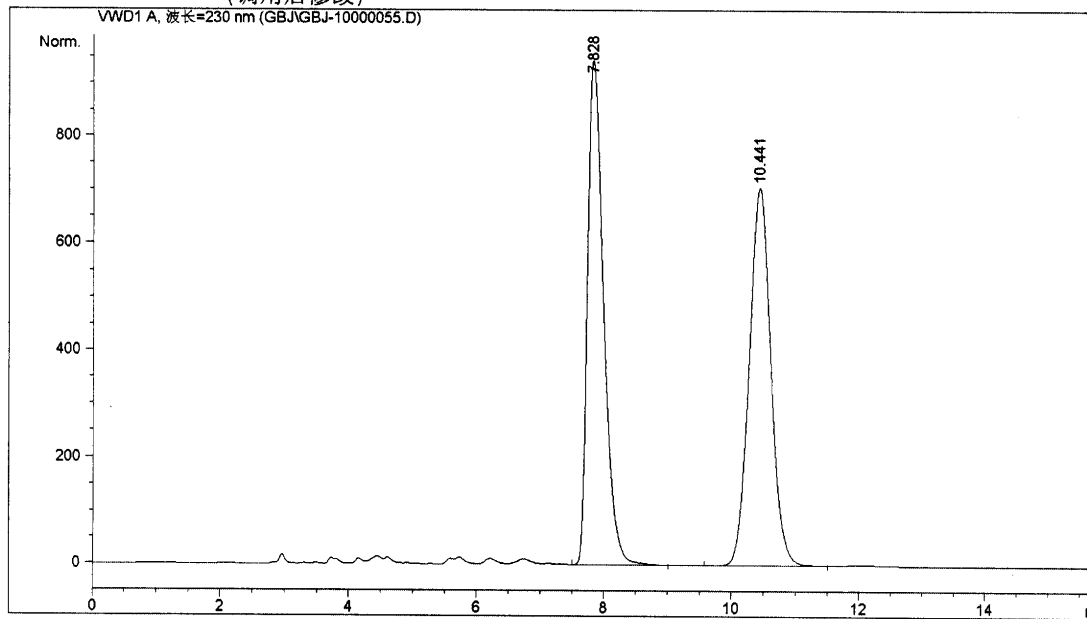

=====  
 面积百分比报告  
 =====

排序 : 信号  
 乘积因子 : 1.0000  
 稀释因子 : 1.0000  
 内标使用乘积因子和稀释因子

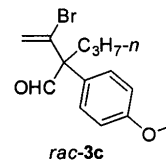

信号 1: VWD1 A, 波长=230 nm

| 峰 # | 保留时间 [min] | 类型 | 峰宽 [min] | 峰面积 mAU *s | 峰高 [mAU]  | 峰面积 %   |
|-----|------------|----|----------|------------|-----------|---------|
| 1   | 7.828      | VB | 0.2708   | 1.66321e4  | 945.34326 | 49.9513 |
| 2   | 10.441     | VB | 0.3613   | 1.66645e4  | 705.97638 | 50.0487 |

总量 : 3.32966e4 1651.31964

=====  
 \*\*\* 报告结束 \*\*\*  
 =====

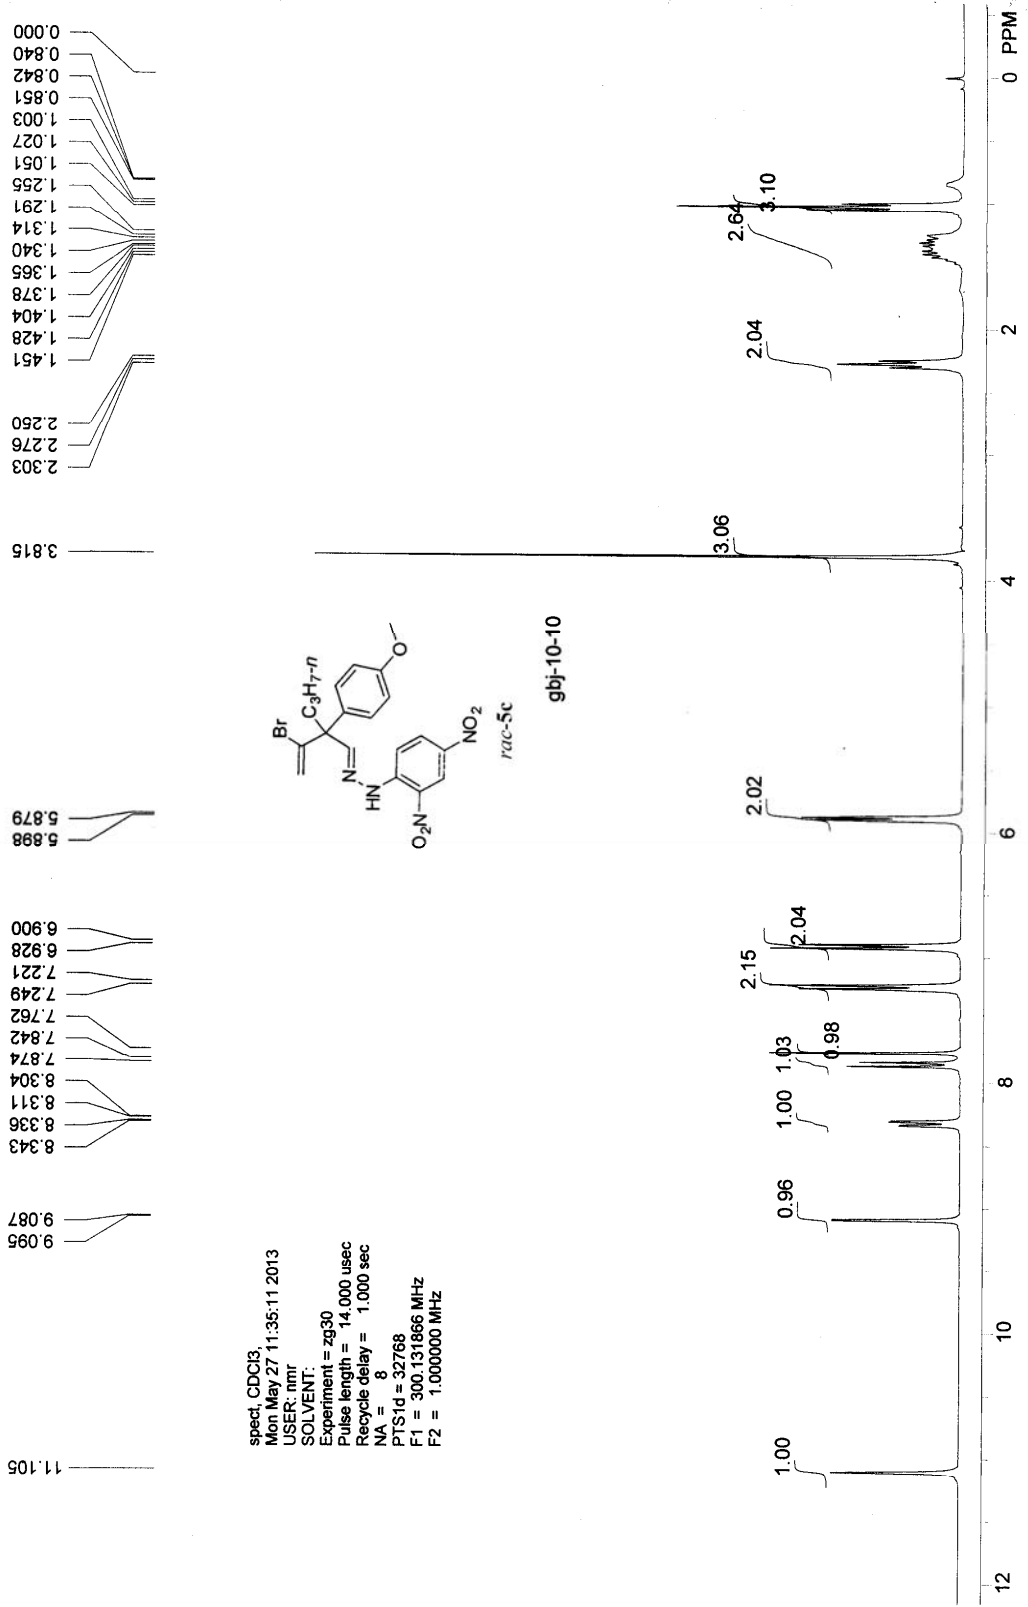

spect. CDC13,  
 Mon May 27 11:35:11 2013  
 USER: mhr  
 SOLVENT:  
 Experiment = zg30  
 Pulse length = 14.000 usec  
 Recycle delay = 1.000 sec  
 NA = 8  
 PTS1d = 32768  
 F1 = 300.131866 MHz  
 F2 = 1.0000000 MHz

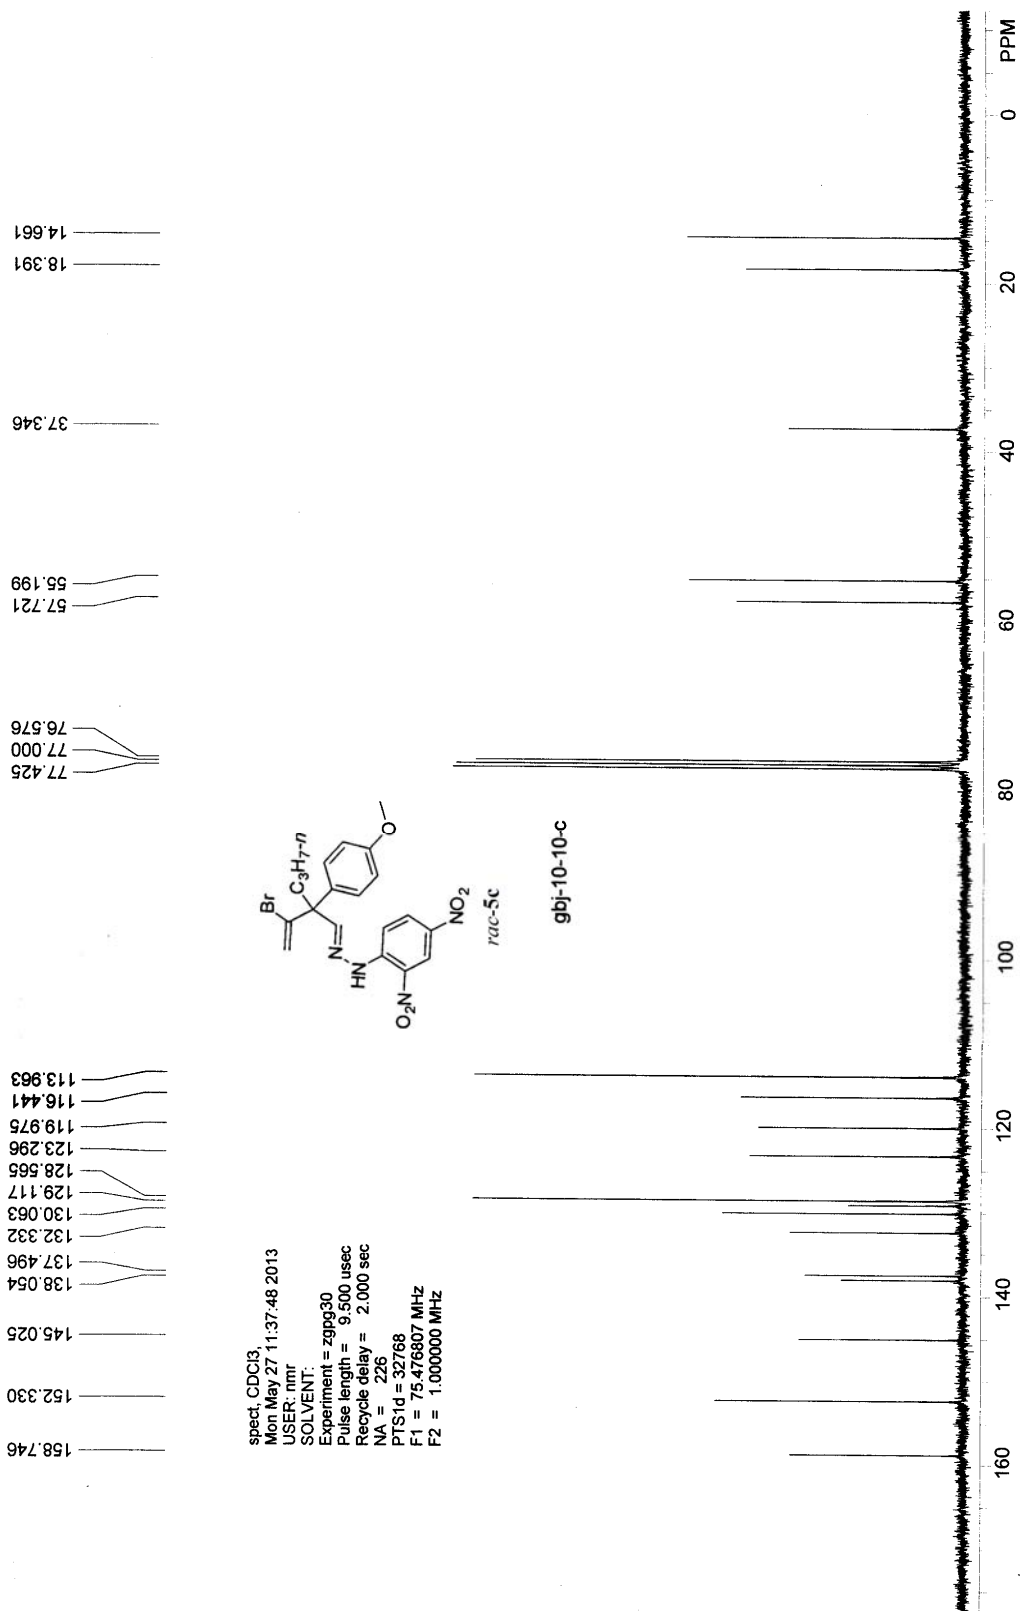

spect\_CDCI3  
 Mon May 27 11:37:48 2013  
 USER: nmr  
 SOLVENT:  
 Experiment = zgpg30  
 Pulse length = 9.500 usec  
 Recycle delay = 2.000 sec  
 NA = 226  
 PTS1d = 32768  
 F1 = 75.476807 MHz  
 F2 = 1.000000 MHz

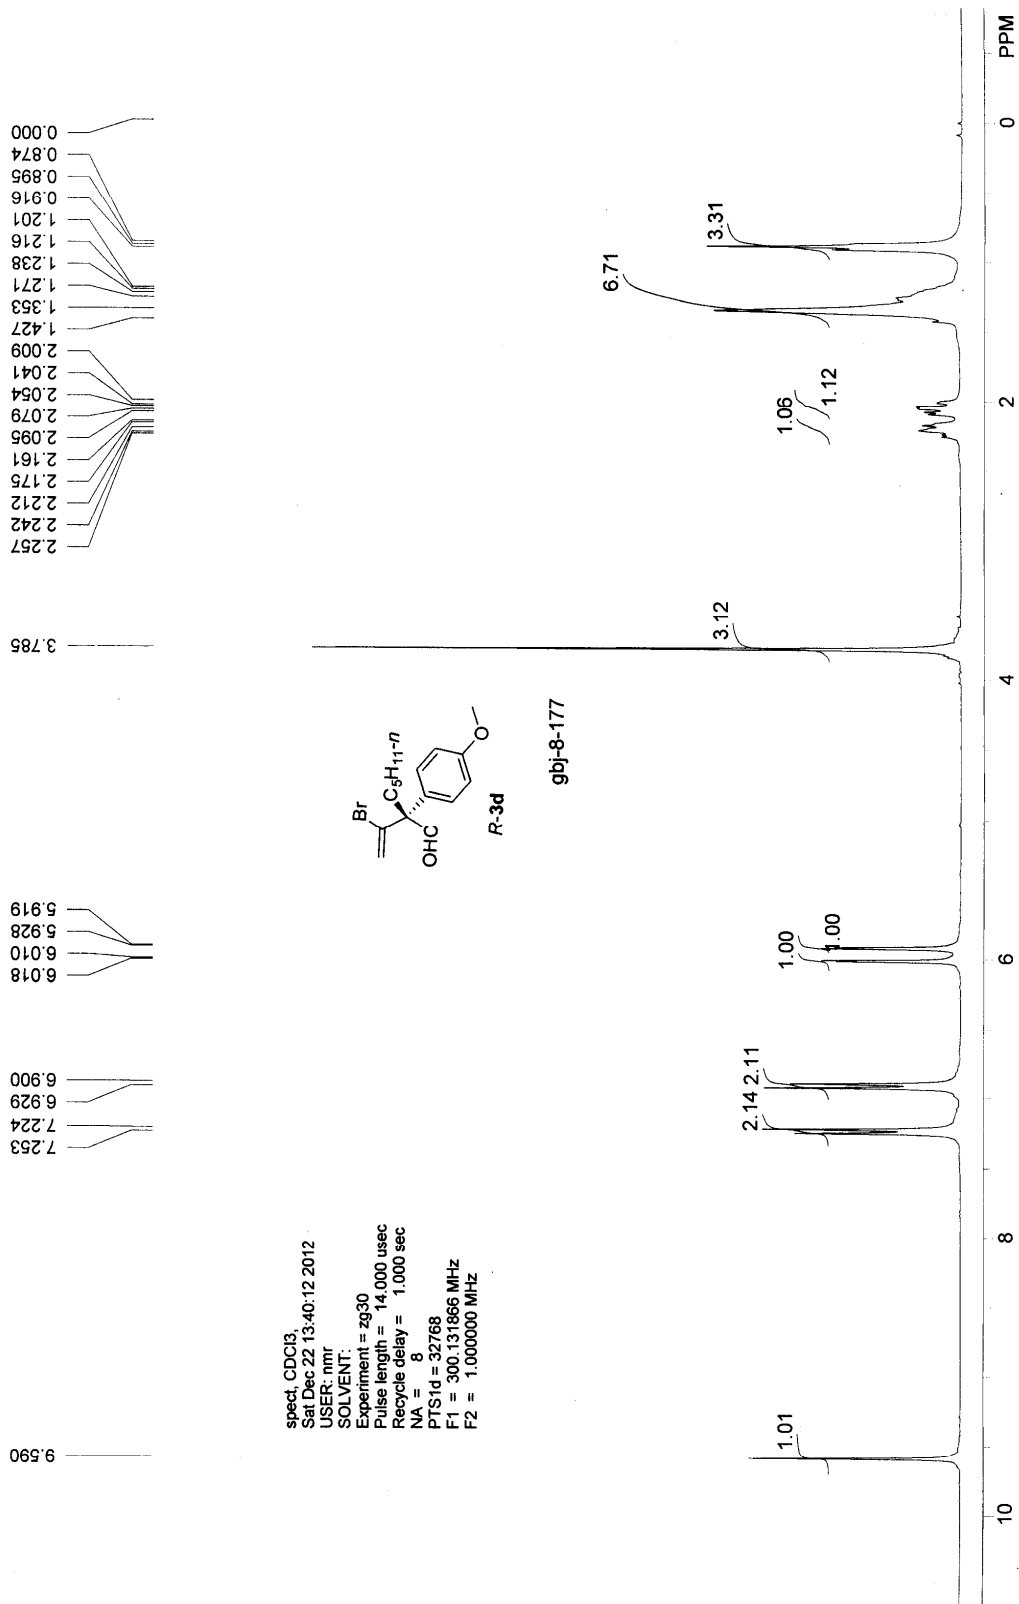

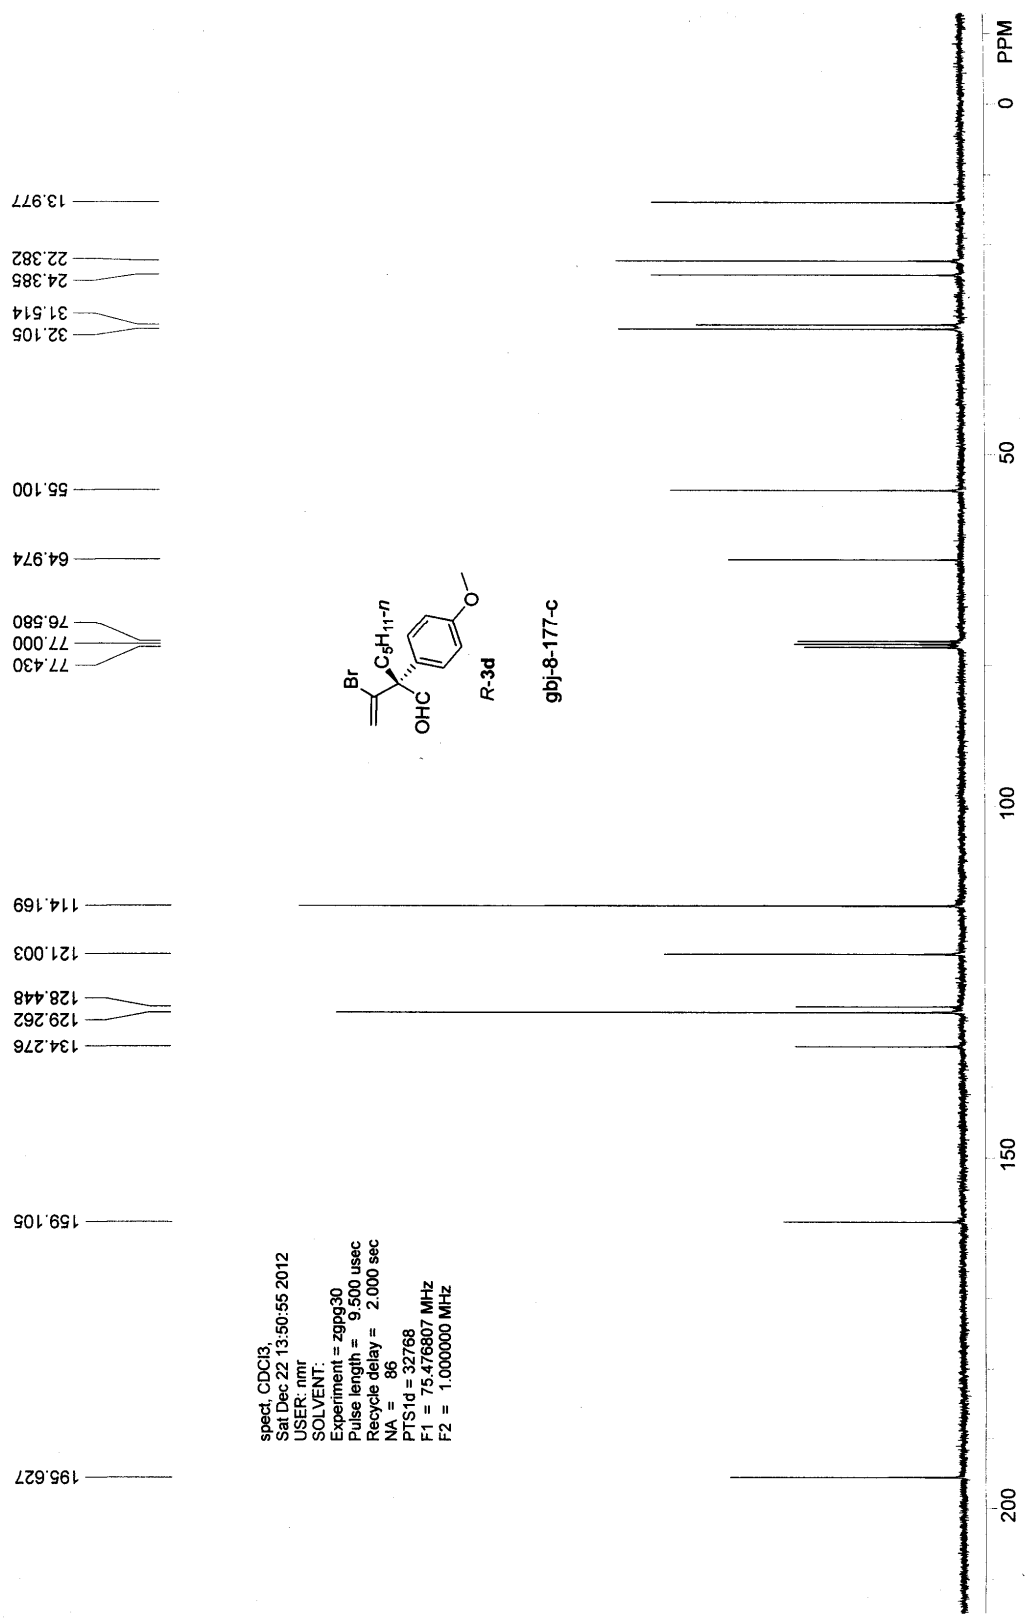

spect, CDC13,  
 Sat Dec 22 13:50:55 2012  
 USER: nmr  
 SOLVENT:  
 Experiment = zopg30  
 Pulse length = 9.500 usec  
 Recycle delay = 2.000 sec  
 NA = 86  
 P1S1d = 32768  
 F1 = 75.476807 MHz  
 F2 = 1.000000 MHz

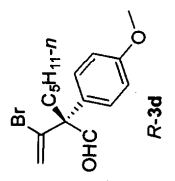

gbj-8-177-c

OJ-H, n-Hexane:i-PrOH = 80/20, 1.2 mL/min, 230 nm

```

=====
Injection Date : 12/17/2012 12:52:55 AM
Sample Name    : gbj-8-177
Acq. Operator  : gbj
Method         : D:\HPCHEM\1\METHODS\XFX_LC.M
Last changed   : 12/17/2012 12:02:59 AM by zyy
                (modified after loading)
Location      : -
=====

```

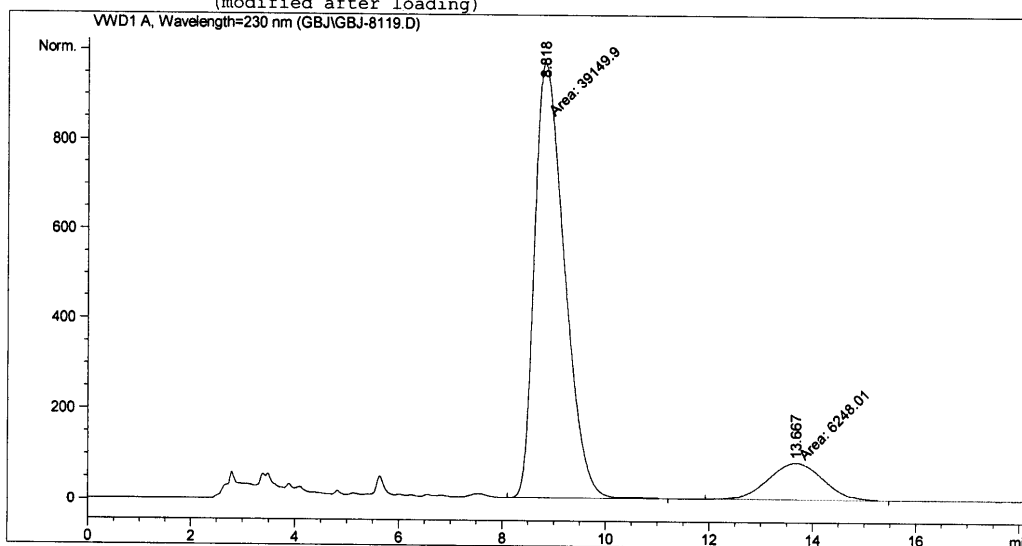

```

=====
Area Percent Report
=====

```

```

Sorted By      : Signal
Multiplier     : 1.0000
Dilution       : 1.0000
Use Multiplier & Dilution Factor with ISTDs

```

Signal 1: VWD1 A, Wavelength=230 nm

| Peak # | RetTime [min] | Type | Width [min] | Area mAU   | Height [mAU] | Area %  |
|--------|---------------|------|-------------|------------|--------------|---------|
| 1      | 8.818         | MM   | 0.6727      | 3.91499e4  | 970.00580    | 86.2372 |
| 2      | 13.667        | MM   | 1.2618      | 6248.00537 | 82.53072     | 13.7628 |

```
Totals :                4.53979e4  1052.53651
```

Results obtained with enhanced integrator!

```

=====
*** End of Report ***
=====

```

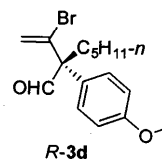

OJ-H, n-Hexane:i-PrOH = 80/20, 1.2 mL/min, 230 nm

```

=====
Injection Date : 12/17/2012 1:12:09 AM
Sample Name    : gbj-8-176                Location   : -
Acq. Operator  : gbj
Method         : D:\HPCHEM\1\METHODS\XFX LC.M
Last changed   : 12/17/2012 12:02:59 AM By zyy
                  (modified after loading)
=====
    
```

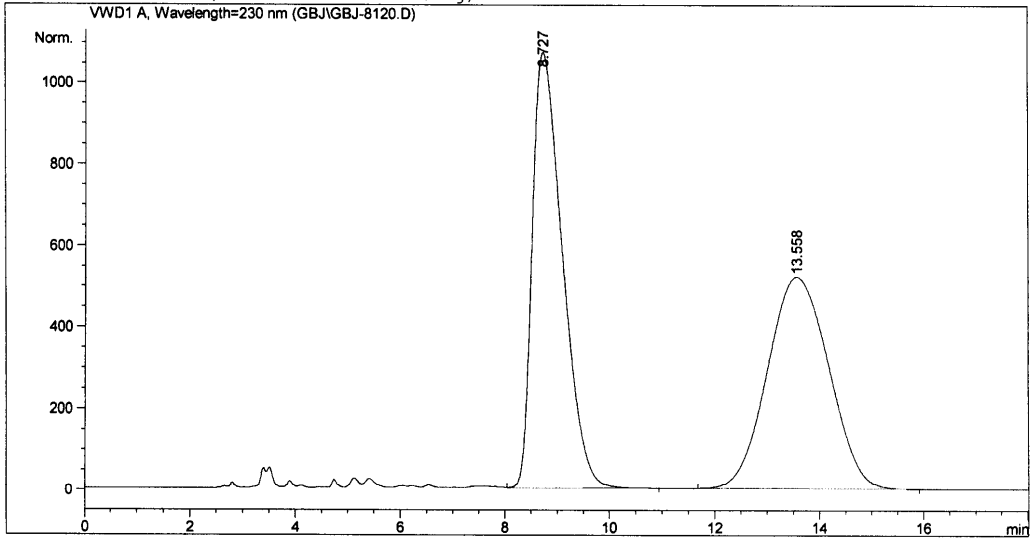

=====  
 Area Percent Report  
 =====

```

Sorted By      : Signal
Multiplier     : 1.0000
Dilution       : 1.0000
Use Multiplier & Dilution Factor with ISTDs
    
```

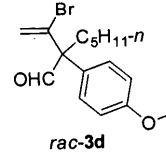

Signal 1: VWD1 A, Wavelength=230 nm

| Peak # | RetTime [min] | Type | Width [min] | Area mAU  | Area *s    | Height [mAU] | Area % |
|--------|---------------|------|-------------|-----------|------------|--------------|--------|
| 1      | 8.727         | VB   | 0.6163      | 4.29738e4 | 1071.87573 | 50.2843      |        |
| 2      | 13.558        | BB   | 1.3078      | 4.24879e4 | 518.81262  | 49.7157      |        |

Totals : 8.54618e4 1590.68835

Results obtained with enhanced integrator!

=====  
 \*\*\* End of Report \*\*\*

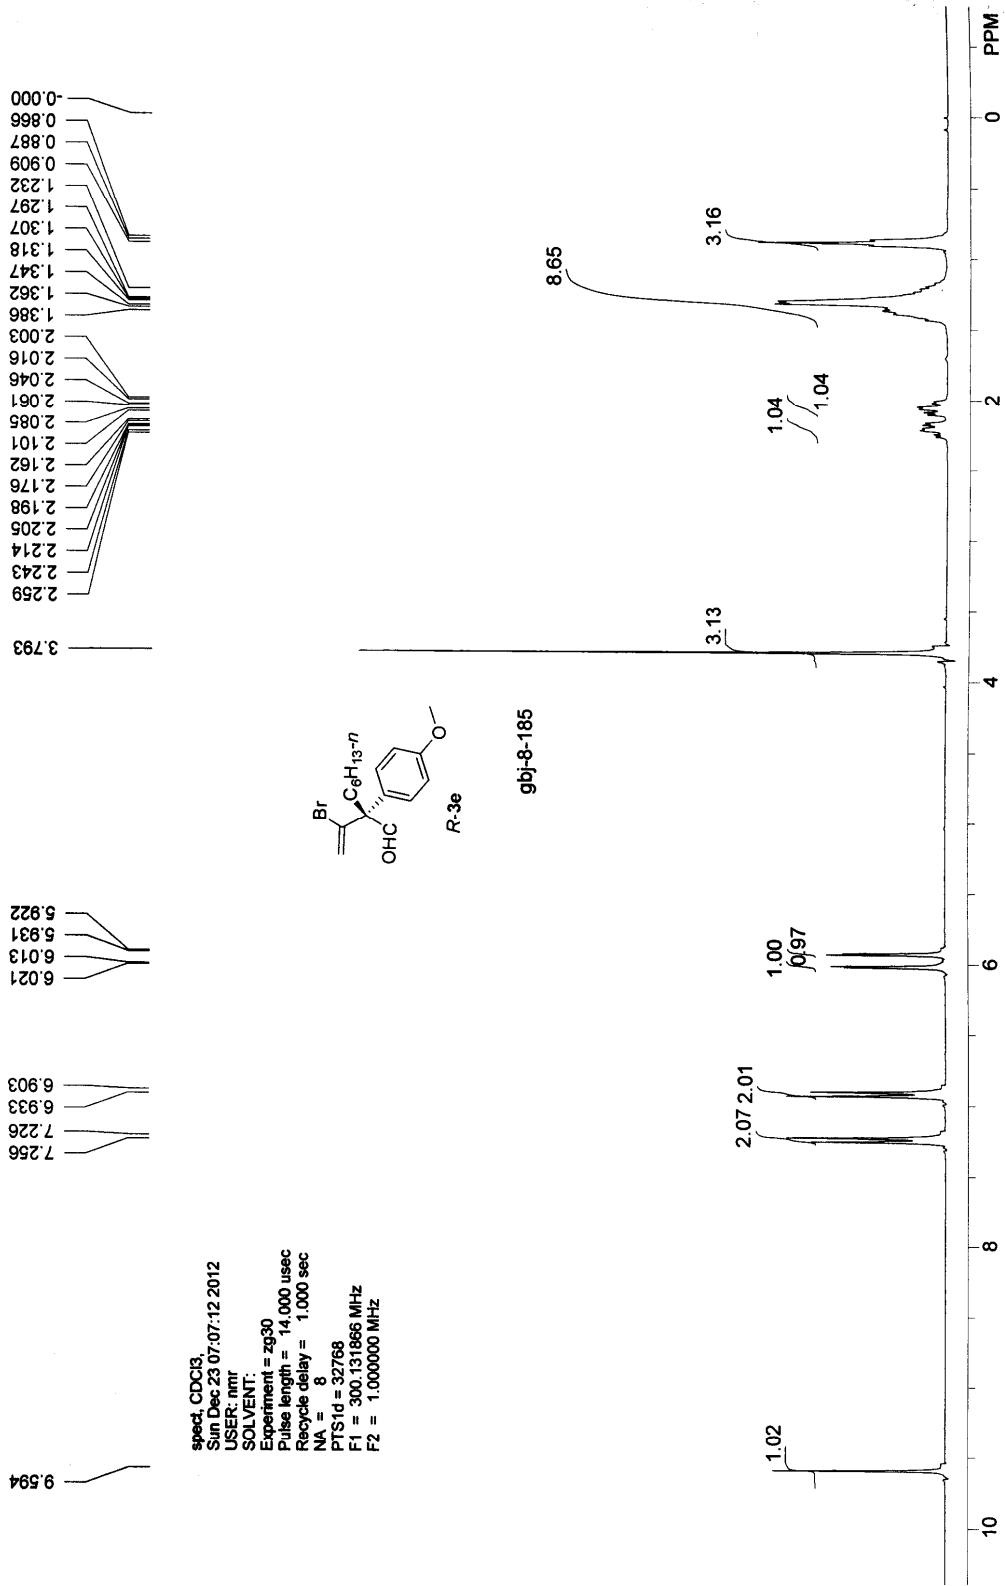



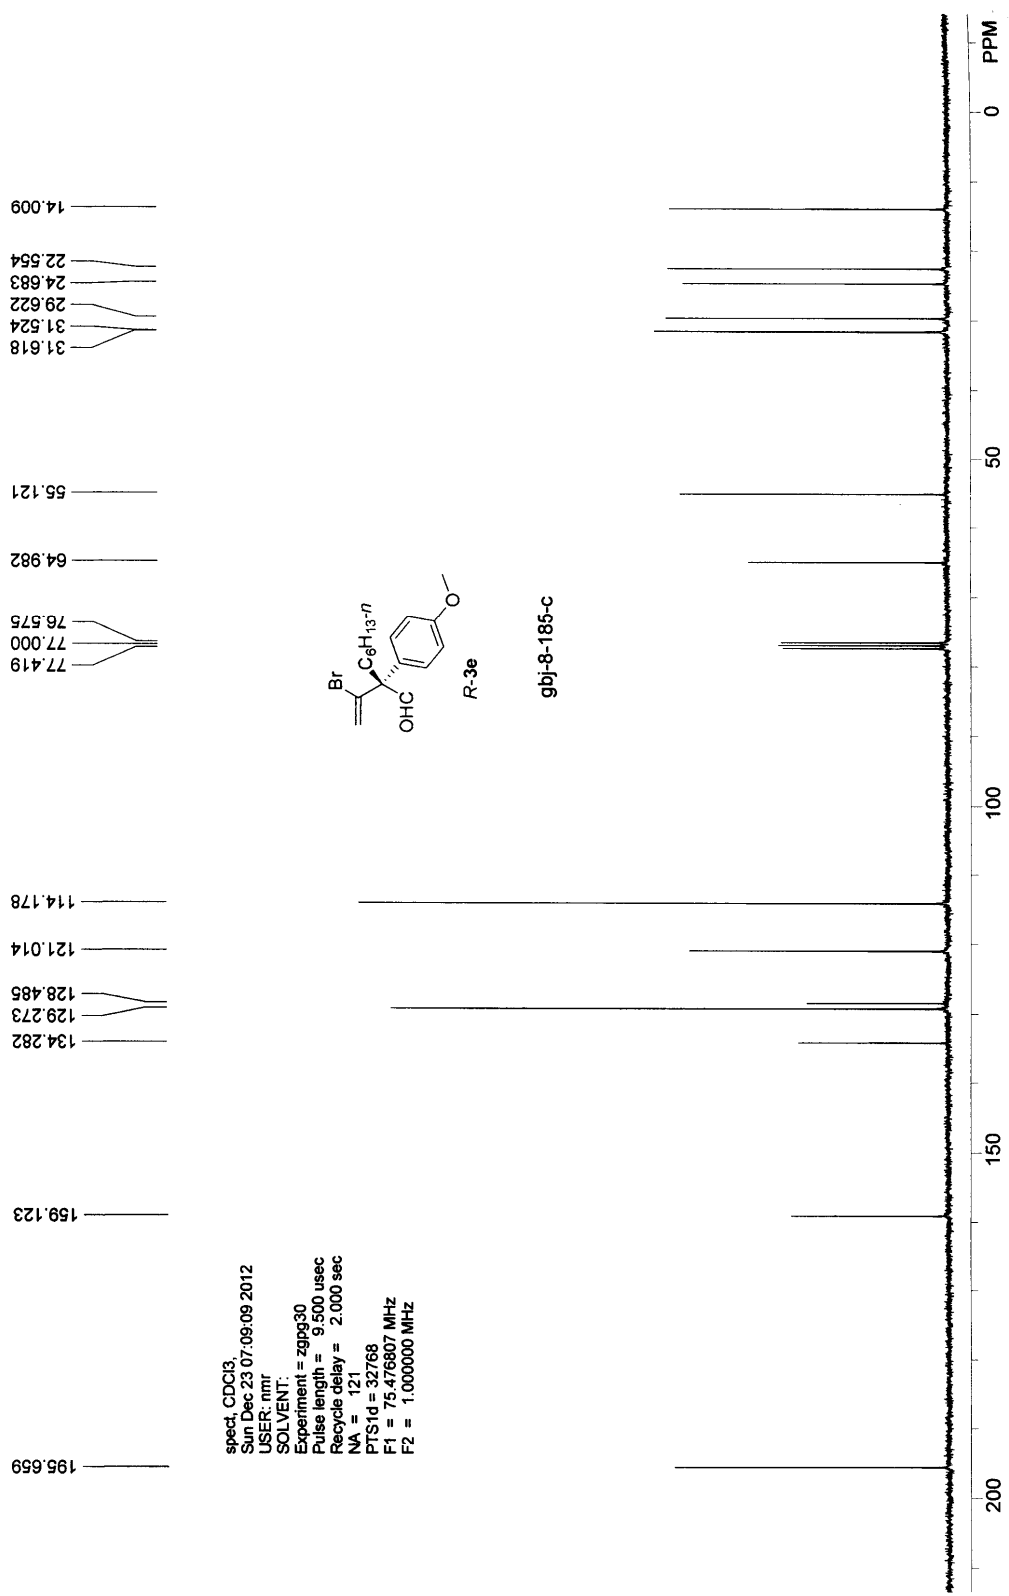

OJ-H, n-Hexane:i-PrOH= 80/20, 1.2 mL/min, 230 nm

```

=====
Injection Date : 12/25/2012 9:47:08 AM
Sample Name    : gbj-8-185
Acq. Operator  : gbj
Method         : D:\HPCHEM\1\METHODS\XFX_LC.M
Last changed   : 12/25/2012 9:09:59 AM by qhj
                  (modified after loading)
Location      : -
    
```

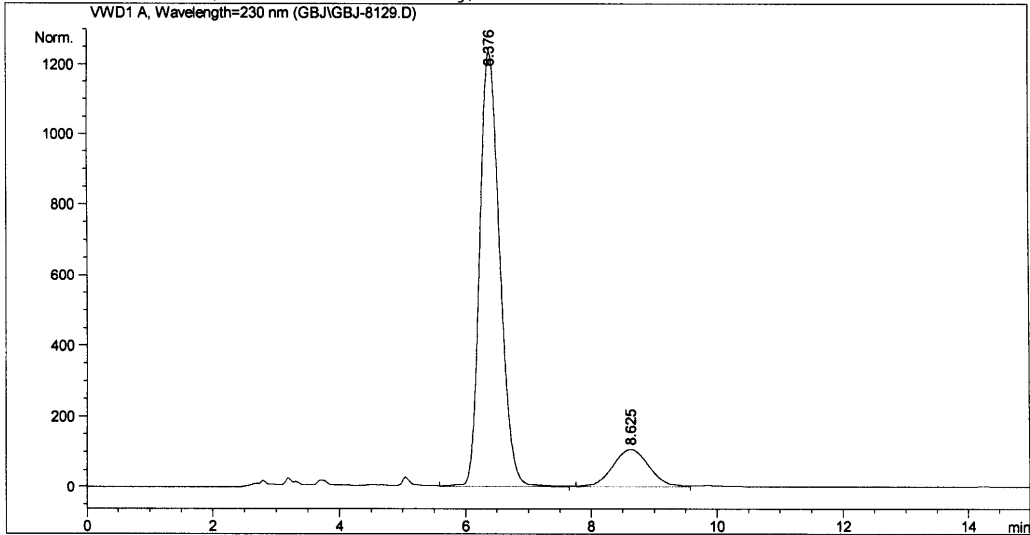

Area Percent Report

```

=====
Sorted By      : Signal
Multiplier     : 1.0000
Dilution       : 1.0000
Use Multiplier & Dilution Factor with ISTDs
    
```

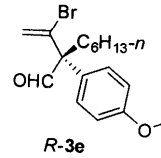

Signal 1: VWD1 A, Wavelength=230 nm

| Peak # | RetTime [min] | Type | Width [min] | Area mAU   | Area *s    | Height [mAU] | Area % |
|--------|---------------|------|-------------|------------|------------|--------------|--------|
| 1      | 6.376         | VB   | 0.3437      | 2.75027e4  | 1237.72107 | 85.9990      |        |
| 2      | 8.625         | BV   | 0.6495      | 4477.56201 | 107.39820  | 14.0010      |        |

Totals : 3.19803e4 1345.11927

Results obtained with enhanced integrator!

\*\*\* End of Report \*\*\*

OJ-H, n-Hexane:i-PrOH= 80/20, 1.2 mL/min, 230 nm

```

=====
Injection Date   : 12/25/2012 9:30:27 AM
Sample Name     : gbj-8-184
Acq. Operator  : gbj
Method         : D:\HPCHEM\1\METHODS\XFX_LC.M
Last changed   : 12/25/2012 9:09:59 AM by qhj
                (modified after loading)
=====

```

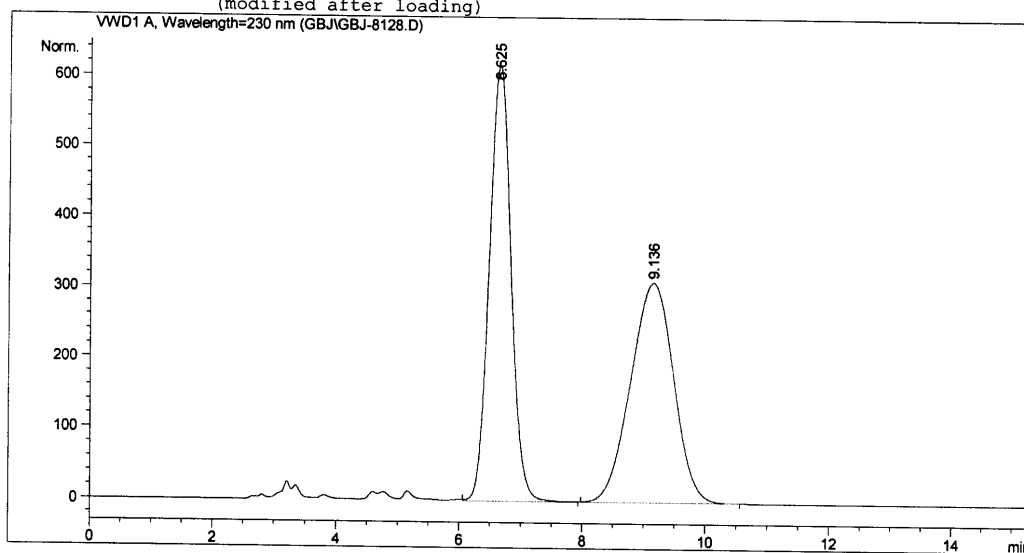

```

=====
Area Percent Report
=====

```

```

Sorted By       : Signal
Multiplier     : 1.0000
Dilution       : 1.0000
Use Multiplier & Dilution Factor with ISTDs

```

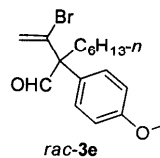

Signal 1: VWD1 A, Wavelength=230 nm

| Peak # | RetTime [min] | Type | Width [min] | Area mAU *s | Height [mAU] | Area %  |
|--------|---------------|------|-------------|-------------|--------------|---------|
| 1      | 6.625         | VB   | 0.3825      | 1.51787e4   | 618.35791    | 50.1408 |
| 2      | 9.136         | BB   | 0.7606      | 1.50935e4   | 311.39893    | 49.8592 |

```
Totals :                3.02723e4  929.75684
```

Results obtained with enhanced integrator!

```

=====
*** End of Report ***
=====

```

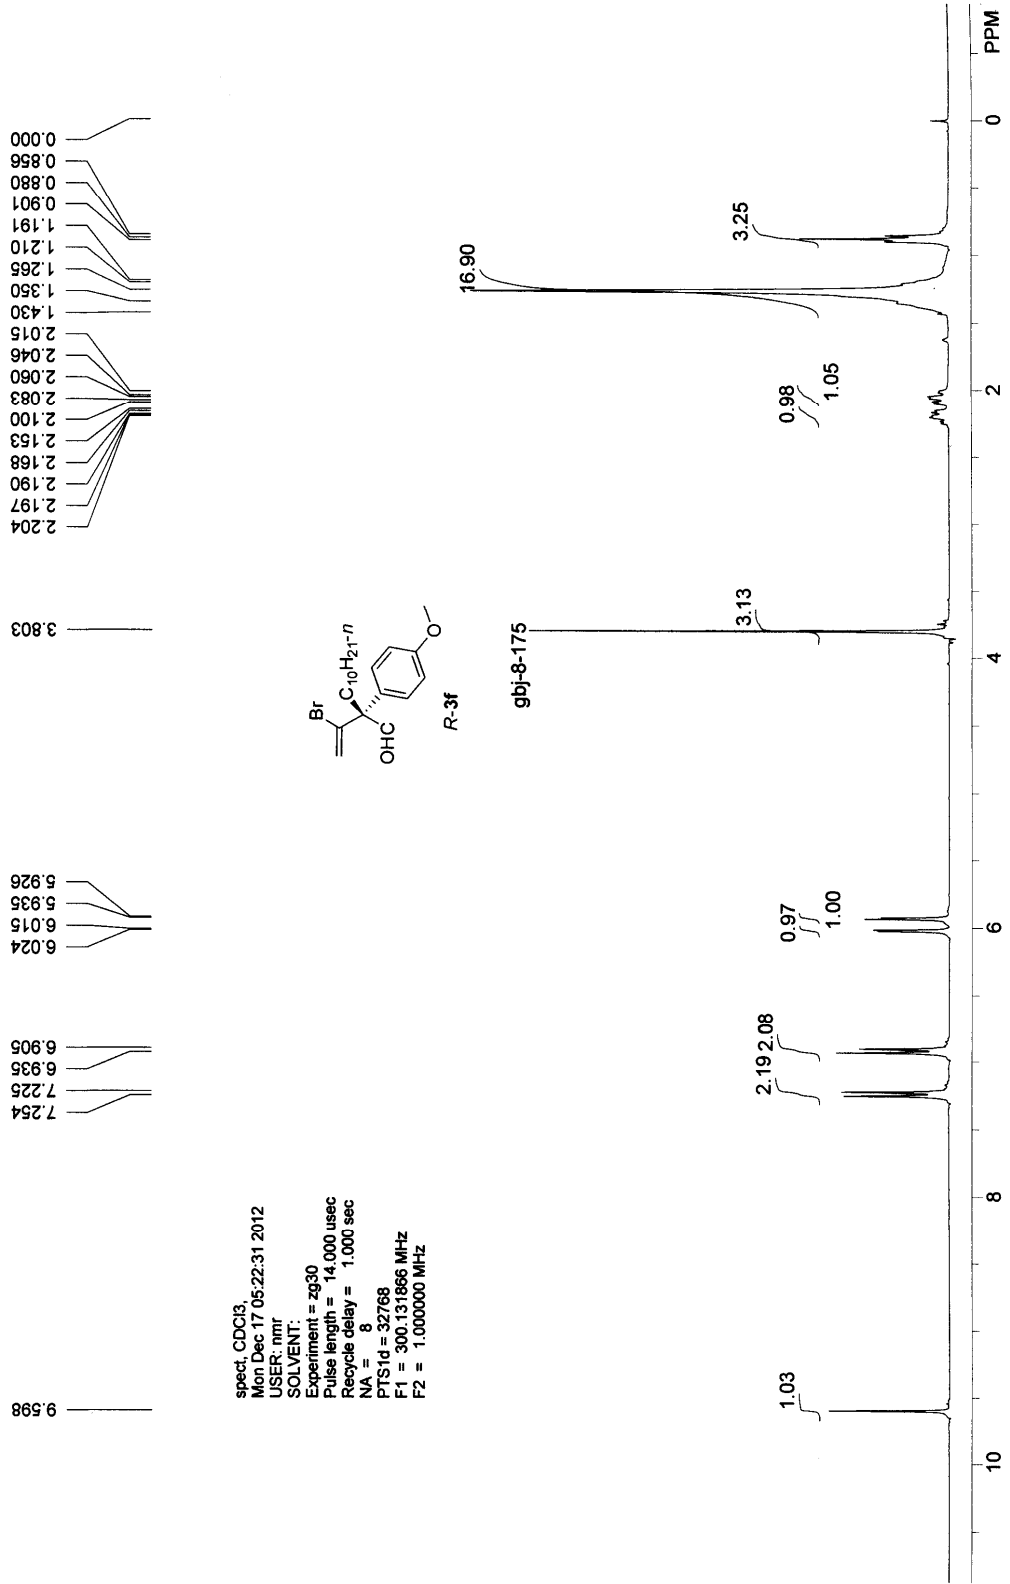

spectr CDC13  
 Mon Dec 17 05:22:31 2012  
 USER: nmr  
 SOLVENT:  
 Experiment = zg30  
 Pulse length = 14.000 usec  
 Recycle delay = 1.000 sec  
 NA = 8  
 P1 = 32768  
 F1 = 300.131866 MHz  
 F2 = 1.000000 MHz

9.598  
 7.254  
 7.225  
 6.935  
 6.905  
 6.024  
 6.015  
 5.935  
 5.926  
 3.803  
 2.204  
 2.197  
 2.190  
 2.168  
 2.153  
 2.100  
 2.083  
 2.060  
 2.046  
 2.015  
 1.430  
 1.350  
 1.265  
 1.210  
 1.191  
 0.901  
 0.880  
 0.856  
 0.000

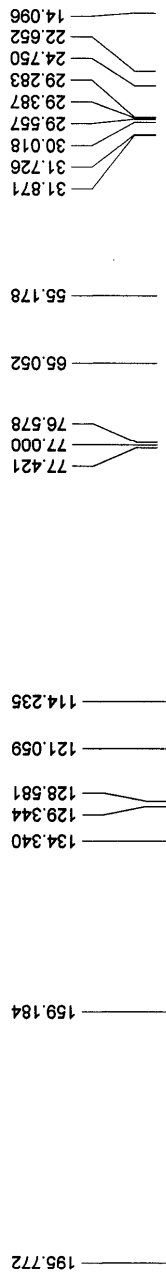

spect\_CDCI3  
 Mon Dec 17 05:26:19 2012  
 USER: nmr  
 SOLVENT:  
 Experiment = zgpg30  
 Pulse length = 9.500 usec  
 Recycle delay = 2.000 sec  
 NA = 251  
 P1 = 32768  
 F1 = 75.476807 MHz  
 F2 = 1.000000 MHz

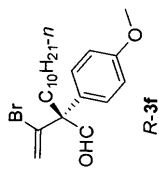

gbi-8-175-c

OJ-H, n-Hexane:i-PrOH = 80/20, 1.2 mL/min, 230 nm

```

=====
Injection Date : 12/17/2012 12:18:18 AM
Sample Name    : gbj-8-175
Acq. Operator  : gbj
Method         : D:\HPCHEM\1\METHODS\XFX LC.M
Last changed   : 12/17/2012 12:02:59 AM By zyy
                  (modified after loading)
Location       : -
    
```

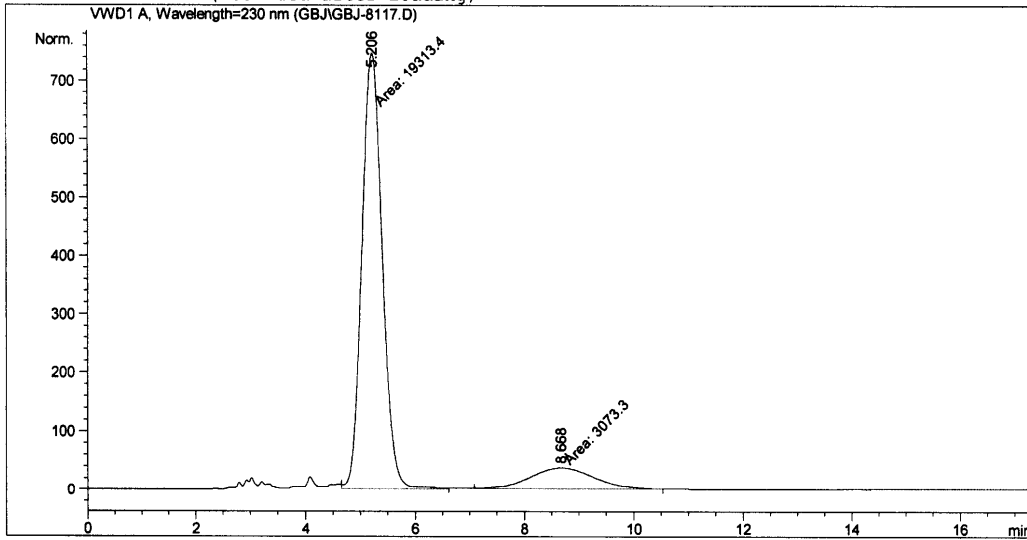

Area Percent Report

```

=====
Sorted By      : Signal
Multiplier     : 1.0000
Dilution       : 1.0000
Use Multiplier & Dilution Factor with ISTDs
    
```

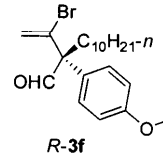

Signal 1: VWD1 A, Wavelength=230 nm

| Peak # | RetTime [min] | Type | Width [min] | Area mAU   | Area *s   | Height [mAU] | Area % |
|--------|---------------|------|-------------|------------|-----------|--------------|--------|
| 1      | 5.206         | MM   | 0.4307      | 1.93134e4  | 747.31372 | 86.2718      |        |
| 2      | 8.668         | MM   | 1.3875      | 3073.29663 | 36.91563  | 13.7282      |        |

Totals : 2.23867e4 784.22935

Results obtained with enhanced integrator!

\*\*\* End of Report \*\*\*

File D:\HPCHEM\1\DATA\GBJ\GBJ-8118.D

Sample Name: gbj-8-1

OJ-H, n-Hexane:i-PrOH = 80/20, 1.2 mL/min, 230 nm

=====  
Injection Date : 12/17/2012 12:38:18 AM  
Sample Name : gbj-8-174 Location : -  
Acq. Operator : gbj  
Method : D:\HPCHEM\1\METHODS\XFX\_LC.M  
Last changed : 12/17/2012 12:02:59 AM by zyy  
(modified after loading)

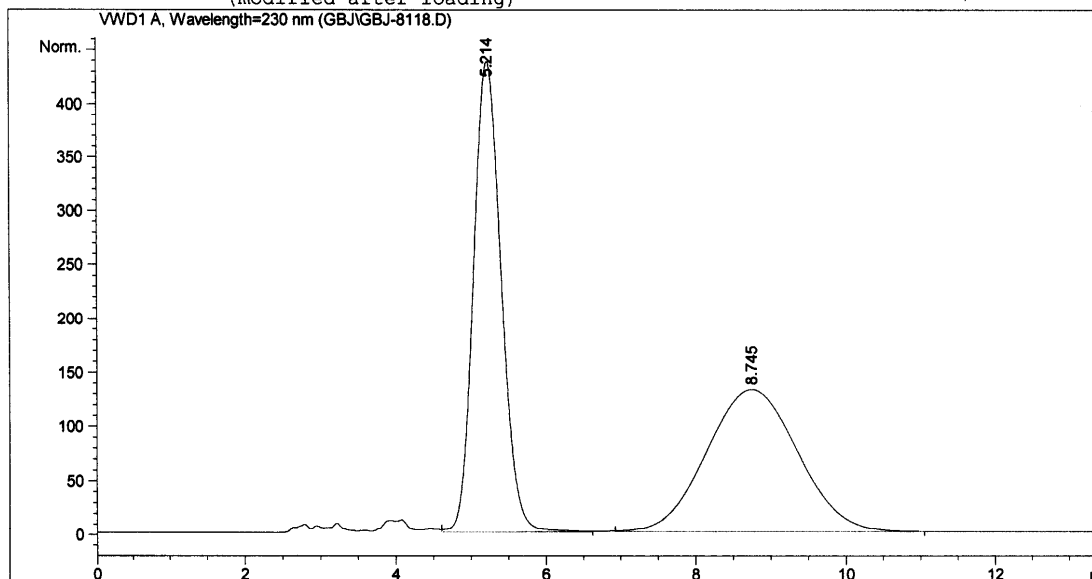

=====  
Area Percent Report  
=====

Sorted By : Signal  
Multiplier : 1.0000  
Dilution : 1.0000  
Use Multiplier & Dilution Factor with ISTDs

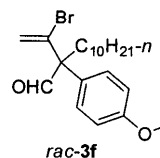

Signal 1: VWD1 A, Wavelength=230 nm

| Peak # | RetTime [min] | Type | Width [min] | Area mAU *s | Height [mAU] | Area %  |
|--------|---------------|------|-------------|-------------|--------------|---------|
| 1      | 5.214         | VB   | 0.4028      | 1.12661e4   | 436.91611    | 50.1087 |
| 2      | 8.745         | BB   | 1.3375      | 1.12173e4   | 131.67439    | 49.8913 |

Totals : 2.24834e4 568.59050

Results obtained with enhanced integrator!

=====  
\*\*\* End of Report \*\*\*

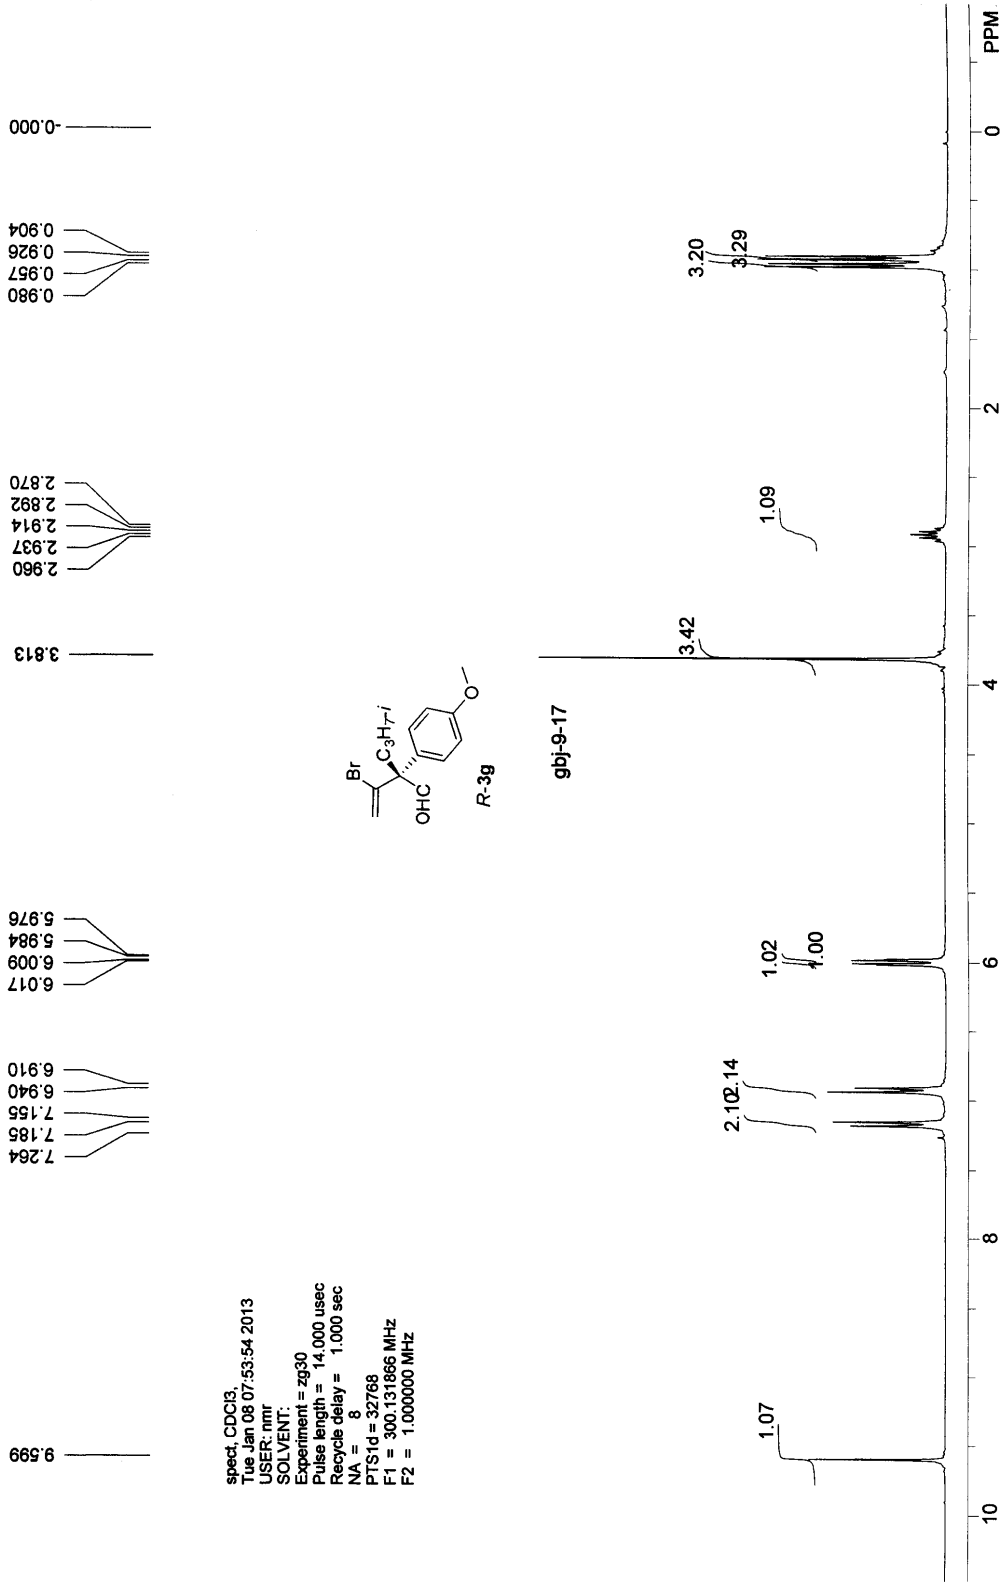



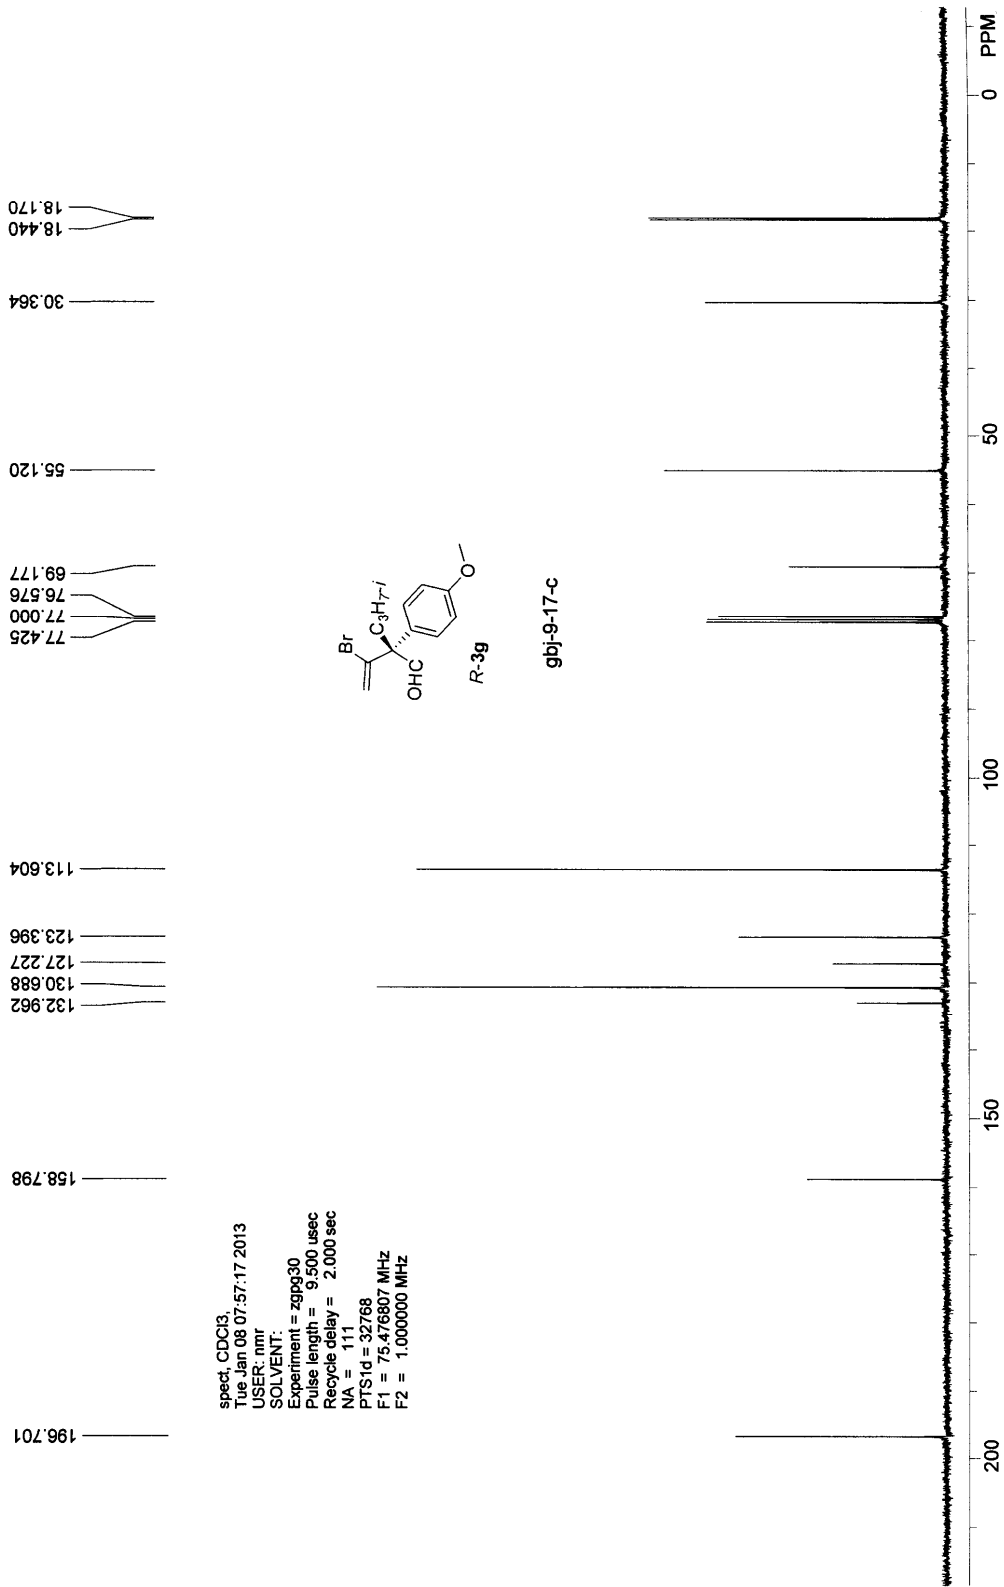

据文件 D:\Chem32\1\DATA\GBJ\GBJ-9000017.D  
 品名: gbj-9-17

OJ-H; Hexane/iPrOH=80/20; 1.2 ml/min, 230nm

=====  
 进样日期 : 2013-1-9 16:46:47  
 样品名称 : gbj-9-17 位置 : 样品瓶1  
 操作者 : gbj  
 仪器 : 仪器 1  
 方法 : D:\CHEM32\1\METHODS\ZYY\_LC.M  
 最后修改 : 2013-1-9 15:54:18 : gbj  
 (调用后修改)

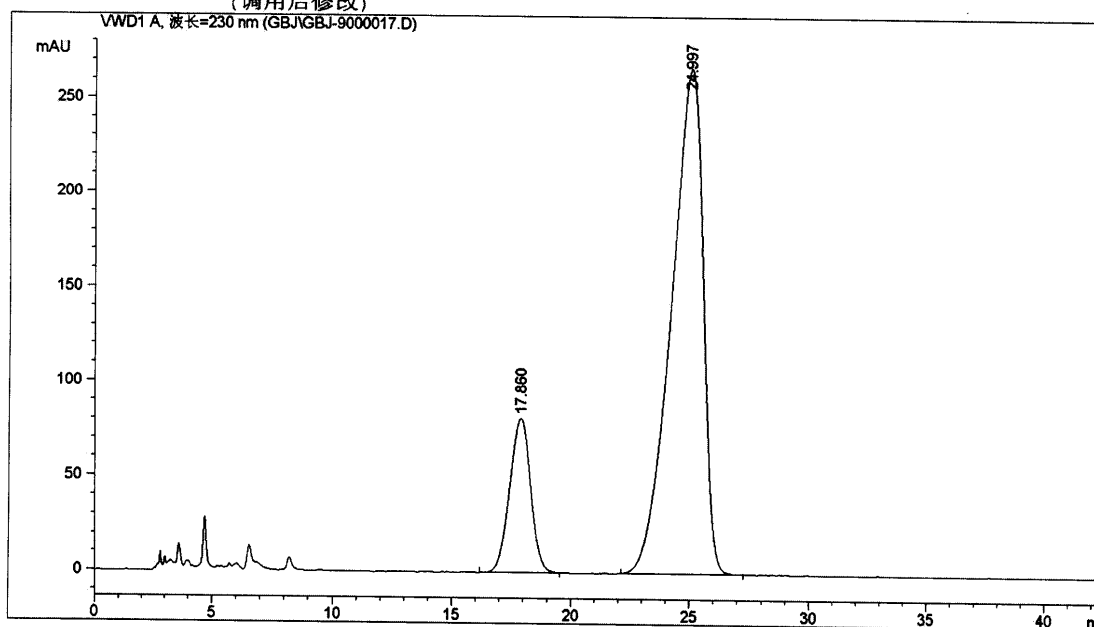

=====  
 面积百分比报告  
 =====

排序 : 信号  
 乘积因子 : 1.0000  
 稀释因子 : 1.0000  
 内标使用乘积因子和稀释因子

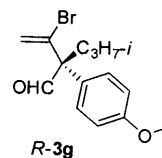

信号 1: VWD1 A, 波长=230 nm

| 峰 # | 保留时间 [min] | 类型 | 峰宽 [min] | 峰面积 mAU * s | 峰高 [mAU]  | 峰面积 %   |
|-----|------------|----|----------|-------------|-----------|---------|
| 1   | 17.860     | BB | 0.9649   | 4987.16650  | 81.11022  | 16.8176 |
| 2   | 24.997     | BV | 1.3828   | 2.46672e4   | 266.83478 | 83.1824 |

总量 : 2.96544e4 347.94500

=====  
 \*\*\* 报告结束 \*\*\*

居文件 D:\Chem32\1\DATA\GBJ\GBJ-9000016.D  
 品名: gbj-9-16

OJ-H; Hexane/iPrOH=80/20; 1.2 ml/min, 230nm

=====  
 进样日期 : 2013-1-9 16:10:46  
 样品名称 : gbj-9-16 位置 : 样品瓶1  
 操作者 : gbj  
 仪器 : 仪器 1  
 方法 : D:\CHEM32\1\METHODS\ZYY\_LC.M  
 最后修改 : 2013-1-9 15:54:18 : gbj  
 (调用后修改)

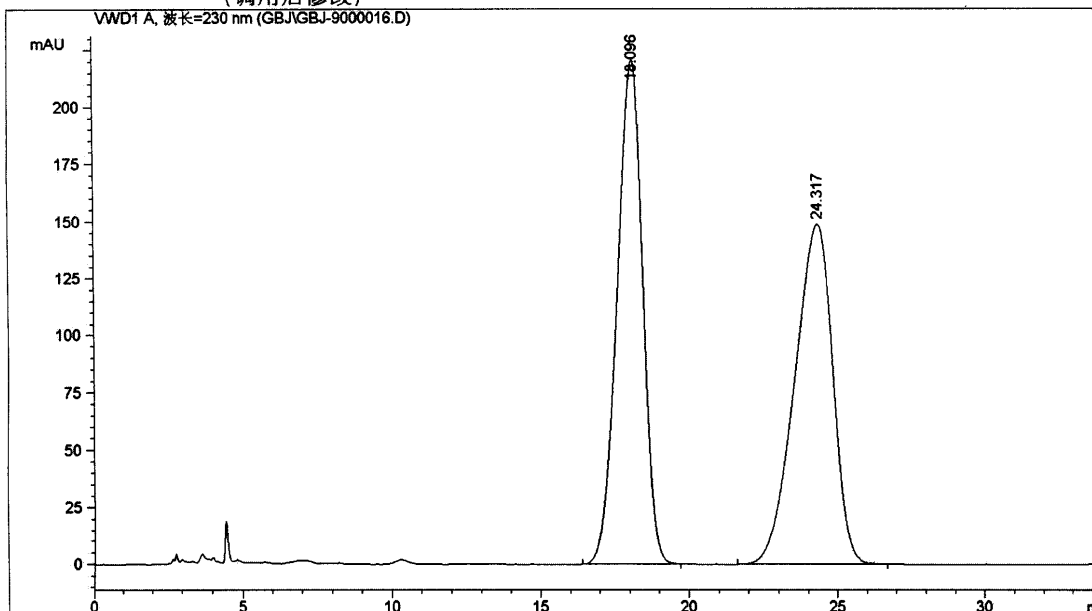

=====  
 面积百分比报告  
 =====

排序 : 信号  
 乘积因子 : 1.0000  
 稀释因子 : 1.0000  
 内标使用乘积因子和稀释因子

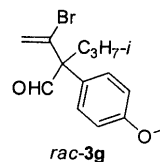

信号 1: VWD1 A, 波长=230 nm

| 峰 # | 保留时间 [min] | 类型 | 峰宽 [min] | 峰面积 mAU *s | 峰高 [mAU]  | 峰面积 %   |
|-----|------------|----|----------|------------|-----------|---------|
| 1   | 18.096     | BB | 0.9174   | 1.31869e4  | 220.54422 | 49.8509 |
| 2   | 24.317     | BB | 1.3449   | 1.32658e4  | 148.73380 | 50.1491 |

总量 : 2.64526e4 369.27802

=====  
 \*\*\* 报告结束 \*\*\*

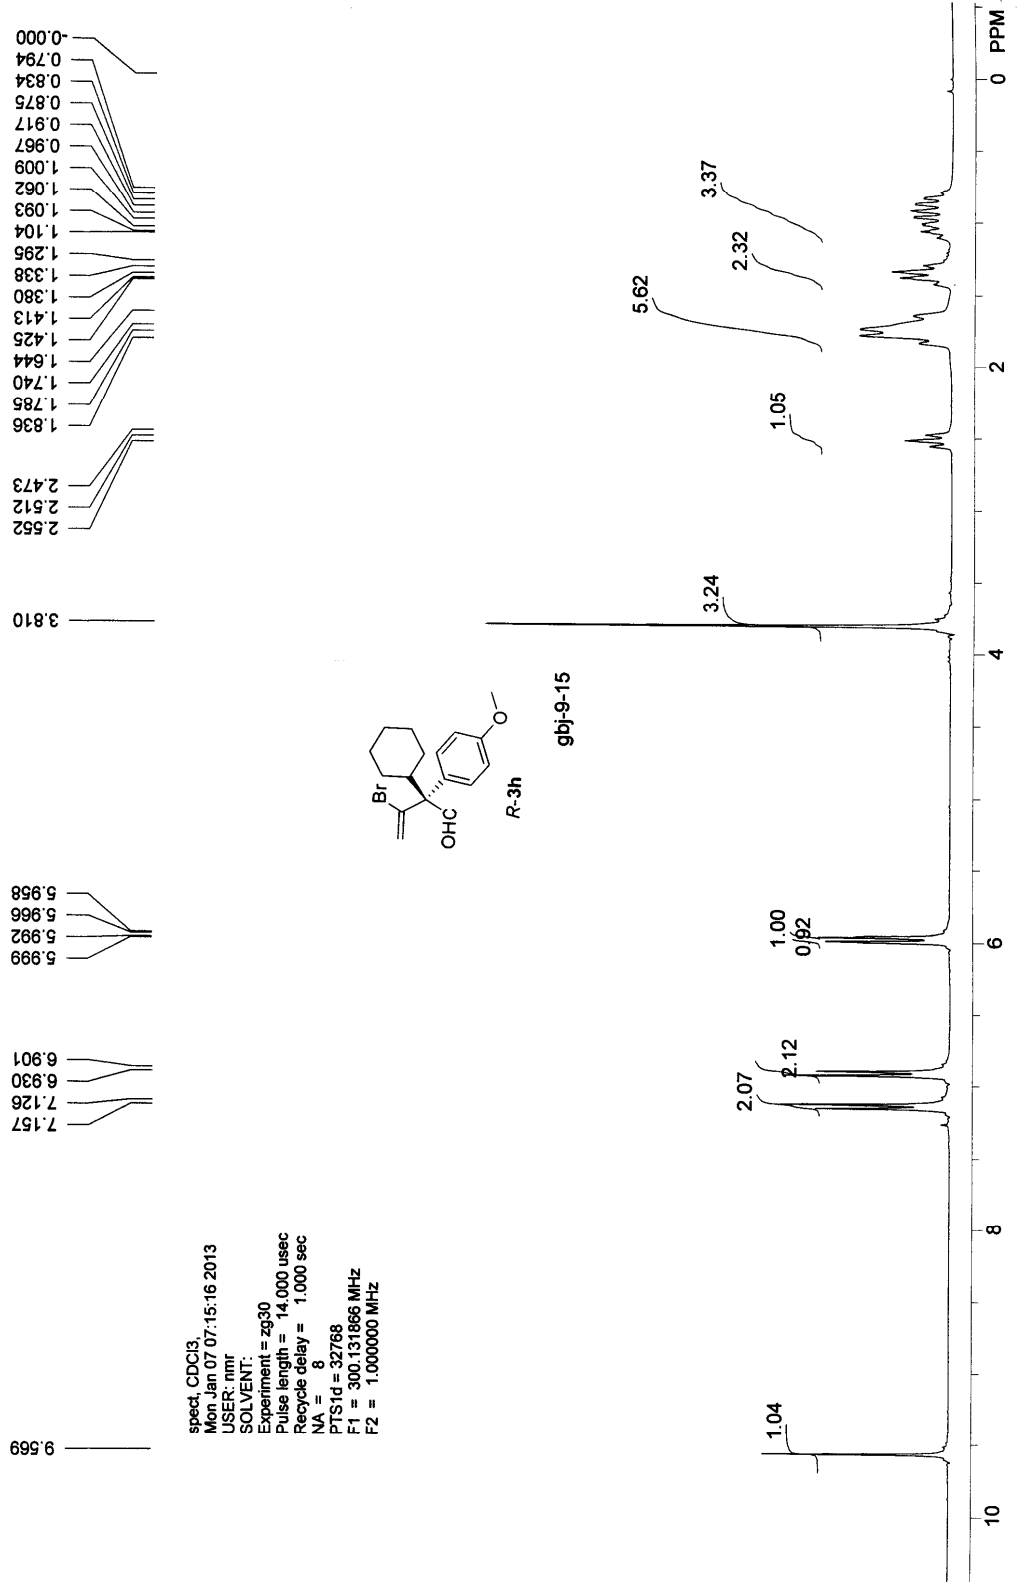

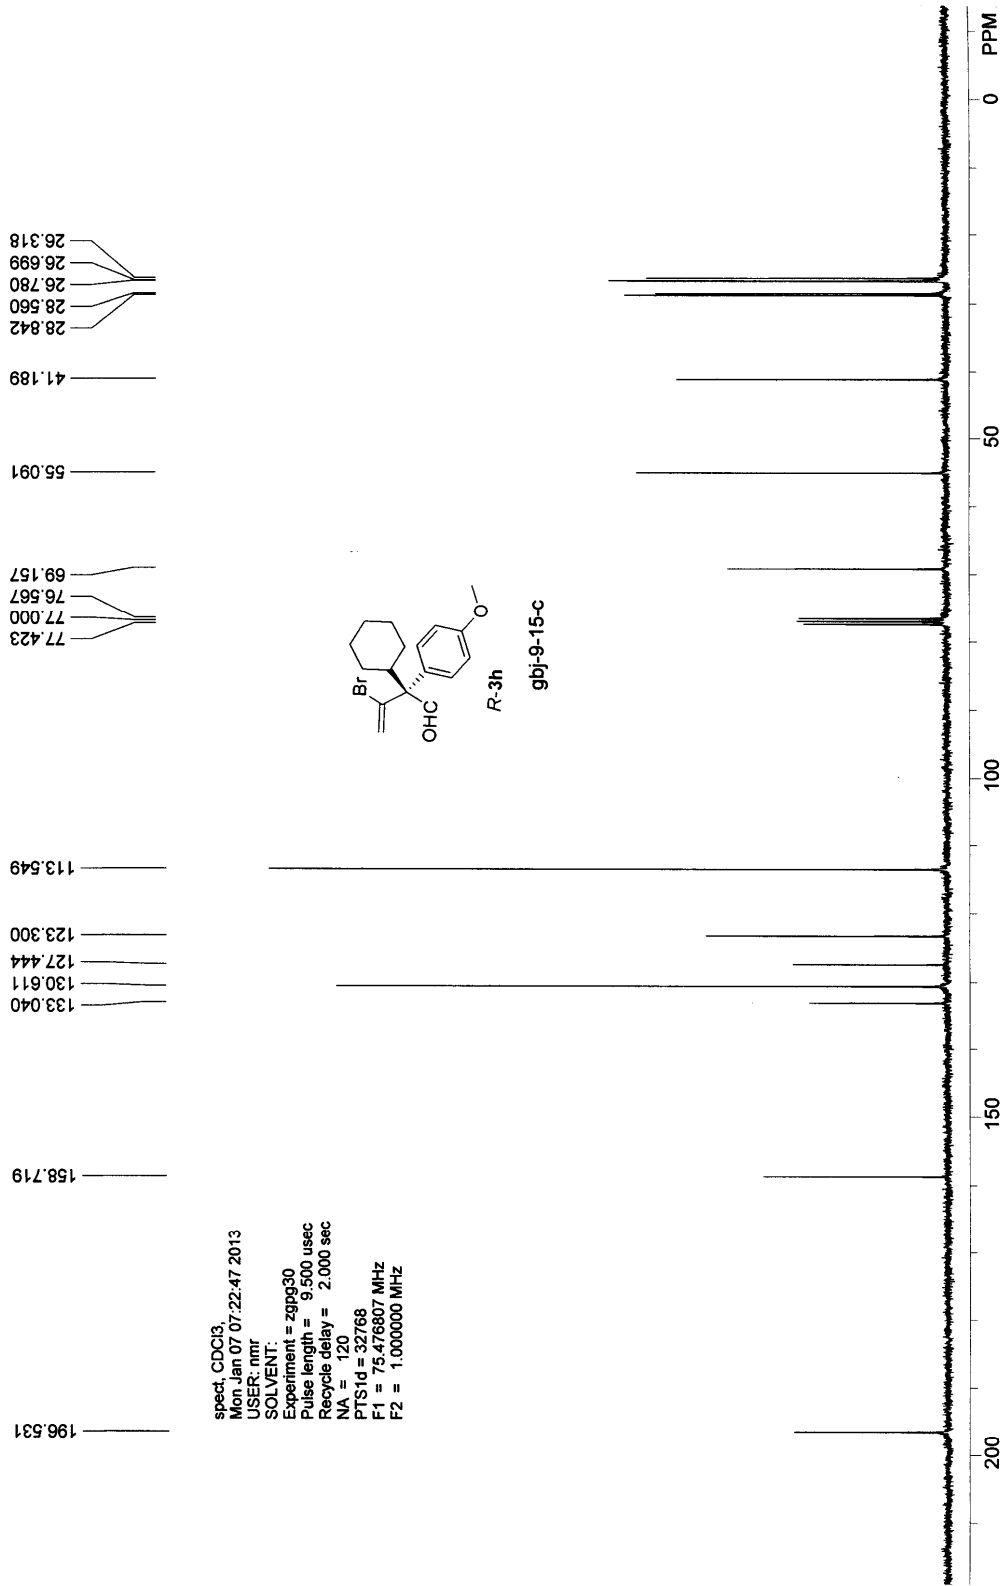

据文件 D:\Chem32\1\DATA\GBJ\GBJ-9000015.D  
品名: gbj-9-15

OJ-H; Hexane/iPrOH=95/5; 0.6 ml/min, 230nm

=====  
进样日期 : 2013-1-9 15:25:52  
样品名称 : gbj-9-15 位置 : 样品瓶1  
操作者 : gbj  
仪器 : 仪器 1  
采集方法 : D:\CHEM32\1\METHODS\ZYY\_LC.M  
最后修改 : 2013-1-9 14:55:27 : gbj  
(调用后修改)  
分析方法 : D:\CHEM32\1\METHODS\ZYY\_LC.M  
最后修改 : 2013-1-9 15:54:18 : gbj  
(调用后修改)  
=====

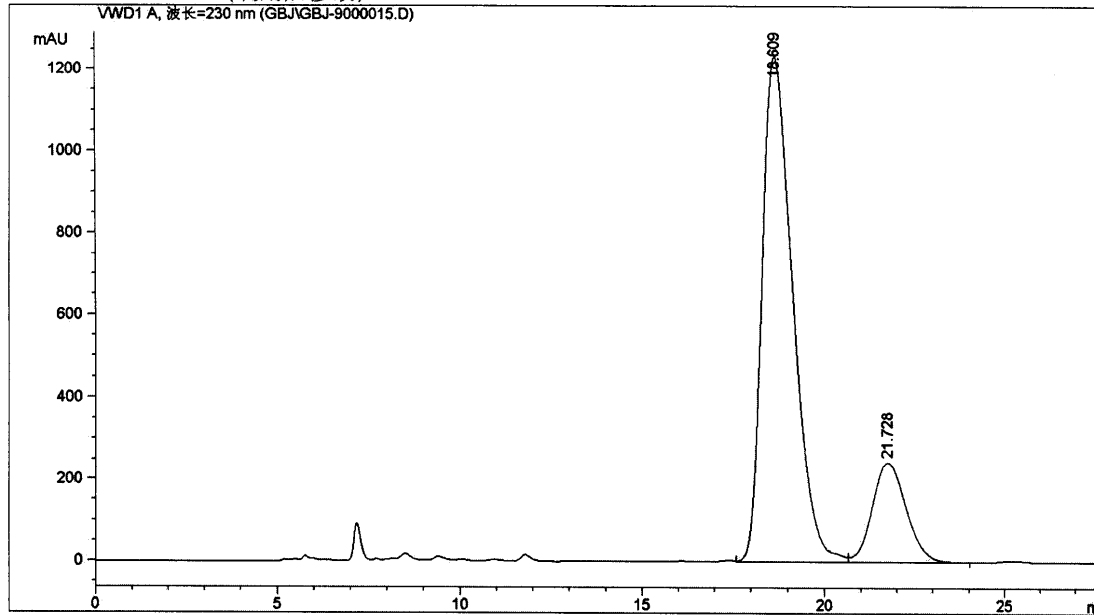

=====  
面积百分比报告  
=====

排序 : 信号  
乘积因子 : 1.0000  
稀释因子 : 1.0000  
内标使用乘积因子和稀释因子

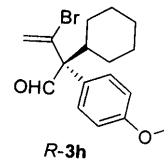

信号 1: VWD1 A, 波长=230 nm

| 峰 # | 保留时间 [min] | 类型 | 峰宽 [min] | 峰面积 mAU * s | 峰高 [mAU]   | 峰面积 %   |
|-----|------------|----|----------|-------------|------------|---------|
| 1   | 18.609     | VV | 0.9005   | 7.16974e4   | 1231.50586 | 81.8310 |
| 2   | 21.728     | VB | 1.0061   | 1.59190e4   | 244.34642  | 18.1690 |

总量 : 8.76164e4 1475.85228

=====  
\*\*\* 报告结束 \*\*\*  
=====

据文件 D:\Chem32\1\DATA\GBJ\GBJ-9000014.D  
品名: gbj-9-14

OJ-H; Hexane/iPrOH=95/5; 0.6 ml/min, 230nm

=====  
进样日期 : 2013-1-9 14:56:12  
样品名称 : gbj-9-14 位置 : 样品瓶1  
操作者 : gbj  
仪器 : 仪器 1  
方法 : D:\CHEM32\1\METHODS\ZYY\_LC.M  
最后修改 : 2013-1-9 14:55:27 : gbj  
(调用后修改)

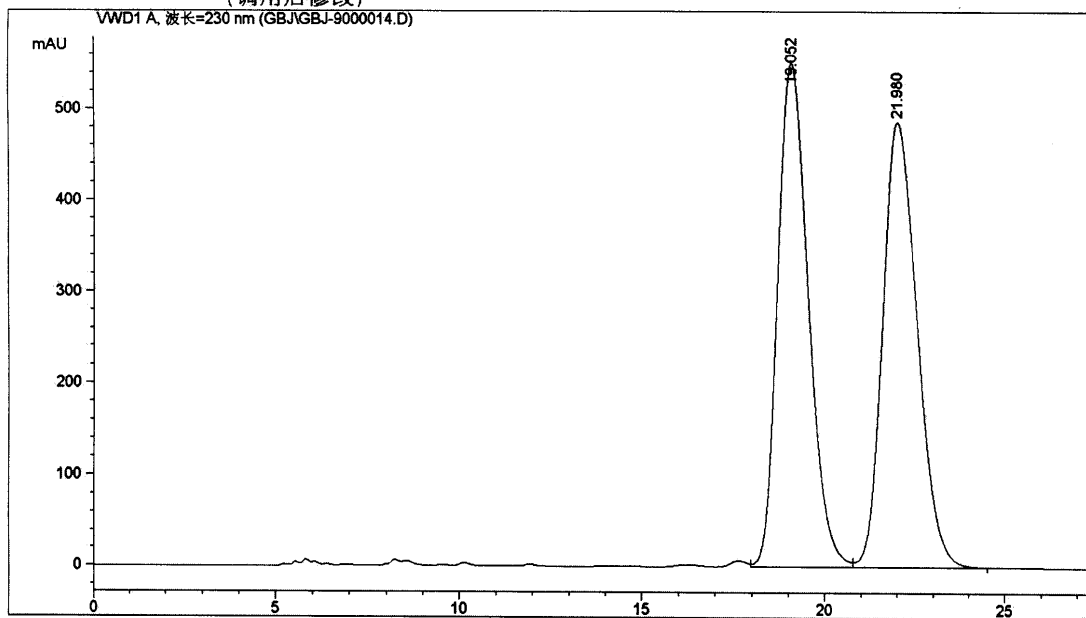

=====  
面积百分比报告  
=====

排序 : 信号  
乘积因子 : 1.0000  
稀释因子 : 1.0000  
内标使用乘积因子和稀释因子

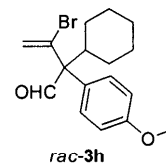

信号 1: VWD1 A, 波长=230 nm

| 峰 # | 保留时间 [min] | 类型 | 峰宽 [min] | 峰面积 mAU * s | 峰高 [mAU]  | 峰面积 %   |
|-----|------------|----|----------|-------------|-----------|---------|
| 1   | 19.052     | VV | 0.8955   | 3.20997e4   | 551.88623 | 49.9449 |
| 2   | 21.980     | VB | 1.0276   | 3.21706e4   | 486.57935 | 50.0551 |

总量 : 6.42703e4 1038.46558

=====  
\*\*\* 报告结束 \*\*\*  
=====

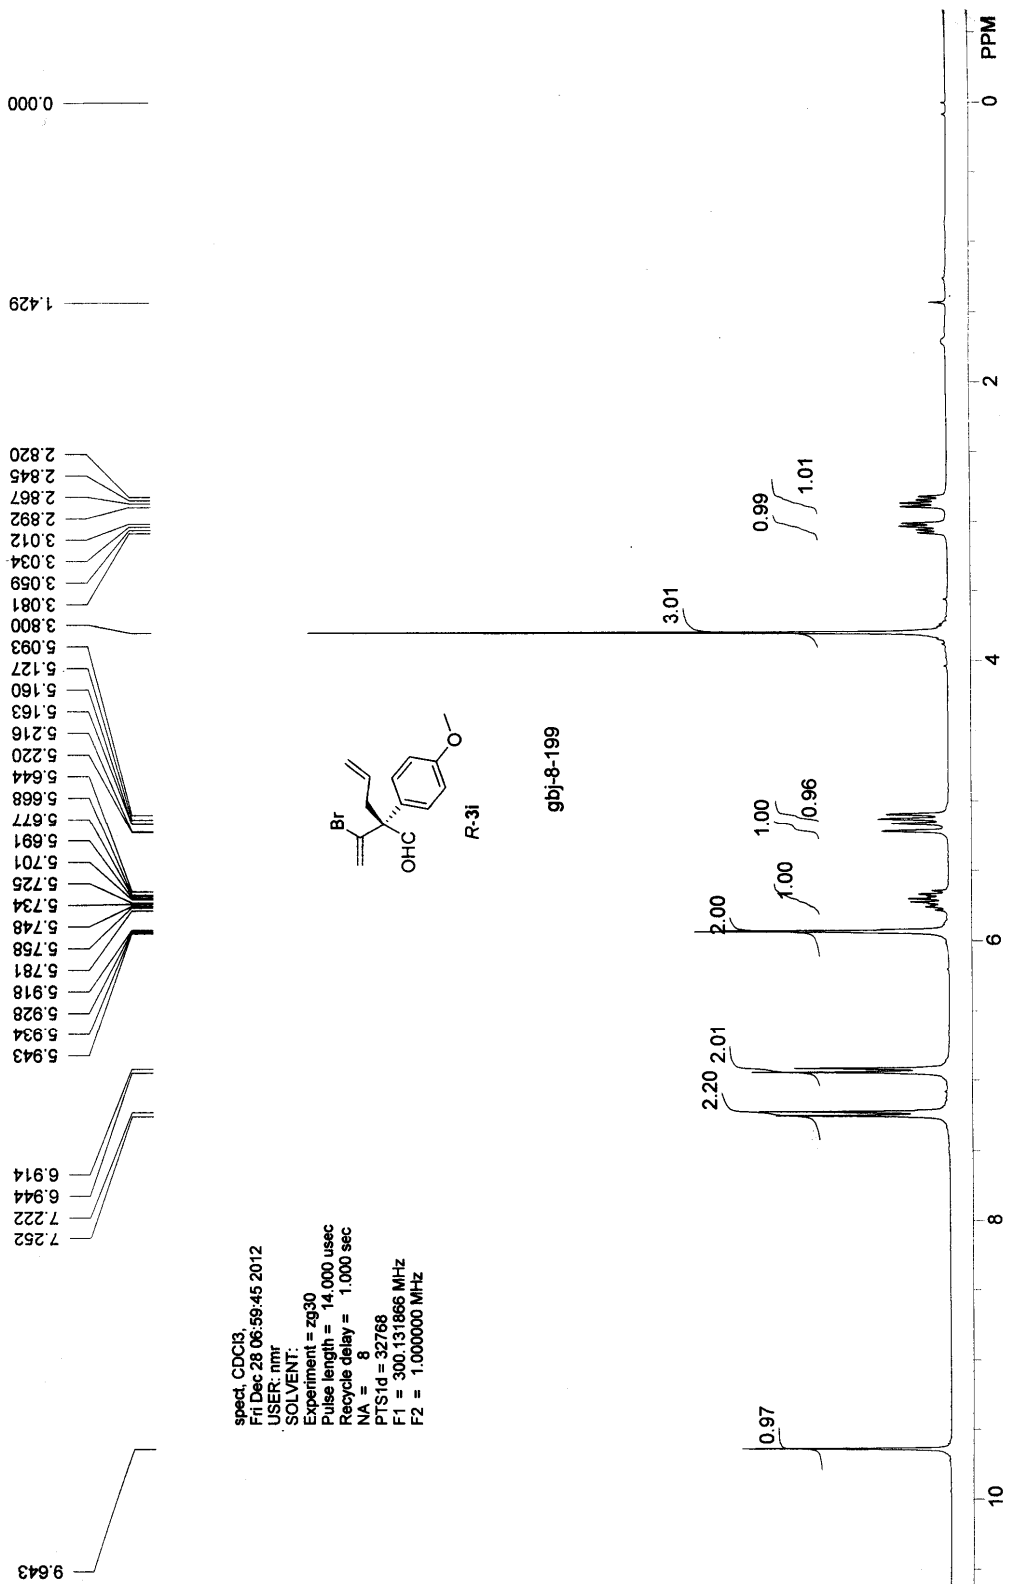

spect\_CDCl3  
 Fri Dec 28 06:59:45 2012  
 USER: nmr  
 SOLVENT:  
 Experiment = zg30  
 Pulse length = 14,000 usec  
 Recycle delay = 1,000 sec  
 NA = 8  
 P1 = 32768  
 F1 = 300,131,866 MHz  
 F2 = 1,000,000 MHz



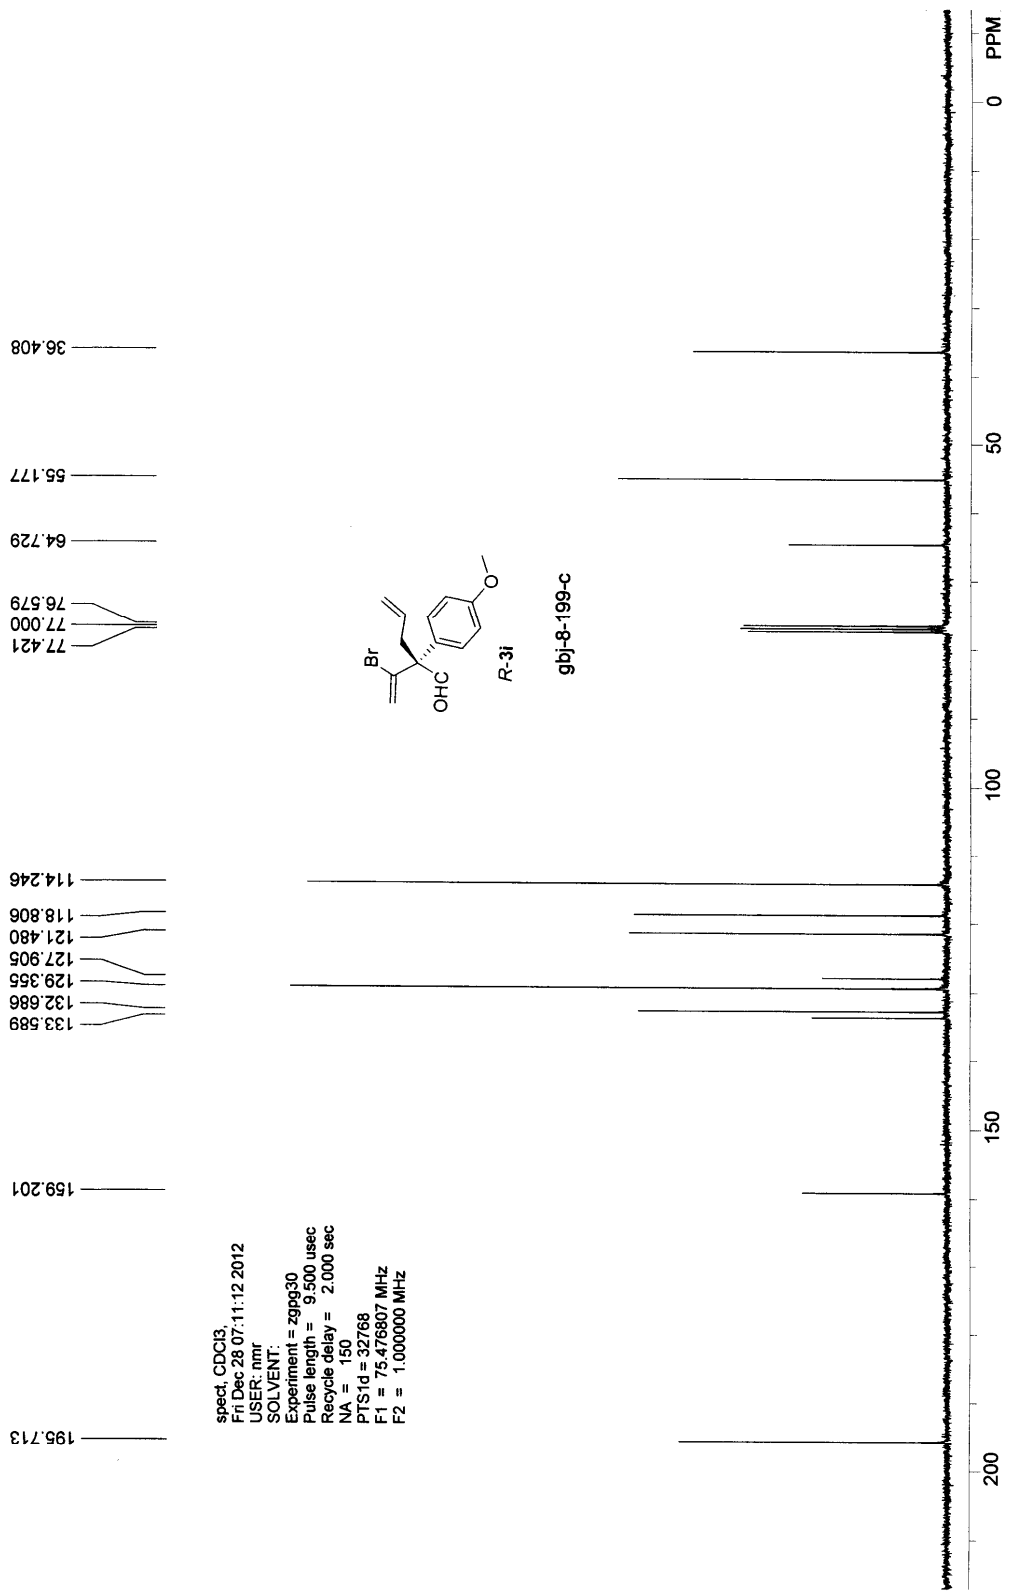

OJ-H, n-Hexane:i-PrOH=98/2, 1.2 mL/min, 230 nm

```

=====
Injection Date : 12/28/2012 9:10:16 PM      Location : -
Sample Name    : gbj-8-199
Acq. Operator  : gbj
Method         : D:\HPCHEM\1\METHODS\XFX_LC.M
Last changed   : 12/28/2012 8:00:12 PM by gbj
                  (modified after loading)
=====
    
```

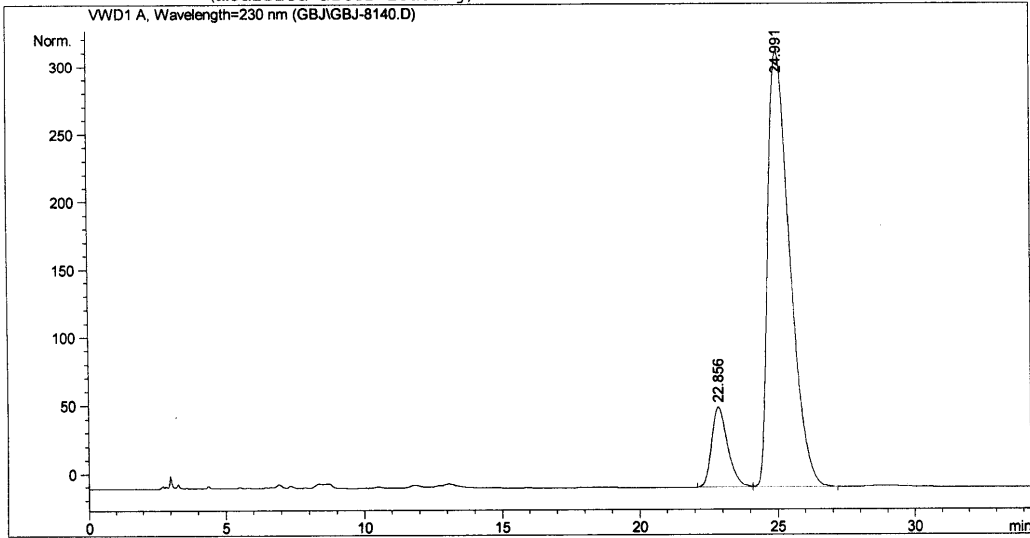

Area Percent Report

```

=====
Sorted By      : Signal
Multiplier     : 1.0000
Dilution       : 1.0000
Use Multiplier & Dilution Factor with ISTDs
    
```

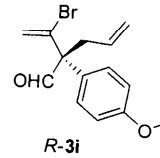

Signal 1: VWD1 A, Wavelength=230 nm

| Peak # | RetTime [min] | Type | Width [min] | Area mAU *s | Height [mAU] | Area %  |
|--------|---------------|------|-------------|-------------|--------------|---------|
| 1      | 22.856        | BV   | 0.6228      | 2431.37769  | 59.08436     | 12.0708 |
| 2      | 24.991        | VB   | 0.8526      | 1.77112e4   | 321.40039    | 87.9292 |

Totals : 2.01426e4 380.48475

Results obtained with enhanced integrator!

\*\*\* End of Report \*\*\*

OJ-H, n-Hexane:i-PrOH=98/2, 1.2 mL/min, 230 nm

```

=====
Injection Date : 12/28/2012 8:36:39 PM
Sample Name    : gbj-8-198
Acq. Operator  : gbj
Method         : D:\HPCHEM\1\METHODS\XFX_LC.M
Last changed   : 12/28/2012 8:00:12 PM by gbj
                  (modified after loading)
Location       : -
    
```

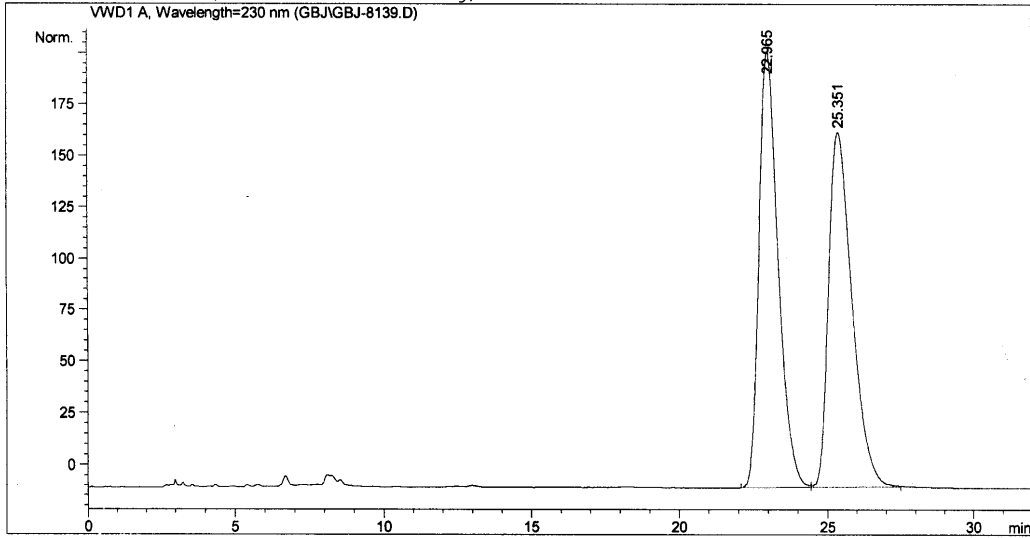

=====  
 Area Percent Report  
 =====

```

Sorted By      : Signal
Multiplier     : 1.0000
Dilution       : 1.0000
Use Multiplier & Dilution Factor with ISTDs
    
```

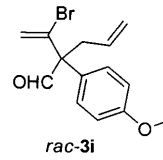

Signal 1: VWD1 A, Wavelength=230 nm

| Peak # | RetTime [min] | Type | Width [min] | Area mAU   | Area *s   | Height [mAU] | Area % |
|--------|---------------|------|-------------|------------|-----------|--------------|--------|
| 1      | 22.965        | BV   | 0.6883      | 9544.05078 | 212.00467 | 50.0101      |        |
| 2      | 25.351        | VB   | 0.8402      | 9540.18652 | 172.53101 | 49.9899      |        |

Totals : 1.90842e4 384.53568

Results obtained with enhanced integrator!

=====  
 \*\*\* End of Report \*\*\*

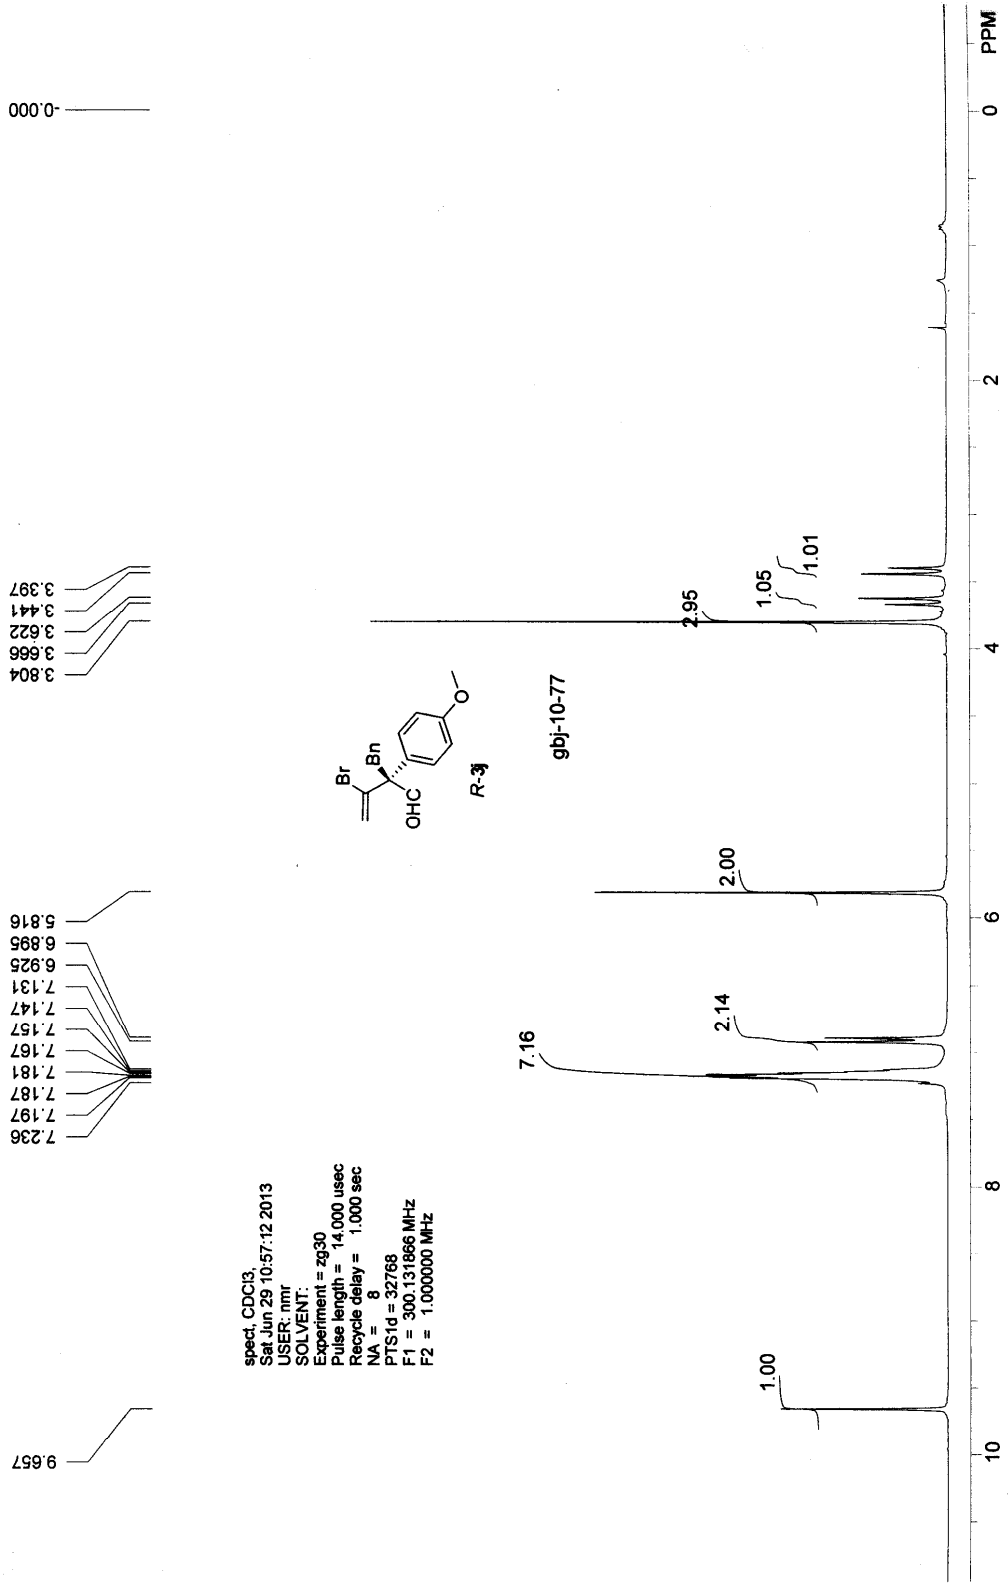

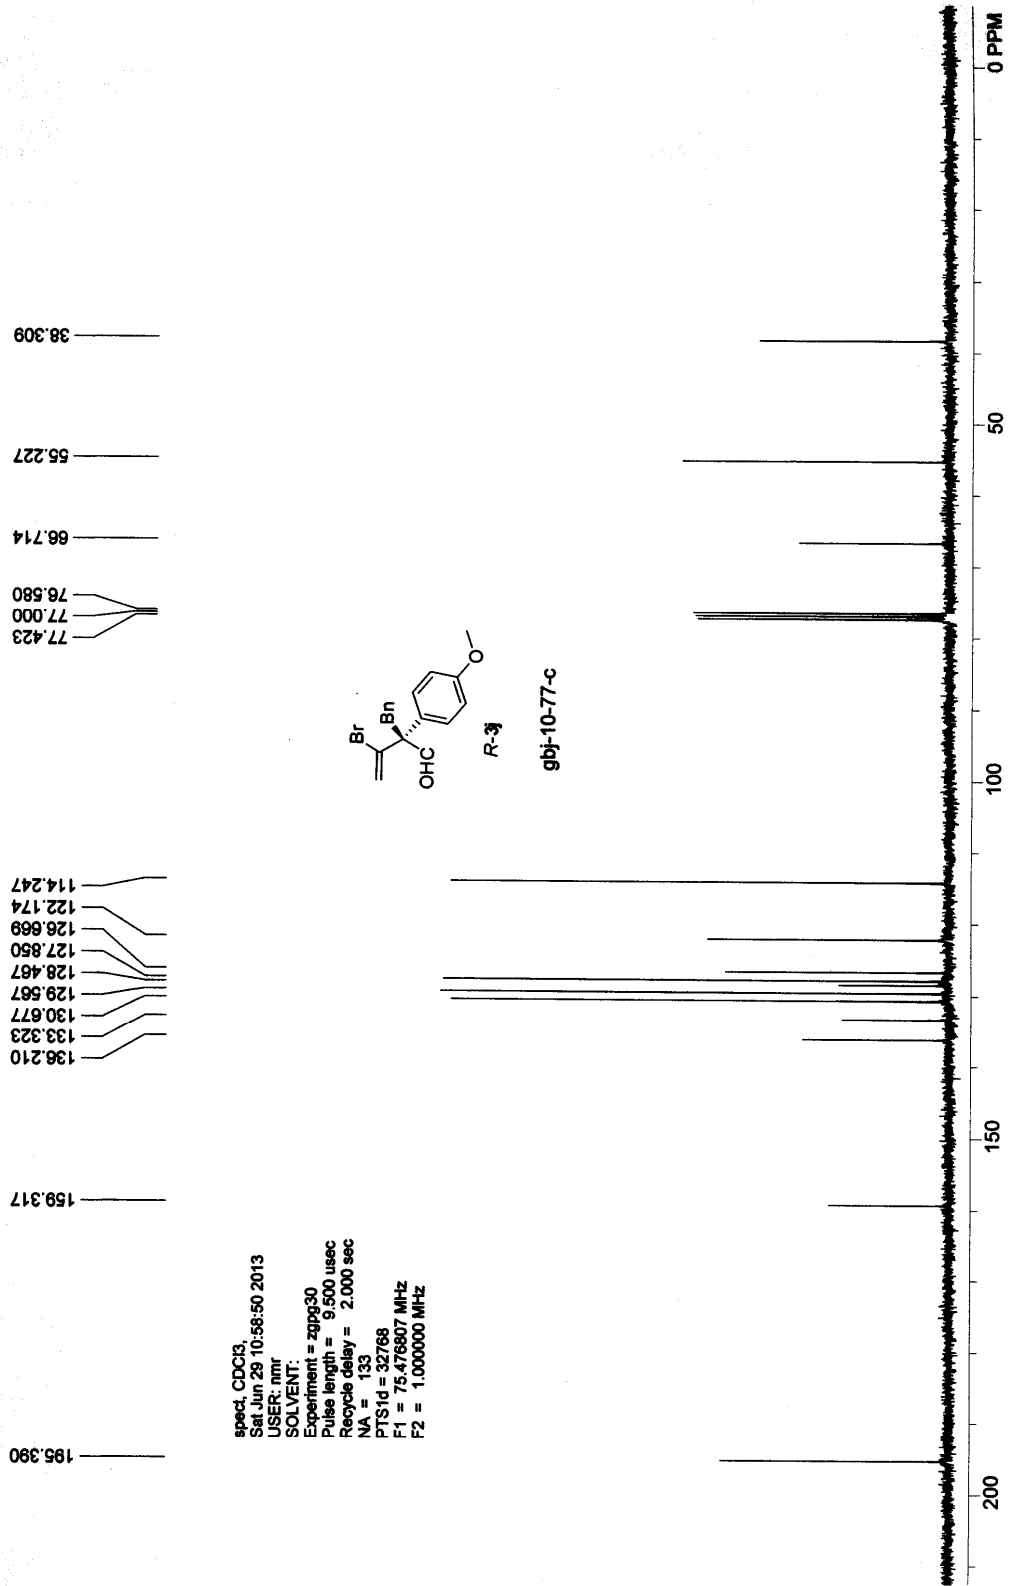

spec1\_CDCl3  
 Sat Jun 29 10:56:50 2013  
 USER: nmr  
 SOLVENT:  
 Experiment = zgpg30  
 Pulse length = 9.500 usec  
 Recycle delay = 2.000 sec  
 NA = 133  
 P1S1d = 32768  
 F1 = 75.476807 MHz  
 F2 = 1.000000 MHz

## gbj-10-77

实验时间: 2014-01-23, 19:24:56  
谱图文件: D:\浙大智达\N2000\样品\B0050.org

实验者: gbj  
报告时间: 2014-01-23, 19:42:41  
积分方法: 面积归一法

实验内容简介:  
AD-H, n-hexane/iPrOH = 80/20, 230 nm, 0.50 ml/min

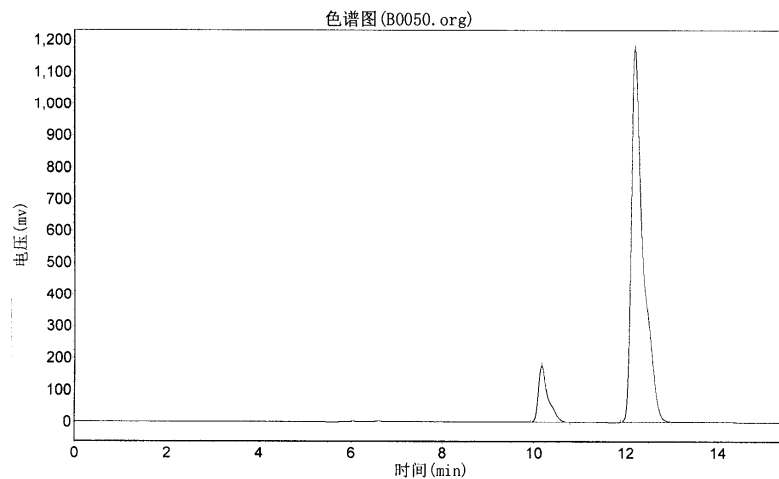

分析结果表

| 峰号 | 峰名 | 保留时间   | 峰高          | 峰面积          | 含量       |
|----|----|--------|-------------|--------------|----------|
| 1  |    | 10.180 | 175589.984  | 2535402.500  | 10.9289  |
| 2  |    | 12.223 | 1172402.375 | 20663656.000 | 89.0711  |
| 总计 |    |        | 1347992.359 | 23199058.500 | 100.0000 |

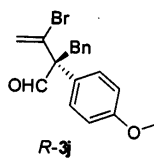

2014-01-23

## gbj-10-78

实验时间: 2014-01-23, 19:44:14  
谱图文件: D:\浙大智达\N2000\样品\B0051.org

实验者: gbj  
报告时间: 2014-01-23, 20:09:02  
积分方法: 面积归一法

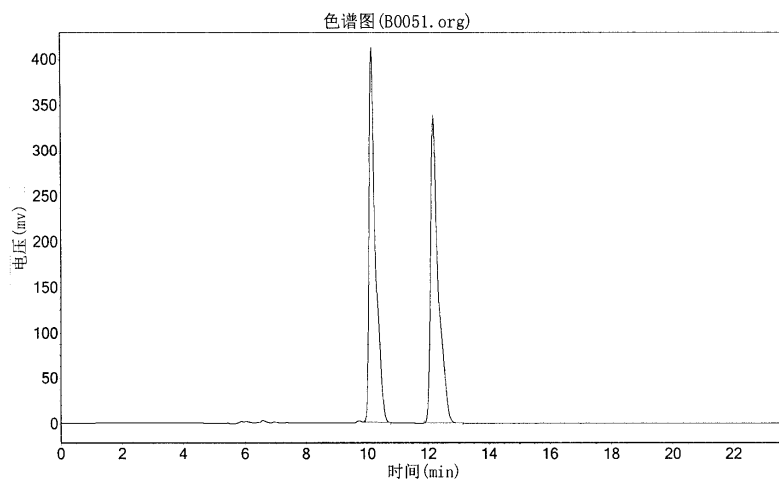

分析结果表

| 峰号 | 峰名 | 保留时间   | 峰高         | 峰面积          | 含量       |
|----|----|--------|------------|--------------|----------|
| 1  |    | 10.155 | 407719.344 | 5895146.000  | 50.0400  |
| 2  |    | 12.188 | 335074.781 | 5885728.500  | 49.9600  |
| 总计 |    |        | 742794.125 | 11780874.500 | 100.0000 |

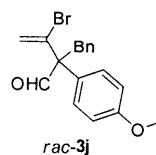

2014-01-23

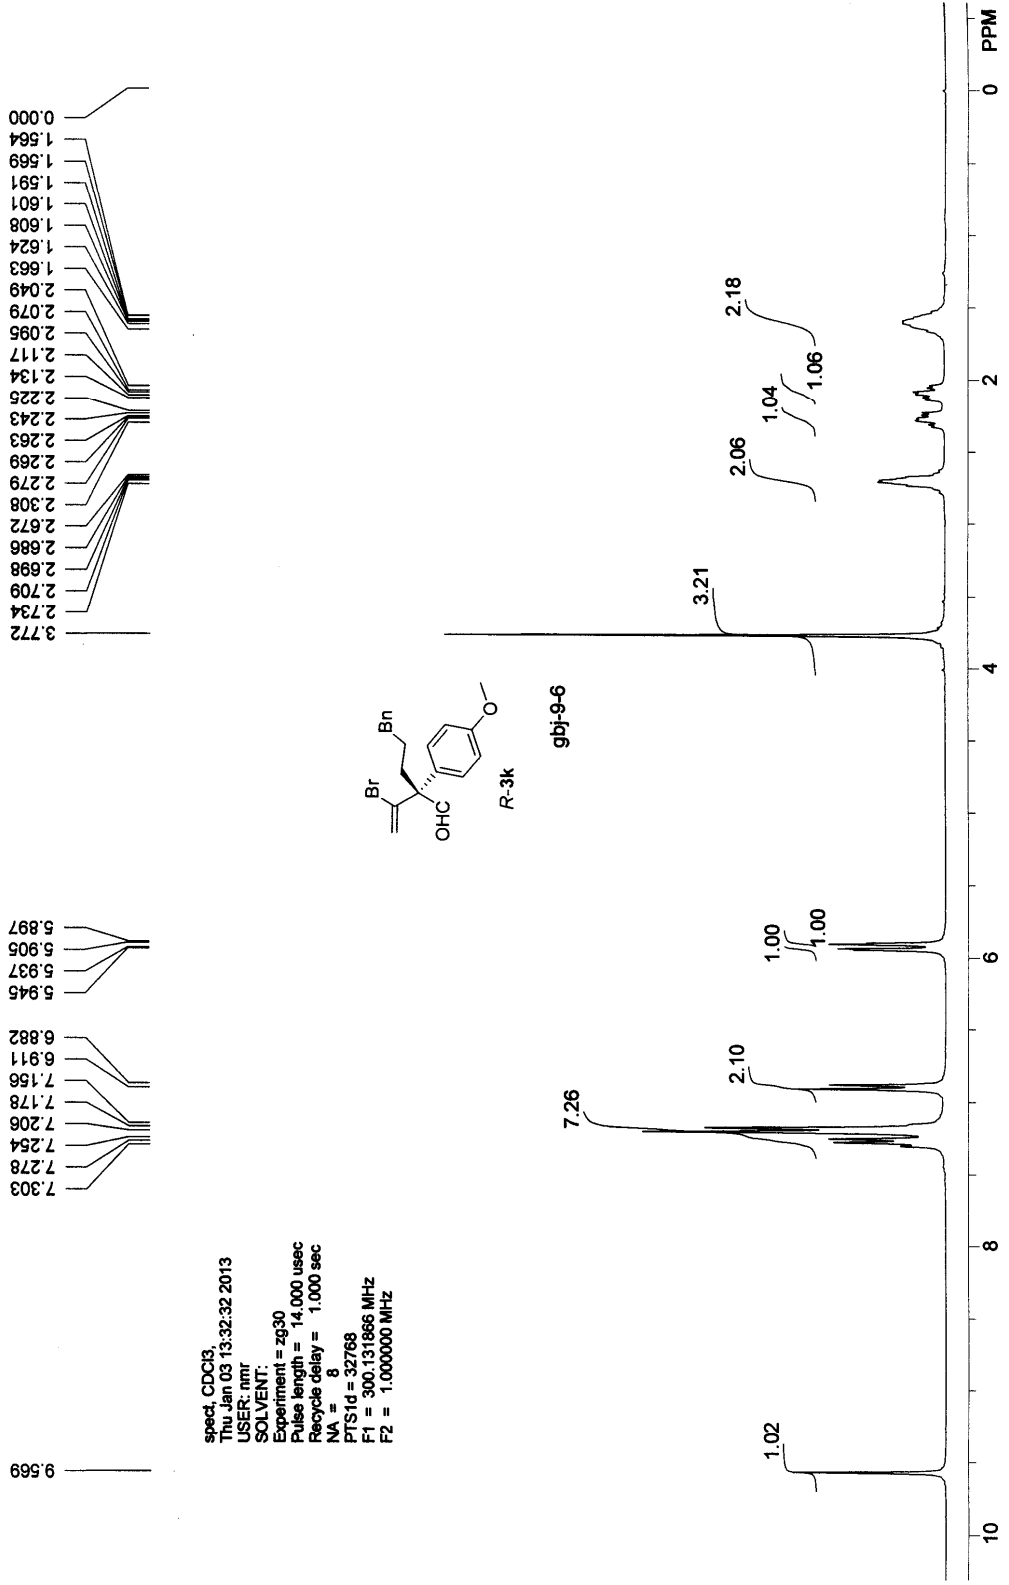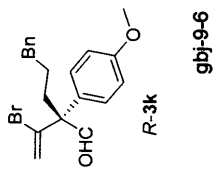

spect, CDCl3,  
 Thu Jan 03 13:32:32 2013  
 USER: nmr  
 SOLVENT:  
 Experiment = zg30  
 Pulse length = 14.000 usec  
 Recycle delay = 1.000 sec  
 NA = 8  
 P1 = 32768  
 F1 = 300.131866 MHz  
 F2 = 1.000000 MHz

3.772  
 2.734  
 2.709  
 2.698  
 2.686  
 2.672  
 2.308  
 2.279  
 2.269  
 2.263  
 2.243  
 2.225  
 2.134  
 2.117  
 2.095  
 2.079  
 2.049  
 1.624  
 1.608  
 1.601  
 1.591  
 1.569  
 1.564  
 0.000

7.303  
 7.278  
 7.254  
 7.206  
 7.178  
 7.156  
 6.911  
 6.882  
 5.945  
 5.937  
 5.905  
 5.897

9.569



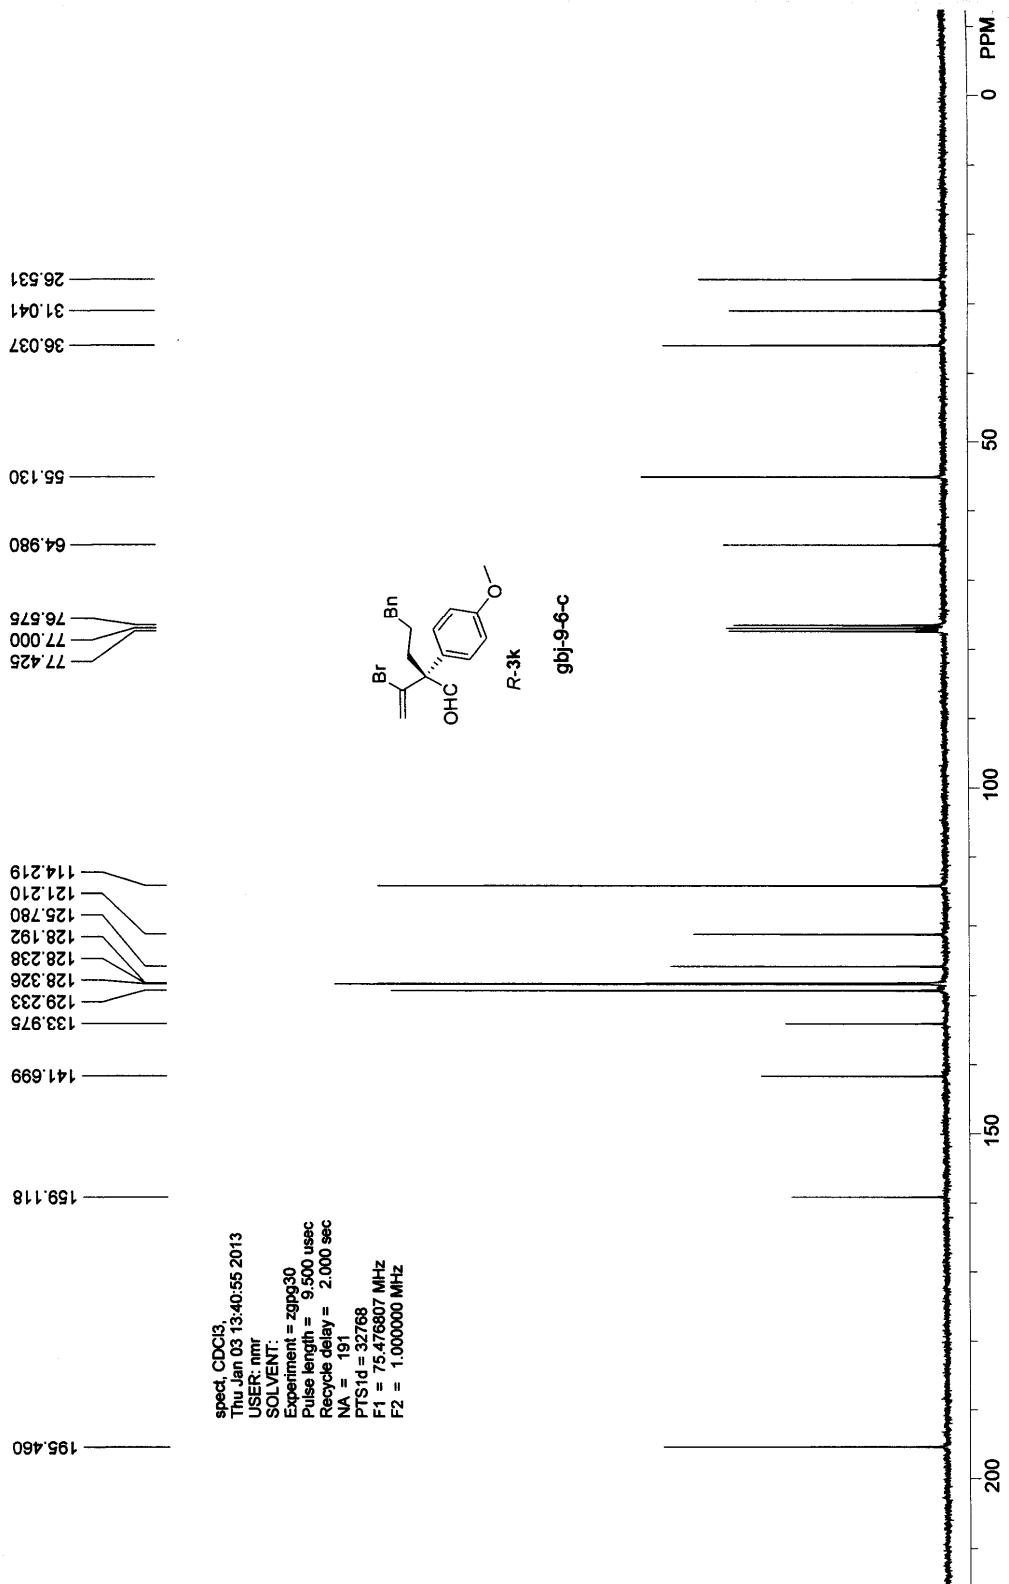

spect. CDCl3,  
 Thu Jan 03 13:40:56 2013  
 USER: nmr  
 SOLVENT:  
 Experiment = zgpg30  
 Pulse length = 9.500 usec  
 Recycle delay = 2.000 sec  
 NA = 191  
 PTS1d = 32768  
 F1 = 75.476807 MHz  
 F2 = 1.000000 MHz

据文件 D:\Chem32\1\DATA\GBJ\GBJ-9000002.D  
 品名: gbj-9-6

OJ-H; Hexane/iPrOH=80/20; 1.2 ml/min, 230nm

-----  
 进样日期 : 2013-1-8 10:49:37  
 样品名称 : gbj-9-6 重量 : 样品瓶1  
 操作者 : gbj  
 仪器 : 仪器 1  
 方法 : D:\Chem32\1\METHODS\DEF\_LC.M  
 最后修改 : 2013-1-8 10:56:20 : gbj  
 (调用后修改)

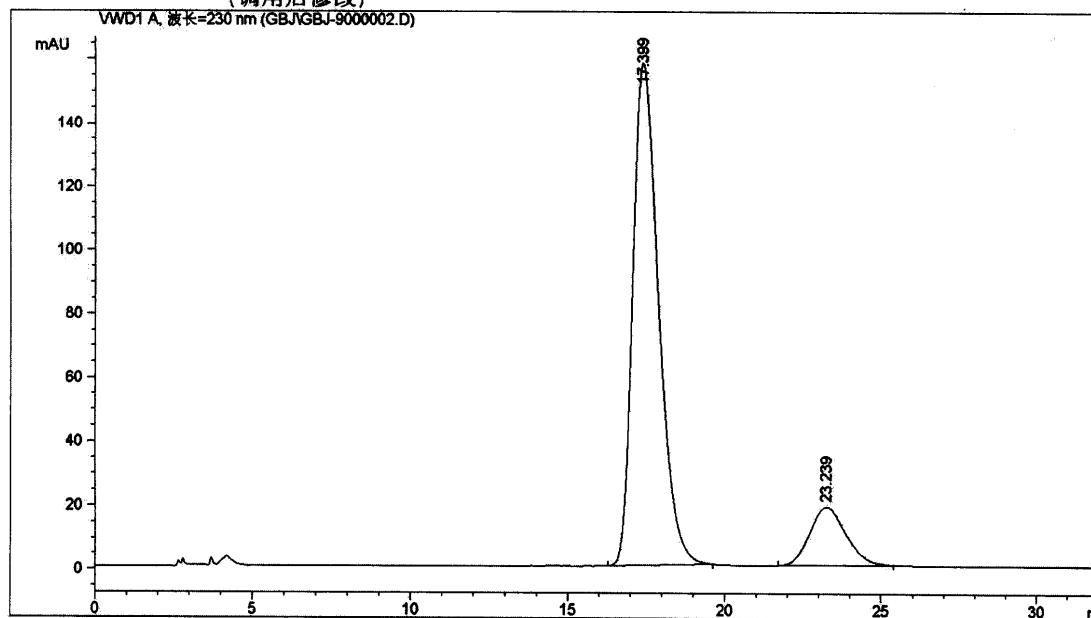

-----  
 面积百分比报告  
 -----

排序 : 信号  
 乘积因子 : 1.0000  
 稀释因子 : 1.0000  
 内标使用乘积因子和稀释因子

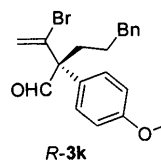

信号 1: VWD1 A, 波长=230 nm

| 峰 # | 保留时间 [min] | 类型 | 峰宽 [min] | 峰面积 mAU    | 峰高 [mAU]  | 峰面积 %   |
|-----|------------|----|----------|------------|-----------|---------|
| 1   | 17.399     | BB | 0.8770   | 8966.60059 | 157.45175 | 85.7440 |
| 2   | 23.239     | BB | 1.0974   | 1490.81042 | 18.35784  | 14.2560 |

总量 : 1.04574e4 175.80960

-----  
 \*\*\* 报告结束 \*\*\*  
 -----

据文件 D:\CHEM32\1\DATA\GBJ\GBJ-9000001.D  
品名: gbj-9-1

OJ-H; Hexane/iPrOH=80/15; 1.2 ml/min, 230nm

=====  
进样日期 : 2013-1-8 10:17:12  
样品名称 : gbj-9-1 位置 : 样品瓶1  
操作者 : gbj  
仪器 : 仪器 1  
采集方法 : D:\Chem32\1\METHODS\DEF\_LC.M  
最后修改 : 2013-1-8 10:09:09 : lqk  
(调用后修改)  
分析方法 : D:\Chem32\1\METHODS\DEF\_LC.M  
最后修改 : 2013-1-8 10:56:20 : gbj  
(调用后修改)  
=====

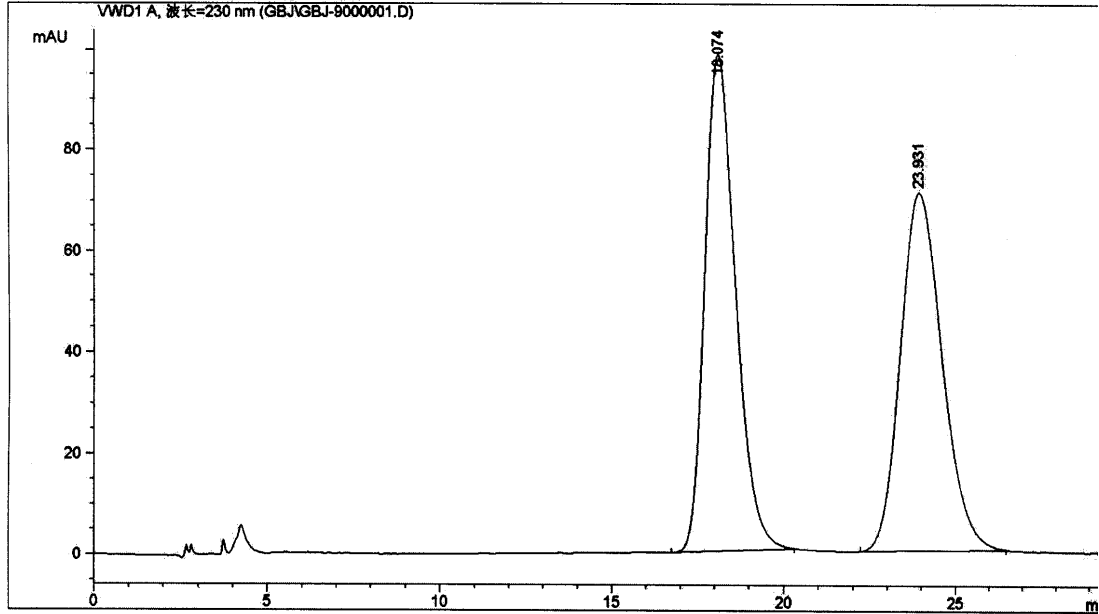

=====  
面积百分比报告  
=====

排序 : 信号  
乘积因子 : 1.0000  
稀释因子 : 1.0000  
内标使用乘积因子和稀释因子

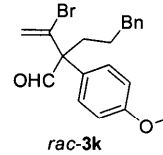

信号 1: VWD1 A, 波长=230 nm

| 峰 # | 保留时间 [min] | 类型 | 峰宽 [min] | 峰面积 mAU * s | 峰高 [mAU] | 峰面积 %   |
|-----|------------|----|----------|-------------|----------|---------|
| 1   | 18.074     | BB | 0.9349   | 6076.61914  | 98.14552 | 50.0421 |
| 2   | 23.931     | BB | 1.3125   | 6066.39941  | 70.71217 | 49.9579 |

总量 : 1.21430e4 168.85770

=====  
\*\*\* 报告结束 \*\*\*  
=====

## gbj-9-6-re''

实验时间: 2013-09-29, 15:16:24  
谱图文件: D:\浙大智达\N2000\样品\A0155.org

实验者: gbj  
报告时间: 2013-09-29, 15:40:08  
积分方法: 面积归一法

实验内容简介:  
OJ-H, n-Hexane:i-PrOH=80/20, 1.2 mL/min, 230 nm

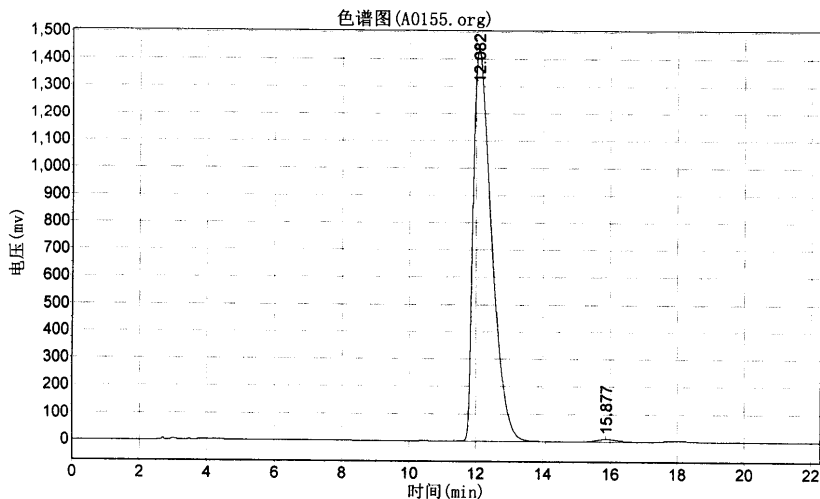

分析结果表

| 峰号 | 峰名 | 保留时间   | 峰高          | 峰面积          | 含量       |
|----|----|--------|-------------|--------------|----------|
| 1  |    | 12.082 | 1433178.500 | 54565620.000 | 99.3426  |
| 2  |    | 15.877 | 8745.838    | 361062.563   | 0.6574   |
| 总计 |    |        | 1441924.338 | 54926682.563 | 100.0000 |

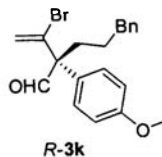

Recrystallization from  
CH<sub>2</sub>Cl<sub>2</sub>/n-hexane for three  
times

2013-09-29

## gbj-9-6-re''-rac

实验时间: 2013-09-29, 15:41:32  
谱图文件: D:\浙大智达\N2000\样品\A0156.org

实验者: gbj  
报告时间: 2013-09-29, 16:02:54  
积分方法: 面积归一法

实验内容简介:  
OJ-H, n-Hexane:i-PrOH=80/20, 1.2 mL/min, 230 nm

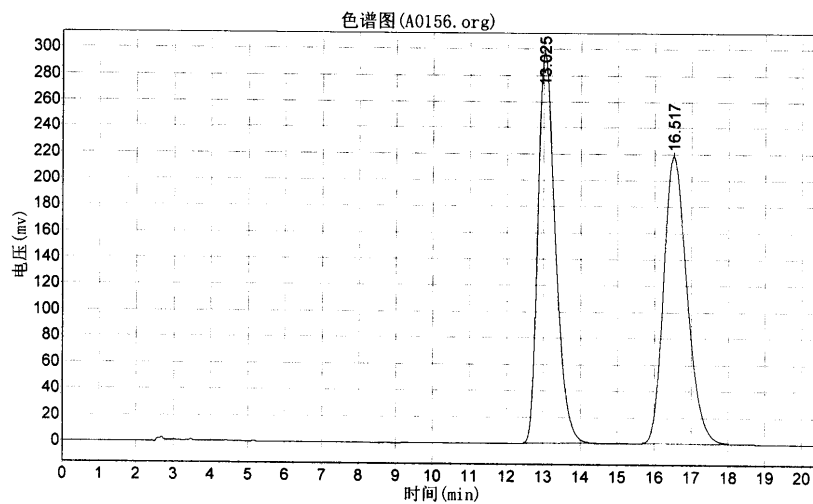

分析结果表

| 峰号 | 峰名 | 保留时间   | 峰高         | 峰面积          | 含量       |
|----|----|--------|------------|--------------|----------|
| 1  |    | 13.025 | 296638.094 | 9749461.000  | 50.4013  |
| 2  |    | 16.517 | 217890.938 | 9594220.000  | 49.5987  |
| 总计 |    |        | 514529.031 | 19343681.000 | 100.0000 |

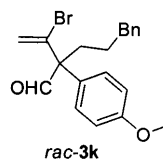

2013-09-29

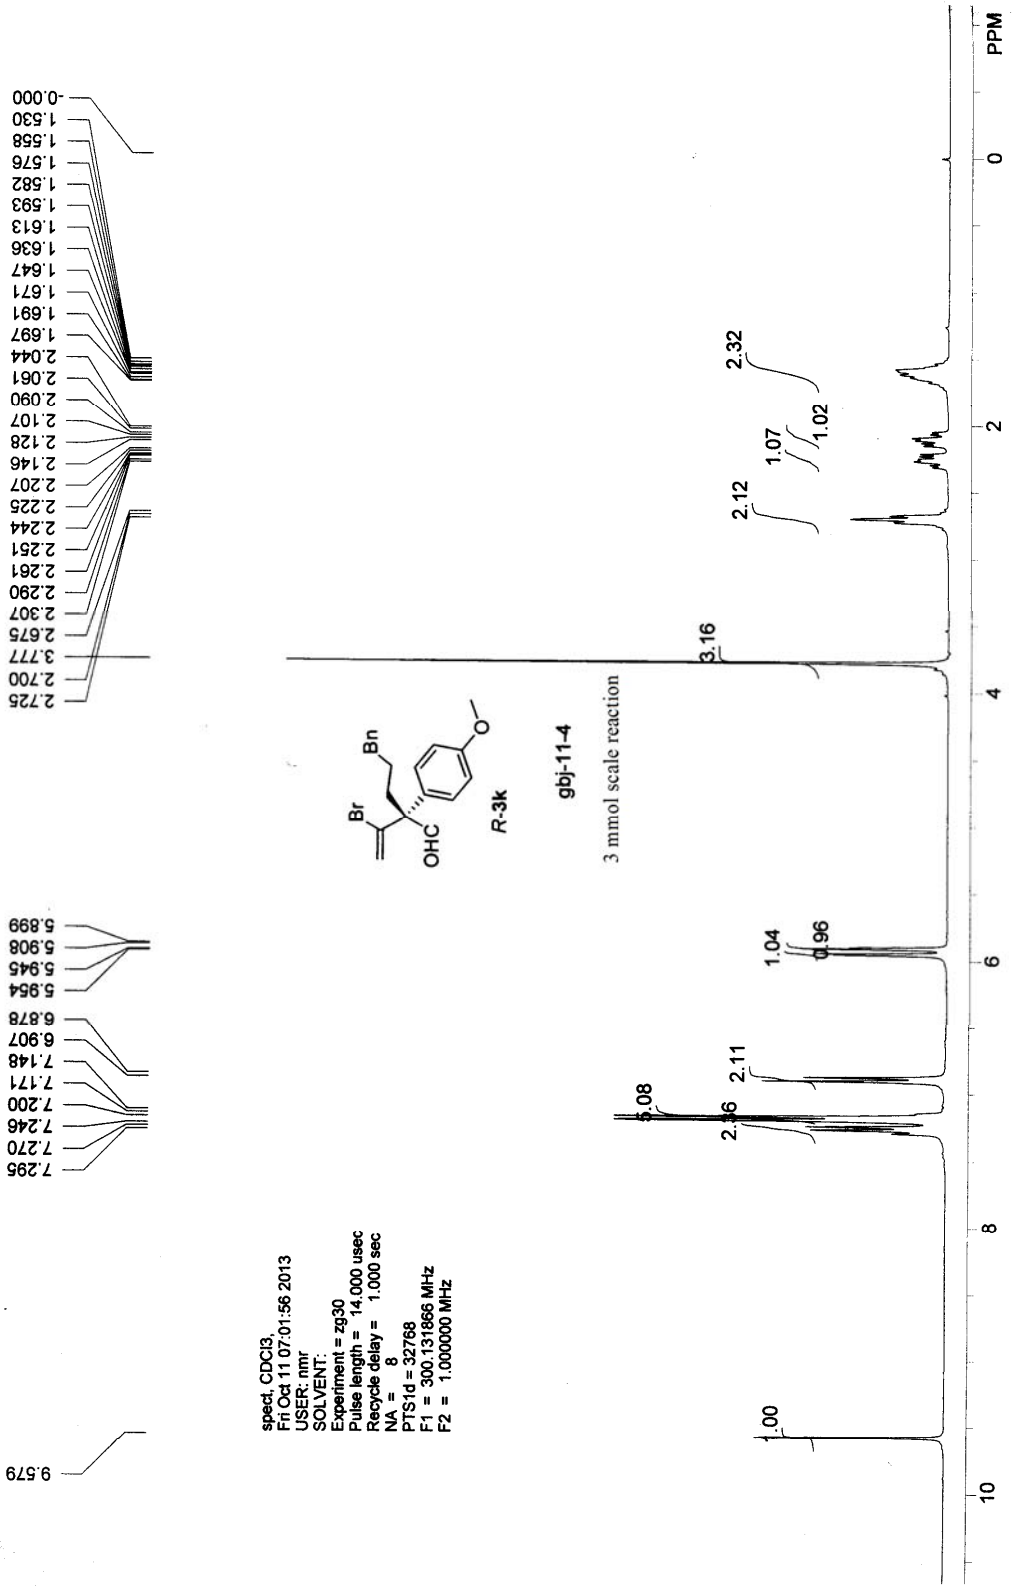

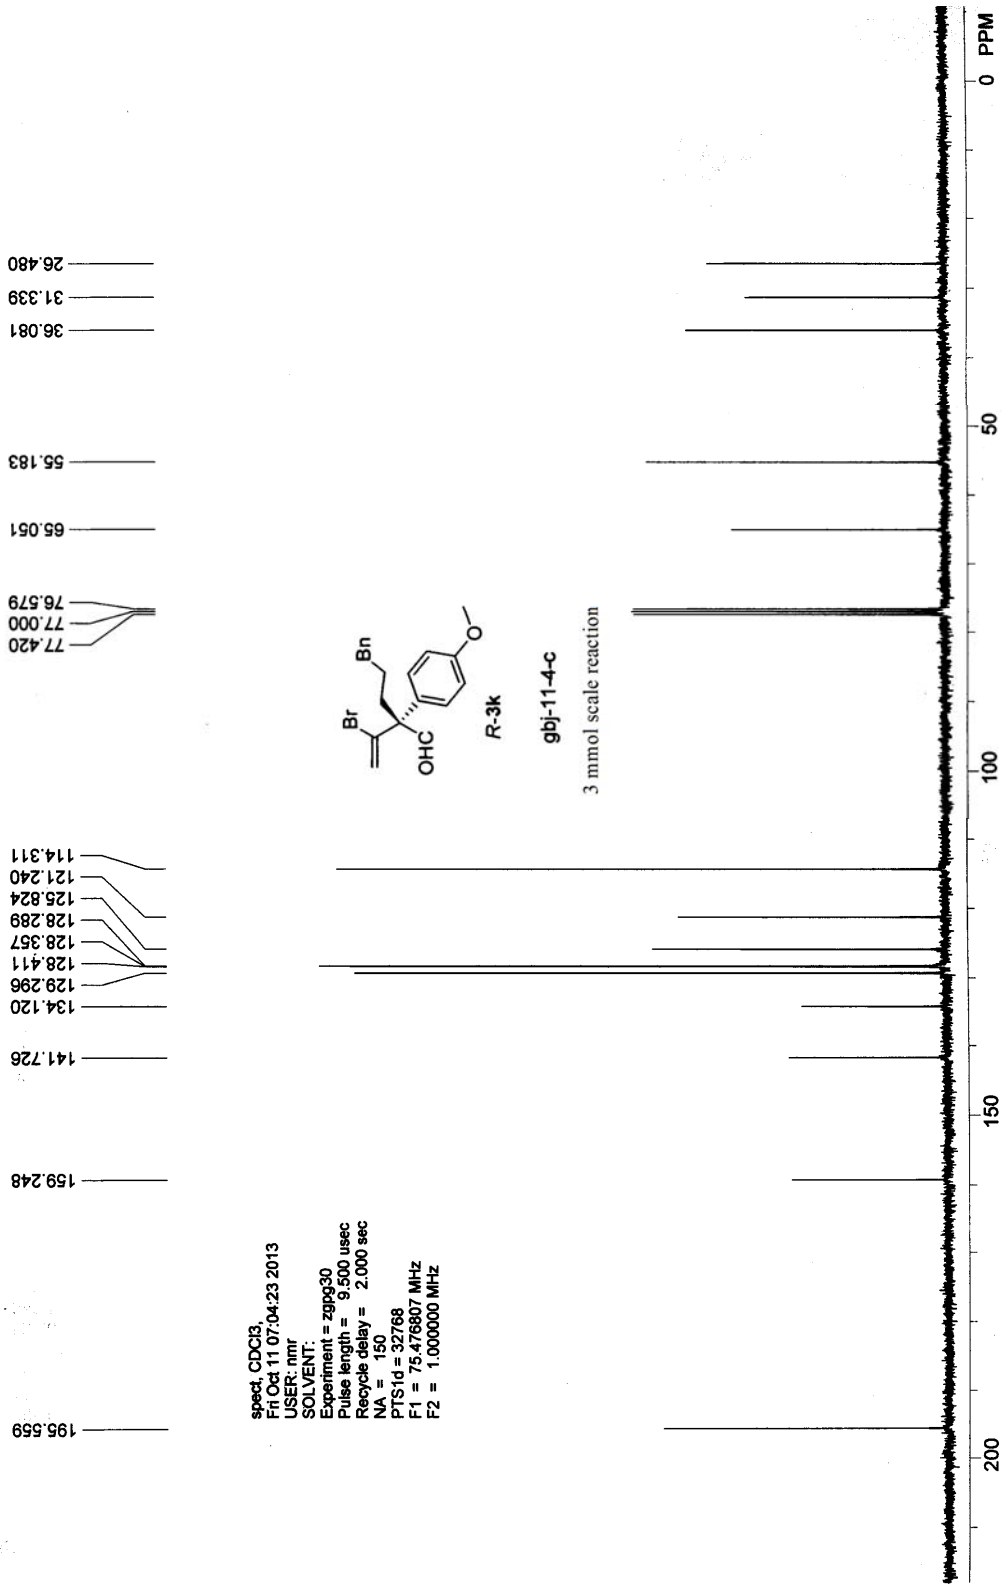

spect. CDCl3  
 Fri Oct 11 07:04:23 2013  
 USER: nmr  
 SOLVENT:  
 Experiment = zppg30  
 Pulse length = 9.500 usec  
 Recycle delay = 2.000 sec  
 NA = 150  
 P1 = 32768  
 F1 = 75.476807 MHz  
 F2 = 1.000000 MHz

## gbj-11-4

实验时间: 2013-10-12, 9:46:12  
谱图文件: D:\浙大智达\N2000\样品\A0172.org

实验者: gbj  
报告时间: 2013-10-12, 10:07:48  
积分方法: 面积归一法

实验内容简介:  
OJ-H, n-Hexane:i-PrOH=80/20, 1.2 mL/min, 230 nm

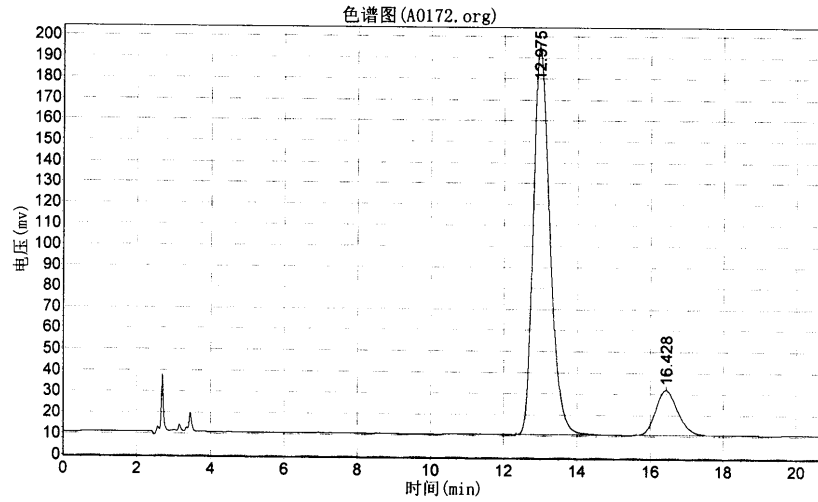

分析结果表

| 峰号 | 峰名 | 保留时间   | 峰高         | 峰面积         | 含量       |
|----|----|--------|------------|-------------|----------|
| 1  |    | 12.975 | 184242.047 | 5814136.000 | 86.5628  |
| 2  |    | 16.428 | 21283.324  | 902530.063  | 13.4372  |
| 总计 |    |        | 205525.371 | 6716666.063 | 100.0000 |

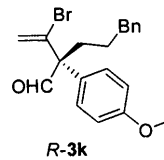

2013-10-12



## gbj-11-4-rac

实验时间: 2013-10-12, 10:08:53  
谱图文件: D:\浙大智达\N2000\样品\A0173.org

实验者: gbj  
报告时间: 2013-10-12, 10:30:40  
积分方法: 面积归一法

实验内容简介:  
OJ-H, n-Hexane:i-PrOH=80/20, 1.2 mL/min, 230 nm

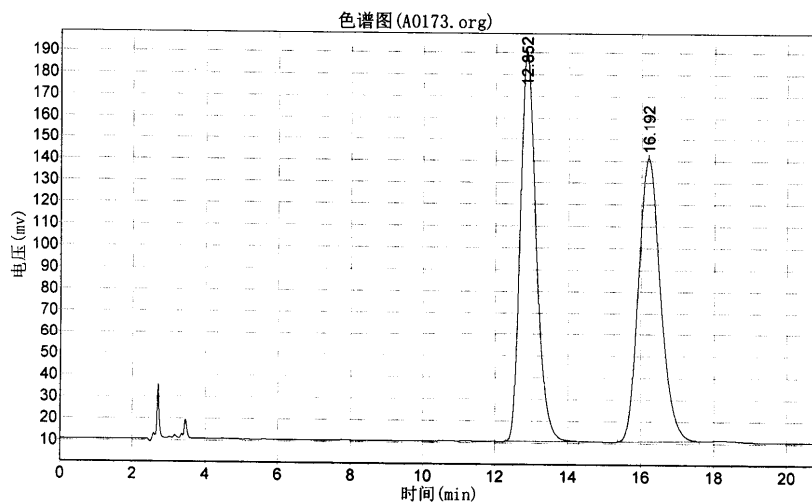

分析结果表

| 峰号 | 峰名 | 保留时间   | 峰高         | 峰面积          | 含量       |
|----|----|--------|------------|--------------|----------|
| 1  |    | 12.852 | 178652.641 | 5448835.000  | 50.1216  |
| 2  |    | 16.192 | 130059.906 | 5422397.500  | 49.8784  |
| 总计 |    |        | 308712.547 | 10871232.500 | 100.0000 |

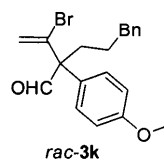

2013-10-12

## gbj-11-4jiejing2

实验时间: 2013-11-06, 9:40:05  
谱图文件: D:\浙大智达\N2000\样品\A0184.org

实验者: gbj  
报告时间: 2013-11-06, 10:01:42  
积分方法: 面积归一法

实验内容简介:  
OJ-H, n-Hexane:i-PrOH=80/20, 1.2 mL/min, 230 nm

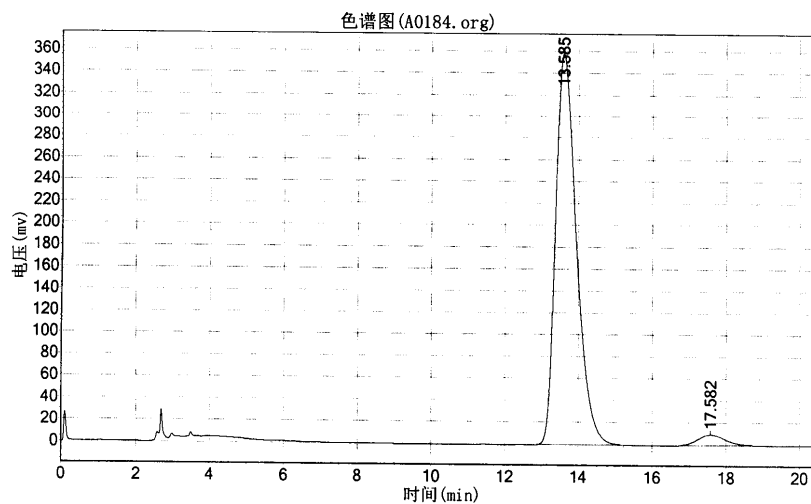

分析结果表

| 峰号 | 峰名 | 保留时间   | 峰高         | 峰面积          | 含量       |
|----|----|--------|------------|--------------|----------|
| 1  |    | 13.585 | 357801.625 | 14014994.000 | 96.7883  |
| 2  |    | 17.582 | 9261.667   | 465058.344   | 3.2117   |
| 总计 |    |        | 367063.292 | 14480052.344 | 100.0000 |

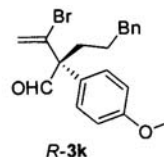

Recrystallization from  
CH<sub>2</sub>Cl<sub>2</sub>/n-hexane for twice

2013-11-06

## gbj-11-4-rac

实验时间: 2013-11-06, 10:03:01  
谱图文件: D:\浙大智达\N2000\样品\A0185.org

实验者: gbj  
报告时间: 2013-11-06, 10:28:20  
积分方法: 面积归一法

实验内容简介:  
OJ-H, n-Hexane:i-PrOH=80/20, 1.2 mL/min, 230 nm

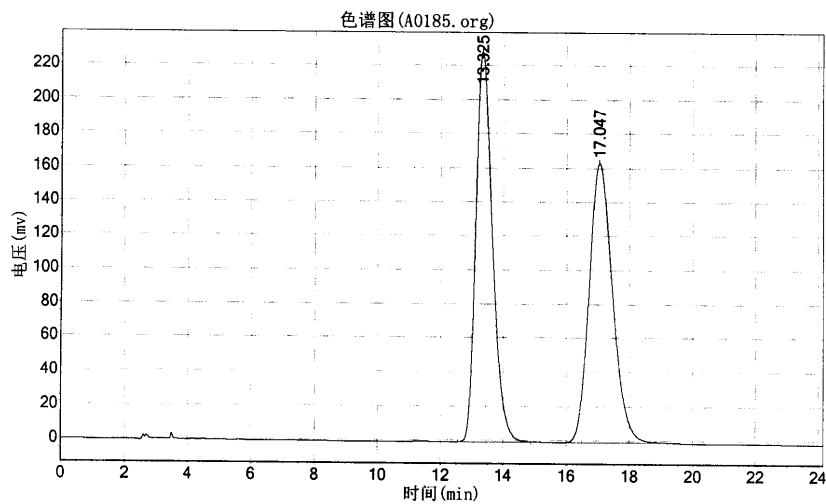

分析结果表

| 峰号 | 峰名 | 保留时间   | 峰高         | 峰面积          | 含量       |
|----|----|--------|------------|--------------|----------|
| 1  |    | 13.325 | 228785.078 | 8396188.000  | 50.0590  |
| 2  |    | 17.047 | 163688.422 | 8376411.000  | 49.9410  |
| 总计 |    |        | 392473.500 | 16772599.000 | 100.0000 |

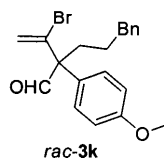

2013-11-06

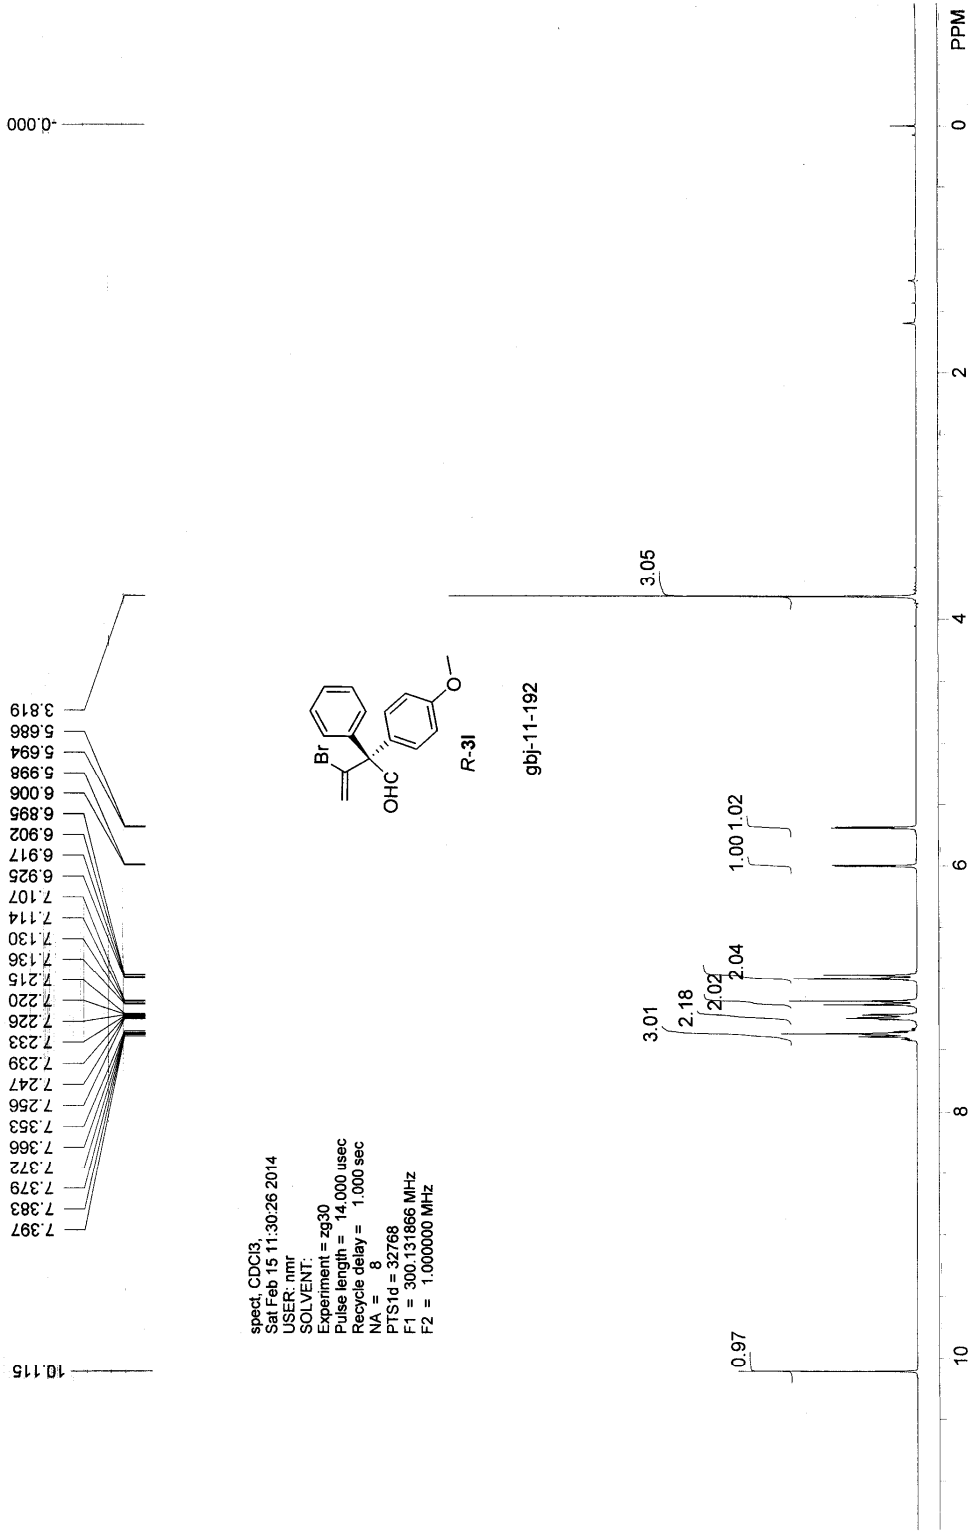

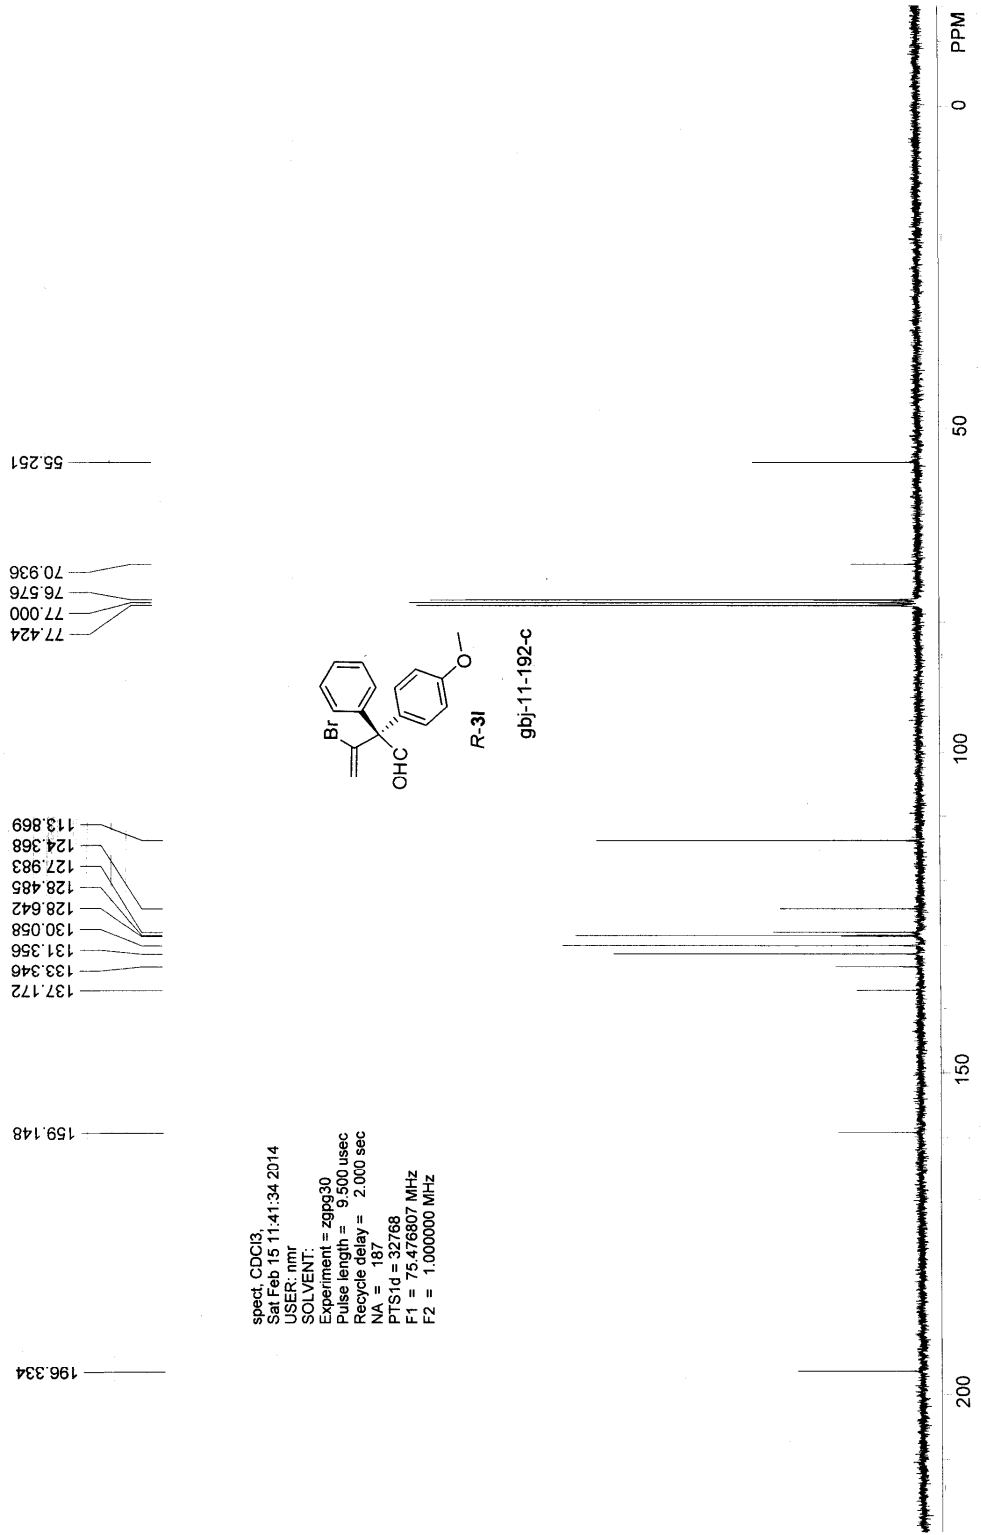

spect\_CDCI3  
 Sat Feb 15 11:41:34 2014  
 USER: mnr  
 SOLVENT:  
 Experiment = zrgg30  
 Pulse length = 9.500 usec  
 Recycle delay = 2.000 sec  
 NA = 187  
 PTS1d = 32768  
 F1 = 75.476807 MHz  
 F2 = 1.000000 MHz

## gbj-11-192

实验时间: 2014-02-15, 19:09:08  
谱图文件: D:\浙大智达\N2000\样品\B0056.org

实验者: gbj  
报告时间: 2014-02-23, 13:15:43  
积分方法: 面积归一法

实验内容简介:  
AS-H, n-hexane/iPrOH = 80/20, 230 nm, 1.0 ml/min

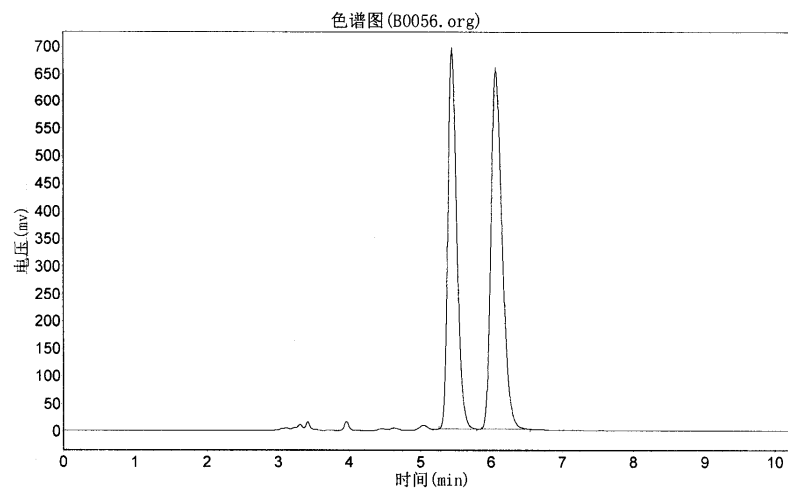

分析结果表

| 峰号 | 峰名 | 保留时间  | 峰高          | 峰面积          | 含量       |
|----|----|-------|-------------|--------------|----------|
| 1  |    | 5.452 | 687774.875  | 6036592.000  | 45.8403  |
| 2  |    | 6.072 | 650860.063  | 7132147.000  | 54.1597  |
| 总计 |    |       | 1338634.938 | 13168739.000 | 100.0000 |

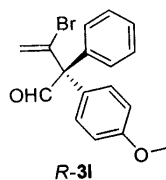

2014-02-23

## gbj-11-144

实验时间: 2014-02-15, 18:56:20  
谱图文件: D:\浙大智达\N2000\样品\B0055.org

实验者: gbj  
报告时间: 2014-02-23, 13:17:14  
积分方法: 面积归一法

实验内容简介:  
AS-H, n-hexane/iPrOH = 80/20, 230 nm, 1.0 ml/min

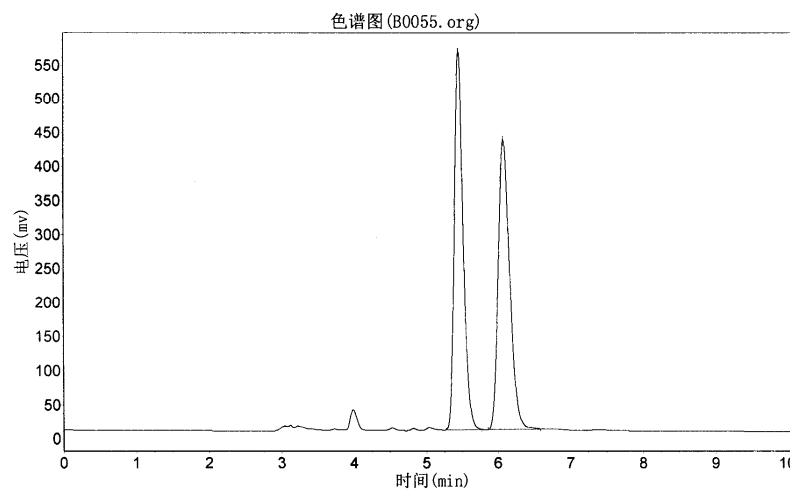

分析结果表

| 峰号 | 峰名 | 保留时间  | 峰高         | 峰面积         | 含量       |
|----|----|-------|------------|-------------|----------|
| 1  |    | 5.453 | 556580.688 | 4727065.500 | 50.0557  |
| 2  |    | 6.075 | 425159.719 | 4716546.000 | 49.9443  |
| 总计 |    |       | 981740.406 | 9443611.500 | 100.0000 |

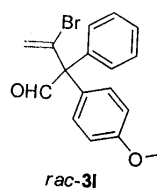

2014-02-23

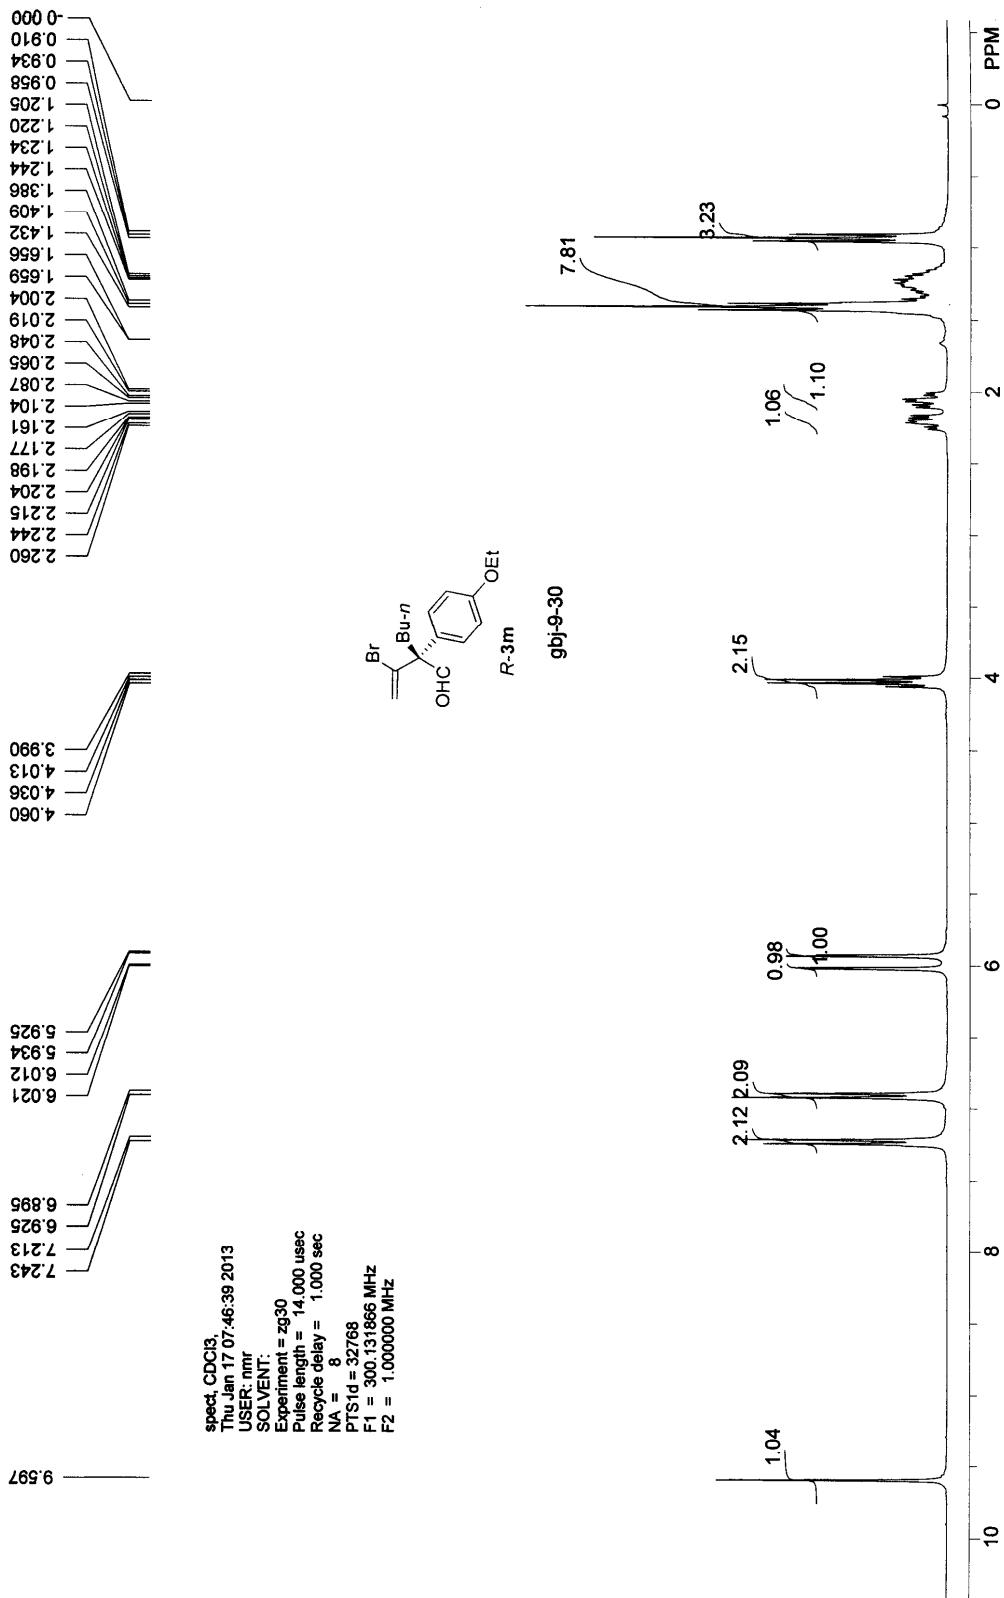



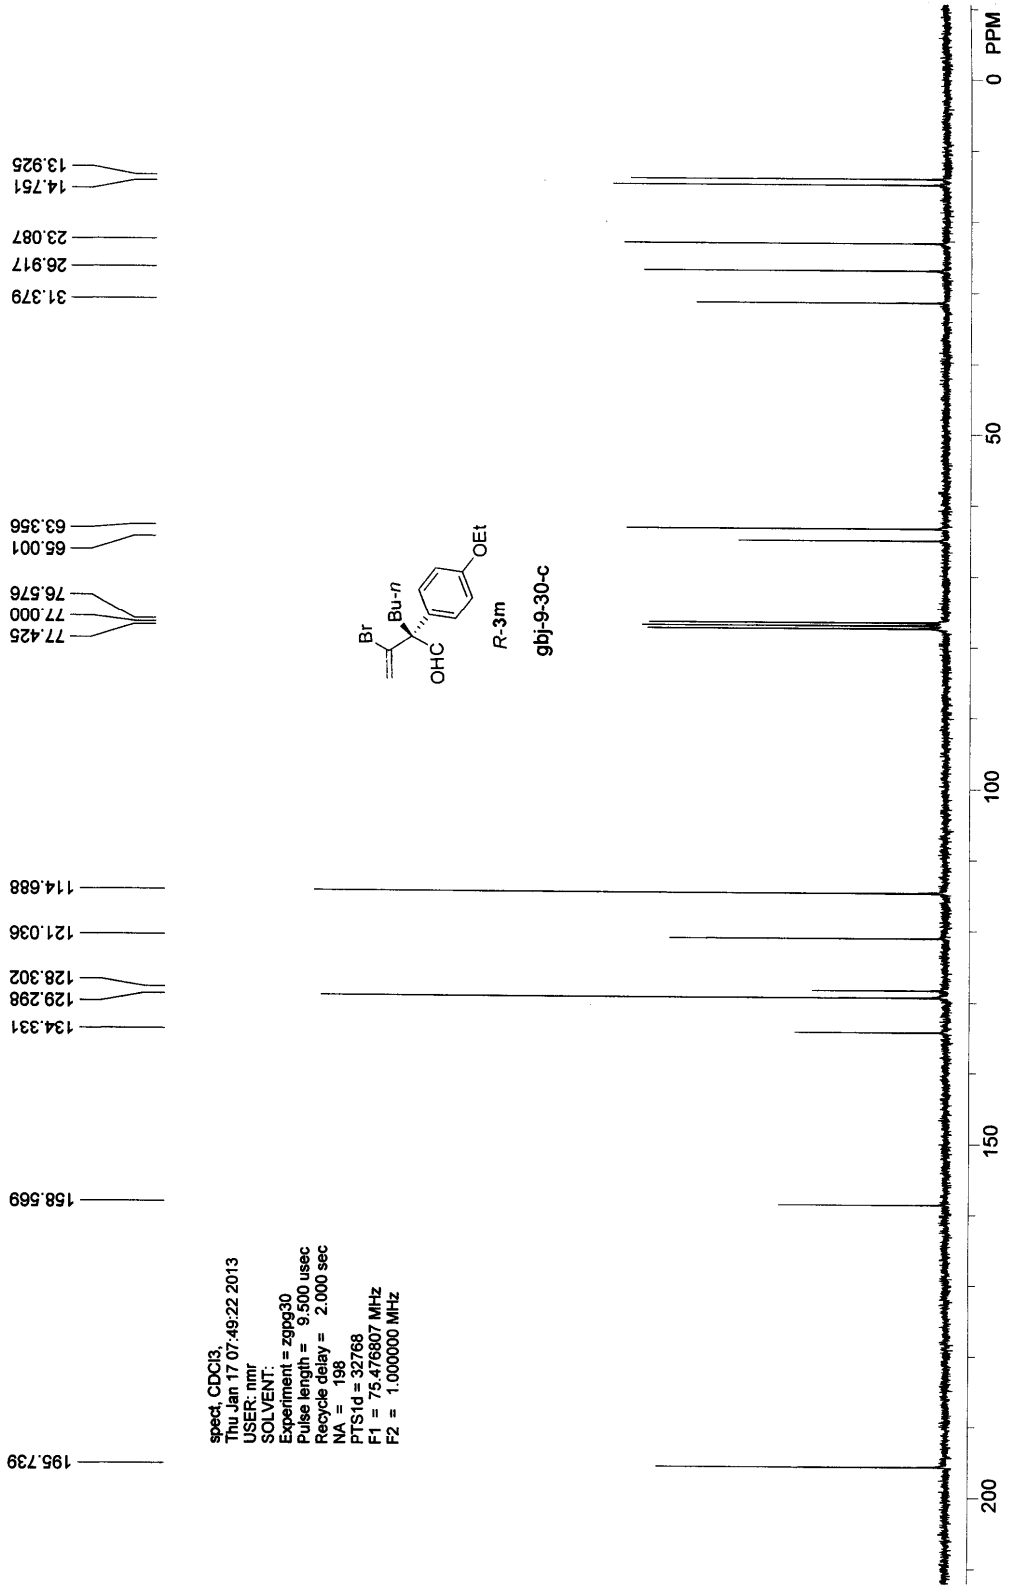

spect, CDC13,  
 Thu Jan 17 07:49:22 2013  
 USER: nmr  
 SOLVENT:  
 Experiment = zjgg30  
 Pulse length = 9.500 usec  
 Recycle delay = 2.000 sec  
 NA = 198  
 P1S1d = 32768  
 F1 = 75.476807 MHz  
 F2 = 1.000000 MHz

数据文件 D:\Chem32\1\DATA\GBJ\GBJ-9000027.D  
 样品名: gbj-9-30

OJ-H; Hexane/iPrOH=80/20; 1.2 ml/min, 230 nm

-----  
 进样日期 : 2013-1-17 19:50:24  
 样品名称 : gbj-9-30 位置 : -  
 操作者 : gbj  
 仪器 : 仪器 1  
 方法 : D:\CHEM32\1\METHODS\ZYY\_LC.M  
 最后修改 : 2013-1-17 19:25:35 : lkj  
 (调用后修改)

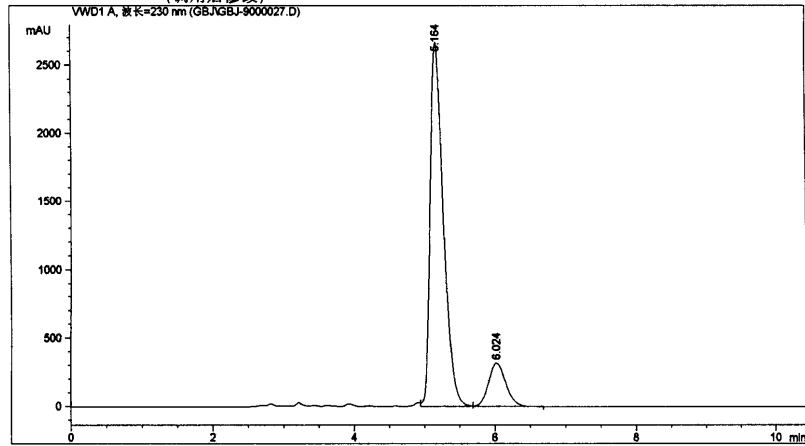

-----  
 面积百分比报告  
 -----

排序 : 信号  
 乘积因子 : 1.0000  
 稀释因子 : 1.0000  
 内标使用乘积因子和稀释因子

信号 1: VWD1 A, 波长=230 nm

| 峰 # | 保留时间 [min] | 类型 | 峰宽 [min] | 峰面积 mAU * s | 峰高 [mAU]   | 峰面积 %   |
|-----|------------|----|----------|-------------|------------|---------|
| 1   | 5.164      | VV | 0.1978   | 3.45495e4   | 2665.43726 | 86.3428 |
| 2   | 6.024      | VB | 0.2672   | 5464.83545  | 316.11801  | 13.6572 |

总量 : 4.00144e4 2981.55527

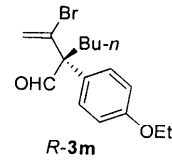

-----  
 \*\*\* 报告结束 \*\*\*  
 -----

数据文件 D:\Chem32\1\DATA\GBJ\GBJ-9000026.D  
 样品名: gbj-9-29

OJ-H; Hexane/iPrOH=80/20; 1.2 ml/min, 230 nm

-----  
 进样日期 : 2013-1-17 19:37:40  
 样品名称 : gbj-9-29 位置 : -  
 操作者 : gbj  
 仪器 : 仪器 1  
 方法 : D:\CHEM32\1\METHODS\ZYY\_LC.M  
 最后修改 : 2013-1-17 19:25:35 : lxj  
 (调用后修改)

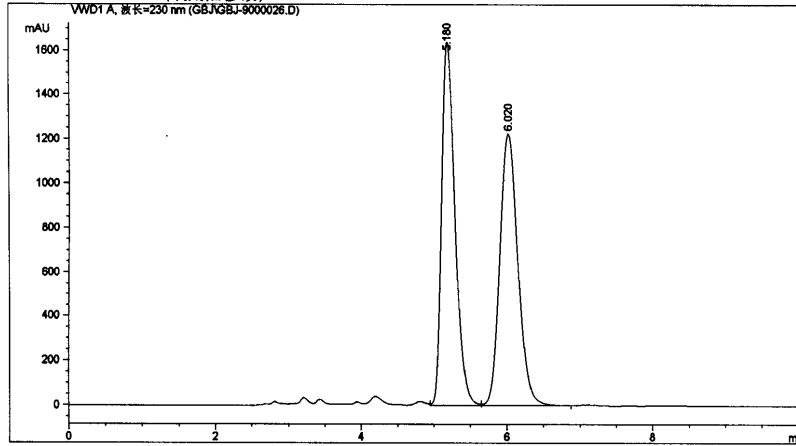

-----  
 面积百分比报告  
 -----

排序 : 信号  
 乘积因子 : 1.0000  
 稀释因子 : 1.0000  
 内标使用乘积因子和稀释因子

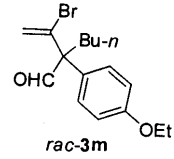

信号 1: VWD1 A, 波长=230 nm

| 峰 # | 保留时间 [min] | 类型 | 峰宽 [min] | 峰面积 mAU *s | 峰高 [mAU]   | 峰面积 %   |
|-----|------------|----|----------|------------|------------|---------|
| 1   | 5.180      | VV | 0.1954   | 2.09622e4  | 1643.35706 | 49.7885 |
| 2   | 6.020      | VV | 0.2671   | 2.11403e4  | 1223.74927 | 50.2115 |

总量 : 4.21024e4 2867.10632

-----  
 \*\*\* 报告结束 \*\*\*  
 -----

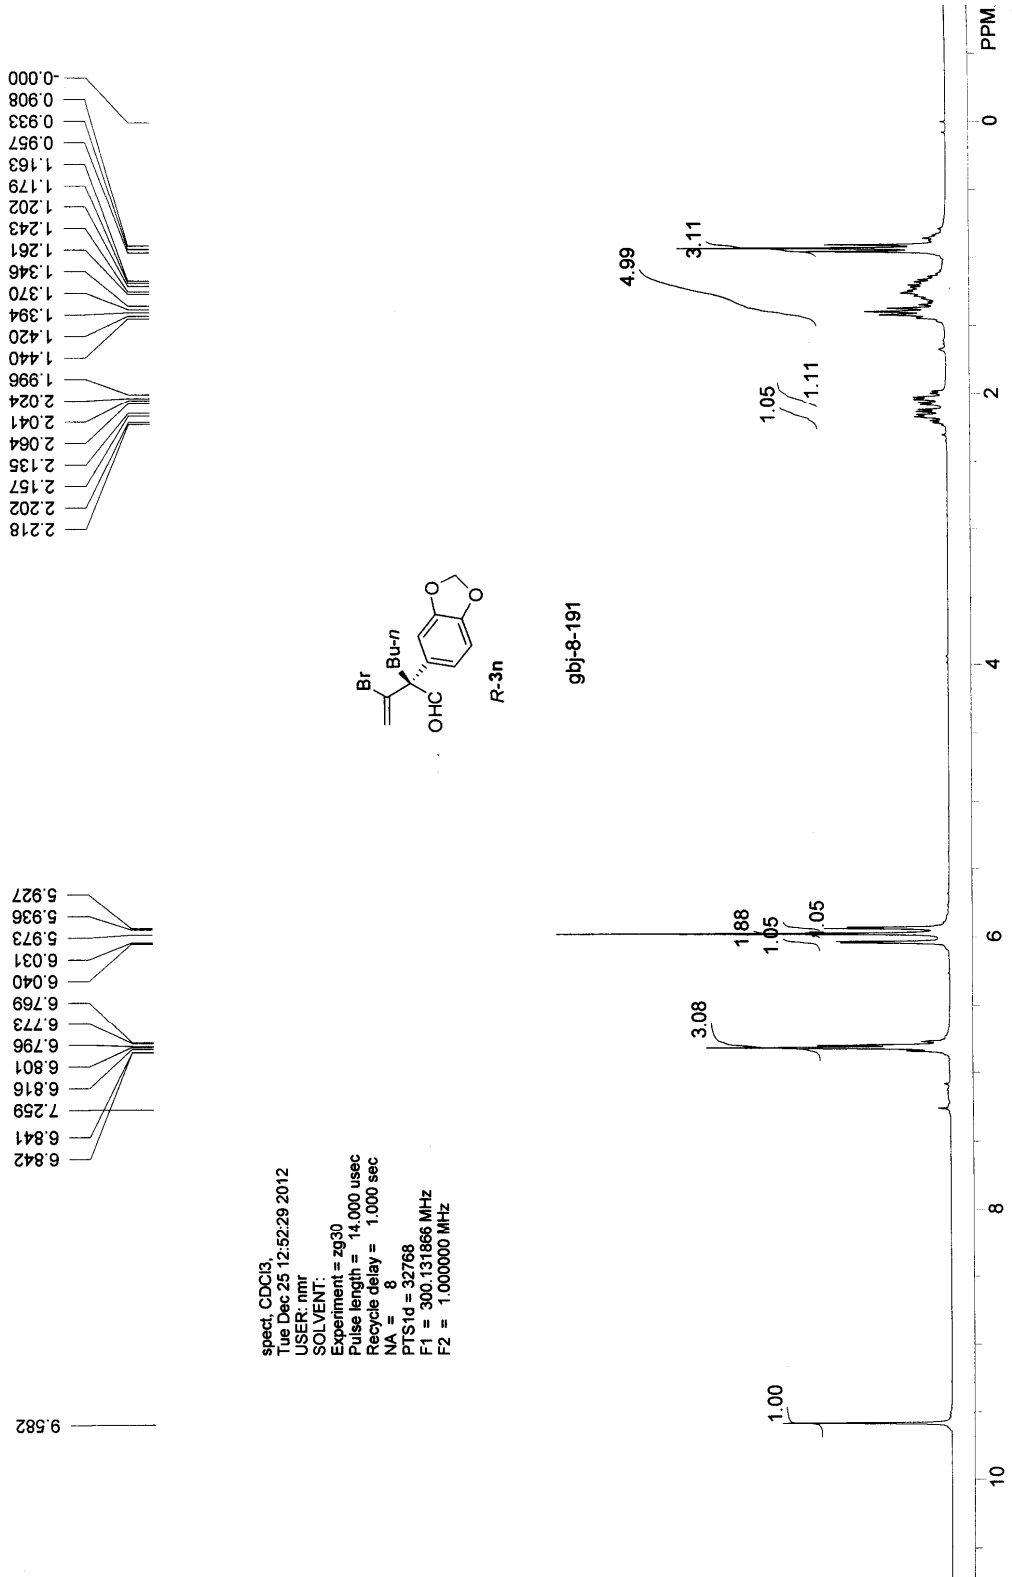

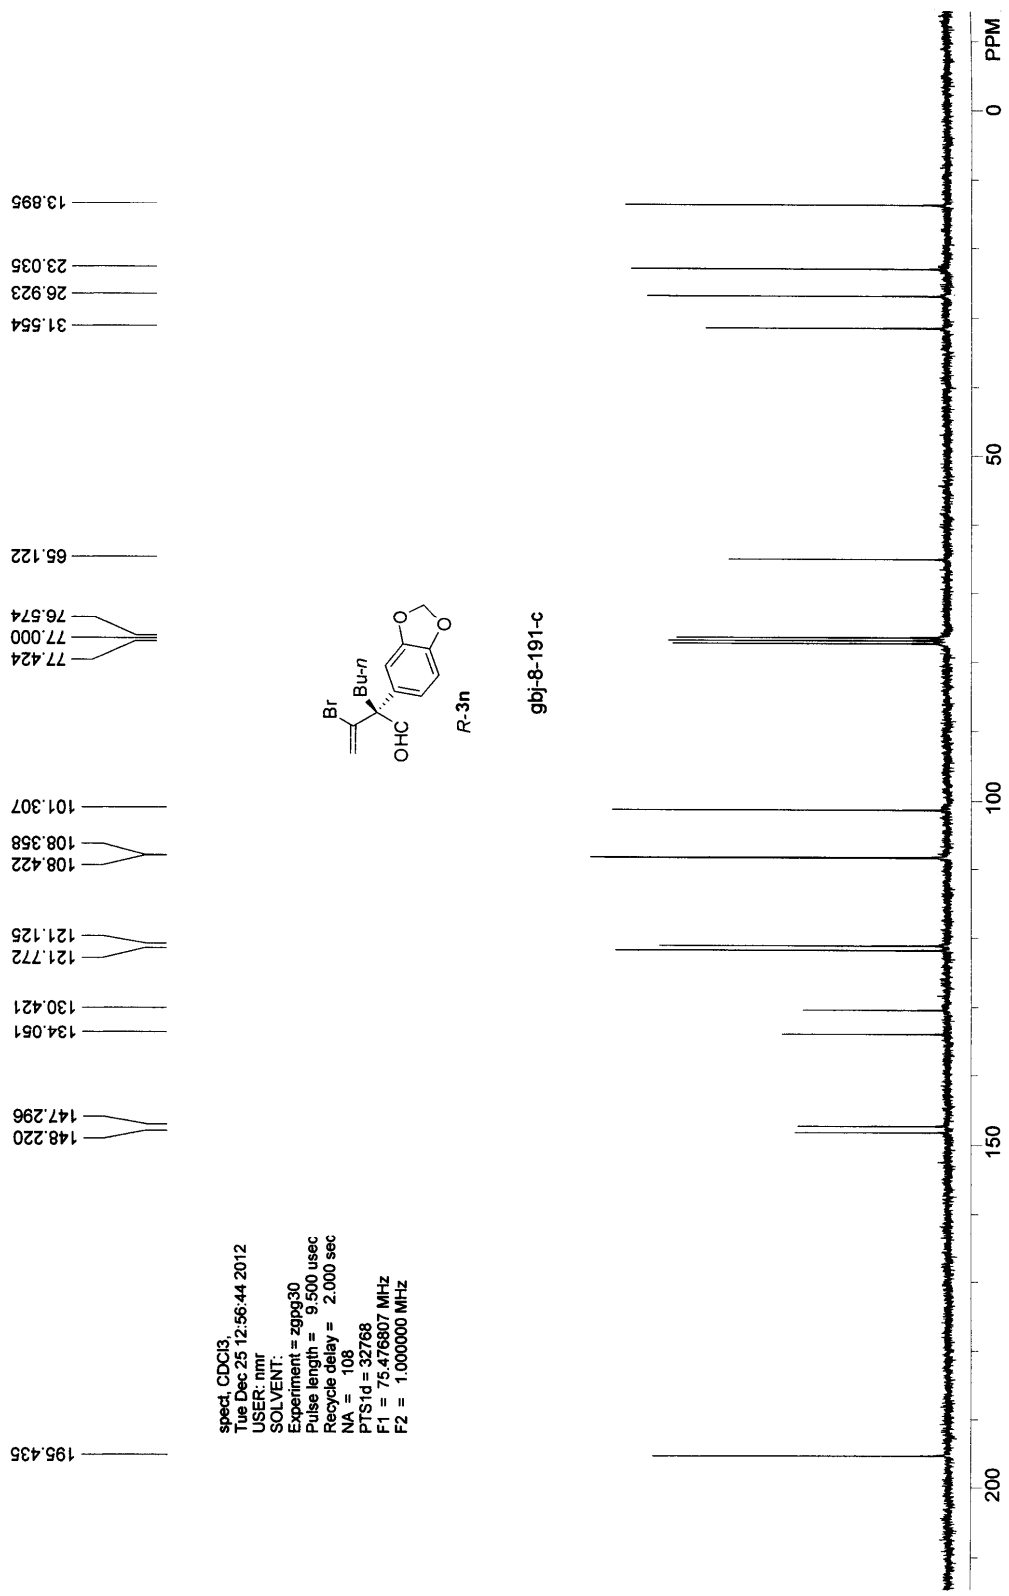

spect, CDCl3,  
 Tue Dec 25 12:56:44 2012  
 USER: nmf  
 SOLVENT:  
 Experiment = zgpg30  
 Pulse length = 9.500 usec  
 Recycle delay = 2.000 sec  
 NA = 108  
 PTS1d = 32768  
 F1 = 75.476807 MHz  
 F2 = 1.0000000 MHz

gbj-8-191-c

File D:\HPCHEM\1\DATA\GBJ\GBJ-8134.D

Sample Name: gbj-8-19

OJ-H, n-Hexane:i-PrOH= 80/20, 1.2 mL/min, 230 nm

=====  
Injection Date : 12/25/2012 1:19:20 PM                      Location : -  
Sample Name : gbj-8-191  
Acq. Operator : gbj  
Method : D:\HPCHEM\1\METHODS\XFX\_LC.M  
Last changed : 12/25/2012 12:47:49 PM by gbj  
(modified after loading)  
=====

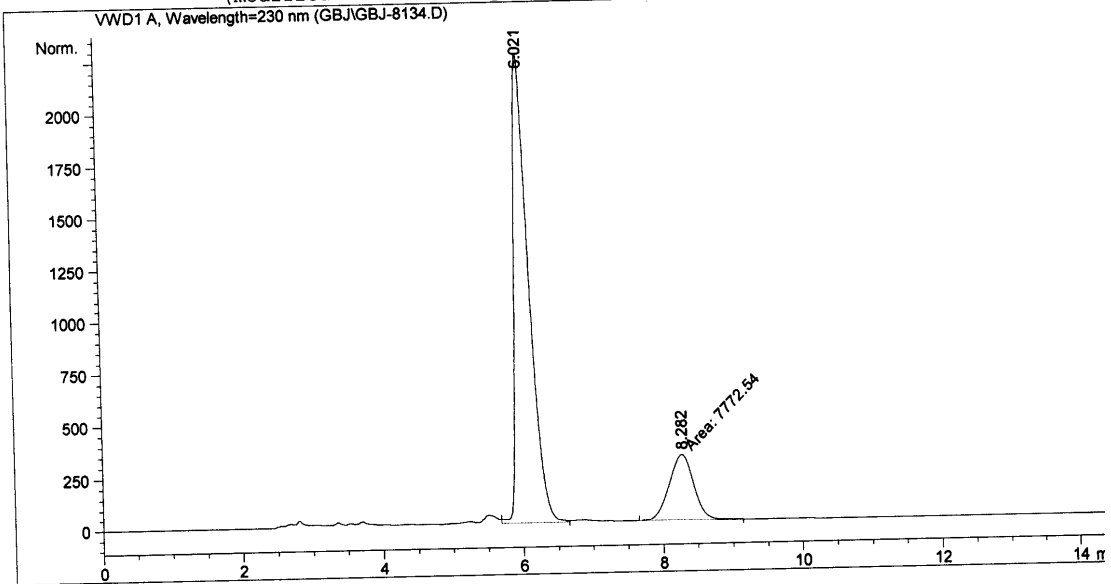

=====  
Area Percent Report  
=====

Sorted By : Signal  
Multiplier : 1.0000  
Dilution : 1.0000  
Use Multiplier & Dilution Factor with ISTDs

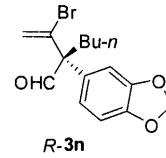

Signal 1: VWD1 A, Wavelength=230 nm

| Peak # | RetTime [min] | Type | Width [min] | Area mAU *s | Height [mAU] | Area %  |
|--------|---------------|------|-------------|-------------|--------------|---------|
| 1      | 6.021         | VV   | 0.2237      | 3.32731e4   | 2266.35791   | 81.0637 |
| 2      | 8.282         | MM   | 0.4118      | 7772.53711  | 314.56506    | 18.9363 |

Totals :                                              4.10456e4    2580.92297

Results obtained with enhanced integrator!

=====  
\*\*\* End of Report \*\*\*

OJ-H, n-Hexane:i-PrOH= 80/20, 1.2 mL/min, 230 nm

=====  
 Injection Date : 12/25/2012 1:04:30 PM Location : -  
 Sample Name : gbj-8-190  
 Acq. Operator : gbj  
 Method : D:\HPCHEM\1\METHODS\XFX\_LC.M  
 Last changed : 12/25/2012 12:47:49 PM by gbj  
 (modified after loading)  
 =====

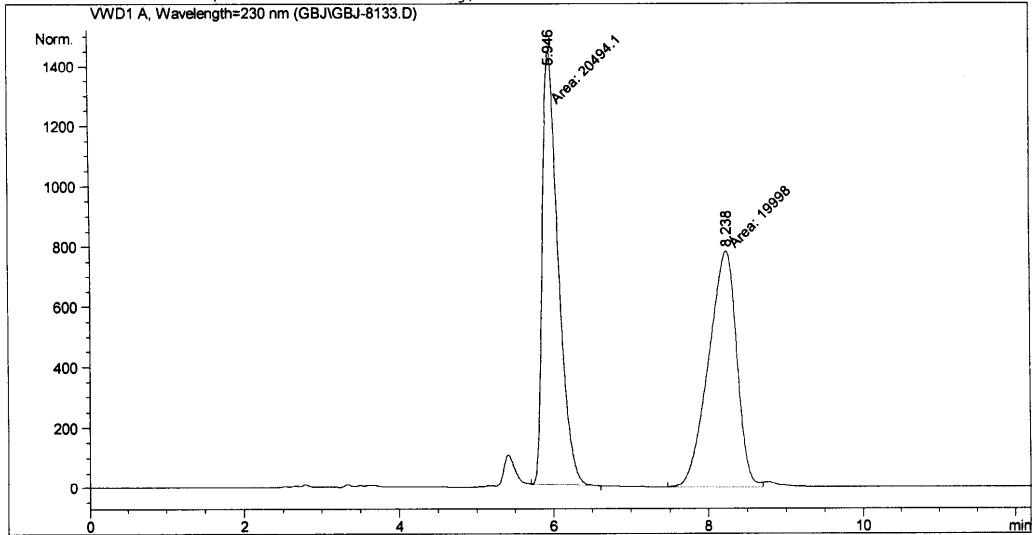

=====  
 Area Percent Report  
 =====

Sorted By : Signal  
 Multiplier : 1.0000  
 Dilution : 1.0000  
 Use Multiplier & Dilution Factor with ISTDs

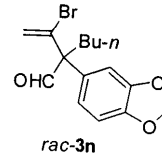

Signal 1: VWD1 A, Wavelength=230 nm

| Peak # | RetTime [min] | Type | Width [min] | Area MAU  | Area *s    | Height [mAU] | Area % |
|--------|---------------|------|-------------|-----------|------------|--------------|--------|
| 1      | 5.946         | MM   | 0.2371      | 2.04941e4 | 1440.64673 | 50.6126      |        |
| 2      | 8.238         | MM   | 0.4241      | 1.99980e4 | 785.84131  | 49.3874      |        |

Totals : 4.04921e4 2226.48804

Results obtained with enhanced integrator!

=====  
 \*\*\* End of Report \*\*\*

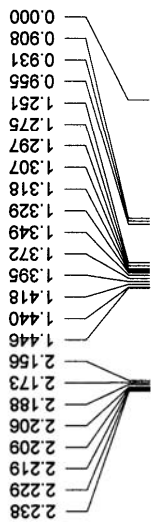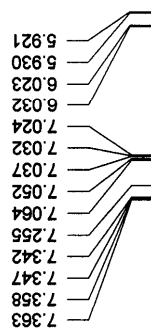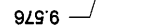

spect, CDCl3,  
Fri Jan 25 00:48:04 2013  
USER: nmr  
SOLVENT:  
Experiment = zg30  
Pulse length = 14.000 usec  
Recycle delay = 1.000 sec  
NA = 8  
PTS1d = 32768  
F1 = 300.131866 MHz  
F2 = 1.000000 MHz

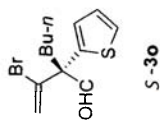

gbj-9-44

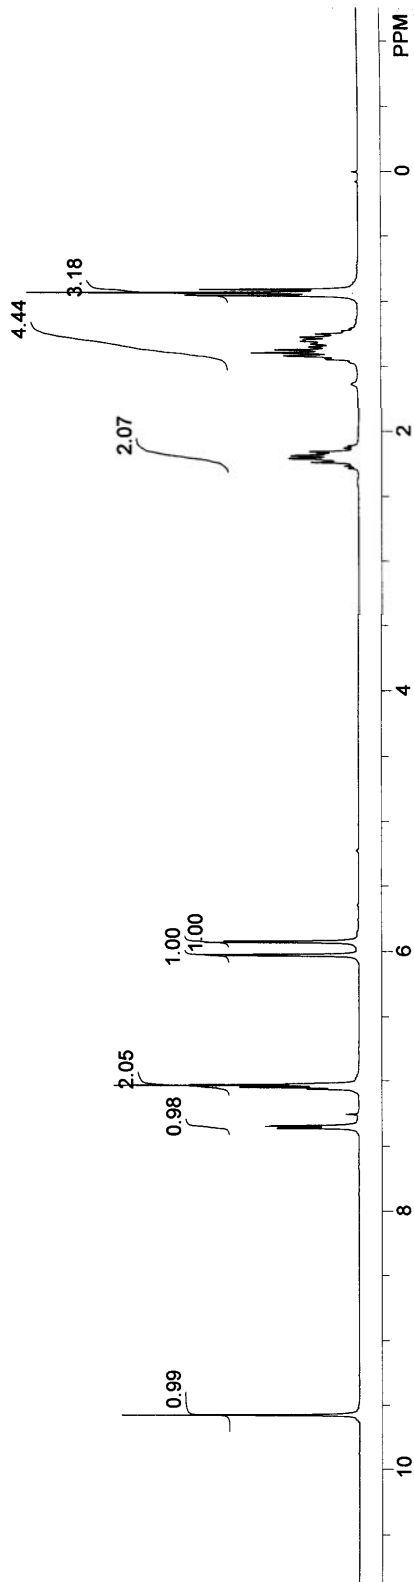



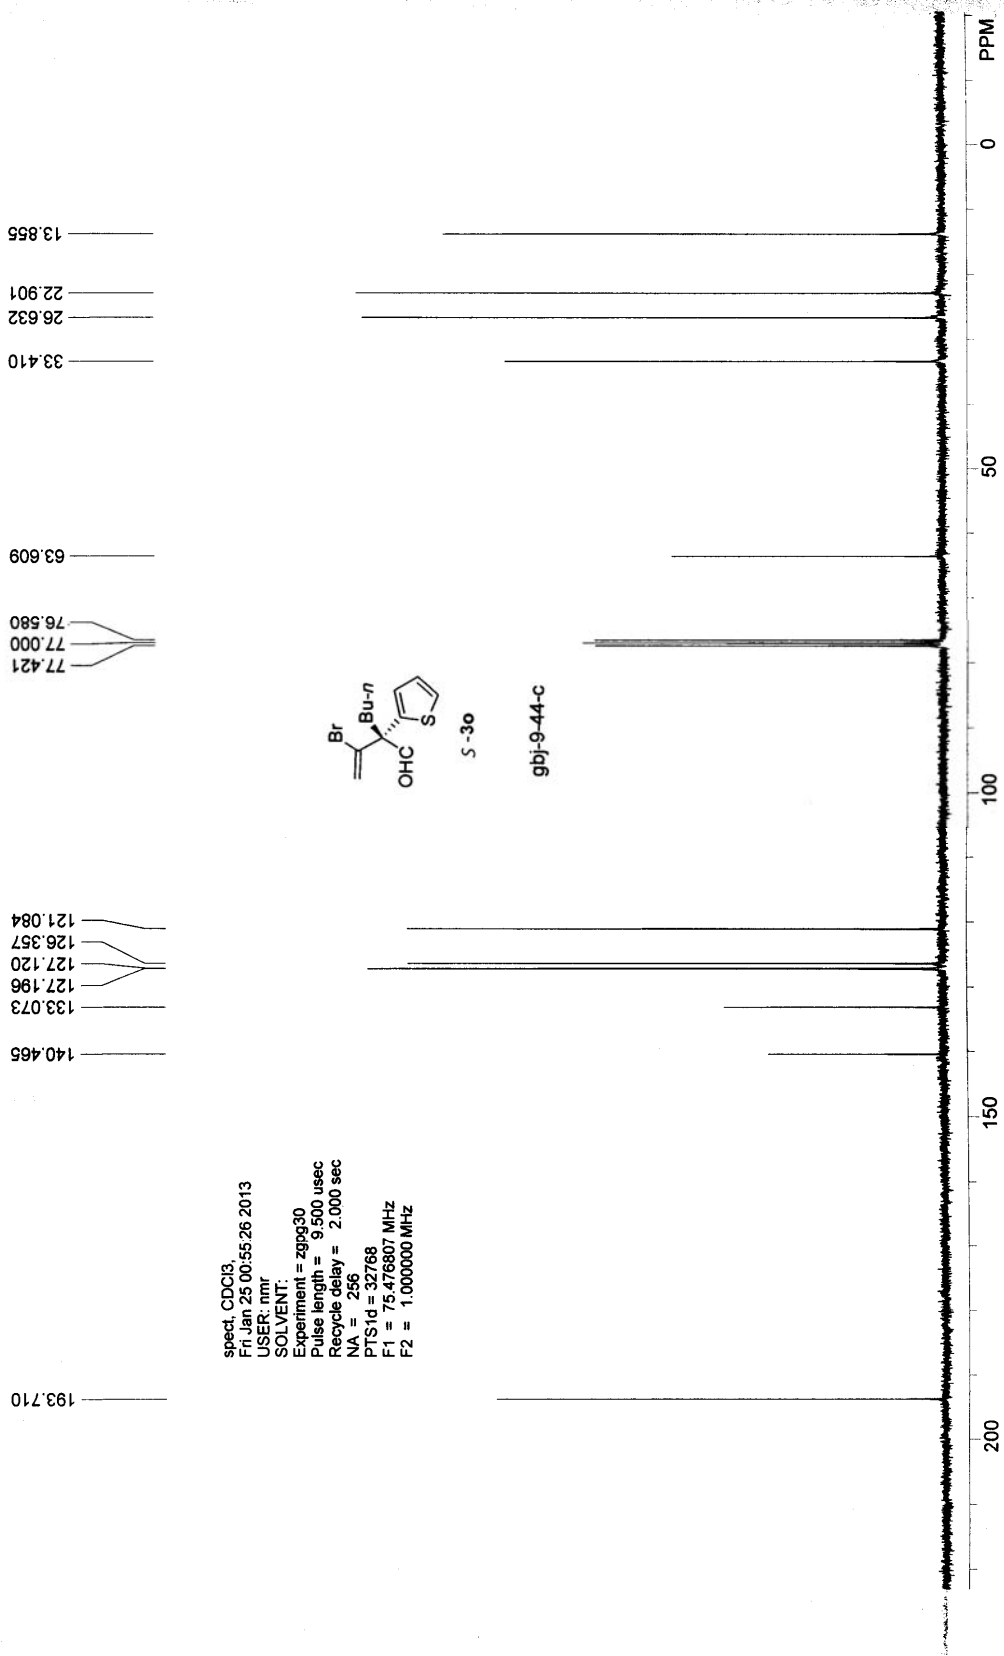

spect, CDCl3  
 Fri Jan 25 00:55:26 2013  
 USER: nmr  
 SOLVENT:  
 Experiment = zq9q30  
 Pulse length = 9.500 usec  
 Recycle delay = 2.000 sec  
 NA = 256  
 P1Std = 32768  
 F1 = 75.476807 MHz  
 F2 = 1.000000 MHz

数据文件 D:\Chem32\1\DATA\GBJ\GBJ-9000031.D  
 样品名: gbj-9-44

OJ-H; Hexane/iPrOH =80/20; 1.2 ml/min, 230 nm

-----  
 进样日期 : 2013-1-28 9:33:42  
 样品名称 : gbj-9-44 位置 : -  
 操作者 : gbj  
 仪器 : 仪器 1  
 方法 : D:\CHEM32\1\METHODS\ZYY\_LC.M  
 最后修改 : 2013-1-28 9:06:37 : lqk  
 (调用后修改)

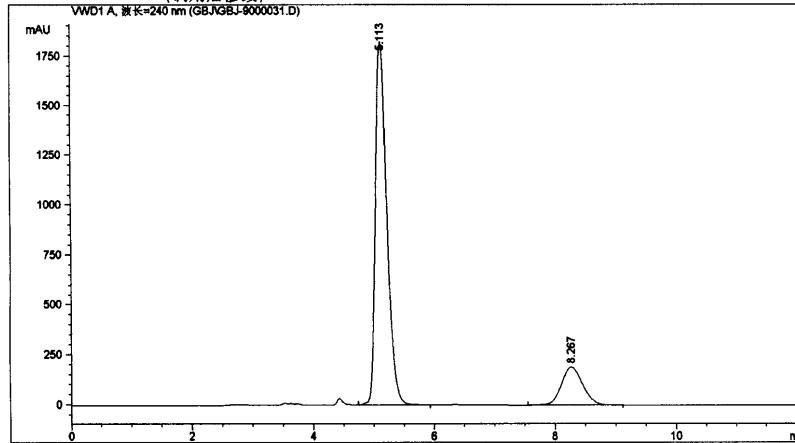

-----  
 面积百分比报告  
 -----

排序 : 信号  
 乘积因子 : 1.0000  
 稀释因子 : 1.0000  
 内标使用乘积因子和稀释因子

信号 1: VWD1 A, 波长=240 nm

| 峰 # | 保留时间 [min] | 类型 | 峰宽 [min] | 峰面积 mAU * s | 峰高 [mAU]   | 峰面积 %   |
|-----|------------|----|----------|-------------|------------|---------|
| 1   | 5.113      | VV | 0.2029   | 2.39923e4   | 1824.84106 | 83.7636 |
| 2   | 8.267      | BB | 0.3799   | 4650.55811  | 189.21135  | 16.2364 |

总量 : 2.86429e4 2014.05241

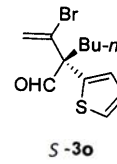

\*\*\* 报告结束 \*\*\*

数据文件 D:\Chem32\1\DATA\GBJ\GBJ-9000030.D  
 样品名: gbj-9-51

OJ-H; Hexane/iPrOH =80/20; 1.2 ml/min, 230 nm

-----  
 进样日期 : 2013-1-28 9:19:43  
 样品名称 : gbj-9-51 位置 : -  
 操作者 : gbj  
 仪器 : 仪器 1  
 方法 : D:\CHEM32\1\METHODS\ZYY.LC.M  
 最后修改 : 2013-1-28 9:06:37 : - lqk  
 (调用后修改)

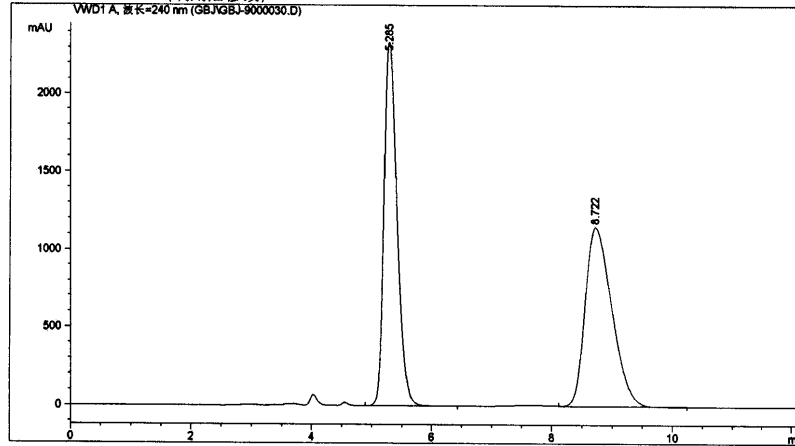

-----  
 面积百分比报告  
 -----

排序 : 信号  
 乘积因子 : 1.0000  
 稀释因子 : 1.0000  
 内标使用乘积因子和稀释因子

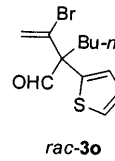

信号 1: VWD1 A, 波长=240 nm

| 峰 # | 保留时间 [min] | 类型 | 峰宽 [min] | 峰面积 mAU * s | 峰高 [mAU]   | 峰面积 %   |
|-----|------------|----|----------|-------------|------------|---------|
| 1   | 5.285      | VB | 0.2356   | 3.56210e4   | 2342.70557 | 50.0802 |
| 2   | 8.722      | VB | 0.4808   | 3.55069e4   | 1150.91724 | 49.9198 |

总量 : 7.11279e4 3493.62280

-----  
 \*\*\* 报告结束 \*\*\*  
 -----

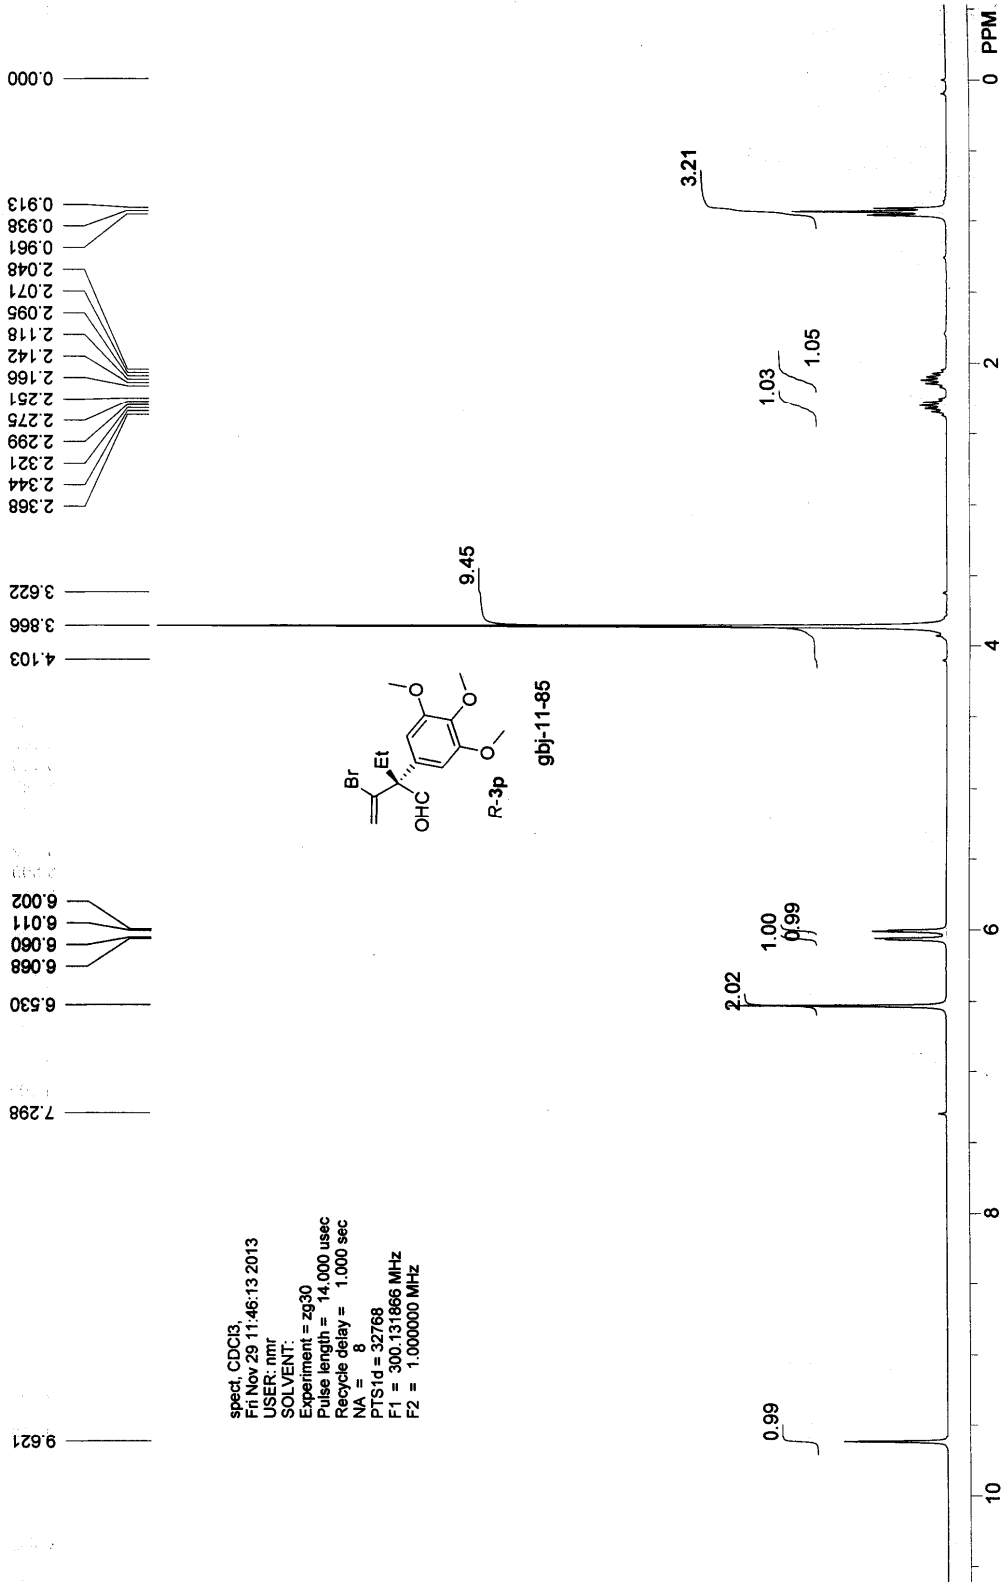

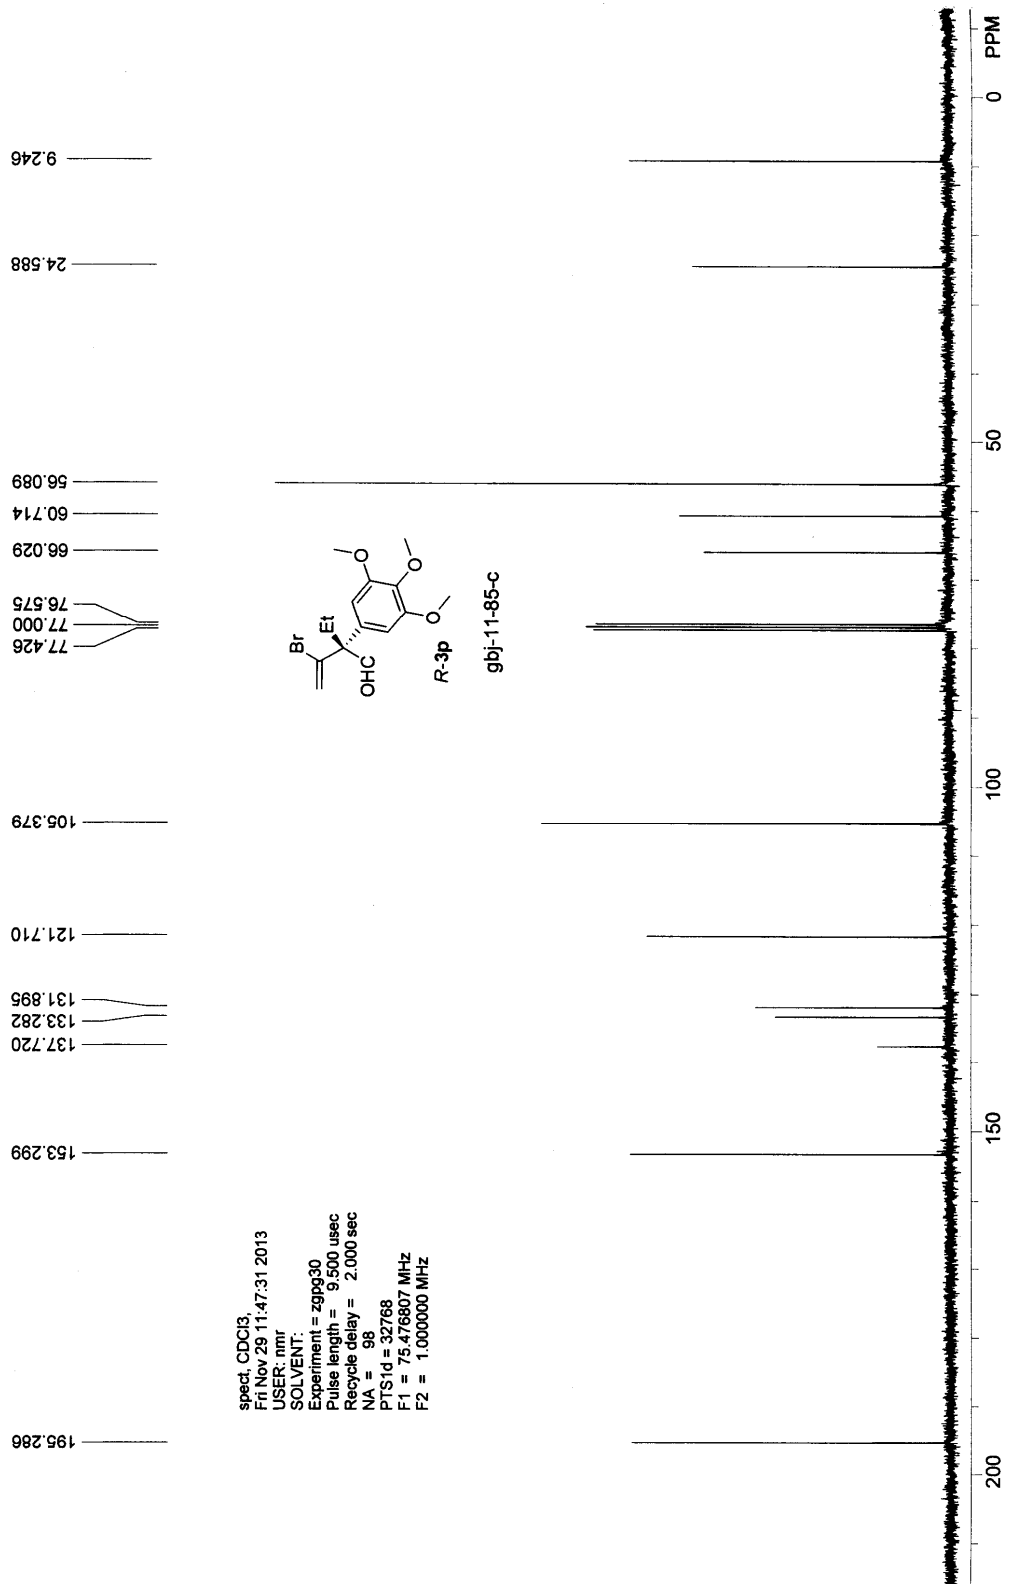

spectr\_CDCI3  
 Fri Nov 29 11:47:31 2013  
 USER: nmr  
 SOLVENT:  
 Experiment = zgpg30  
 Pulse length = 9.500 usec  
 Recycle delay = 2.000 sec  
 NA = 98  
 P1 = 32768  
 F1 = 75.476807 MHz  
 F2 = 1.000000 MHz

数据文件 D:\Chem32\1\DATA\GBJ\GBJ-11000018.D  
 样品名: gbj-11-85

OD-H, n-hexane/i-PrOH =95/5, 0.8 ml/min; 230nm

```

=====
进样日期       : 2013-11-29 15:08:35
样品名称       : gbj-11-85
操作者        : gbj
仪器           : 仪器 1
方法           : D:\CHEM32\1\METHODS\JJS.M
最后修改      : 2013-11-29 14:30:25 : gbj
                (调用后修改)
=====
  
```

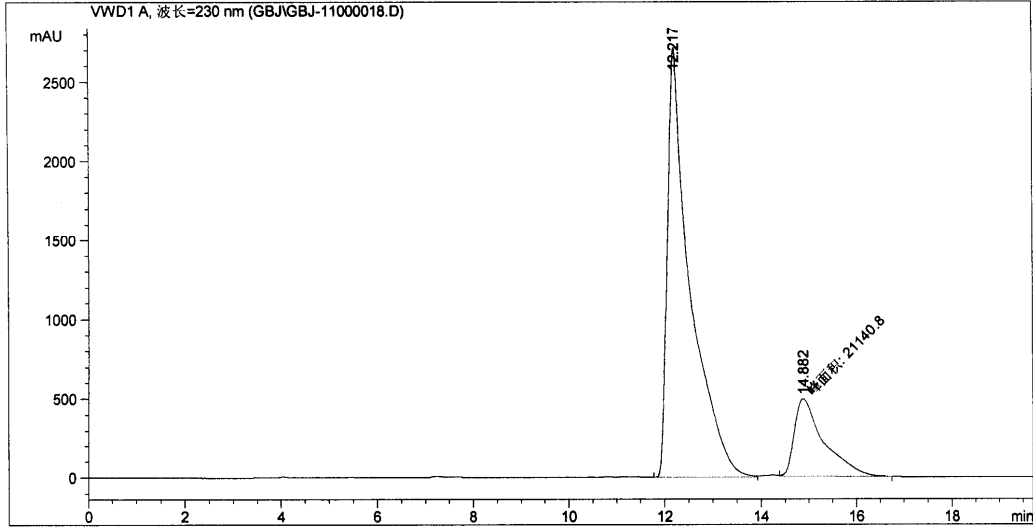

=====  
 面积百分比报告  
 =====

```

排序           :      信号
乘积因子       :      1.0000
稀释因子       :      1.0000
内标使用乘积因子和稀释因子
  
```

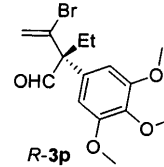

信号 1: VWD1 A, 波长=230 nm

| 峰 # | 保留时间 [min] | 类型 | 峰宽 [min] | 峰面积 mAU * s | 峰高 [mAU]   | 峰面积 %   |
|-----|------------|----|----------|-------------|------------|---------|
| 1   | 12.217     | VV | 0.4437   | 8.85860e4   | 2712.18286 | 80.7332 |
| 2   | 14.882     | MM | 0.7156   | 2.11408e4   | 492.38663  | 19.2668 |

总量 : 1.09727e5 3204.56949

=====  
 \*\*\* 报告结束 \*\*\*

数据文件 D:\Chem32\1\DATA\GBJ\GBJ-11000017.D  
 样品名: gbj-11-84

OD-H, n-hexane/i-PrOH =95/5, 0.8 ml/min; 230nm

```

=====
进样日期       : 2013-11-29 14:47:38
样品名称       : gbj-11-84
操作者        : gbj
仪器           : 仪器 1
方法           : D:\CHEM32\1\METHODS\JJS.M
最后修改      : 2013-11-29 14:30:25 : gbj
                (调用后修改)
=====
  
```

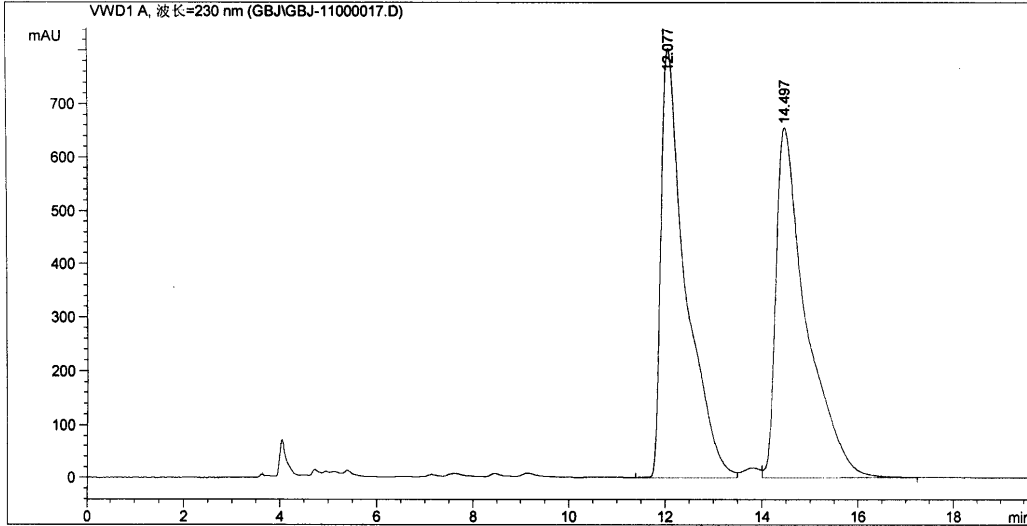

面积百分比报告

```

=====
排序           : 信号
乘积因子       : 1.0000
稀释因子       : 1.0000
内标使用乘积因子和稀释因子
  
```

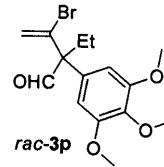

信号 1: VWD1 A, 波长=230 nm

| 峰 # | 保留时间 [min] | 类型 | 峰宽 [min] | 峰面积 mAU * s | 峰高 [mAU]  | 峰面积 %   |
|-----|------------|----|----------|-------------|-----------|---------|
| 1   | 12.077     | VV | 0.5046   | 2.83377e4   | 803.48798 | 49.8169 |
| 2   | 14.497     | VB | 0.6269   | 2.85459e4   | 654.33990 | 50.1831 |

总量 : 5.68836e4 1457.82788

\*\*\* 报告结束 \*\*\*

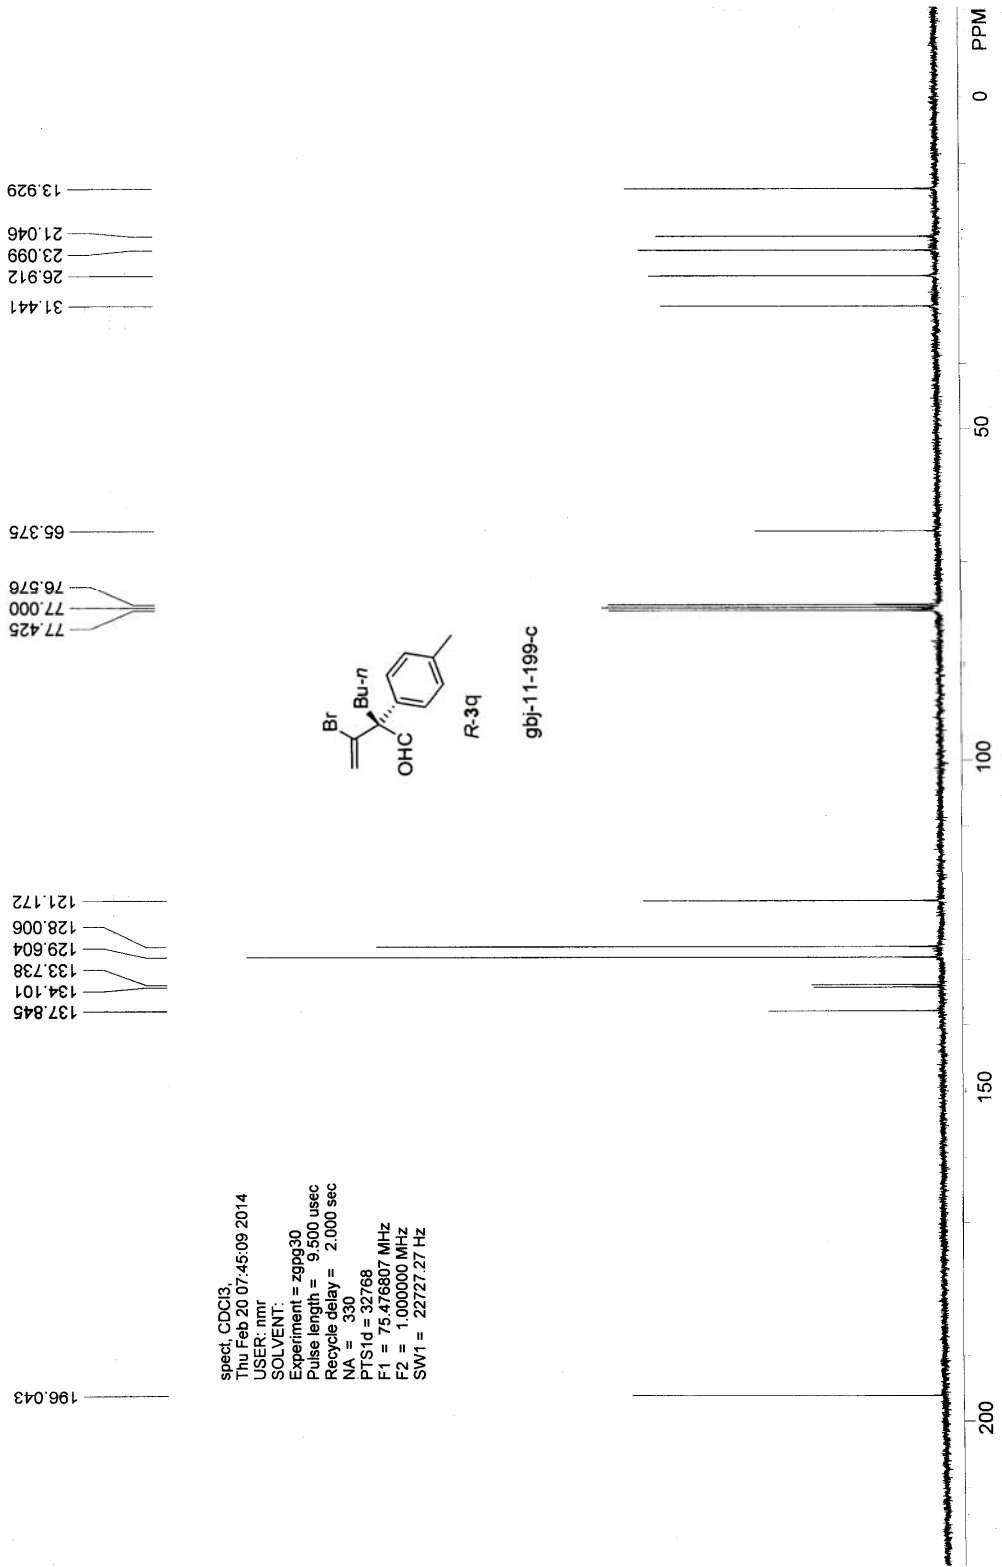

spectr\_CDCI3  
 Thu Feb 20 07:45:09 2014  
 USER: nmr  
 SOLVENT:  
 Experiment = zgpg30  
 Pulse length = 9.500 usec  
 Recycle delay = 2.000 sec  
 NA = 330  
 PTS1d = 32768  
 F1 = 75.476807 MHz  
 F2 = 1.000000 MHz  
 SWH = 22727.27 Hz



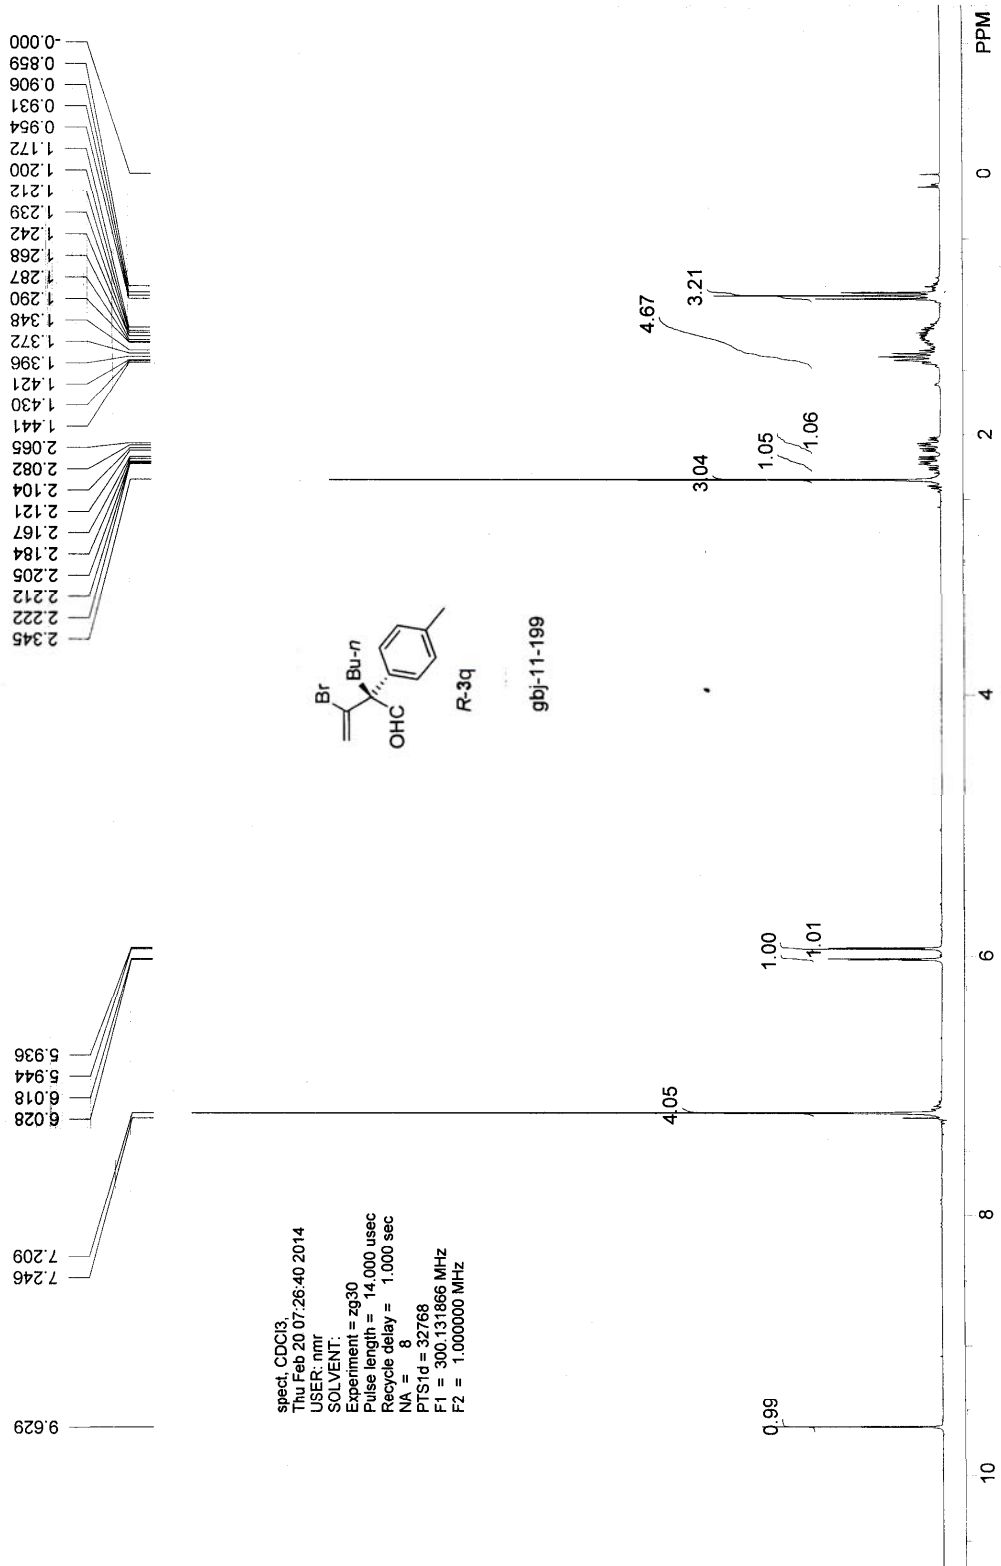

## gbj-11-199

实验时间: 2014-02-20, 16:12:22  
谱图文件: D:\浙大智达\N2000\样品\B0066.org

实验者: gbj  
报告时间: 2014-02-20, 16:32:18  
积分方法: 面积归一法

使用仪器类型: 气相色谱

检测器: FID

进样器: 分流

柱温: 程序升温

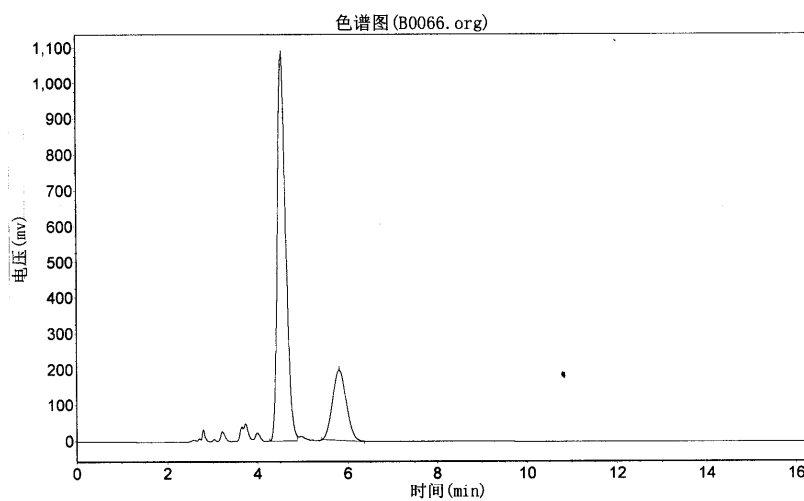

分析结果表

| 峰号 | 峰名 | 保留时间  | 峰高          | 峰面积          | 含量       |
|----|----|-------|-------------|--------------|----------|
| 1  |    | 4.547 | 1080967.375 | 13827850.000 | 76.8174  |
| 2  |    | 5.812 | 196018.641  | 4173086.500  | 23.1826  |
| 总计 |    |       | 1276986.016 | 18000936.500 | 100.0000 |

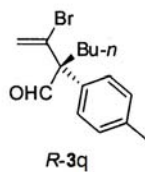

2014-02-20

## gbj-11-198

实验时间: 2014-02-20, 15:54:12  
谱图文件: D:\浙大智达\N2000\样品\B0065.org

实验者: gbj  
报告时间: 2014-02-20, 16:31:14  
积分方法: 面积归一法

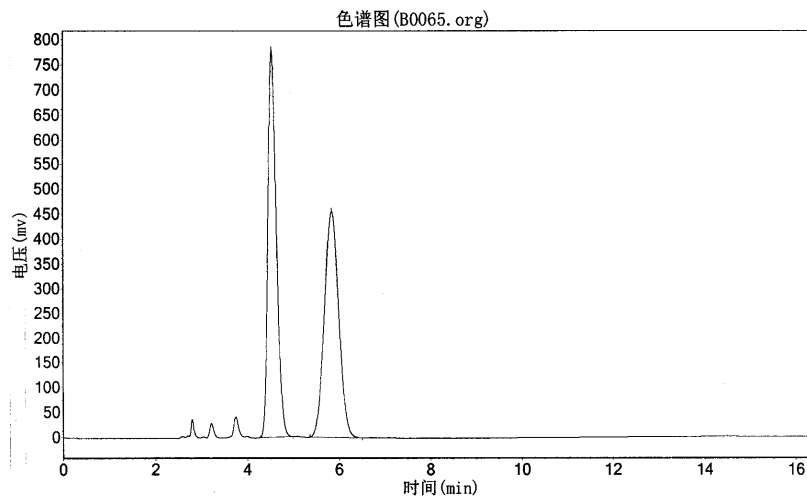

分析结果表

| 峰号 | 峰名 | 保留时间  | 峰高          | 峰面积          | 含量       |
|----|----|-------|-------------|--------------|----------|
| 1  |    | 4.548 | 778064.750  | 9939070.000  | 49.9030  |
| 2  |    | 5.847 | 456001.250  | 9977722.000  | 50.0970  |
| 总计 |    |       | 1234066.000 | 19916792.000 | 100.0000 |

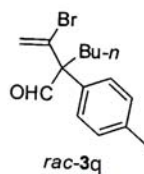

2014-02-20
